# Supplementary material for: PASK links cellular energy metabolism with a mitotic self-renewal network to establish differentiation competence
Source: eLife. 2023 Apr 13;12:e81717. doi: 10.7554/eLife.81717 (PMC10162801; doi:10.7554/eLife.81717)
Supplement: Figure 1—source data 2. [file elife-81717-fig1-data2.xlsx]

## Sheet: summary
contrast	summary	count	percent
P vs C day -1	up-regulated	1601	9.36
P vs C day -1	down-regulated	2337	13.66
P vs C day -1	outliers	1	0.01
P vs C day -1	low counts < 5.3	2654	15.51
P vs C day 0	up-regulated	2414	14.11
P vs C day 0	down-regulated	3089	18.05
P vs C day 0	outliers	1	0.01
P vs C day 0	low counts < 1.9	332	1.94
P vs C day 1	up-regulated	3591	20.99
P vs C day 1	down-regulated	4813	28.13
P vs C day 1	outliers	1	0.01
P vs C day 1	low counts < 0.5	0	0

## Sheet: P_vs_C_day_-1
id	gene_name	biotype	chromosome	description	baseMean	log2FoldChange	lfcSE	stat	pvalue	padj
ENSMUSG00000007777	0610009B22Rik	protein_coding	11	RIKEN cDNA 0610009B22 gene	450.584	-0.00247401	0.0848391	-0.0291827	0.976719	0.989796
ENSMUSG00000086714	0610009E02Rik	processed_transcript	2	RIKEN cDNA 0610009E02 gene	6.08158	0.124504	0.394686	0.307945	0.758125	0.869358
ENSMUSG00000043644	0610009L18Rik	bidirectional_promoter_lncRNA	11	RIKEN cDNA 0610009L18 gene	28.6499	0.233398	0.271472	0.870132	0.384228	0.588368
ENSMUSG00000024442	0610009O20Rik	protein_coding	18	RIKEN cDNA 0610009O20 gene	554.006	0.17283	0.0720515	2.39888	0.0164453	0.0582718
ENSMUSG00000042208	0610010F05Rik	protein_coding	11	RIKEN cDNA 0610010F05 gene	1556.16	0.0961798	0.054207	1.77412	0.0760433	0.193149
ENSMUSG00000020831	0610010K14Rik	protein_coding	11	RIKEN cDNA 0610010K14 gene	10.8468	0.0838766	0.342761	0.240856	0.809666	0.900896
ENSMUSG00000107002	0610012G03Rik	protein_coding	16	RIKEN cDNA 0610012G03 gene	393.715	0.0692629	0.090747	0.763373	0.445241	0.64144
ENSMUSG00000058706	0610030E20Rik	protein_coding	6	RIKEN cDNA 0610030E20 gene	282.598	0.0674408	0.0968261	0.696471	0.486134	0.677793
ENSMUSG00000028608	0610037L13Rik	protein_coding	4	RIKEN cDNA 0610037L13 gene	679.66	-0.0435189	0.0700933	-0.620909	0.534659	0.714642
ENSMUSG00000097882	0610038B21Rik	antisense	8	RIKEN cDNA 0610038B21 gene	39.4079	0.261227	0.224641	1.16266	0.244969	0.439368
ENSMUSG00000089889	0610040B10Rik	antisense	5	RIKEN cDNA 0610040B10 gene	24.8324	0.071579	0.270306	0.264906	0.791082	0.890221
ENSMUSG00000097863	1010001B22Rik	lincRNA	5	RIKEN cDNA 1010001B22 gene	2.71786	-0.162914	0.407083	-0.444637	0.656582
ENSMUSG00000090066	1110002E22Rik	protein_coding	3	RIKEN cDNA 1110002E22 gene	1613.92	-0.442579	0.087089	-5.0842	3.6918e-07	4.30422e-06
ENSMUSG00000071456	1110002L01Rik	antisense	12	RIKEN cDNA 1110002L01 gene	118.813	0.158721	0.140314	1.13138	0.257895	0.455014
ENSMUSG00000106291	1110003F10Rik	TEC	5	RIKEN cDNA 1110003F10 gene	2.53395	0.178561	0.407824	0.396211	0.69195
ENSMUSG00000022972	1110004E09Rik	protein_coding	16	RIKEN cDNA 1110004E09 gene	386.244	0.0771175	0.0938583	0.82132	0.411464	0.612999
ENSMUSG00000030663	1110004F10Rik	protein_coding	7	RIKEN cDNA 1110004F10 gene	1118.87	0.0130272	0.0583482	0.223269	0.823326	0.908196
ENSMUSG00000107121	1110006O24Rik	lincRNA	5	RIKEN cDNA 1110006O24 gene	4.14816	0.435053	0.411623	1.02394	0.305866
ENSMUSG00000027637	1110008F13Rik	protein_coding	2	RIKEN cDNA 1110008F13 gene	1937.45	-0.0804111	0.0444329	-1.80964	0.0703521	0.182529
ENSMUSG00000021023	1110008L16Rik	protein_coding	12	RIKEN cDNA 1110008L16 gene	375.014	-0.062749	0.0834671	-0.751851	0.452141	0.647724
ENSMUSG00000039195	1110008P14Rik	protein_coding	2	RIKEN cDNA 1110008P14 gene	304.952	0.276149	0.096803	2.85239	0.0043392	0.0195548
ENSMUSG00000045237	1110012L19Rik	protein_coding	X	RIKEN cDNA 1110012L19 gene	401.525	0.2503	0.0945489	2.64838	0.0080879	0.0327801
ENSMUSG00000085151	1110018N20Rik	processed_transcript	2	RIKEN cDNA 1110018N20 gene	3.627	-0.210263	0.40911	-0.737141	0.461037
ENSMUSG00000097616	1110019D14Rik	lincRNA	6	RIKEN cDNA 1110019D14 gene	71.7839	-0.0592701	0.172026	-0.344876	0.730187	0.85345
ENSMUSG00000097047	1110020A21Rik	lincRNA	17	RIKEN cDNA 1110020A21 gene	14.1161	0.199875	0.320456	0.618745	0.536085	0.715753
ENSMUSG00000103520	1110025M09Rik	TEC	15	RIKEN cDNA 1110025M09 gene	19.3524	0.223854	0.302998	0.741872	0.458165	0.653038
ENSMUSG00000037971	1110032A03Rik	protein_coding	9	RIKEN cDNA 1110032A03 gene	137.511	0.321266	0.13983	2.29937	0.0214839	0.0724839
ENSMUSG00000044991	1110034G24Rik	protein_coding	2	RIKEN cDNA 1110034G24 gene	76.8227	0.191709	0.176227	1.09001	0.27571	0.475706
ENSMUSG00000092203	1110038B12Rik	processed_transcript	17	RIKEN cDNA 1110038B12 gene	1038.25	0.00927648	0.0725502	0.127863	0.898258	0.94787
ENSMUSG00000063236	1110038F14Rik	protein_coding	15	RIKEN cDNA 1110038F14 gene	588.678	-0.124427	0.0674559	-1.84475	0.0650739	0.172714
ENSMUSG00000085457	1110046J04Rik	antisense	13	RIKEN cDNA 1110046J04 gene	133.441	0.270231	0.120499	2.23914	0.0251468	0.0823251
ENSMUSG00000040591	1110051M20Rik	protein_coding	2	RIKEN cDNA 1110051M20 gene	785.934	0.0975569	0.068978	1.41468	0.157163	0.324556
ENSMUSG00000035171	1110059E24Rik	protein_coding	19	RIKEN cDNA 1110059E24 gene	663.451	-0.0811624	0.070112	-1.15738	0.247118	0.442042
ENSMUSG00000032551	1110059G10Rik	protein_coding	9	RIKEN cDNA 1110059G10 gene	337.17	0.0224496	0.0880673	0.254934	0.798774	0.894597
ENSMUSG00000078570	1110065P20Rik	protein_coding	4	RIKEN cDNA 1110065P20 gene	445.169	-0.347514	0.097333	-3.57149	0.000354951	0.00227461
ENSMUSG00000045414	1190002N15Rik	protein_coding	9	RIKEN cDNA 1190002N15 gene	7434.97	-0.577332	0.038016	-15.1866	4.33739e-52	4.71471e-50
ENSMUSG00000043687	1190005I06Rik	protein_coding	8	RIKEN cDNA 1190005I06 gene	15.4682	0.337542	0.308383	1.08483	0.277996	0.477314
ENSMUSG00000063320	1190007I07Rik	protein_coding	10	RIKEN cDNA 1190007I07 gene	38.6956	0.155806	0.231723	0.672852	0.501041	0.689731
ENSMUSG00000097290	1300002E11Rik	lincRNA	16	RIKEN cDNA 1300002E11 gene	117.092	0.141082	0.14259	0.989543	0.322398	0.525943
ENSMUSG00000096221	1500002C15Rik	antisense	4	RIKEN cDNA 1500002C15 gene	36.933	0.173592	0.231872	0.746953	0.455092	0.650384
ENSMUSG00000097595	1500002F19Rik	processed_transcript	7	RIKEN cDNA 1500002F19 gene	2.33255	0.117072	0.390279	0.53221	0.594581
ENSMUSG00000087651	1500009L16Rik	protein_coding	10	RIKEN cDNA 1500009L16 gene	8.42251	0.23026	0.35696	0.623225	0.533137	0.713639
ENSMUSG00000072694	1500011B03Rik	protein_coding	5	RIKEN cDNA 1500011B03 gene	120.906	0.207368	0.136606	1.51798	0.12902	0.283688
ENSMUSG00000051319	1500011K16Rik	protein_coding	2	RIKEN cDNA 1500011K16 gene	287.106	0.0510468	0.103167	0.494853	0.620704	0.779831
ENSMUSG00000098702	1500015A07Rik	antisense	18	RIKEN cDNA 1500015A07 gene	33.6151	0.198122	0.246586	0.799391	0.424064	0.622974
ENSMUSG00000026051	1500015O10Rik	protein_coding	1	RIKEN cDNA 1500015O10 gene	4.20215	-0.495908	0.409287	-1.7307	0.083505
ENSMUSG00000043747	1520401A03Rik	protein_coding	17	RIKEN cDNA 1520401A03 gene	3.27834	-0.540074	0.400877	-2.1585	0.0308888
ENSMUSG00000035595	1600002K03Rik	protein_coding	10	RIKEN cDNA 1600002K03 gene	107.296	-0.0911444	0.14185	-0.641928	0.52092	0.705497
ENSMUSG00000050088	1600012H06Rik	protein_coding	17	RIKEN cDNA 1600012H06 gene	1018.66	0.111379	0.0562396	1.98065	0.0476306	0.135631
ENSMUSG00000054676	1600014C10Rik	protein_coding	7	RIKEN cDNA 1600014C10 gene	306.529	0.204782	0.0878478	2.33095	0.0197558	0.0677603
ENSMUSG00000097048	1600020E01Rik	antisense	6	RIKEN cDNA 1600020E01 gene	190.048	0.0271144	0.139218	0.19481	0.845542	0.920283
ENSMUSG00000104986	1600023N17Rik	TEC	5	RIKEN cDNA 1600023N17 gene	4.60878	-0.48644	0.403416	-1.15217	0.249251
ENSMUSG00000110340	1600027J07Rik	lincRNA	8	RIKEN cDNA 1600027J07 gene	3.33841	-0.646891	0.404696	-2.41027	0.0159407
ENSMUSG00000085984	1700001G11Rik	processed_transcript	14	RIKEN cDNA 1700001G11 gene	6.13135	0.197866	0.392229	0.498092	0.618419	0.778042
ENSMUSG00000103746	1700001G17Rik	TEC	1	RIKEN cDNA 1700001G17 gene	2.82838	-0.216804	0.414108	-0.498453	0.618165
ENSMUSG00000075511	1700001L05Rik	lincRNA	15	RIKEN cDNA 1700001L05 gene	16.415	0.0334528	0.306335	0.108974	0.913223	0.95504
ENSMUSG00000044320	1700001O22Rik	protein_coding	2	RIKEN cDNA 1700001O22 gene	4.33858	-0.144934	0.409269	-0.333635	0.738655
ENSMUSG00000018543	1700001P01Rik	protein_coding	11	RIKEN cDNA 1700001P01 gene	2.07459	0.263606	0.403966	0.543442	0.586826
ENSMUSG00000030030	1700003E16Rik	protein_coding	6	RIKEN cDNA 1700003E16 gene	49.7306	0.38001	0.205989	1.84436	0.0651303	0.172832
ENSMUSG00000038523	1700003F12Rik	protein_coding	2	RIKEN cDNA 1700003F12 gene	63.9199	-0.353385	0.205726	-1.72692	0.0841814	0.208214
ENSMUSG00000087621	1700003G18Rik	processed_transcript	7	RIKEN cDNA 1700003G18 gene	2.41561	0.00495042	0.410394	0.0121244	0.990326
ENSMUSG00000034764	1700006J14Rik	antisense	10	RIKEN cDNA 1700006J14 gene	12.8155	0.897033	0.339272	2.57318	0.0100768	0.039341
ENSMUSG00000057816	1700007G11Rik	protein_coding	5	RIKEN cDNA 1700007G11 gene	7.02208	-0.232626	0.386844	-0.568422	0.569749	0.74134
ENSMUSG00000097318	1700007L15Rik	lincRNA	16	RIKEN cDNA 1700007L15 gene	22.6333	0.175966	0.277241	0.632649	0.526963	0.709934
ENSMUSG00000101225	1700008J07Rik	antisense	7	RIKEN cDNA 1700008J07 gene	10.0885	-0.131317	0.372279	-0.36577	0.714537	0.843614
ENSMUSG00000028287	1700009N14Rik	protein_coding	4	RIKEN cDNA 1700009N14 gene	3.25848	-0.592341	0.413838	-1.29718	0.194571
ENSMUSG00000058925	1700011I03Rik	protein_coding	18	RIKEN cDNA 1700011I03 gene	1.91915	0.00168803	0.365089	0.00493139	0.996065
ENSMUSG00000031927	1700012B09Rik	protein_coding	9	RIKEN cDNA 1700012B09 gene	53.288	0.733148	0.188168	3.86361	0.000111723	0.00081494
ENSMUSG00000110424	1700012D14Rik	processed_transcript	7	RIKEN cDNA 1700012D14 gene	15.6718	0.148816	0.329841	0.452422	0.650965	0.800323
ENSMUSG00000027886	1700013F07Rik	protein_coding	3	RIKEN cDNA 1700013F07 gene	2.73144	0.513148	0.411575	1.18573	0.235728
ENSMUSG00000032300	1700017B05Rik	protein_coding	9	RIKEN cDNA 1700017B05 gene	404.815	0.273653	0.0971674	2.81644	0.00485595	0.0214621
ENSMUSG00000043629	1700019D03Rik	protein_coding	1	RIKEN cDNA 1700019D03 gene	11.253	1.08129	0.372244	2.93065	0.00338249	0.0159234
ENSMUSG00000085438	1700020I14Rik	lincRNA	2	RIKEN cDNA 1700020I14 gene	2950.76	0.0616516	0.0496872	1.24088	0.214649	0.402279
ENSMUSG00000019797	1700021F05Rik	protein_coding	10	RIKEN cDNA 1700021F05 gene	387.369	0.214281	0.104606	2.04852	0.0405094	0.119276
ENSMUSG00000032666	1700025G04Rik	protein_coding	1	RIKEN cDNA 1700025G04 gene	398.187	0.168122	0.074421	2.2578	0.023958	0.0791501
ENSMUSG00000109962	1700025L06Rik	lincRNA	7	RIKEN cDNA 1700025L06 gene	20.8805	-1.07145	0.343456	-3.16103	0.00157211	0.00835893
ENSMUSG00000063838	1700027J19Rik	protein_coding	7	CDC42 effector protein (Rho GTPase binding) 5	320.563	-0.232579	0.094025	-2.47373	0.0133712	0.049271
ENSMUSG00000097321	1700028E10Rik	processed_transcript	5	RIKEN cDNA 1700028E10 gene	4.53882	-0.263101	0.40874	-0.660838	0.508716
ENSMUSG00000038782	1700028J19Rik	protein_coding	7	RIKEN cDNA 1700028J19 gene	4.9877	0.322152	0.407974	0.771864	0.440195
ENSMUSG00000078635	1700028N14Rik	processed_transcript	11	RIKEN cDNA 1700028N14 gene	4.54246	-0.0481212	0.407973	-0.114324	0.908981
ENSMUSG00000044916	1700029I15Rik	protein_coding	2	RIKEN cDNA 1700029I15 gene	8.40164	0.780898	0.373958	2.03714	0.0416362	0.121997
ENSMUSG00000071103	1700029J07Rik	protein_coding	8	RIKEN cDNA 1700029J07 gene	20.688	0.634152	0.300461	2.10932	0.0349173	0.10643
ENSMUSG00000086459	1700030C12Rik	processed_transcript	11	RIKEN cDNA 1700030C12 gene	2.43407	-0.137018	0.411972	-0.302176	0.762518
ENSMUSG00000031847	1700030J22Rik	protein_coding	8	RIKEN cDNA 1700030J22 gene	29.5837	-0.200187	0.262741	-0.759845	0.447347	0.643521
ENSMUSG00000052794	1700030K09Rik	protein_coding	8	RIKEN cDNA 1700030K09 gene	207.64	-0.0758579	0.111105	-0.683077	0.494558	0.68498
ENSMUSG00000092239	1700031A10Rik	antisense	17	RIKEN cDNA 1700031A10 gene	2.93116	-0.334115	0.412715	-0.776071	0.437707
ENSMUSG00000097893	1700034P13Rik	antisense	1	RIKEN cDNA 1700034P13 gene	2.34161	0.00187838	0.410064	0.00483581	0.996142
ENSMUSG00000005983	1700037C18Rik	protein_coding	16	RIKEN cDNA 1700037C18 gene	64.0399	-0.321928	0.180473	-1.78501	0.0742593	0.190012
ENSMUSG00000027327	1700037H04Rik	protein_coding	2	RIKEN cDNA 1700037H04 gene	574.29	0.303482	0.0742003	4.08909	4.33071e-05	0.000351539
ENSMUSG00000107406	1700040L08Rik	antisense	6	RIKEN cDNA 1700040L08 gene	2.5155	-0.385969	0.407517	-1.06607	0.286391
ENSMUSG00000054822	1700041G16Rik	lincRNA	8	RIKEN cDNA 1700041G16 gene	2.63163	-0.398461	0.412224	-0.945306	0.344503
ENSMUSG00000086391	1700042O10Rik	antisense	11	RIKEN cDNA 1700042O10 gene	5.85089	-0.962581	0.399836	-2.32201	0.0202323	0.069116
ENSMUSG00000099681	1700052K11Rik	antisense	11	RIKEN cDNA 1700052K11 gene	268.99	0.171225	0.0965629	1.77348	0.0761484	0.193272
ENSMUSG00000070997	1700055D18Rik	antisense	4	RIKEN cDNA 1700055D18 gene	5.45174	-0.271763	0.400271	-0.680076	0.496456	0.686294
ENSMUSG00000044854	1700056E22Rik	protein_coding	1	RIKEN cDNA 1700056E22 gene	25.5221	-0.311428	0.269523	-1.15183	0.249389	0.444413
ENSMUSG00000084792	1700056N10Rik	lincRNA	16	RIKEN cDNA 1700056N10 gene	5.82536	0.0387897	0.403241	0.0938483	0.92523	0.961544
ENSMUSG00000028009	1700061I17Rik	lincRNA	3	RIKEN cDNA 1700061I17 gene	2.91584	-0.386888	0.414111	-0.861172	0.389143
ENSMUSG00000038323	1700066M21Rik	protein_coding	1	UPF0565	783.398	-0.0610399	0.0594706	-1.02616	0.304815	0.507159
ENSMUSG00000046408	1700067K01Rik	protein_coding	8	UPF0575	3.01663	0.289814	0.411554	0.642739	0.520394
ENSMUSG00000113209	1700081N11Rik	bidirectional_promoter_lncRNA	12	RIKEN cDNA 1700081N11 gene	1.99522	0.109563	0.388118	0.395332	0.692598
ENSMUSG00000100747	1700084E18Rik	antisense	2	RIKEN cDNA 1700084E18 gene	5.025	0.817124	0.407109	1.98208	0.0474702
ENSMUSG00000071265	1700086L19Rik	transcribed_unitary_pseudogene	12		6.80576	-0.600464	0.41262	-1.81143	0.0700746	0.182074
ENSMUSG00000097080	1700086O06Rik	lincRNA	18	RIKEN cDNA 1700086O06 gene	17.5793	0.0253137	0.303406	0.083702	0.933293	0.965458
ENSMUSG00000033029	1700088E04Rik	protein_coding	15	UPF0193	98.1003	0.0825843	0.154965	0.53381	0.593473	0.759412
ENSMUSG00000020286	1700093K21Rik	protein_coding	11	Uncharacterized	104.528	-0.315338	0.144884	-2.17118	0.0299178	0.0945816
ENSMUSG00000101856	1700096K18Rik	lincRNA	5	RIKEN cDNA 1700096K18 gene	25.0864	-0.370802	0.285089	-1.31921	0.187097	0.367484
ENSMUSG00000097675	1700101I11Rik	processed_transcript	6	RIKEN cDNA 1700101I11 gene	2.6736	0.288412	0.412225	0.663451	0.507042
ENSMUSG00000032611	1700102P08Rik	protein_coding	9	chromosome 3 open reading frame 62	3.76701	-0.120559	0.414237	-0.302395	0.762351
ENSMUSG00000101009	1700108F19Rik	processed_transcript	14	RIKEN cDNA 1700108F19 gene	3.14387	-0.0951015	0.409003	-0.324863	0.745284
ENSMUSG00000008307	1700109H08Rik	protein_coding	5	RIKEN cDNA 1700109H08 gene	17.8687	0.223324	0.283966	0.776785	0.437286	0.634328
ENSMUSG00000101574	1700112H15Rik	lincRNA	1	RIKEN cDNA 1700112H15 gene	3.94132	0.118086	0.411983	0.266319	0.789993
ENSMUSG00000097527	1700112J16Rik	lincRNA	7	RIKEN cDNA 1700112J16 gene	2.20212	0.208057	0.390275	0.710584	0.477342
ENSMUSG00000096935	1700113A16Rik	antisense	3	RIKEN cDNA 1700113A16 gene	8.48166	-0.604321	0.381654	-1.59594	0.110503	0.254083
ENSMUSG00000045391	1700120B22Rik	bidirectional_promoter_lncRNA	10	RIKEN cDNA 1700120B22 gene	2.04116	0.0887883	0.399706	0.218773	0.826827
ENSMUSG00000100599	1700120C14Rik	processed_transcript	15	RIKEN cDNA 1700120C14 gene	12.0181	0.123207	0.335673	0.366267	0.714166	0.84351
ENSMUSG00000087685	1700122E12Rik	processed_transcript	8	RIKEN cDNA 1700122E12 gene	5.16	0.0358941	0.404277	0.0846536	0.932537
ENSMUSG00000085614	1700123M08Rik	processed_transcript	4	RIKEN cDNA 1700123M08 gene	19.142	0.105407	0.304403	0.351177	0.725456	0.850241
ENSMUSG00000040822	1700123O20Rik	protein_coding	14	Uncharacterized	797.749	0.0183424	0.0647037	0.283483	0.776807	0.881153
ENSMUSG00000100094	1810008I18Rik	lincRNA	7	RIKEN cDNA 1810008I18 gene	3.05765	-0.164938	0.413691	-0.39668	0.691604
ENSMUSG00000071653	1810009A15Rik	protein_coding	19	Uncharacterized	2.63658	-0.227636	0.411963	-0.471538	0.637257
ENSMUSG00000078607	1810010H24Rik	protein_coding	11	chromosome 17 open reading frame 58	12.4371	0.0665096	0.34692	0.194962	0.845422	0.920283
ENSMUSG00000022507	1810013L24Rik	protein_coding	16	UPF0472	1744.1	0.204782	0.0462464	4.42814	9.50482e-06	8.78588e-05
ENSMUSG00000097412	1810014B01Rik	transcribed_unprocessed_pseudogene	10	RIKEN cDNA 1810014B01 gene	39.0619	0.378939	0.234351	1.61994	0.105244	0.246188
ENSMUSG00000097115	1810019N24Rik	lincRNA	7	RIKEN cDNA 1810019N24 gene	4.74569	-0.300317	0.411033	-0.739688	0.459489
ENSMUSG00000087331	1810021B22Rik	antisense	15	RIKEN cDNA 1810021B22 gene	13.8116	0.254439	0.352953	0.757075	0.449005	0.644806
ENSMUSG00000078784	1810022K09Rik	protein_coding	3	Mus musculus RIKEN cDNA 1810022K09 (1810022K09Rik), transcript variant 1, mRNA.	614.551	-0.164562	0.0799316	-2.05855	0.039537	0.117152
ENSMUSG00000044145	1810024B03Rik	protein_coding	2	RIKEN cDNA 1810024B03 gene	23.2582	0.665522	0.290201	2.28879	0.0220918	0.0742055
ENSMUSG00000101970	1810026B05Rik	processed_transcript	7	RIKEN cDNA 1810026B05 gene	208.44	-0.0552833	0.113198	-0.488564	0.625151	0.783042
ENSMUSG00000044148	1810030O07Rik	protein_coding	X	Uncharacterized	1098.37	-0.0523956	0.0511949	-1.02347	0.306084	0.508452
ENSMUSG00000020812	1810032O08Rik	protein_coding	11	RIKEN cDNA 1810032O08 gene	138.597	-0.142002	0.143746	-0.986715	0.323782	0.527309
ENSMUSG00000097101	1810034E14Rik	antisense	13	RIKEN cDNA 1810034E14 gene	44.3051	-0.00385657	0.218809	-0.0173865	0.986128	0.993421
ENSMUSG00000054091	1810037I17Rik	protein_coding	3	Uncharacterized	664.992	0.0799079	0.0694289	1.15078	0.249825	0.444745
ENSMUSG00000102112	1810041H14Rik	antisense	14	RIKEN cDNA 1810041H14 gene	2.19834	0.144733	0.41044	0.314092	0.753452
ENSMUSG00000062760	1810041L15Rik	protein_coding	15	Mus musculus RIKEN cDNA 1810041L15 (1810041L15Rik), transcript variant 2, mRNA.	11.6669	-0.539775	0.41036	-2.01893	0.0434945	0.126265
ENSMUSG00000020284	1810043G02Rik	protein_coding	10	chromosome 21 open reading frame 2	503.633	0.15623	0.0792489	1.97168	0.0486464	0.137638
ENSMUSG00000100680	1810044D09Rik	lincRNA	6	RIKEN cDNA 1810044D09 gene	7.53364	-0.242947	0.398821	-0.644678	0.519136	0.704119
ENSMUSG00000097221	1810049J17Rik	protein_coding	15	RIKEN cDNA 1810049J17 gene	5.81455	-0.254923	0.390526	-0.627143	0.530566	0.712161
ENSMUSG00000035372	1810055G02Rik	protein_coding	19	Mus musculus RIKEN cDNA 1810055G02 (1810055G02Rik), transcript variant 4, mRNA.	562.76	0.306828	0.079518	3.85828	0.00011419	0.000829985
ENSMUSG00000073155	1810058I24Rik	lincRNA	6	RIKEN cDNA 1810058I24 gene	299.568	0.0766628	0.106751	0.71842	0.472498	0.665429
ENSMUSG00000108207	1810059H22Rik	processed_transcript	5	RIKEN cDNA 1810059H22 gene	29.0698	0.536526	0.252749	2.11059	0.0348078	0.106164
ENSMUSG00000027713	1810062G17Rik	protein_coding	3	RIKEN cDNA 1810062G17 gene	8.45854	0.25616	0.368561	0.682476	0.494938	0.685179
ENSMUSG00000084925	1810062O18Rik	antisense	14	RIKEN cDNA 1810062O18 gene	8.46429	0.344257	0.394058	0.955165	0.339494	0.544132
ENSMUSG00000013653	1810065E05Rik	protein_coding	11	RIKEN cDNA 1810065E05 gene	3.1599	-0.604097	0.412257	-1.59133	0.111536
ENSMUSG00000087165	2010001A14Rik	processed_transcript	11	RIKEN cDNA 2010001A14 gene	21.5301	0.598527	0.286749	2.08023	0.0375044	0.112257
ENSMUSG00000096983	2010015M23Rik	lincRNA	11	RIKEN cDNA 2010015M23 gene	5.64075	-0.214016	0.403239	-0.533876	0.593427	0.759412
ENSMUSG00000021290	2010107E04Rik	protein_coding	12	6.8 kDa mitochondrial proteolipid	1461.85	-0.355287	0.0597582	-5.94528	2.75977e-09	4.25805e-08
ENSMUSG00000029384	2010109A12Rik	protein_coding	5	RIKEN cDNA 2010109A12 gene	3.46093	-0.556532	0.413726	-1.26156	0.207107
ENSMUSG00000097755	2010110K18Rik	lincRNA	18	RIKEN cDNA 2010110K18 gene	8.24773	0.120023	0.35851	0.319843	0.749087	0.863752
ENSMUSG00000021458	2010111I01Rik	protein_coding	13	chromosome 9 open reading frame 3	2431.96	-0.409278	0.0681762	-6.00352	1.93084e-09	3.04739e-08
ENSMUSG00000063018	2010204K13Rik	processed_transcript	X	RIKEN cDNA 2010204K13 gene	35.8683	-0.403926	0.229668	-1.74121	0.0816471	0.203794
ENSMUSG00000097289	2010300F17Rik	lincRNA	11	RIKEN cDNA 2010300F17 gene	34.2514	-0.228615	0.277446	-0.826933	0.408275	0.610317
ENSMUSG00000101268	2010310C07Rik	antisense	6	RIKEN cDNA 2010310C07 gene	8.01462	0.104314	0.389871	0.254294	0.799268	0.894759
ENSMUSG00000074829	2010315B03Rik	protein_coding	9	RIKEN cDNA 2010315B03 gene	306.504	0.211529	0.0955815	2.21405	0.0268255	0.0865274
ENSMUSG00000100691	2010320M18Rik	lincRNA	8	RIKEN cDNA 2010320M18 gene	97.9008	0.0461412	0.159419	0.290023	0.771799	0.877593
ENSMUSG00000030587	2200002D01Rik	protein_coding	7	RIKEN cDNA 2200002D01 gene	243.657	0.211634	0.104524	2.02447	0.0429222	0.124955
ENSMUSG00000097165	2210008F06Rik	lincRNA	11	RIKEN cDNA 2210008F06 gene	8.87169	-0.375382	0.367261	-0.995924	0.319287	0.522755
ENSMUSG00000074217	2210011C24Rik	protein_coding	8	RIKEN cDNA 2210011C24 gene	23.8298	0.324474	0.355884	0.989804	0.32227	0.525912
ENSMUSG00000101791	2210011K15Rik	lincRNA	1	RIKEN cDNA 2210011K15 gene	7.3719	1.06348	0.389003	2.65155	0.0080123	0.0325467
ENSMUSG00000021550	2210016F16Rik	protein_coding	13	RIKEN cDNA 2210016F16 gene	14.4188	0.110489	0.336505	0.333392	0.738838	0.85841
ENSMUSG00000029559	2210016L21Rik	protein_coding	5	chromosome 12 open reading frame 43	539.786	0.0239276	0.0746391	0.320604	0.748511	0.863424
ENSMUSG00000039563	2210406O10Rik	lincRNA	5	RIKEN cDNA 2210406O10 gene	4.2697	0.043673	0.411192	0.101569	0.919099
ENSMUSG00000087380	2210408F21Rik	processed_transcript	6	RIKEN cDNA 2210408F21 gene	23.5148	0.563503	0.2869	1.97632	0.048119	0.136725
ENSMUSG00000071252	2210408I21Rik	protein_coding	13	Uncharacterized	136.183	0.00260893	0.136801	0.0189046	0.984917	0.992983
ENSMUSG00000032403	2300009A05Rik	protein_coding	9	Uncharacterized	92.8648	-0.161026	0.159391	-1.01109	0.311975	0.515335
ENSMUSG00000097354	2310001H17Rik	lincRNA	6	RIKEN cDNA 2310001H17 gene	25.1775	-0.958232	0.296414	-3.25002	0.00115395	0.00639918
ENSMUSG00000097178	2310002F09Rik	processed_transcript	7	RIKEN cDNA 2310002F09 gene	2.26951	0.00166022	0.362938	0.00492949	0.996067
ENSMUSG00000034159	2310007B03Rik	protein_coding	1	Uncharacterized	1.58344	0.254456	0.363491	0.911047	0.36227
ENSMUSG00000098332	2310009A05Rik	processed_transcript	9	RIKEN cDNA 2310009A05 gene	152.056	0.230482	0.126163	1.82876	0.0674355	0.176917
ENSMUSG00000079283	2310009B15Rik	protein_coding	1	RIKEN cDNA 2310009B15 gene	161.917	-0.0809674	0.119948	-0.674838	0.499779	0.689043
ENSMUSG00000097162	2310010J17Rik	bidirectional_promoter_lncRNA	7	RIKEN cDNA 2310010J17 gene	17.9848	-0.228623	0.314977	-0.734513	0.462636	0.657214
ENSMUSG00000020133	2310011J03Rik	protein_coding	10	UPF0449	893.423	0.114671	0.0581595	1.97165	0.0486498	0.137638
ENSMUSG00000085945	2310014F06Rik	bidirectional_promoter_lncRNA	7	RIKEN cDNA 2310014F06 gene	4.541	-0.328322	0.413192	-0.92814	0.353335
ENSMUSG00000097729	2310015A10Rik	processed_transcript	12	RIKEN cDNA 2310015A10 gene	64.4702	-0.272275	0.211831	-1.29749	0.194463	0.376609
ENSMUSG00000100410	2310020H05Rik	lincRNA	13	RIKEN cDNA 2310020H05 gene	5.95202	-0.160139	0.413137	-0.464265	0.642458	0.794662
ENSMUSG00000049643	2310022A10Rik	protein_coding	7	uncharacterized isoform 2	245.667	-0.195689	0.109436	-1.78843	0.0737061	0.188797
ENSMUSG00000031983	2310022B05Rik	protein_coding	8	Uncharacterized	967.79	-0.261009	0.0704547	-3.70674	0.000209947	0.00142631
ENSMUSG00000032062	2310030G06Rik	protein_coding	9	Uncharacterized	85.3414	0.0393777	0.168999	0.232981	0.815776	0.903902
ENSMUSG00000020441	2310033P09Rik	protein_coding	11	Multiple myeloma tumor-associated	213.549	0.00751529	0.10619	0.0707628	0.943587	0.971543
ENSMUSG00000099655	2310034G01Rik	protein_coding	19	RIKEN cDNA 2310034G01 gene	7.49338	0.197947	0.39048	0.519587	0.603352	0.767231
ENSMUSG00000026319	2310035C23Rik	protein_coding	1	KIAA1468	1531.27	-0.0313355	0.0524876	-0.597056	0.55047	0.726646
ENSMUSG00000062619	2310039H08Rik	protein_coding	17	Uncharacterized	139.832	-0.424243	0.130847	-3.24399	0.0011787	0.00651391
ENSMUSG00000101655	2310040G24Rik	lincRNA	6	RIKEN cDNA 2310040G24 gene	3.17909	0.513738	0.40987	1.35445	0.175593
ENSMUSG00000101746	2310043L19Rik	lincRNA	1	RIKEN cDNA 2310043L19 gene	38.6603	-1.61072	0.34239	-4.46875	7.86764e-06	7.35246e-05
ENSMUSG00000097768	2310043M15Rik	antisense	16	RIKEN cDNA 2310043M15 gene	107.721	-1.50408	0.347306	-3.8549	0.000115776	0.000838983
ENSMUSG00000108732	2310043P16Rik	TEC	7	RIKEN cDNA 2310043P16 gene	10.1969	-0.171937	0.359073	-0.48161	0.630083	0.786692
ENSMUSG00000100783	2310047D07Rik	lincRNA	5	RIKEN cDNA 2310047D07 gene	4.88821	-0.933248	0.407285	-2.12525	0.0335658
ENSMUSG00000040177	2310057M21Rik	protein_coding	7	Uncharacterized	193.862	0.0841263	0.112165	0.750031	0.453236	0.648499
ENSMUSG00000085379	2310058D17Rik	processed_transcript	11	RIKEN cDNA 2310058D17 gene	42.3334	-0.0831806	0.218006	-0.382757	0.7019	0.835515
ENSMUSG00000050705	2310061I04Rik	protein_coding	17	RIKEN cDNA 2310061I04 gene	39.0469	-0.237575	0.231989	-1.02497	0.305379	0.507606
ENSMUSG00000087410	2310065F04Rik	lincRNA	11	RIKEN cDNA 2310065F04 gene	4.98094	-0.113011	0.403917	-0.541978	0.587834
ENSMUSG00000100084	2310068J16Rik	antisense	15	RIKEN cDNA 2310068J16 gene	4.63673	-0.00189349	0.411784	-0.00457682	0.996348
ENSMUSG00000105858	2310074N15Rik	lincRNA	5	RIKEN cDNA 2310074N15 gene	2.77881	0.0043986	0.410572	0.0107796	0.991399
ENSMUSG00000045411	2410002F23Rik	protein_coding	7	RIKEN cDNA 2410002F23 gene	292.141	-0.0723705	0.0985257	-0.734467	0.462664	0.657214
ENSMUSG00000036873	2410004B18Rik	protein_coding	3	UPF0690	416.613	-0.0464792	0.0785747	-0.591444	0.554223	0.729105
ENSMUSG00000086841	2410006H16Rik	processed_transcript	11	RIKEN cDNA 2410006H16 gene	1334.17	0.0419107	0.0557495	0.751769	0.45219	0.647724
ENSMUSG00000099528	2410012E07Rik	lincRNA	14	RIKEN cDNA 2410012E07 gene	17.742	0.264619	0.295624	0.883981	0.376707	0.581036
ENSMUSG00000049760	2410015M20Rik	protein_coding	17	MICOS complex subunit MIC13	925.296	-0.176534	0.0690309	-2.55764	0.0105384	0.0406711
ENSMUSG00000100017	2410022M11Rik	bidirectional_promoter_lncRNA	14	RIKEN cDNA 2410022M11 gene	39.8943	-0.0644175	0.238466	-0.271395	0.786088	0.887433
ENSMUSG00000044387	2410080I02Rik	lincRNA	19	RIKEN cDNA 2410080I02 gene	1.23424	-0.297677	0.356958	-0.835866	0.403231
ENSMUSG00000039801	2410089E03Rik	protein_coding	15	Protein JBTS17	1557.13	0.121156	0.0784876	1.5436	0.122685	0.273814
ENSMUSG00000032840	2410131K14Rik	protein_coding	5	UPF0454	300.11	-0.0297687	0.0983895	-0.302868	0.76199	0.871875
ENSMUSG00000096917	2500002B13Rik	processed_transcript	8	RIKEN cDNA 2500002B13 gene	40.6606	-0.00576689	0.217862	-0.026411	0.97893	0.990737
ENSMUSG00000073236	2500004C02Rik	processed_transcript	2	RIKEN cDNA 2500004C02 gene	31.7901	-0.0208598	0.260454	-0.0802263	0.936057	0.966959
ENSMUSG00000071632	2510002D24Rik	protein_coding	16	UPF0545	134.697	0.218801	0.126668	1.72663	0.0842334	0.208307
ENSMUSG00000043391	2510009E07Rik	protein_coding	16	UPF0524	845.272	0.0621853	0.0649777	0.95724	0.338446	0.542939
ENSMUSG00000106825	2510016D11Rik	TEC	5	RIKEN cDNA 2510016D11 gene	49.4562	-0.977952	0.200889	-4.83011	1.36456e-06	1.46782e-05
ENSMUSG00000104891	2510017J16Rik	antisense	5	RIKEN cDNA 2510017J16 gene	2.68411	-0.422795	0.413692	-0.942613	0.345879
ENSMUSG00000044496	2510039O18Rik	protein_coding	4	Uncharacterized protein KIAA2013	1573.28	0.0144971	0.0678472	0.213666	0.830808	0.912286
ENSMUSG00000066175	2510046G10Rik	antisense	7	RIKEN cDNA 2510046G10 gene	5.23235	0.408826	0.408087	1.01073	0.312147
ENSMUSG00000039798	2600006K01Rik	antisense	2	RIKEN cDNA 2600006K01 gene	9.68271	0.122686	0.37206	0.336778	0.736284	0.856559
ENSMUSG00000103828	2610001A08Rik	TEC	11	RIKEN cDNA 2610001A08 gene	4.19346	0.20507	0.411118	0.469323	0.638839
ENSMUSG00000052419	2610001J05Rik	protein_coding	6	RIKEN cDNA 2610001J05 gene	741.056	-0.0600203	0.0732456	-0.819349	0.412587	0.613913
ENSMUSG00000031242	2610002M06Rik	protein_coding	X	Charged multivesicular body protein 1b-2	573.755	-0.0514891	0.068648	-0.749939	0.453292	0.648514
ENSMUSG00000071793	2610005L07Rik	transcribed_unprocessed_pseudogene	8	RIKEN cDNA 2610005L07 gene	19.695	-0.326368	0.300972	-1.087	0.277038	0.476462
ENSMUSG00000060301	2610008E11Rik	protein_coding	10	RIKEN cDNA 2610008E11 gene	1448.99	0.00126736	0.0589743	0.0214535	0.982884	0.992514
ENSMUSG00000101089	2610016A17Rik	lincRNA	19	RIKEN cDNA 2610016A17 gene	4.65128	-0.390493	0.404846	-0.937528	0.348487
ENSMUSG00000107909	2610017A05Rik	TEC	6	RIKEN cDNA 2610017A05 gene	2.97496	0.0431875	0.412118	0.0912831	0.927268
ENSMUSG00000097537	2610020C07Rik	antisense	16	RIKEN cDNA 2610020C07 gene	11.7962	0.503705	0.327721	1.50386	0.132619	0.288919
ENSMUSG00000091474	2610021A01Rik	protein_coding	7	RIKEN cDNA 2610021A01 gene	371.761	-0.109038	0.0875908	-1.24494	0.213154	0.400057
ENSMUSG00000110997	2610028D06Rik	TEC	9	RIKEN cDNA 2610028D06 gene	2.88352	0.497503	0.411899	1.17903	0.238385
ENSMUSG00000087259	2610035D17Rik	lincRNA	11	RIKEN cDNA 2610035D17 gene	10.2103	0.539413	0.345066	1.53401	0.125027	0.277276
ENSMUSG00000097536	2610037D02Rik	lincRNA	15	RIKEN cDNA 2610037D02 gene	74.2269	0.507203	0.198422	2.54746	0.0108512	0.0416778
ENSMUSG00000071302	2610044O15Rik8	protein_coding	8	RIKEN cDNA 2610044O15 gene	497.5	0.0190774	0.076438	0.249576	0.802916	0.897182
ENSMUSG00000074415	2610203C20Rik	processed_transcript	9	RIKEN cDNA 2610203C20 gene	88.739	0.35958	0.178068	2.01218	0.0442012	0.127931
ENSMUSG00000079671	2610203C22Rik	processed_transcript	1	RIKEN cDNA 2610203C22 gene	6.01659	0.568446	0.401416	1.45525	0.145601	0.307597
ENSMUSG00000085236	2610206C17Rik	antisense	7	RIKEN cDNA 2610206C17 gene	2.53066	0.194152	0.397088	0.606059	0.544475
ENSMUSG00000059482	2610301B20Rik	protein_coding	4	chromosome 8 open reading frame 37	596.836	0.0566412	0.0734887	0.770864	0.440788	0.637317
ENSMUSG00000100164	2610306M01Rik	bidirectional_promoter_lncRNA	6	RIKEN cDNA 2610306M01 gene	66.2989	-0.31237	0.181446	-1.72507	0.0845141	0.208823
ENSMUSG00000085936	2610307P16Rik	processed_transcript	13	RIKEN cDNA 2610307P16 gene	125.608	-0.106473	0.131889	-0.807157	0.419576	0.619605
ENSMUSG00000097040	2610316D01Rik	processed_transcript	3	RIKEN cDNA 2610316D01 gene	16.8496	-0.956726	0.308833	-3.06358	0.00218707	0.0110438
ENSMUSG00000049916	2610318N02Rik	protein_coding	16	RIKEN cDNA 2610318N02 gene	13.7518	0.395976	0.300662	1.28627	0.19835	0.382041
ENSMUSG00000010277	2610507B11Rik	protein_coding	11	Protein KIAA0100	5571.46	-0.135635	0.0440893	-3.07635	0.00209555	0.0106486
ENSMUSG00000092486	2610524H06Rik	protein_coding	5	RIKEN cDNA 2610524H06 gene	54.725	0.053265	0.196333	0.27113	0.786291	0.887547
ENSMUSG00000096001	2610528A11Rik	protein_coding	14	Protein GPR15L	5.73059	-0.419804	0.409416	-1.08761	0.276766	0.476334
ENSMUSG00000097334	2700012I20Rik	lincRNA	9	RIKEN cDNA 2700012I20 gene	5.30775	0.227951	0.411949	0.631648	0.527617
ENSMUSG00000097731	2700016F22Rik	lincRNA	4	RIKEN cDNA 2700016F22 gene	8.5491	0.218313	0.372655	0.579443	0.56229	0.735127
ENSMUSG00000106691	2700029L08Rik	TEC	5	RIKEN cDNA 2700029L08 gene	5.55797	0.399813	0.38821	0.964841	0.334625	0.538896
ENSMUSG00000086328	2700033N17Rik	lincRNA	2	RIKEN cDNA 2700033N17 gene	22.6873	0.541758	0.286267	1.8888	0.0589184	0.159853
ENSMUSG00000097180	2700038G22Rik	lincRNA	5	RIKEN cDNA 2700038G22 gene	10.1753	0.422581	0.334219	1.22247	0.22153	0.410406
ENSMUSG00000097787	2700046G09Rik	lincRNA	19	RIKEN cDNA 2700046G09 gene	16.3563	-0.203542	0.328584	-0.619586	0.53553	0.715211
ENSMUSG00000034601	2700049A03Rik	protein_coding	12	RIKEN cDNA 2700049A03 gene	676.644	0.128915	0.0724795	1.77839	0.0753397	0.192164
ENSMUSG00000024273	2700062C07Rik	protein_coding	18	UPF0711	258.064	0.072462	0.0987775	0.733337	0.463353	0.657831
ENSMUSG00000086224	2700069I18Rik	antisense	3	RIKEN cDNA 2700069I18 gene	8.84319	0.108212	0.390217	0.302783	0.762055	0.871875
ENSMUSG00000103722	2700078F05Rik	TEC	1	RIKEN cDNA 2700078F05 gene	3.01833	-0.552115	0.413558	-1.3474	0.177851
ENSMUSG00000053080	2700081O15Rik	protein_coding	19	Uncharacterized	1013.24	-0.0828627	0.0591429	-1.40125	0.16114	0.330158
ENSMUSG00000062198	2700097O09Rik	protein_coding	12	RIKEN cDNA 2700097O09 gene	160.837	-0.075245	0.120871	-0.621939	0.533982	0.714147
ENSMUSG00000098090	2700099C18Rik	transcribed_unprocessed_pseudogene	17	RIKEN cDNA 2700099C18 gene	195.119	0.0475639	0.0952582	0.49861	0.618054	0.777766
ENSMUSG00000087497	2810001G20Rik	antisense	11	RIKEN cDNA 2810001G20 gene	64.0315	0.232015	0.188324	1.23321	0.217499	0.405621
ENSMUSG00000045464	2810002D19Rik	processed_transcript	2	RIKEN cDNA 2810002D19 gene	57.1418	-0.295	0.199312	-1.47977	0.138935	0.298053
ENSMUSG00000031984	2810004N23Rik	protein_coding	8	Uncharacterized	995.899	-0.00103173	0.0593473	-0.017375	0.986137	0.993421
ENSMUSG00000047635	2810006K23Rik	protein_coding	5	Probable peptide chain release factor C12orf65 homolog, mitochondrial	186.622	0.176826	0.114903	1.53883	0.123846	0.275664
ENSMUSG00000099881	2810013P06Rik	bidirectional_promoter_lncRNA	8	RIKEN cDNA 2810013P06 gene	85.6914	0.124158	0.171307	0.726617	0.467461	0.661455
ENSMUSG00000020491	2810021J22Rik	protein_coding	11	RIKEN cDNA 2810021J22 gene	164.854	0.233655	0.123968	1.8865	0.0592282	0.160469
ENSMUSG00000049881	2810025M15Rik	transcribed_processed_pseudogene	1	RIKEN cDNA 2810025M15 gene	990.343	-0.0553156	0.0553331	-0.999547	0.31753	0.521084
ENSMUSG00000096995	2810029C07Rik	bidirectional_promoter_lncRNA	12	RIKEN cDNA 2810029C07 gene	7.9229	0.496372	0.375654	1.30417	0.192176	0.373376
ENSMUSG00000099338	2810030D12Rik	bidirectional_promoter_lncRNA	8	RIKEN cDNA 2810030D12 gene	8.45309	-0.195235	0.414188	-0.763714	0.445038	0.641275
ENSMUSG00000099034	2810039B14Rik	transcribed_unitary_pseudogene	15	RIKEN cDNA 2810039B14 gene	7.11427	-0.111958	0.394104	-0.285067	0.775593	0.880052
ENSMUSG00000099966	2810402E24Rik	antisense	14	RIKEN cDNA 2810402E24 gene	66.9769	-0.00757808	0.194435	-0.038991	0.968898	0.986029
ENSMUSG00000028060	2810403A07Rik	protein_coding	3	Protein BLOM7	1550.09	-0.0237308	0.0538645	-0.440582	0.659516	0.806106
ENSMUSG00000086629	2810403D21Rik	processed_transcript	X	RIKEN cDNA 2810403D21 gene	48.9278	0.301699	0.215694	1.40291	0.160645	0.329624
ENSMUSG00000101493	2810405F17Rik	lincRNA	4	RIKEN cDNA 2810405F17 gene	21.4842	0.505627	0.297796	1.68011	0.0929359	0.225006
ENSMUSG00000018570	2810408A11Rik	protein_coding	11	RIKEN cDNA 2810408A11 gene	127.73	0.0814727	0.135886	0.599061	0.549132	0.725971
ENSMUSG00000087213	2810408I11Rik	processed_transcript	1	RIKEN cDNA 2810408I11 gene	53.9186	0.137339	0.172371	0.792416	0.428118	0.626258
ENSMUSG00000075389	2810410L24Rik	processed_transcript	11	RIKEN cDNA 2810410L24 gene	22.625	0.109476	0.280219	0.389815	0.696674	0.83263
ENSMUSG00000100594	2810414N06Rik	lincRNA	1	RIKEN cDNA 2810414N06 gene	16.8036	0.29486	0.328691	0.911423	0.362073	0.567538
ENSMUSG00000097811	2810425M01Rik	lincRNA	10	RIKEN cDNA 2810425M01 gene	3.82642	-0.556856	0.414094	-1.3103	0.190094
ENSMUSG00000105981	2810428J06Rik	TEC	3	RIKEN cDNA 2810428J06 gene	2.14982	-0.105565	0.400545	-0.328276	0.742703
ENSMUSG00000085766	2810430I11Rik	processed_transcript	2	RIKEN cDNA 2810430I11 gene	21.1272	0.492675	0.291524	1.68388	0.0922041	0.223845
ENSMUSG00000086283	2810433D01Rik	lincRNA	11	RIKEN cDNA 2810433D01 gene	3.44286	-0.419412	0.405982	-1.51555	0.129634
ENSMUSG00000100876	2810454H06Rik	antisense	6	RIKEN cDNA 2810454H06 gene	34.6509	-0.0196932	0.237338	-0.0827316	0.934065	0.965866
ENSMUSG00000085030	2810455O05Rik	lincRNA	8	RIKEN cDNA 2810455O05 gene	13.5344	0.965259	0.335043	2.7945	0.00519799	0.0226757
ENSMUSG00000091475	2810468N07Rik	processed_transcript	17	RIKEN cDNA 2810468N07 gene	35.4826	-1.8281	0.254893	-6.93971	3.92917e-12	8.39055e-11
ENSMUSG00000032712	2810474O19Rik	protein_coding	6	RIKEN cDNA 2810474O19 gene	2432.9	-0.377475	0.0749133	-5.03961	4.6649e-07	5.33126e-06
ENSMUSG00000102014	2900009J06Rik	antisense	1	RIKEN cDNA 2900009J06 gene	7.5729	-0.325696	0.382561	-0.856909	0.391495	0.595498
ENSMUSG00000104244	2900018N21Rik	TEC	11	RIKEN cDNA 2900018N21 gene	2.5043	-0.180015	0.409956	-0.471994	0.636931
ENSMUSG00000051339	2900026A02Rik	protein_coding	5	Mus musculus RIKEN cDNA 2900026A02 (2900026A02Rik), transcript variant 1, mRNA.	603.01	-0.143501	0.0785241	-1.82862	0.0674561	0.176925
ENSMUSG00000054418	2900041M22Rik	processed_transcript	11	RIKEN cDNA 2900041M22 gene	18.765	0.309498	0.298547	1.03673	0.299861	0.502386
ENSMUSG00000043993	2900052L18Rik	processed_transcript	11	RIKEN cDNA 2900052L18 gene	15.9687	0.48728	0.310508	1.54668	0.121941	0.272472
ENSMUSG00000107722	2900060B14Rik	antisense	1	RIKEN cDNA 2900060B14 gene	6.47747	-0.509719	0.388401	-1.25111	0.210894	0.397976
ENSMUSG00000113621	2900060N12Rik	bidirectional_promoter_lncRNA	12	RIKEN cDNA 2900060N12 gene	5.80926	-0.680132	0.406485	-1.68339	0.0922989	0.223962
ENSMUSG00000106746	2900064F13Rik	TEC	5	RIKEN cDNA 2900064F13 gene	2.24731	0.67025	0.395205	1.72574	0.0843944
ENSMUSG00000097277	2900076A07Rik	lincRNA	7	RIKEN cDNA 2900076A07 gene	47.7125	-0.187704	0.205495	-0.913914	0.360762	0.566185
ENSMUSG00000087484	2900089D17Rik	antisense	5	RIKEN cDNA 2900089D17 gene	8.77209	0.157267	0.377221	0.428506	0.668282	0.812378
ENSMUSG00000099632	2900093K20Rik	antisense	2	RIKEN cDNA 2900093K20 gene	19.3384	-0.302895	0.298846	-1.01681	0.309241	0.511991
ENSMUSG00000102869	2900097C17Rik	lincRNA	2	RIKEN cDNA 2900097C17 gene	874.904	0.000131513	0.0680089	0.00185609	0.998519	0.999244
ENSMUSG00000070282	3000002C10Rik	transcribed_processed_pseudogene	9	RIKEN cDNA 3000002C10 gene	30.1789	-0.0275296	0.24726	-0.110942	0.911662	0.954098
ENSMUSG00000084885	3010001F23Rik	processed_transcript	X	RIKEN cDNA 3010001F23 gene	3.59254	0.060762	0.413264	0.140396	0.888347
ENSMUSG00000085355	3010003L21Rik	antisense	6	RIKEN cDNA 3010003L21 gene	15.1591	0.0311629	0.315872	0.0984971	0.921538	0.959597
ENSMUSG00000079737	3110001I22Rik	protein_coding	16	RIKEN cDNA 3110001I22 gene	91.7573	-0.165536	0.165975	-0.996372	0.319069	0.522577
ENSMUSG00000024410	3110002H16Rik	protein_coding	18	Uncharacterized	987.175	0.189272	0.0554538	3.41279	0.000643014	0.00383817
ENSMUSG00000026388	3110009E18Rik	protein_coding	1	UPF0538	64.4051	0.141378	0.172425	0.81853	0.413054	0.614113
ENSMUSG00000025102	3110040N11Rik	protein_coding	7	UPF0235	208.582	0.0747861	0.105857	0.706321	0.479988	0.672663
ENSMUSG00000028300	3110043O21Rik	protein_coding	4	Guanine nucleotide exchange C9orf72 homolog	700.701	0.0216248	0.0599165	0.360909	0.718167	0.845622
ENSMUSG00000097503	3110045C21Rik	antisense	1	RIKEN cDNA 3110045C21 gene	6.28236	-0.477507	0.390443	-1.18389	0.236455	0.429279
ENSMUSG00000085622	3110056K07Rik	processed_transcript	12	RIKEN cDNA 3110056K07 gene	57.5792	0.270826	0.193955	1.39473	0.163098	0.333178
ENSMUSG00000103634	3110062G12Rik	TEC	1	RIKEN cDNA 3110062G12 gene	11.4382	0.335672	0.331951	0.988619	0.322849	0.526501
ENSMUSG00000046806	3110062M04Rik	protein_coding	6	Cell cycle regulator of non-homologous end joining	201.209	-0.0131217	0.110672	-0.118341	0.905797	0.951541
ENSMUSG00000081187	3110067C02Rik	processed_pseudogene	X	RIKEN cDNA 3110067C02 gene	1.88066	0.365291	0.396777	0.770283	0.441132
ENSMUSG00000074635	3110070M22Rik	protein_coding	13	RIKEN cDNA 3110070M22 gene	3.68104	0.304345	0.414309	0.770123	0.441227
ENSMUSG00000103284	3110080O07Rik	TEC	3	RIKEN cDNA 3110080O07 gene	2.81782	-0.114596	0.41275	-0.250848	0.801932
ENSMUSG00000053553	3110082I17Rik	protein_coding	5	Uncharacterized	251.126	0.284319	0.0993914	2.85932	0.00424554	0.0191985
ENSMUSG00000097303	3110083C13Rik	bidirectional_promoter_lncRNA	14	RIKEN cDNA 3110083C13 gene	7.50753	0.287803	0.38275	0.759912	0.447307	0.643521
ENSMUSG00000073590	3222401L13Rik	lincRNA	18	RIKEN cDNA 3222401L13 gene	15.6779	0.00999528	0.330071	0.0299378	0.976117	0.98959
ENSMUSG00000063364	3300002I08Rik	protein_coding	2	RIKEN cDNA 3300002I08 gene	23.9213	-0.314098	0.278739	-1.12674	0.259851	0.457237
ENSMUSG00000107585	3300002P13Rik	lincRNA	7	RIKEN cDNA 3300002P13 gene	5.89554	-0.19766	0.413648	-0.74683	0.455166	0.650424
ENSMUSG00000096965	3300005D01Rik	lincRNA	17	RIKEN cDNA 3300005D01 gene	482.997	0.626727	0.0758306	8.26086	1.44623e-16	4.28446e-15
ENSMUSG00000071540	3425401B19Rik	protein_coding	14	RIKEN cDNA 3425401B19 gene	4.24855	0.00360063	0.404721	0.00518118	0.995866
ENSMUSG00000036242	3632451O06Rik	protein_coding	14	Uncharacterized	3.74419	-0.240357	0.399708	-1.11782	0.263643
ENSMUSG00000031125	3830403N18Rik	protein_coding	X	RIKEN cDNA 3830403N18 gene	1182.99	-0.00973755	0.0577917	-0.168482	0.866204	0.930988
ENSMUSG00000033111	3830406C13Rik	protein_coding	14	Uncharacterized	234.739	-0.0506254	0.104416	-0.48511	0.627598	0.784742
ENSMUSG00000071181	3830408C21Rik	processed_transcript	13	RIKEN cDNA 3830408C21 gene	11.7701	0.1251	0.341334	0.366347	0.714106	0.84351
ENSMUSG00000064202	4430402I18Rik	protein_coding	19	RIKEN cDNA 4430402I18 gene	2.03529	0.445713	0.390172	1.49965	0.133706
ENSMUSG00000042579	4632404H12Rik	lincRNA	3	RIKEN cDNA 4632404H12 gene	66.4164	0.282593	0.193471	1.46427	0.143119	0.303962
ENSMUSG00000106296	4632404M16Rik	sense_intronic	3	RIKEN cDNA 4632404M16 gene	8.31142	-0.727585	0.399138	-1.97247	0.048556	0.137535
ENSMUSG00000048106	4632415L05Rik	lincRNA	3	RIKEN cDNA 4632415L05 gene	298.519	0.0961716	0.103113	0.932971	0.350835	0.556059
ENSMUSG00000111605	4632418H02Rik	TEC	9	RIKEN cDNA 4632418H02 gene	3.4735	-0.33688	0.413418	-0.798007	0.424866
ENSMUSG00000074024	4632427E13Rik	bidirectional_promoter_lncRNA	7	RIKEN cDNA 4632427E13 gene	244.875	0.0979329	0.145882	0.670923	0.50227	0.690961
ENSMUSG00000097184	4632428C04Rik	lincRNA	16	RIKEN cDNA 4632428C04 gene	7.2655	0.0171986	0.389112	0.0435882	0.965233	0.983395
ENSMUSG00000105597	4633401B06Rik	TEC	3	RIKEN cDNA 4633401B06 gene	5.40842	0.186157	0.407899	0.447935	0.6542	0.802666
ENSMUSG00000086943	4732414G09Rik	lincRNA	11	RIKEN cDNA 4732414G09 gene	4.68736	-0.148245	0.403147	-0.348364	0.727567
ENSMUSG00000107402	4732416N19Rik	TEC	6	RIKEN cDNA 4732416N19 gene	35.6685	0.049365	0.247943	0.198884	0.842354	0.918514
ENSMUSG00000090031	4732440D04Rik	antisense	1	RIKEN cDNA 4732440D04 gene	49.667	0.117918	0.200509	0.586668	0.557427	0.73134
ENSMUSG00000101517	4732465J04Rik	lincRNA	10	RIKEN cDNA 4732465J04 gene	6.60152	0.000927664	0.413046	0.00147143	0.998826	0.999448
ENSMUSG00000053714	4732471J01Rik	antisense	7	RIKEN cDNA 4732471J01 gene	4.67578	0.381422	0.4087	0.944768	0.344777
ENSMUSG00000097350	4732491K20Rik	lincRNA	17	RIKEN cDNA 4732491K20 gene	65.6023	0.124441	0.18142	0.685706	0.492899	0.683664
ENSMUSG00000108456	4732496C06Rik	lincRNA	7	RIKEN cDNA 4732496C06 gene	5.36645	-0.102881	0.408521	-0.255711	0.798174	0.89423
ENSMUSG00000097236	4831440E17Rik	lincRNA	5	RIKEN cDNA 4831440E17 gene	1.88459	0.0912201	0.3997	0.218835	0.826779
ENSMUSG00000104018	4833412K13Rik	TEC	1	RIKEN cDNA 4833412K13 gene	6.5075	0.337774	0.380976	0.839586	0.40114	0.603464
ENSMUSG00000104950	4833413G10Rik	antisense	5	RIKEN cDNA 4833413G10 gene	25.0801	-0.0670799	0.270648	-0.249075	0.803303	0.897328
ENSMUSG00000086015	4833417C18Rik	processed_transcript	11	RIKEN cDNA 4833417C18 gene	5.83246	0.608814	0.39811	1.47602	0.13994	0.299631
ENSMUSG00000085287	4833418N02Rik	lincRNA	17	RIKEN cDNA 4833418N02 gene	48.101	0.136711	0.203667	0.671736	0.501752	0.69038
ENSMUSG00000062822	4833420G17Rik	protein_coding	13	Uncharacterized	261.48	0.128327	0.112288	1.14208	0.25342	0.449265
ENSMUSG00000074782	4833422C13Rik	antisense	13	RIKEN cDNA 4833422C13 gene	22.6574	-0.892704	0.344882	-2.68011	0.00735988	0.0302449
ENSMUSG00000032057	4833427G06Rik	protein_coding	9	UPF0722	25.8485	-0.246625	0.255436	-0.958654	0.337733	0.542271
ENSMUSG00000025871	4833439L19Rik	protein_coding	13	RIKEN cDNA 4833439L19 gene	1818.22	-0.0464805	0.0527123	-0.881899	0.377832	0.58216
ENSMUSG00000103103	4833445I07Rik	lincRNA	9	RIKEN cDNA 4833445I07 gene	22.4591	0.11524	0.282153	0.409759	0.681983	0.822754
ENSMUSG00000036934	4921524J17Rik	protein_coding	8	UPF0547	414.657	-0.217641	0.083091	-2.62	0.00879287	0.0351934
ENSMUSG00000113211	4921525O09Rik	processed_transcript	13	RIKEN cDNA 4921525O09 gene	27.1983	-0.959286	0.283693	-3.36192	0.000774022	0.00449832
ENSMUSG00000085704	4921531C22Rik	processed_transcript	2	RIKEN cDNA 4921531C22 gene	47.7674	-0.0411529	0.220865	-0.18733	0.851402	0.923731
ENSMUSG00000110910	4921534A09Rik	TEC	9	RIKEN cDNA 4921534A09 gene	4.26334	0.112641	0.410492	0.266921	0.78953
ENSMUSG00000020434	4921536K21Rik	protein_coding	11	Uncharacterized	6.77134	0.118298	0.381601	0.298962	0.764969	0.873069
ENSMUSG00000027309	4930402H24Rik	protein_coding	2	Uncharacterized	962.074	0.104129	0.0711542	1.46352	0.143325	0.304309
ENSMUSG00000020234	4930404N11Rik	protein_coding	10	Uncharacterized	5.02617	0.599496	0.408234	1.39931	0.16172
ENSMUSG00000086638	4930405A21Rik	processed_transcript	2	RIKEN cDNA 4930405A21 gene	5.31641	0.246408	0.40057	0.600965	0.547863
ENSMUSG00000090565	4930405O22Rik	sense_intronic	17	RIKEN cDNA 4930405O22 gene	2.28012	-0.516195	0.411194	-1.10871	0.267554
ENSMUSG00000085558	4930412C18Rik	processed_transcript	4	RIKEN cDNA 4930412C18 gene	10.8661	0.392848	0.35185	1.12071	0.26241	0.460163
ENSMUSG00000110289	4930412F12Rik	TEC	8	RIKEN cDNA 4930412F12 gene	7.08111	-0.392967	0.388418	-1.0045	0.315137	0.518502
ENSMUSG00000097323	4930426I24Rik	lincRNA	12	RIKEN cDNA 4930426I24 gene	5.49553	0.00115647	0.39009	0.00317417	0.997467	0.998695
ENSMUSG00000026736	4930426L09Rik	protein_coding	2	RIKEN cDNA 4930426L09 gene	8.53758	-0.0372953	0.374226	-0.102013	0.918746	0.958114
ENSMUSG00000086918	4930429F24Rik	lincRNA	9	RIKEN cDNA 4930429F24 gene	2.09349	0.175549	0.401385	0.424022	0.67155
ENSMUSG00000046567	4930430F08Rik	protein_coding	10	Uncharacterized	706.577	0.098029	0.0681417	1.43853	0.150284	0.314832
ENSMUSG00000109147	4930431P19Rik	transcribed_processed_pseudogene	7	RIKEN cDNA 4930431P19 gene	16.8031	0.409832	0.315385	1.30223	0.192837	0.374308
ENSMUSG00000008129	4930432K21Rik	protein_coding	8		12.7252	-0.0316703	0.334065	-0.0944068	0.924786	0.961471
ENSMUSG00000069873	4930438A08Rik	protein_coding	11	RIKEN cDNA 4930438A08 gene	4.06533	0.714763	0.40949	2.63083	0.00851754
ENSMUSG00000086969	4930443O20Rik	processed_transcript	2	RIKEN cDNA 4930443O20 gene	2.83898	-0.503338	0.401705	-1.48743	0.136901
ENSMUSG00000102224	4930447F24Rik	processed_transcript	9	RIKEN cDNA 4930447F24 gene	7.69395	0.105459	0.388019	0.277327	0.781529	0.884559
ENSMUSG00000106583	4930447N08Rik	processed_transcript	3	RIKEN cDNA 4930447N08 gene	3.52497	-0.518001	0.41394	-1.27691	0.201635
ENSMUSG00000022543	4930451G09Rik	transcribed_unitary_pseudogene	16	RIKEN cDNA 4930451G09 gene	10.3246	-0.320427	0.365416	-0.881524	0.378034	0.58216
ENSMUSG00000021747	4930452B06Rik	protein_coding	14	Uncharacterized	3.77467	0.266342	0.412389	0.624981	0.531983
ENSMUSG00000059920	4930453N24Rik	protein_coding	16	Uncharacterized	932.512	0.000637901	0.056042	0.0113932	0.99091	0.995869
ENSMUSG00000087611	4930458D05Rik	antisense	5	RIKEN cDNA 4930458D05 gene	2.29934	0.0658546	0.399156	0.144562	0.885056
ENSMUSG00000112332	4930466K18Rik	TEC	10	RIKEN cDNA 4930466K18 gene	18.3906	-0.417832	0.305215	-1.37773	0.168286	0.341174
ENSMUSG00000097516	4930467D21Rik	lincRNA	5	RIKEN cDNA 4930467D21 gene	6.61264	-1.3003	0.384158	-3.10348	0.00191262	0.00985416
ENSMUSG00000112716	4930471E19Rik	lincRNA	10	RIKEN cDNA 4930471E19 gene	38.1097	-0.62412	0.210102	-2.92946	0.00339555	0.0159745
ENSMUSG00000097284	4930480K23Rik	lincRNA	14	RIKEN cDNA 4930480K23 gene	21.1714	-0.424827	0.297725	-1.43399	0.151575	0.316664
ENSMUSG00000085956	4930481B07Rik	processed_transcript	3	RIKEN cDNA 4930481B07 gene	6.07213	-0.0968398	0.394261	-0.244868	0.806559	0.899519
ENSMUSG00000090202	4930503B20Rik	protein_coding	3	RIKEN cDNA 4930503B20 gene	5.18208	0.993771	0.404534	2.17151	0.0298925
ENSMUSG00000044906	4930503L19Rik	protein_coding	18	RIKEN cDNA 4930503L19 gene	651.359	0.0535617	0.0647607	0.826865	0.408314	0.610317
ENSMUSG00000097129	4930507D05Rik	protein_coding	10	RIKEN cDNA 4930507D05 gene	3.80329	0.554056	0.413454	1.34333	0.179165
ENSMUSG00000105659	4930509H03Rik	sense_intronic	3	RIKEN cDNA 4930509H03 gene	8.01748	0.130303	0.380083	0.346045	0.729309	0.852844
ENSMUSG00000086866	4930512H18Rik	antisense	8	RIKEN cDNA 4930512H18 gene	14.8089	-0.770463	0.387466	-2.26486	0.0235212	0.07801
ENSMUSG00000074136	4930513N10Rik	antisense	8	RIKEN cDNA 4930513N10 gene	5.73414	-0.166415	0.402761	-0.417038	0.676651	0.818743
ENSMUSG00000092183	4930515G01Rik	antisense	5	RIKEN cDNA 4930515G01 gene	12.582	0.449204	0.344495	1.30442	0.192091	0.373361
ENSMUSG00000074629	4930518I15Rik	protein_coding	2	RIKEN cDNA 4930518I15 gene	9.5695	0.600638	0.379329	1.55133	0.120823	0.27077
ENSMUSG00000074039	4930520O04Rik	processed_transcript	9	RIKEN cDNA 4930520O04 gene	1.65532	0.811289	0.380897	2.12813	0.033326
ENSMUSG00000072762	4930522L14Rik	protein_coding	5	RIKEN cDNA 4930522L14 gene	203.504	0.04478	0.103399	0.432867	0.665111	0.809932
ENSMUSG00000090394	4930523C07Rik	protein_coding	1	RIKEN cDNA 4930523C07 gene	109.531	0.13458	0.150304	0.894657	0.37097	0.575133
ENSMUSG00000035364	4930524J08Rik	protein_coding	5	RIKEN cDNA 4930524J08 gene	3.90029	0.0498544	0.414224	0.118945	0.905319
ENSMUSG00000090207	4930524O07Rik	antisense	9	RIKEN cDNA 4930524O07 gene	6.40067	-0.126938	0.395669	-0.309302	0.757092	0.868604
ENSMUSG00000085521	4930526A20Rik	transcribed_processed_pseudogene	17	RIKEN cDNA 4930526A20 gene	2.42492	-0.720193	0.405171	-1.81225	0.0699481
ENSMUSG00000097261	4930532G15Rik	lincRNA	1	RIKEN cDNA 4930532G15 gene	5.026	0.104057	0.401826	0.250655	0.802081
ENSMUSG00000105350	4930537H20Rik	antisense	3	RIKEN cDNA 4930537H20 gene	4.66315	-0.380304	0.407797	-0.91747	0.358896
ENSMUSG00000097032	4930539J05Rik	antisense	3	RIKEN cDNA 4930539J05 gene	12.0249	0.0608242	0.340505	0.177349	0.859235	0.92805
ENSMUSG00000097071	4930544I03Rik	lincRNA	12	RIKEN cDNA 4930544I03 gene	1.04531	1.54603e-05	0.130159	0.00168295	0.998657
ENSMUSG00000029138	4930548H24Rik	protein_coding	5	RIKEN cDNA 4930548H24 gene	1.56429	0.101531	0.363089	0.314812	0.752904
ENSMUSG00000046180	4930550L24Rik	protein_coding	X	RIKEN cDNA 4930550L24 gene	27.9987	0.376433	0.263128	1.43184	0.152191	0.317446
ENSMUSG00000106157	4930555A03Rik	lincRNA	3	RIKEN cDNA 4930555A03 gene	4.93806	-0.485132	0.409289	-1.19335	0.232734
ENSMUSG00000096971	4930556M19Rik	processed_transcript	15	RIKEN cDNA 4930556M19 gene	26.1973	0.0513857	0.26315	0.1948	0.84555	0.920283
ENSMUSG00000097519	4930558J18Rik	lincRNA	1	RIKEN cDNA 4930558J18 gene	17.8171	0.299052	0.283036	1.02993	0.303041	0.505664
ENSMUSG00000053574	4930563E22Rik	processed_transcript	11		26.0069	-0.131788	0.28028	-0.468766	0.639237	0.792645
ENSMUSG00000087440	4930577N17Rik	TEC	3	RIKEN cDNA 4930577N17 gene	21.2734	-0.0561424	0.303045	-0.18793	0.850931	0.92329
ENSMUSG00000097587	4930578M01Rik	lincRNA	15	RIKEN cDNA 4930578M01 gene	13.5756	0.0445455	0.336253	0.131233	0.895591	0.946367
ENSMUSG00000027811	4930579G24Rik	protein_coding	3	Uncharacterized	311.093	0.034896	0.0859366	0.405886	0.684826	0.824632
ENSMUSG00000051074	4930579K19Rik	processed_transcript	9	RIKEN cDNA 4930579K19 gene	6.59594	0.100435	0.389131	0.260424	0.794537	0.892442
ENSMUSG00000070315	4930581F22Rik	processed_transcript	9	RIKEN cDNA 4930581F22 gene	73.5064	-0.0636552	0.183382	-0.34643	0.729019	0.852844
ENSMUSG00000107195	4930589O11Rik	TEC	5	RIKEN cDNA 4930589O11 gene	6.36707	-0.0388393	0.400469	-0.0962365	0.923333	0.960609
ENSMUSG00000034063	4930590J08Rik	protein_coding	6	Uncharacterized	6.62884	0.425739	0.38959	1.08091	0.279736	0.479392
ENSMUSG00000075463	4930594M22Rik	processed_transcript	14	RIKEN cDNA 4930594M22 gene	5.30228	0.777034	0.406304	1.91729	0.0552012
ENSMUSG00000031938	4931406C07Rik	protein_coding	9	Ester hydrolase C11orf54 homolog	557.26	-0.0560215	0.0870855	-0.64356	0.519861	0.70478
ENSMUSG00000066571	4931406P16Rik	protein_coding	7	RIKEN cDNA 4931406P16 gene	1352.51	-0.27849	0.0565874	-4.92223	8.5562e-07	9.43531e-06
ENSMUSG00000022179	4931414P19Rik	protein_coding	14	Uncharacterized	110.003	-0.271193	0.14141	-1.91839	0.055061	0.151802
ENSMUSG00000054910	4931415C17Rik	processed_transcript	8	RIKEN cDNA 4931415C17 gene	4.58611	0.636379	0.409166	1.56004	0.118751
ENSMUSG00000014837	4931428F04Rik	protein_coding	8	Uncharacterized protein KIAA0895-like	102.233	-0.282061	0.156566	-1.79947	0.0719443	0.185765
ENSMUSG00000055061	4931431C16Rik	antisense	5	RIKEN cDNA 4931431C16 gene	2.67296	-0.0883062	0.408957	-0.244672	0.80671
ENSMUSG00000074580	4931440P22Rik	transcribed_processed_pseudogene	3	RIKEN cDNA 4931440P22 gene	10.7616	-0.203464	0.370031	-0.552811	0.580393	0.74904
ENSMUSG00000105881	4932422M17Rik	lincRNA	5	RIKEN cDNA 4932422M17 gene	22.5293	0.128556	0.28239	0.451276	0.651791	0.800998
ENSMUSG00000037270	4932438A13Rik	protein_coding	3	Uncharacterized protein KIAA1109	2137.56	8.62488e-05	0.11911	0.000706619	0.999436	0.999711
ENSMUSG00000097216	4932441J04Rik	processed_transcript	5	RIKEN cDNA 4932441J04 gene	11.0432	-0.198698	0.364519	-0.567276	0.570526	0.741495
ENSMUSG00000097908	4933404O12Rik	lincRNA	5	RIKEN cDNA 4933404O12 gene	78.9074	0.0856123	0.169024	0.505611	0.61313	0.774488
ENSMUSG00000097494	4933406C10Rik	lincRNA	12	RIKEN cDNA 4933406C10 gene	5.10132	0.290547	0.409835	0.771889	0.44018
ENSMUSG00000087475	4933406I18Rik	lincRNA	7	RIKEN cDNA 4933406I18 gene	3.39744	0.270976	0.414356	0.640789	0.52166
ENSMUSG00000069713	4933406P04Rik	lincRNA	10	RIKEN cDNA 4933406P04 gene	20.8294	-0.273124	0.305866	-0.899437	0.36842	0.572961
ENSMUSG00000087396	4933407K13Rik	processed_transcript	X	RIKEN cDNA 4933407K13 gene	73.5779	-0.147856	0.179309	-0.823091	0.410456	0.61238
ENSMUSG00000049357	4933408B17Rik	protein_coding	18	RIKEN cDNA 4933408B17 gene	6.21045	0.162866	0.3861	0.402993	0.686953	0.825794
ENSMUSG00000090369	4933411K16Rik	protein_coding	19	Uncharacterized	6.62913	0.0542769	0.397482	0.140819	0.888013	0.942373
ENSMUSG00000112627	4933412E12Rik	bidirectional_promoter_lncRNA	10	RIKEN cDNA 4933412E12 gene	64.8032	0.214118	0.183036	1.16944	0.242226	0.436078
ENSMUSG00000103006	4933417C20Rik	TEC	1	RIKEN cDNA 4933417C20 gene	15.5139	0.246321	0.332329	0.733037	0.463536	0.657961
ENSMUSG00000101848	4933417E11Rik	lincRNA	1	RIKEN cDNA 4933417E11 gene	3.60848	0.338601	0.414165	0.807943	0.419123
ENSMUSG00000086443	4933421A08Rik	processed_transcript	4	RIKEN cDNA 4933421A08 gene	1.84572	-0.737748	0.392137	-1.73799	0.0822128
ENSMUSG00000085037	4933421O10Rik	processed_transcript	4	RIKEN cDNA 4933421O10 gene	34.2311	0.250585	0.235067	1.06414	0.287264	0.488299
ENSMUSG00000102416	4933424G06Rik	protein_coding	1	RIKEN cDNA 4933424G06 gene	1.73349	0.635403	0.396446	1.47257	0.140867
ENSMUSG00000107164	4933425D22Rik	sense_intronic	5	RIKEN cDNA 4933425D22 gene	15.9391	-0.542098	0.317879	-1.68649	0.0917008	0.22281
ENSMUSG00000106508	4933425M03Rik	TEC	3	RIKEN cDNA 4933425M03 gene	3.67577	-0.491061	0.414064	-1.1397	0.25441
ENSMUSG00000020807	4933427D14Rik	protein_coding	11	KIAA0753	517.548	0.0471401	0.0780983	0.603538	0.546151	0.72412
ENSMUSG00000044276	4933427E11Rik	antisense	15	RIKEN cDNA 4933427E11 gene	3.4237	-0.414723	0.412962	-1.13497	0.256388
ENSMUSG00000097786	4933429H19Rik	antisense	3	RIKEN cDNA 4933429H19 gene	2.69548	0.0974483	0.410313	0.242225	0.808606
ENSMUSG00000058046	4933430I17Rik	protein_coding	4	RIKEN cDNA 4933430I17 gene	5.94171	0.555091	0.399087	1.34803	0.17765	0.35454
ENSMUSG00000086968	4933431E20Rik	antisense	3	RIKEN cDNA 4933431E20 gene	114.719	0.425495	0.141264	3.01289	0.00258773	0.0127161
ENSMUSG00000103715	4933431K14Rik	TEC	9	RIKEN cDNA 4933431K14 gene	14.5412	-0.00312321	0.32193	-0.00970518	0.992257	0.996454
ENSMUSG00000097021	4933433G15Rik	lincRNA	9	RIKEN cDNA 4933433G15 gene	5.29641	0.12753	0.406191	0.305847	0.759721
ENSMUSG00000027942	4933434E20Rik	protein_coding	3	Uncharacterized	889.503	0.0140029	0.0620602	0.225636	0.821484	0.907272
ENSMUSG00000104719	4933437G19Rik	TEC	5	RIKEN cDNA 4933437G19 gene	5.60177	-0.359201	0.397618	-0.86943	0.384612	0.588707
ENSMUSG00000072893	4933439C10Rik	processed_transcript	11	RIKEN cDNA 4933439C10 gene	67.7969	0.678481	0.207448	3.25496	0.00113408	0.00630105
ENSMUSG00000042087	4933440N22Rik	TEC	6	RIKEN cDNA 4933440N22 gene	26.1618	-0.210207	0.270664	-0.784231	0.432904	0.630008
ENSMUSG00000097282	5031415H12Rik	lincRNA	17	RIKEN cDNA 5031415H12 gene	10.616	-0.129702	0.363941	-0.347814	0.72798	0.852248
ENSMUSG00000073147	5031425E22Rik	lincRNA	5	RIKEN cDNA 5031425E22 gene	191.573	0.0453911	0.117928	0.384875	0.70033	0.834542
ENSMUSG00000097885	5031434O11Rik	processed_transcript	3	RIKEN cDNA 5031434O11 gene	13.698	0.183182	0.342486	0.54837	0.583438	0.751025
ENSMUSG00000036046	5031439G07Rik	protein_coding	15	Uncharacterized	4401.93	0.0751592	0.053405	1.40735	0.159323	0.327831
ENSMUSG00000096932	5033403F01Rik	antisense	13	RIKEN cDNA 5033403F01 gene	6.80732	-0.0888894	0.386337	-0.228039	0.819616	0.90604
ENSMUSG00000113769	5033406O09Rik	lincRNA	12	RIKEN cDNA 5033406O09 gene	8.90329	0.188091	0.353295	0.507275	0.611962	0.773622
ENSMUSG00000097251	5033417F24Rik	antisense	1	RIKEN cDNA 5033417F24 gene	13.7597	0.0849584	0.331854	0.255815	0.798094	0.89423
ENSMUSG00000112276	5033421B08Rik	antisense	12	RIKEN cDNA 5033421B08 gene	9.55431	-0.255672	0.37047	-0.704378	0.481197	0.673552
ENSMUSG00000038152	5033430I15Rik	lincRNA	13	RIKEN cDNA 5033430I15 gene	25.419	0.104808	0.276132	0.37963	0.70422	0.836984
ENSMUSG00000104030	5330406M23Rik	TEC	6	RIKEN cDNA 5330406M23 gene	12.3341	0.427575	0.338828	1.21301	0.225128	0.414944
ENSMUSG00000087455	5330411J11Rik	processed_transcript	2	RIKEN cDNA 5330411J11 gene	2.65901	-0.473623	0.386247	-1.85583	0.063478
ENSMUSG00000114282	5330431K02Rik	TEC	13	RIKEN cDNA 5330431K02 gene	8.67349	0.684105	0.365339	1.7973	0.0722881	0.186264
ENSMUSG00000087620	5330434G04Rik	lincRNA	X	RIKEN cDNA 5330434G04 gene	1.92836	-0.236195	0.389552	-0.935067	0.349754
ENSMUSG00000052291	5330438D12Rik	processed_transcript	10	RIKEN cDNA 5330438D12 gene	19.6811	0.0251461	0.301258	0.0840765	0.932996	0.965458
ENSMUSG00000097827	5330439K02Rik	bidirectional_promoter_lncRNA	15	RIKEN cDNA 5330439K02 gene	2.93071	-0.0949829	0.412269	-0.263781	0.791949
ENSMUSG00000097699	5430400D12Rik	bidirectional_promoter_lncRNA	7	RIKEN cDNA 5430400D12 gene	2.62575	0.280584	0.412515	0.624509	0.532293
ENSMUSG00000072763	5430403G16Rik	protein_coding	5	RIKEN cDNA 5430403G16 gene	57.0894	0.317686	0.187384	1.69491	0.0900932	0.219709
ENSMUSG00000085741	5430405H02Rik	processed_transcript	2	RIKEN cDNA 5430405H02 gene	40.7806	0.343699	0.219218	1.56642	0.11725	0.265146
ENSMUSG00000114419	5430414B19Rik	sense_intronic	14	RIKEN cDNA 5430414B19 gene	12.7037	0.380796	0.349779	1.1183	0.263438	0.461191
ENSMUSG00000097772	5430416N02Rik	lincRNA	5	RIKEN cDNA 5430416N02 gene	165.495	0.0740996	0.118515	0.624369	0.532386	0.713384
ENSMUSG00000006204	5430419D17Rik	protein_coding	7	Putative DMBT1-like protein	9.94468	-0.0580695	0.345596	-0.162555	0.870868	0.933158
ENSMUSG00000102808	5430420F09Rik	TEC	3	RIKEN cDNA 5430420F09 gene	3.33028	0.409916	0.413766	0.945582	0.344362
ENSMUSG00000114554	5430425K12Rik	lincRNA	13	RIKEN cDNA 5430425K12 gene	2.38863	-0.40737	0.410007	-0.869595	0.384522
ENSMUSG00000108322	5430431A17Rik	lincRNA	7	RIKEN cDNA 5430431A17 gene	19.7475	-0.973684	0.386755	-2.76995	0.00560654	0.0241422
ENSMUSG00000108780	5430434F05Rik	TEC	6	RIKEN cDNA 5430434F05 gene	3.98634	0.265283	0.413335	0.59778	0.549987
ENSMUSG00000087174	5530601H04Rik	processed_transcript	X	RIKEN cDNA 5530601H04 gene	330.898	-0.0421646	0.085992	-0.49043	0.62383	0.782127
ENSMUSG00000087424	5730405O15Rik	processed_transcript	X	RIKEN cDNA 5730405O15 gene	25.0618	0.0449493	0.269185	0.166872	0.867471	0.931575
ENSMUSG00000073755	5730409E04Rik	protein_coding	4	UPF0500	61.6826	0.593794	0.205284	2.9066	0.00365382	0.0170113
ENSMUSG00000081793	5730416F02Rik	processed_pseudogene	X	RIKEN cDNA 5730416F02 gene	91.4776	-0.131026	0.159321	-0.820035	0.412196	0.613583
ENSMUSG00000099364	5730419F03Rik	lincRNA	1	RIKEN cDNA 5730419F03 gene	16.3089	-1.09465	0.370981	-3.05169	0.00227558	0.0114031
ENSMUSG00000097766	5730420D15Rik	bidirectional_promoter_lncRNA	10	RIKEN cDNA 5730420D15 gene	2.83855	-0.373897	0.41188	-0.89907	0.368615
ENSMUSG00000097191	5730422E09Rik	lincRNA	5	RIKEN cDNA 5730422E09 gene	3.12639	-0.129921	0.414276	-0.291077	0.770993
ENSMUSG00000057181	5730455P16Rik	protein_coding	11	Protein Njmu-R1	1275.91	0.139979	0.0535973	2.61185	0.00900546	0.0358853
ENSMUSG00000029089	5730480H06Rik	protein_coding	5	RIKEN cDNA 5730480H06 gene	224.062	0.0948452	0.108092	0.87725	0.380351	0.584288
ENSMUSG00000041605	5730559C18Rik	protein_coding	1	innate immunity activator	50.8377	-0.294431	0.204118	-1.44289	0.149052	0.312705
ENSMUSG00000110148	5830408C22Rik	processed_transcript	8	RIKEN cDNA 5830408C22 gene	50.3854	-0.182024	0.201446	-0.898437	0.368953	0.573351
ENSMUSG00000054672	5830411N06Rik	protein_coding	7	RIKEN cDNA 5830411N06 gene	7.31701	-1.442	0.392272	-3.35056	0.000806495	0.00465449
ENSMUSG00000078684	5830417I10Rik	unprocessed_pseudogene	3	RIKEN cDNA 5830417I10 gene	81.7198	0.334855	0.175638	1.90494	0.0567881	0.155313
ENSMUSG00000097471	5830432E09Rik	antisense	7	RIKEN cDNA 5830432E09 gene	3.18809	-0.143554	0.409676	-0.389011	0.697268
ENSMUSG00000052658	5830454E08Rik	lincRNA	9	RIKEN cDNA 5830454E08 gene	6.23556	0.407387	0.400211	1.03716	0.299663	0.502171
ENSMUSG00000104830	5830487J09Rik	processed_transcript	5	RIKEN cDNA 5830487J09 gene	3.39337	-0.303778	0.413258	-0.676331	0.498831
ENSMUSG00000046463	5930403N24Rik	processed_transcript	10	RIKEN cDNA 5930403N24 gene	13.8812	0.163708	0.35102	0.475696	0.634291	0.789359
ENSMUSG00000103477	5930409G06Rik	TEC	3	RIKEN cDNA 5930409G06 gene	36.5979	-1.26593	0.253248	-4.95645	7.17929e-07	8.02715e-06
ENSMUSG00000107201	5930420M18Rik	TEC	5	RIKEN cDNA 5930420M18 gene	16.4484	-0.0614734	0.297719	-0.204171	0.83822	0.916432
ENSMUSG00000106951	5930430L01Rik	lincRNA	5	RIKEN cDNA 5930430L01 gene	152.519	-0.365105	0.12601	-2.8962	0.00377714	0.0174966
ENSMUSG00000114590	5930438M14Rik	lincRNA	13	RIKEN cDNA 5930438M14 gene	17.7502	-0.265183	0.409248	-0.939736	0.347353	0.552988
ENSMUSG00000066607	6030419C18Rik	protein_coding	9	UPF0583	450.977	-0.157956	0.0997102	-1.5859	0.112762	0.257697
ENSMUSG00000097760	6030442K20Rik	processed_transcript	1	RIKEN cDNA 6030442K20 gene	9.03299	0.140913	0.365715	0.381825	0.702591	0.836066
ENSMUSG00000097207	6030443J06Rik	lincRNA	5	RIKEN cDNA 6030443J06 gene	16.3117	0.378054	0.309819	1.20457	0.228371	0.418817
ENSMUSG00000066178	6030445D17Rik	protein_coding	4	RIKEN cDNA 6030445D17 gene	10.4188	0.544098	0.354724	1.52335	0.127671	0.281491
ENSMUSG00000022195	6030458C11Rik	protein_coding	15	Mus musculus RIKEN cDNA 6030458C11 (6030458C11Rik), transcript variant 3, mRNA.	769.984	0.234517	0.0760981	3.082	0.00205612	0.0104851
ENSMUSG00000103822	6030460B20Rik	TEC	1	RIKEN cDNA 6030460B20 gene	3.00896	0.19092	0.414399	0.419512	0.674842
ENSMUSG00000097577	6230400D17Rik	antisense	14	RIKEN cDNA 6230400D17 gene	19.5965	-0.263666	0.295502	-0.896782	0.369835	0.574032
ENSMUSG00000075585	6330403L08Rik	antisense	5	RIKEN cDNA 6330403L08 gene	101.787	-0.272892	0.153784	-1.77708	0.0755549	0.192505
ENSMUSG00000085227	6330418K02Rik	antisense	5	RIKEN cDNA 6330418K02 gene	38.0891	-0.0898701	0.231392	-0.387995	0.69802	0.833163
ENSMUSG00000110575	6330537M06Rik	TEC	8	RIKEN cDNA 6330537M06 gene	2.78856	0.174917	0.404367	0.452294	0.651057
ENSMUSG00000045327	6330549D23Rik	transcribed_processed_pseudogene	3	RIKEN cDNA 6330549D23 gene	5.40889	-0.000140843	0.39623	-0.000269587	0.999785	0.999785
ENSMUSG00000093424	6330562C20Rik	antisense	3	RIKEN cDNA 6330562C20 gene	16.0472	0.00836494	0.33814	0.0247587	0.980247	0.991287
ENSMUSG00000102555	6430511E19Rik	TEC	7	RIKEN cDNA 6430511E19 gene	44.9027	-0.0560644	0.224214	-0.249159	0.803238	0.897328
ENSMUSG00000031824	6430548M08Rik	protein_coding	8	Uncharacterized protein KIAA0513	695.285	-0.495176	0.0684561	-7.2332	4.71736e-13	1.08944e-11
ENSMUSG00000074646	6430550D23Rik	protein_coding	2	RIKEN cDNA 6430550D23 gene	7.26241	0.0982046	0.390938	0.257165	0.797051	0.894016
ENSMUSG00000037977	6430571L13Rik	protein_coding	9	Uncharacterized	7.3948	0.255021	0.383053	0.660423	0.508983	0.696287
ENSMUSG00000039620	6430573F11Rik	protein_coding	8	Probable tRNA methyltransferase 9-like protein	3.34589	-0.346691	0.414343	-0.722907	0.469737
ENSMUSG00000102545	6430573P05Rik	lincRNA	3	RIKEN cDNA 6430573P05 gene	4.7981	-0.697214	0.407088	-1.71087	0.0871056
ENSMUSG00000097583	6430590A07Rik	processed_transcript	3	RIKEN cDNA 6430590A07 gene	2.69337	0.0642062	0.411228	0.14962	0.881064
ENSMUSG00000110127	6430710M23Rik	TEC	8	RIKEN cDNA 6430710M23 gene	2.64246	0.402014	0.412545	0.956936	0.3386
ENSMUSG00000079499	6530402F18Rik	processed_transcript	2	RIKEN cDNA 6530402F18 gene	170.509	-0.0716114	0.112827	-0.634123	0.526001	0.709563
ENSMUSG00000097375	6720427I07Rik	lincRNA	13	RIKEN cDNA 6720427I07 gene	388.966	0.163953	0.2162	0.757185	0.448939	0.644806
ENSMUSG00000103432	6720464F23Rik	TEC	1	RIKEN cDNA 6720464F23 gene	2.33642	0.245999	0.402995	0.598085	0.549784
ENSMUSG00000106553	6720482G16Rik	TEC	3	RIKEN cDNA 6720482G16 gene	3.63118	-0.654641	0.412305	-1.43928	0.15007
ENSMUSG00000072066	6720489N17Rik	protein_coding	13	RIKEN cDNA 6720489N17 gene	75.3777	0.0595096	0.159	0.373091	0.709081	0.840337
ENSMUSG00000071796	6820431F20Rik	transcribed_unprocessed_pseudogene	8	RIKEN cDNA 6820431F20 gene	11.1068	-0.237055	0.356144	-0.67233	0.501373	0.690057
ENSMUSG00000073821	8030451A03Rik	processed_transcript	4	RIKEN cDNA 8030451A03 gene	28.377	-0.374624	0.230443	-1.59624	0.110435	0.254083
ENSMUSG00000047466	8030462N17Rik	protein_coding	18	chromosome 18 open reading frame 25	687.419	0.00803241	0.0652661	0.123081	0.902043	0.949737
ENSMUSG00000048489	8430408G22Rik	protein_coding	6	Protein DEPP1	60.3797	-0.803928	0.261566	-3.14798	0.00164404	0.00866807
ENSMUSG00000079069	8430423G03Rik	lincRNA	5	RIKEN cDNA 8430423G03 gene	5.7173	0.174644	0.385331	0.430794	0.666618	0.811084
ENSMUSG00000034587	8430429K09Rik	processed_transcript	11	RIKEN cDNA 8430429K09 gene	56.9503	0.276031	0.18319	1.50414	0.132545	0.288801
ENSMUSG00000041878	8430432A02Rik	antisense	1	RIKEN cDNA 8430432A02 gene	6.4411	-0.22302	0.400245	-0.583504	0.559554	0.73334
ENSMUSG00000097343	9030407P20Rik	processed_transcript	7	RIKEN cDNA 9030407P20 gene	37.623	0.274401	0.238916	1.15539	0.247931	0.442835
ENSMUSG00000045008	9030612E09Rik	protein_coding	10	RIKEN cDNA 9030612E09 gene	6.51976	0.494418	0.403039	1.31007	0.190172	0.371127
ENSMUSG00000073158	9030624G23Rik	protein_coding	12	RIKEN cDNA 9030624G23 gene	4.12964	0.520604	0.411203	1.20216	0.229301
ENSMUSG00000030982	9030624J02Rik	protein_coding	7	UPF0505	2082.06	0.0358549	0.0446426	0.803161	0.421882	0.621579
ENSMUSG00000054951	9130008F23Rik	protein_coding	17	RIKEN cDNA 9130008F23 gene	49.482	0.530267	0.190154	2.7754	0.00551331	0.0238498
ENSMUSG00000039901	9130011E15Rik	protein_coding	19	UPF0668	308.328	-0.0620592	0.100916	-0.615199	0.538424	0.717903
ENSMUSG00000055134	9130017K11Rik	processed_transcript	11	RIKEN cDNA 9130017K11 gene	3.89909	-0.737106	0.411706	-1.65167	0.0986014
ENSMUSG00000030823	9130019O22Rik	protein_coding	7	RIKEN cDNA 9130019O22 gene	53.3077	-0.098493	0.196993	-0.50041	0.616786	0.777108
ENSMUSG00000073067	9130019P16Rik	processed_transcript	6	RIKEN cDNA 9130019P16 gene	13.6499	-0.37058	0.346285	-1.10685	0.268359	0.466553
ENSMUSG00000062944	9130023H24Rik	protein_coding	7	RIKEN cDNA 9130023H24 gene	280.667	-0.0203395	0.0970803	-0.209667	0.833927	0.913913
ENSMUSG00000087022	9130024F11Rik	processed_transcript	1	RIKEN cDNA 9130024F11 gene	10.853	0.00704042	0.374334	0.0185484	0.985201	0.992983
ENSMUSG00000086474	9130204K15Rik	lincRNA	11	RIKEN cDNA 9130204K15 gene	5.66934	-0.431828	0.413727	-1.21659	0.223762	0.413409
ENSMUSG00000086513	9130208D14Rik	unprocessed_pseudogene	7	RIKEN cDNA 9130208D14 gene	2.9436	-1.1291	0.405668	-3.28361	0.00102486
ENSMUSG00000097386	9130213A22Rik	protein_coding	11	RIKEN cDNA 9130213A22 gene	4.72947	-0.125807	0.411258	-0.311822	0.755176
ENSMUSG00000090330	9130221H12Rik	antisense	7	RIKEN cDNA 9130221H12 gene	110.837	0.251155	0.152209	1.65196	0.0985436	0.235323
ENSMUSG00000054598	9130230L23Rik	protein_coding	5	RIKEN cDNA 9130230L23 gene	1.54046	0.081451	0.377279	0.187197	0.851506
ENSMUSG00000092626	9130230N09Rik	processed_transcript	11	RIKEN cDNA 9130230N09 gene	4.23748	-0.191409	0.412959	-0.458468	0.646616
ENSMUSG00000101892	9130401M01Rik	protein_coding	15	Uncharacterized	406.543	0.0042757	0.080438	0.053205	0.957569	0.97869
ENSMUSG00000105851	9130604C24Rik	lincRNA	5	RIKEN cDNA 9130604C24 gene	7.48409	-0.0342705	0.387681	-0.0864749	0.931089	0.964233
ENSMUSG00000097100	9230104M06Rik	antisense	12	RIKEN cDNA 9230104M06 gene	2.13672	0.0859312	0.40248	0.203521	0.838728
ENSMUSG00000053070	9230110C19Rik	protein_coding	9	RIKEN cDNA 9230110C19 gene	65.6384	0.0978729	0.19228	0.509073	0.610701	0.772771
ENSMUSG00000087624	9230111E07Rik	lincRNA	2	RIKEN cDNA 9230111E07 gene	2.71432	0.518847	0.411604	1.1269	0.259783
ENSMUSG00000070461	9230112E08Rik	sense_overlapping	2	RIKEN cDNA 9230112E08 gene	115.409	0.206014	0.151431	1.36235	0.173087	0.347641
ENSMUSG00000111761	9230112J17Rik	lincRNA	9	RIKEN cDNA 9230112J17 gene	3.07865	0.457105	0.411447	1.27351	0.202839
ENSMUSG00000097145	9230114K14Rik	processed_transcript	5	RIKEN cDNA 9230114K14 gene	80.2866	0.0117176	0.162564	0.0720728	0.942544	0.970815
ENSMUSG00000097403	9230116N13Rik	processed_transcript	1	RIKEN cDNA 9230116N13 gene	16.714	-0.187005	0.313351	-0.59578	0.551322	0.726967
ENSMUSG00000091050	9330020H09Rik	antisense	15	RIKEN cDNA 9330020H09 gene	38.7857	0.217466	0.219619	0.987542	0.323377	0.527005
ENSMUSG00000107879	9330102E08Rik	lincRNA	6	RIKEN cDNA 9330102E08 gene	18.1221	0.377954	0.340227	1.17669	0.23932	0.43281
ENSMUSG00000097842	9330104G04Rik	lincRNA	7	RIKEN cDNA 9330104G04 gene	6.80111	-0.0913728	0.390453	-0.239887	0.810418	0.901521
ENSMUSG00000103502	9330121J05Rik	antisense	3	RIKEN cDNA 9330121J05 gene	1.69723	-0.0685397	0.385039	-0.164844	0.869067
ENSMUSG00000097781	9330136K24Rik	lincRNA	17	RIKEN cDNA 9330136K24 gene	4.88933	-0.402693	0.405721	-0.995261	0.31961
ENSMUSG00000097061	9330151L19Rik	bidirectional_promoter_lncRNA	12	RIKEN cDNA 9330151L19 gene	44.838	-0.073402	0.215794	-0.339909	0.733925	0.85526
ENSMUSG00000056031	9330154J02Rik	processed_transcript	9	RIKEN cDNA 9330154J02 gene	31.3598	-0.0902742	0.259111	-0.349097	0.727016	0.851602
ENSMUSG00000004360	9330159F19Rik	protein_coding	10	RIKEN cDNA 9330159F19 gene	545.54	-0.164345	0.0756441	-2.1721	0.0298478	0.0944428
ENSMUSG00000097177	9330159M07Rik	processed_transcript	9	RIKEN cDNA 9330159M07 gene	27.8333	0.181326	0.250448	0.716891	0.473441	0.666311
ENSMUSG00000072809	9330160F10Rik	antisense	11	RIKEN cDNA 9330160F10 gene	10.3899	-0.0780594	0.374716	-0.217386	0.827907	0.91061
ENSMUSG00000055271	9330161L09Rik	protein_coding	12	RIKEN cDNA 9330161L09 gene	7.3261	1.01251	0.397541	2.60231	0.00925976	0.0366964
ENSMUSG00000086448	9330162012Rik	bidirectional_promoter_lncRNA	13	cDNA RIKEN 9330162012 gene	2.53947	-0.181276	0.404029	-0.515851	0.605959
ENSMUSG00000109536	9330162G02Rik	TEC	7	RIKEN cDNA 9330162G02 gene	15.4911	-0.102568	0.319825	-0.321355	0.747941	0.863037
ENSMUSG00000097194	9330175E14Rik	lincRNA	8	RIKEN cDNA 9330175E14 gene	1.50771	0.614821	0.386258	1.39238	0.163807
ENSMUSG00000059939	9430015G10Rik	protein_coding	4	RIKEN cDNA 9430015G10 gene	459.695	0.231136	0.0974874	2.36943	0.0178158	0.0623487
ENSMUSG00000107709	9430018G01Rik	antisense	6	RIKEN cDNA 9430018G01 gene	6.3742	0.305295	0.396664	0.771438	0.440448	0.637074
ENSMUSG00000113341	9430031K09Rik	TEC	12	RIKEN cDNA 9430031K09 gene	3.46532	0.454947	0.414183	1.05482	0.291509
ENSMUSG00000102964	9430034N14Rik	TEC	1	RIKEN cDNA 9430034N14 gene	15.5233	0.429984	0.311279	1.35871	0.17424	0.349328
ENSMUSG00000097073	9430037G07Rik	lincRNA	9	RIKEN cDNA 9430037G07 gene	13.9821	0.239859	0.31679	0.735964	0.461753	0.656591
ENSMUSG00000102246	9430037O13Rik	TEC	1	RIKEN cDNA 9430037O13 gene	2.95079	0.268074	0.414346	0.590955	0.554551
ENSMUSG00000040139	9430038I01Rik	protein_coding	7	RIKEN cDNA 9430038I01 gene	62.8343	-0.221462	0.191824	-1.15347	0.248718	0.443834
ENSMUSG00000100632	9430060I03Rik	antisense	1	RIKEN cDNA 9430060I03 gene	7.79171	0.0708941	0.383182	0.178967	0.857964	0.927371
ENSMUSG00000085479	9430073C21Rik	antisense	11	Riken cDNA 9430073C21 gene	9.5333	-0.960806	0.40946	-3.3112	0.000928969	0.00529787
ENSMUSG00000111088	9430081H08Rik	TEC	9	RIKEN cDNA 9430081H08 gene	5.74373	-0.111383	0.40313	-0.277495	0.7814	0.884559
ENSMUSG00000106164	9430085M18Rik	lincRNA	5	RIKEN cDNA 9430085M18 gene	15.2668	0.248443	0.325884	0.772647	0.439731	0.63642
ENSMUSG00000084808	9430091E24Rik	processed_transcript	8	RIKEN cDNA 9430091E24 gene	7.11191	0.274086	0.393612	0.72356	0.469336	0.663254
ENSMUSG00000102267	9530003O04Rik	TEC	16	RIKEN cDNA 9530003O04 gene	3.46175	0.149786	0.414337	0.365533	0.714714
ENSMUSG00000112150	9530018F02Rik	bidirectional_promoter_lncRNA	12	RIKEN cDNA 9530018F02 gene	17.5726	0.042165	0.315538	0.133817	0.893547	0.945197
ENSMUSG00000102373	9530018H14Rik	TEC	6	RIKEN cDNA 9530018H14 gene	6.86303	0.353881	0.405553	0.939902	0.347268	0.552913
ENSMUSG00000097462	9530026P05Rik	antisense	6	RIKEN cDNA 9530026P05 gene	9.4568	0.113805	0.413848	0.568491	0.569702	0.74134
ENSMUSG00000097858	9530052C20Rik	lincRNA	3	RIKEN cDNA 9530052C20 gene	8.36668	0.390163	0.376024	1.04589	0.295613	0.49775
ENSMUSG00000078776	9530053A07Rik	protein_coding	7	RIKEN cDNA 9530053A07 gene	7.40732	0.753468	0.372362	1.9151	0.0554801	0.152631
ENSMUSG00000045345	9530056K15Rik	TEC	5	RIKEN cDNA 9530056K15 gene	3.42522	0.128885	0.414047	0.301601	0.762957
ENSMUSG00000036275	9530068E07Rik	protein_coding	11	RIKEN cDNA 9530068E07 gene	5340.78	-0.10363	0.0371364	-2.79063	0.00526057	0.0229072
ENSMUSG00000036411	9530077C05Rik	protein_coding	9	Uncharacterized protein KIAA0895	63.3433	0.248931	0.193363	1.28328	0.199393	0.383328
ENSMUSG00000097006	9530082P21Rik	antisense	17	RIKEN cDNA 9530082P21 gene	54.3293	0.243282	0.201632	1.20901	0.22666	0.416687
ENSMUSG00000107742	9530085L11Rik	TEC	8	RIKEN cDNA 9530085L11 gene	17.7356	0.160155	0.293746	0.538388	0.590309	0.757075
ENSMUSG00000108076	9530086O07Rik	TEC	6	RIKEN cDNA 9530086O07 gene	4.1321	0.23672	0.412297	0.567901	0.570102
ENSMUSG00000106371	9530097N15Rik	sense_intronic	3	RIKEN cDNA 9530097N15 gene	2.74239	0.413995	0.412164	0.929584	0.352587
ENSMUSG00000103867	9630010A21Rik	TEC	1	RIKEN cDNA 9630010A21 gene	2.48758	0.00232283	0.41291	0.00575941	0.995405
ENSMUSG00000059027	9630013D21Rik	processed_transcript	4	RIKEN cDNA 9630013D21 gene	15.997	0.00618023	0.319533	0.0192382	0.984651	0.992962
ENSMUSG00000096052	9930004E17Rik	antisense	14	RIKEN cDNA 9930004E17 gene	2.29836	-0.445402	0.402963	-1.05229	0.292665
ENSMUSG00000044551	9930012K11Rik	protein_coding	14	Uncharacterized	339.116	0.153251	0.0875208	1.75185	0.0798	0.200255
ENSMUSG00000046138	9930021J03Rik	protein_coding	19	RIKEN cDNA 9930021J03 gene	601.594	-0.0529838	0.075126	-0.705451	0.48053	0.673161
ENSMUSG00000111131	9930024M15Rik	TEC	10	RIKEN cDNA 9930024M15 gene	4.41208	-0.0554672	0.408637	-0.131921	0.895047
ENSMUSG00000044730	9930104L06Rik	protein_coding	4	Mus musculus RIKEN cDNA 9930104L06 (9930104L06Rik), transcript variant 2, mRNA.	219.964	0.27143	0.114294	2.37516	0.0175414	0.0615823
ENSMUSG00000069893	9930111J21Rik1	protein_coding	11	RIKEN cDNA 9930111J21 gene 1	26.7084	0.317498	0.248687	1.26287	0.206634	0.392706
ENSMUSG00000069892	9930111J21Rik2	protein_coding	11	RIKEN cDNA 9930111J21 gene 2	52.038	0.279471	0.192283	1.4452	0.148402	0.311748
ENSMUSG00000108120	9930120I10Rik	TEC	6	RIKEN cDNA 9930120I10 gene	2.13778	0.587803	0.408083	1.31426	0.188757
ENSMUSG00000110357	A030001D20Rik	antisense	7	RIKEN cDNA A030001D20 gene	2.97678	0.00785179	0.410889	0.0177684	0.985824
ENSMUSG00000079144	A130010J15Rik	protein_coding	1	UPF0739	406.062	-0.176823	0.0802777	-2.2026	0.0276231	0.0885884
ENSMUSG00000112822	A130012E19Rik	TEC	10	RIKEN cDNA A130012E19 gene	20.1864	0.076856	0.274412	0.275932	0.7826	0.885023
ENSMUSG00000097944	A130014A01Rik	bidirectional_promoter_lncRNA	8	RIKEN cDNA A130014A01 gene	19.076	0.517861	0.298958	1.70655	0.0879052	0.215499
ENSMUSG00000102642	A130048G24Rik	TEC	1	RIKEN cDNA A130048G24 gene	2.24971	0.426508	0.405957	0.996977	0.318776
ENSMUSG00000097643	A130051J06Rik	antisense	15	RIKEN cDNA A130051J0 gene	9.91595	-0.0634443	0.364476	-0.17169	0.863681	0.930212
ENSMUSG00000096960	A230028O05Rik	lincRNA	16	RIKEN cDNA A230028O05 gene	8.19359	-0.0907011	0.3811	-0.238766	0.811287	0.902005
ENSMUSG00000038884	A230050P20Rik	protein_coding	9	Repressor of yield of DENV protein homolog	168.922	0.327911	0.129295	2.53837	0.011137	0.0425382
ENSMUSG00000092071	A230065N10Rik	antisense	7	RIKEN cDNA A230065N10 gene	1.92118	-0.553574	0.398966	-1.33809	0.180867
ENSMUSG00000086877	A230072C01Rik	processed_transcript	X	RIKEN cDNA A230072C01 gene	17.8038	0.210541	0.312387	0.67468	0.499879	0.68905
ENSMUSG00000097292	A230107N01Rik	antisense	13	RIKEN cDNA A230107N01 gene	7.05653	-0.0454614	0.388136	-0.120261	0.904277	0.950842
ENSMUSG00000097915	A330009N23Rik	antisense	15	RIKEN cDNA A330009N23 gene	9.92206	-0.063383	0.380085	-0.173515	0.862246	0.929567
ENSMUSG00000096929	A330023F24Rik	processed_transcript	1	RIKEN cDNA A330023F24 gene	28.7572	-0.125123	0.262202	-0.474469	0.635166	0.789764
ENSMUSG00000085615	A330035P11Rik	lincRNA	14	RIKEN cDNA A330035P11 gene	33.4955	0.361126	0.240915	1.5007	0.133434	0.290346
ENSMUSG00000097868	A330069E16Rik	lincRNA	2	RIKEN cDNA A330069E16 gene	12.8004	0.200483	0.332415	0.602241	0.547014	0.724757
ENSMUSG00000097960	A330074K22Rik	lincRNA	8	RIKEN cDNA A330074K22 gene	78.7325	-0.473137	0.178962	-2.64649	0.00813323	0.0329546
ENSMUSG00000097666	A330094K24Rik	lincRNA	18	RIKEN cDNA A330094K24 gene	2.30543	-0.184765	0.406	-0.471836	0.637044
ENSMUSG00000047613	A430005L14Rik	protein_coding	4	UPF0688	396.878	0.121502	0.0915504	1.32691	0.184537	0.364262
ENSMUSG00000097603	A430010J10Rik	processed_transcript	6	RIKEN cDNA A430010J10 gene	3.09902	0.196722	0.411853	0.562874	0.573521
ENSMUSG00000085315	A430018G15Rik	processed_transcript	2	RIKEN cDNA A430018G15 gene	5.06733	-0.0763282	0.413166	-0.19855	0.842615
ENSMUSG00000104432	A430027C01Rik	TEC	9	RIKEN cDNA A430027C01 gene	5.91568	-0.314181	0.390081	-0.753552	0.451119	0.646749
ENSMUSG00000056014	A430033K04Rik	protein_coding	5	RIKEN cDNA A430033K04 gene	217.586	0.105055	0.105478	0.996224	0.319141	0.522635
ENSMUSG00000087305	A430035B10Rik	processed_transcript	6	RIKEN cDNA A430035B10 gene	14.8938	0.138024	0.330986	0.423661	0.671813	0.815141
ENSMUSG00000097353	A430046D13Rik	lincRNA	10	Riken cDNA A430046D13 gene	34.6581	-0.415358	0.254119	-1.63786	0.10145	0.240043
ENSMUSG00000090564	A430057M04Rik	antisense	14	RIKEN cDNA A430057M04 gene	5.44503	-0.0816159	0.397336	-0.190865	0.848631	0.922043
ENSMUSG00000085589	A430078I02Rik	antisense	6	RIKEN cDNA A430078I02 gene	23.8496	-1.05637	0.290435	-3.61748	0.000297485	0.0019478
ENSMUSG00000112096	A430103D13Rik	TEC	12	RIKEN cDNA A430103D13 gene	7.01658	0.546608	0.386963	1.38183	0.167025	0.339213
ENSMUSG00000045838	A430105I19Rik	protein_coding	2	Uncharacterized	2024.24	0.248853	0.051791	4.80491	1.54825e-06	1.64581e-05
ENSMUSG00000097784	A430105J06Rik	lincRNA	1	RIKEN cDNA A430105J06 gene	8.43548	0.34464	0.374092	0.911102	0.362242	0.567538
ENSMUSG00000098206	A430106G13Rik	lincRNA	1	RIKEN cDNA A430106G13 gene	3.7652	0.521066	0.413679	1.30051	0.193428
ENSMUSG00000086851	A430108G06Rik	processed_transcript	11	RIKEN cDNA A430108G06 gene	4.77814	-0.0035512	0.404655	-0.00872747	0.993037
ENSMUSG00000102415	A430110C17Rik	TEC	5	RIKEN cDNA A430110C17 gene	3.41172	0.353928	0.413617	0.80377	0.42153
ENSMUSG00000054135	A430110L20Rik	lincRNA	1	RIKEN cDNA A430110L20 gene	3.87728	0.61452	0.413303	1.477	0.139677
ENSMUSG00000047878	A4galt	protein_coding	15	alpha 1,4-galactosyltransferase	837.445	0.390499	0.0656484	5.94928	2.69319e-09	4.16868e-08
ENSMUSG00000006462	A530013C23Rik	lincRNA	2	RIKEN cDNA A530013C23 gene	9.26228	0.859133	0.369719	2.28553	0.0222819	0.0747746
ENSMUSG00000072847	A530017D24Rik	lincRNA	11	RIKEN cDNA A530017D24 gene	77.6915	0.0358856	0.170123	0.21103	0.832864	0.913218
ENSMUSG00000104973	A530041M06Rik	sense_intronic	3	RIKEN cDNA A530041M06 gene	7.51502	0.0111306	0.377743	0.0298379	0.976196	0.98959
ENSMUSG00000113338	A530046M15Rik	lincRNA	13	RIKEN cDNA A530046M15 gene	2.91997	0.578211	0.41412	1.20412	0.228542
ENSMUSG00000092201	A530058N18Rik	processed_transcript	2	RIKEN cDNA A530058N18 gene	1.77971	0.00145952	0.350273	0.00483604	0.996141
ENSMUSG00000104273	A530064N14Rik	TEC	9	RIKEN cDNA A530064N14 gene	10.0511	-0.351344	0.353657	-0.970188	0.331953	0.535966
ENSMUSG00000085112	A530072M11Rik	processed_transcript	4	RIKEN cDNA gene A530072M11	12.2413	-0.0600189	0.344713	-0.175867	0.860398	0.928752
ENSMUSG00000090863	A530084C06Rik	protein_coding	13	RIKEN cDNA A530084C06 gene	8.27555	0.302849	0.39436	0.83829	0.401868	0.604307
ENSMUSG00000086395	A630014C17Rik	antisense	11	RIKEN cDNA A630014C17 gene	2.49963	0.00963606	0.396895	0.0194894	0.984451
ENSMUSG00000095493	A630023A22Rik	protein_coding	14	RIKEN cDNA A630023A22 gene	4.10293	0.275146	0.414061	0.797293	0.425281
ENSMUSG00000086725	A630052C17Rik	processed_transcript	11	RIKEN cDNA A630052C17 gene	54.662	0.0311702	0.229507	0.136084	0.891755	0.944369
ENSMUSG00000101013	A630072M18Rik	antisense	5	RIKEN cDNA A630072M18 gene	72.8367	-0.095041	0.192178	-0.496831	0.619308	0.778619
ENSMUSG00000094613	A630076J17Rik	protein_coding	3	RIKEN cDNA A630076J17 gene	7.96017	-2.74077	0.392615	-5.39022	7.03719e-08	9.09175e-07
ENSMUSG00000084846	A730011C13Rik	antisense	3	RIKEN cDNA A730011C13 gene	7.31017	-0.348064	0.378333	-0.896362	0.370059	0.574152
ENSMUSG00000047384	A730013G03Rik	TEC	1	RIKEN cDNA A730013G03 gene	2.88239	-0.711843	0.403847	-2.56836	0.0102181
ENSMUSG00000085566	A730017L22Rik	processed_transcript	2	RIKEN cDNA A730017L22 gene	56.3933	0.274866	0.21049	1.31267	0.189295	0.370131
ENSMUSG00000097924	A730020E08Rik	bidirectional_promoter_lncRNA	6	RIKEN cDNA A730020E08 gene	3.75126	0.00303464	0.414304	0.0070332	0.994388
ENSMUSG00000045238	A730035I17Rik	antisense	5	RIKEN cDNA A730035I17 gene	19.8404	-0.383409	0.287436	-1.32682	0.184567	0.364266
ENSMUSG00000097756	A730056A06Rik	antisense	7	RIKEN cDNA A730056A06 gene	16.1753	-1.10188	0.38092	-3.00452	0.00266	0.0130089
ENSMUSG00000096923	A730071L15Rik	protein_coding	11	RIKEN cDNA A730071L15Rik gene	2.45444	0.00830764	0.406977	0.0200737	0.983985
ENSMUSG00000086693	A730081D07Rik	antisense	13	RIKEN cDNA A730081D07 gene	5.19654	-0.12747	0.406456	-0.324684	0.74542
ENSMUSG00000103529	A730089K16Rik	TEC	5	RIKEN cDNA A730089K16 gene	2.93498	0.664784	0.409941	1.69868	0.0893798
ENSMUSG00000090120	A730090N16Rik	antisense	3	RIKEN cDNA A730090N16 gene	1.69253	-0.538235	0.390269	-1.28738	0.197963
ENSMUSG00000113965	A730091E23Rik	TEC	13	RIKEN cDNA A730091E23 gene	8.72479	0.220316	0.370292	0.587696	0.556736	0.730773
ENSMUSG00000053181	A830005F24Rik	protein_coding	13	RIKEN cDNA A830005F24 gene	16.9101	0.154071	0.298715	0.513148	0.607847	0.770724
ENSMUSG00000097182	A830009L08Rik	lincRNA	13	RIKEN cDNA A830009L08 gene	4.99105	0.344543	0.409294	0.841302	0.400179
ENSMUSG00000094707	A830019P07Rik	lincRNA	19	RIKEN cDNA A830019P07 gene	18.2779	0.288488	0.318565	0.932435	0.351112	0.556258
ENSMUSG00000111329	A830035O19Rik	antisense	9	RIKEN cDNA A830035O19 gene	5.61295	-0.188356	0.406171	-0.490923	0.623481	0.781961
ENSMUSG00000087143	A830082K12Rik	antisense	13	RIKEN cDNA A830082K12 gene	96.1096	0.0516989	0.152976	0.337835	0.735488	0.85577
ENSMUSG00000112280	A830082N09Rik	processed_transcript	10	RIKEN cDNA A830082N09 gene	66.5105	-0.238935	0.183256	-1.30432	0.192125	0.373376
ENSMUSG00000087132	A930001C03Rik	processed_transcript	19	RIKEN cDNA A930001C03 gene	8.32178	0.142365	0.372844	0.371882	0.709981	0.840588
ENSMUSG00000045506	A930002H24Rik	protein_coding	17	RIKEN cDNA A930002H24 gene	7.8933	0.0469047	0.385334	0.122665	0.902372	0.949876
ENSMUSG00000075330	A930003A15Rik	protein_coding	16	RIKEN cDNA A930003A15 gene	133.977	-1.62745	0.163271	-9.90445	3.98152e-23	1.68306e-21
ENSMUSG00000054057	A930004D18Rik	protein_coding	2	RIKEN cDNA A930004D18 gene	102.559	0.196104	0.138295	1.41465	0.157171	0.324556
ENSMUSG00000102602	A930004J17Rik	TEC	4	RIKEN cDNA A930004J17 gene	117.733	0.00279762	0.147853	0.0192758	0.984621	0.992962
ENSMUSG00000054426	A930005H10Rik	processed_transcript	3	RIKEN cDNA A930005H10 gene	59.0753	0.024217	0.200679	0.120888	0.90378	0.950832
ENSMUSG00000084866	A930006K02Rik	processed_transcript	16	RIKEN cDNA A930006K02 gene	5.66517	0.330071	0.394176	0.809994	0.417944	0.618654
ENSMUSG00000097855	A930007I19Rik	lincRNA	19	RIKEN cDNA A930007I19 gene	4.16617	0.148976	0.41397	0.389113	0.697192
ENSMUSG00000054181	A930012O16Rik	processed_transcript	2	RIKEN cDNA A930012O16 gene	8.79131	0.222439	0.374494	0.586376	0.557623	0.731406
ENSMUSG00000092368	A930015D03Rik	antisense	17	RIKEN cDNA A930015D03 gene	81.5085	0.244301	0.164908	1.48279	0.138131	0.296726
ENSMUSG00000114526	A930015P04Rik	TEC	13	RIKEN cDNA A930015P04 gene	2.82424	0.418842	0.414212	0.885209	0.376044
ENSMUSG00000056735	A930024E05Rik	antisense	5	RIKEN cDNA A930024E05 gene	21.5174	0.38393	0.288093	1.33536	0.18176	0.360509
ENSMUSG00000097566	A930024N18Rik	lincRNA	17	RIKEN cDNA A930024N18 gene	1.76844	-0.115787	0.37786	-0.509028	0.610732
ENSMUSG00000096988	A930029G22Rik	lincRNA	17	RIKEN cDNA A930029G22 gene	2.96065	-0.061399	0.413807	-0.150643	0.880257
ENSMUSG00000090622	A930033H14Rik	protein_coding	10	RIKEN cDNA A930033H14 gene	78.2751	-0.228339	0.174093	-1.31214	0.189473	0.37038
ENSMUSG00000052241	A930035D04Rik	pseudogene	6	RIKEN cDNA A930035D04 gene	4.65939	0.0234392	0.41252	0.0568155	0.954692
ENSMUSG00000109408	A930037H05Rik	processed_transcript	11	RIKEN cDNA A930037H05 gene	22.3435	-0.0304276	0.283405	-0.10752	0.914377	0.955644
ENSMUSG00000097310	A930038B10Rik	lincRNA	14	RIKEN cDNA A930038B10 gene	14.3044	-0.847997	0.315891	-2.61405	0.00894771	0.0356945
ENSMUSG00000074357	AA386476	bidirectional_promoter_lncRNA	8	expressed sequence AA386476	11.7353	-0.0652164	0.354189	-0.179168	0.857806	0.9273
ENSMUSG00000083307	AA414768	processed_pseudogene	X	expressed sequence AA414768	111.734	0.317406	0.139321	2.27568	0.0228654	0.0762449
ENSMUSG00000093483	AA465934	processed_transcript	11	expressed sequence AA465934	112.56	0.0984825	0.149806	0.656884	0.511256	0.698009
ENSMUSG00000033213	AA467197	protein_coding	2	Normal mucosa of esophagus-specific 1 protein	28.3843	-1.02778	0.263441	-3.8626	0.000112187	0.000817894
ENSMUSG00000073867	AA474408	TEC	7	expressed sequence AA474408	8.19631	-0.420439	0.378262	-1.09694	0.272666	0.471975
ENSMUSG00000097345	AA543186	lincRNA	2	expressed sequence AA543186	10.4015	0.78763	0.369645	2.13797	0.032519	0.100843
ENSMUSG00000103149	AA914427	TEC	16	EST AA914427	18.3365	0.0187221	0.28772	0.0644358	0.948623	0.974553
ENSMUSG00000042510	AA986860	protein_coding	1	Specifically androgen-regulated protein	46.5461	0.44449	0.217651	2.04313	0.0410398	0.120518
ENSMUSG00000036678	Aaas	protein_coding	15	achalasia, adrenocortical insufficiency, alacrimia	769.595	0.232697	0.0601657	3.8661	0.000110589	0.000808694
ENSMUSG00000029482	Aacs	protein_coding	5	acetoacetyl-CoA synthetase	1645.1	0.131401	0.0521436	2.52006	0.0117335	0.0443962
ENSMUSG00000057228	Aadat	protein_coding	8	aminoadipate aminotransferase	2.94267	0.353113	0.41429	0.745414	0.456021
ENSMUSG00000021482	Aaed1	protein_coding	13	AhpC/TSA antioxidant enzyme domain containing 1	1534.03	-0.100656	0.0512848	-1.96273	0.0496774	0.140011
ENSMUSG00000037257	Aagab	protein_coding	9	alpha- and gamma-adaptin binding protein	1129.34	0.229725	0.058662	3.91622	8.99476e-05	0.000674117
ENSMUSG00000057230	Aak1	protein_coding	6	AP2 associated kinase 1	547.426	0.0487051	0.0891438	0.54637	0.584812	0.75199
ENSMUSG00000035642	Aamdc	protein_coding	7	adipogenesis associated Mth938 domain containing	695.046	-0.794187	0.0984926	-8.08002	6.47544e-16	1.82486e-14
ENSMUSG00000006299	Aamp	protein_coding	1	angio-associated migratory protein	3851.12	-0.0646931	0.0432257	-1.4967	0.134472	0.291812
ENSMUSG00000027628	Aar2	protein_coding	2	AAR2 splicing factor homolog	799.384	-0.156015	0.0670559	-2.32691	0.01997	0.068333
ENSMUSG00000031960	Aars	protein_coding	8	alanyl-tRNA synthetase	5424.62	0.201286	0.0442545	4.54826	5.40921e-06	5.22734e-05
ENSMUSG00000023938	Aars2	protein_coding	17	Alanine--tRNA ligase, mitochondrial	518.834	-0.0925679	0.0824304	-1.12283	0.261509	0.459094
ENSMUSG00000075528	Aarsd1	protein_coding	11	alanyl-tRNA synthetase domain containing 1	8.80607	-0.100918	0.36289	-0.265104	0.790929	0.890221
ENSMUSG00000055923	Aasdh	protein_coding	5	Acyl-CoA synthetase family member 4	316.633	0.196817	0.0892288	2.20541	0.0274257	0.0880899
ENSMUSG00000025894	Aasdhppt	protein_coding	9	L-aminoadipate-semialdehyde dehydrogenase-phosphopantetheinyl transferase	812.877	-0.0403389	0.0652446	-0.618308	0.536372	0.716071
ENSMUSG00000018697	Aatf	protein_coding	11	apoptosis antagonizing transcription factor	1408.97	0.0842975	0.0582109	1.44809	0.147591	0.310675
ENSMUSG00000025375	Aatk	protein_coding	11	apoptosis associated tyrosine kinase	12.8073	-0.615213	0.407849	-2.19752	0.0279836	0.0894845
ENSMUSG00000057191	AB124611	protein_coding	9	chromosome 19 open reading frame 38	7.68841	0.00998098	0.383442	0.0258253	0.979397	0.990962
ENSMUSG00000057880	Abat	protein_coding	16	4-aminobutyrate aminotransferase, mitochondrial	10.2319	0.000810526	0.372814	0.0019682	0.99843	0.999244
ENSMUSG00000015243	Abca1	protein_coding	4	ATP-binding cassette, sub-family A (ABC1), member 1	44.3543	-1.29738	0.274351	-4.75095	2.02462e-06	2.12563e-05
ENSMUSG00000004668	Abca13	protein_coding	11	ATP-binding cassette, sub-family A (ABC1), member 13	1.91831	0.567681	0.393028	1.47921	0.139085
ENSMUSG00000026944	Abca2	protein_coding	2	ATP-binding cassette, sub-family A (ABC1), member 2	439.056	0.212448	0.0979298	2.17084	0.029943	0.0946198
ENSMUSG00000024130	Abca3	protein_coding	17	ATP-binding cassette, sub-family A (ABC1), member 3	327.3	-0.179104	0.103123	-1.7391	0.0820179	0.204437
ENSMUSG00000028125	Abca4	protein_coding	3	ATP-binding cassette, sub-family A (ABC1), member 4	63.2929	-0.27484	0.195497	-1.41439	0.157248	0.324623
ENSMUSG00000018800	Abca5	protein_coding	11	ATP-binding cassette, sub-family A (ABC1), member 5	2239.97	-0.297183	0.0708125	-4.19708	2.70376e-05	0.000228052
ENSMUSG00000044749	Abca6	protein_coding	11	ATP-binding cassette, sub-family A (ABC1), member 6	5.87248	0.43074	0.408525	1.15991	0.246086	0.440578
ENSMUSG00000035722	Abca7	protein_coding	10	ATP-binding cassette, sub-family A (ABC1), member 7	2397.46	-0.118997	0.0629736	-1.88963	0.0588075	0.159628
ENSMUSG00000041828	Abca8a	protein_coding	11	ATP-binding cassette, sub-family A (ABC1), member 8a	27.4208	-1.30354	0.347823	-3.82197	0.000132391	0.00094471
ENSMUSG00000020620	Abca8b	protein_coding	11	ATP-binding cassette, sub-family A (ABC1), member 8b	252.162	0.81918	0.127156	6.45408	1.08877e-10	1.97001e-09
ENSMUSG00000041797	Abca9	protein_coding	11	ATP-binding cassette, sub-family A (ABC1), member 9	17.8874	-0.182894	0.383143	-0.570335	0.56845	0.740635
ENSMUSG00000031974	Abcb10	protein_coding	8	ATP-binding cassette, sub-family B (MDR/TAP), member 10	721.544	0.013358	0.0631385	0.21157	0.832442	0.913048
ENSMUSG00000040584	Abcb1a	protein_coding	5	Multidrug resistance protein 1A	2.85271	0.116201	0.404094	0.425502	0.670471
ENSMUSG00000028970	Abcb1b	protein_coding	5	ATP-binding cassette, sub-family B (MDR/TAP), member 1B	302.405	0.205334	0.0838873	2.44567	0.0144585	0.0525588
ENSMUSG00000026198	Abcb6	protein_coding	1	ATP-binding cassette, sub-family B (MDR/TAP), member 6	76.4492	0.128988	0.194942	0.661362	0.50838	0.695924
ENSMUSG00000031333	Abcb7	protein_coding	X	ATP-binding cassette, sub-family B (MDR/TAP), member 7	1031.62	-0.0497455	0.0626201	-0.794357	0.426988	0.625174
ENSMUSG00000028973	Abcb8	protein_coding	5	ATP-binding cassette, sub-family B (MDR/TAP), member 8	742.168	-0.34804	0.0633473	-5.49426	3.92362e-08	5.2088e-07
ENSMUSG00000029408	Abcb9	protein_coding	5	ATP-binding cassette, sub-family B (MDR/TAP), member 9	10.5311	0.649587	0.375897	1.79197	0.0731384	0.187826
ENSMUSG00000023088	Abcc1	protein_coding	16	ATP-binding cassette, sub-family C (CFTR/MRP), member 1	2778.44	0.411994	0.0584062	7.05362	1.74326e-12	3.86538e-11
ENSMUSG00000032842	Abcc10	protein_coding	17	Mus musculus ATP-binding cassette, sub-family C (CFTR/MRP), member 10 (Abcc10), transcript variant 3, mRNA.	76.9814	-0.299228	0.178578	-1.67928	0.0930974	0.225144
ENSMUSG00000036872	Abcc12	protein_coding	8	Multidrug resistance-associated protein 9	2.16339	0.0012308	0.402713	0.00291319	0.997676
ENSMUSG00000032849	Abcc4	protein_coding	14	ATP-binding cassette, sub-family C (CFTR/MRP), member 4	405.371	0.668349	0.0952297	7.01285	2.33517e-12	5.10735e-11
ENSMUSG00000022822	Abcc5	protein_coding	16	Multidrug resistance-associated protein 5	1779.93	0.333438	0.0629834	5.29384	1.19776e-07	1.50182e-06
ENSMUSG00000030834	Abcc6	protein_coding	7	Multidrug resistance-associated protein 6	0.988127	0.357612	0.348992	0.819716	0.412378
ENSMUSG00000030249	Abcc9	protein_coding	6	ATP-binding cassette, sub-family C (CFTR/MRP), member 9	39.5538	-1.1618	0.363599	-3.33348	0.000857655	0.00493007
ENSMUSG00000031378	Abcd1	protein_coding	X	ATP-binding cassette, sub-family D (ALD), member 1	252.301	-0.174469	0.105876	-1.64987	0.0989695	0.236106
ENSMUSG00000055782	Abcd2	protein_coding	15	ATP-binding cassette, sub-family D (ALD), member 2	172.972	-0.0706248	0.11814	-0.59786	0.549934	0.726358
ENSMUSG00000028127	Abcd3	protein_coding	3	ATP-binding cassette, sub-family D (ALD), member 3	1813.42	0.227191	0.0475591	4.77723	1.77728e-06	1.87686e-05
ENSMUSG00000021240	Abcd4	protein_coding	12	ATP-binding cassette, sub-family D (ALD), member 4	584.264	0.0292159	0.062101	0.470406	0.638065	0.79181
ENSMUSG00000058355	Abce1	protein_coding	8	ATP-binding cassette, sub-family E (OABP), member 1	8632.86	0.0714884	0.0458295	1.55987	0.118791	0.26742
ENSMUSG00000038762	Abcf1	protein_coding	17	ATP-binding cassette, sub-family F (GCN20), member 1	3077.37	0.328119	0.0544168	6.02971	1.64251e-09	2.62094e-08
ENSMUSG00000028953	Abcf2	protein_coding	5	ATP-binding cassette, sub-family F (GCN20), member 2	2404.37	0.0738071	0.0513252	1.438	0.150434	0.315064
ENSMUSG00000003234	Abcf3	protein_coding	16	ATP-binding cassette, sub-family F (GCN20), member 3	1492.45	0.0937083	0.051501	1.81963	0.0688154	0.179578
ENSMUSG00000024030	Abcg1	protein_coding	17	ATP binding cassette subfamily G member 1	33.0729	-0.419594	0.260437	-1.62848	0.103423	0.243636
ENSMUSG00000029802	Abcg2	protein_coding	6	ATP binding cassette subfamily G member 2 (Junior blood group)	2334.44	0.0345075	0.0501266	0.68839	0.491207	0.6823
ENSMUSG00000032131	Abcg4	protein_coding	9	ATP binding cassette subfamily G member 4	3.31373	0.0709629	0.414247	0.179866	0.857258
ENSMUSG00000006638	Abhd1	processed_transcript	5	abhydrolase domain containing 1	241.643	-0.710776	0.108826	-6.53031	6.56319e-11	1.21646e-09
ENSMUSG00000033157	Abhd10	protein_coding	16	abhydrolase domain containing 10	318.015	-0.0310597	0.0903343	-0.343714	0.731061	0.853981
ENSMUSG00000040532	Abhd11	protein_coding	5	abhydrolase domain containing 11	394.049	-0.142774	0.0793822	-1.79775	0.0722161	0.186134
ENSMUSG00000032046	Abhd12	protein_coding	2	abhydrolase domain containing 12	1399.94	0.044055	0.0486457	0.905645	0.365124	0.570351
ENSMUSG00000040396	Abhd13	protein_coding	8	abhydrolase domain containing 13	1541.1	-0.175085	0.0484376	-3.61471	0.000300683	0.00196607
ENSMUSG00000042210	Abhd14a	protein_coding	9	abhydrolase domain containing 14A	234.194	-0.0331072	0.105194	-0.314982	0.752776	0.865862
ENSMUSG00000042073	Abhd14b	protein_coding	9	abhydrolase domain containing 14b	73.1332	0.477042	0.180278	2.64513	0.00816594	0.0330594
ENSMUSG00000000686	Abhd15	protein_coding	11	abhydrolase domain containing 15	25.5992	0.415766	0.27027	1.53782	0.124093	0.275971
ENSMUSG00000007036	Abhd16a	protein_coding	17	abhydrolase domain containing 16A	897.908	-0.0538666	0.0647586	-0.831994	0.405412	0.607614
ENSMUSG00000003346	Abhd17a	protein_coding	10	abhydrolase domain containing 17A	1296.54	-0.0628022	0.0598718	-1.04897	0.294192	0.496108
ENSMUSG00000047368	Abhd17b	protein_coding	19	abhydrolase domain containing 17B	944.918	-0.237841	0.0561971	-4.23213	2.3149e-05	0.00019791
ENSMUSG00000038459	Abhd17c	protein_coding	7	abhydrolase domain containing 17C	498.893	0.095203	0.0721772	1.31918	0.18711	0.367484
ENSMUSG00000037818	Abhd18	protein_coding	3	abhydrolase domain containing 18	125.869	-0.170371	0.148708	-1.14941	0.250387	0.445411
ENSMUSG00000039202	Abhd2	protein_coding	7	abhydrolase domain containing 2	1905.83	-0.275818	0.0684259	-4.03083	5.55804e-05	0.000442227
ENSMUSG00000002475	Abhd3	protein_coding	18	abhydrolase domain containing 3	30.6394	0.473307	0.260329	1.82317	0.0682783	0.178434
ENSMUSG00000040997	Abhd4	protein_coding	14	abhydrolase domain containing 4	870.545	-0.0857177	0.083185	-1.03116	0.302464	0.505049
ENSMUSG00000032540	Abhd5	protein_coding	9	abhydrolase domain containing 5	1143.24	0.229576	0.0524797	4.3744	1.21766e-05	0.000109612
ENSMUSG00000025277	Abhd6	protein_coding	14	abhydrolase domain containing 6	209.347	-0.155142	0.111987	-1.38481	0.16611	0.33771
ENSMUSG00000007950	Abhd8	protein_coding	8	abhydrolase domain containing 8	1585.08	-0.904852	0.0645689	-14.0127	1.30426e-44	1.1859e-42
ENSMUSG00000058835	Abi1	protein_coding	2	abl-interactor 1	2250.95	0.0627373	0.0477068	1.31505	0.188493	0.369046
ENSMUSG00000026782	Abi2	protein_coding	1	abl-interactor 2	1411.01	0.0493585	0.0614752	0.802899	0.422033	0.621579
ENSMUSG00000018381	Abi3	protein_coding	11	ABI gene family, member 3	3.41474	0.412756	0.41261	1.03222	0.301968
ENSMUSG00000026842	Abl1	protein_coding	2	c-abl oncogene 1, non-receptor tyrosine kinase	2145.01	0.0655177	0.0555269	1.17994	0.238026	0.431166
ENSMUSG00000026596	Abl2	protein_coding	1	v-abl Abelson murine leukemia viral oncogene 2 (arg, Abelson-related gene)	2809.27	-0.0153763	0.0647809	-0.237334	0.812398	0.902566
ENSMUSG00000025085	Ablim1	protein_coding	19	actin-binding LIM protein 1	3902.81	-0.372225	0.0543644	-6.84832	7.47216e-12	1.54986e-10
ENSMUSG00000029095	Ablim2	protein_coding	5	actin-binding LIM protein 2	23.8247	-0.135122	0.391605	-0.493659	0.621547	0.780416
ENSMUSG00000032735	Ablim3	protein_coding	18	actin binding LIM protein family, member 3	228.391	-1.21082	0.266305	-4.72672	2.28174e-06	2.36976e-05
ENSMUSG00000017631	Abr	protein_coding	11	active BCR-related gene	4059.22	-0.0968258	0.0468833	-2.06537	0.0388876	0.115631
ENSMUSG00000042895	Abra	protein_coding	15	actin-binding Rho activating protein	259.058	-1.00144	0.259386	-4.05477	5.01826e-05	0.000401489
ENSMUSG00000078453	Abracl	protein_coding	10	ABRA C-terminal like	1890.38	-0.163111	0.054166	-3.01121	0.00260212	0.0127825
ENSMUSG00000035234	Abraxas1	protein_coding	5	BRCA1 A complex subunit	357.336	0.0911074	0.0814324	1.11856	0.263327	0.461097
ENSMUSG00000030965	Abraxas2	protein_coding	7	BRISC complex subunit	1135.04	-0.0358996	0.0697762	-0.514655	0.606794	0.769916
ENSMUSG00000036376	Abt1	protein_coding	13	activator of basal transcription 1	455.44	0.0018146	0.0746722	0.0243179	0.980599	0.991343
ENSMUSG00000030083	Abtb1	protein_coding	6	ankyrin repeat and BTB (POZ) domain containing 1	338.86	0.11369	0.102396	1.11107	0.266539	0.464596
ENSMUSG00000032724	Abtb2	protein_coding	2	ankyrin repeat and BTB (POZ) domain containing 2	695.014	-0.0377392	0.0690178	-0.547009	0.584372	0.751646
ENSMUSG00000115457	AC022775.2	processed_pseudogene	15		6.5271	0.366383	0.39042	0.944068	0.345135	0.550548
ENSMUSG00000110773	AC061963.1	antisense	9		2.38274	-0.0873133	0.408635	-0.22145	0.824742
ENSMUSG00000111684	AC073947.1	processed_pseudogene	9		7.67167	-0.0978846	0.390766	-0.248143	0.804024	0.897796
ENSMUSG00000116068	AC100400.1	lincRNA	15		5.78055	-0.955856	0.393654	-2.20899	0.0271751	0.0875186
ENSMUSG00000115381	AC102847.2	TEC	15		2.52045	0.564995	0.40368	1.1795	0.2382
ENSMUSG00000116009	AC104325.1	lincRNA	15		3.57699	0.691449	0.412546	1.61804	0.105654
ENSMUSG00000116226	AC105358.1	TEC	15		15.8644	-0.286491	0.31952	-0.883132	0.377165	0.581416
ENSMUSG00000115148	AC107711.1	TEC	14		6.88552	0.360082	0.385192	0.903213	0.366413	0.571346
ENSMUSG00000115702	AC107711.5	transcribed_processed_pseudogene	14		2.67071	0.477409	0.410709	1.16097	0.245655
ENSMUSG00000116190	AC109617.1	lincRNA	15		2.73558	-1.20373	0.406733	-2.57053	0.0101543
ENSMUSG00000116237	AC109617.2	lincRNA	15		31.2783	-1.4981	0.260509	-5.62178	1.89003e-08	2.61475e-07
ENSMUSG00000115882	AC112943.1	processed_pseudogene	16		3.98987	1.02333	0.413308	2.34306	0.0191264
ENSMUSG00000115902	AC113595.1	antisense	15		1.48563	-0.220573	0.376921	-0.477878	0.632737
ENSMUSG00000115971	AC113595.2	lincRNA	15		5.37011	-0.111068	0.400499	-0.273421	0.784529	0.886158
ENSMUSG00000115383	AC115735.3	sense_overlapping	15		4.66673	0.115255	0.413111	0.264939	0.791056
ENSMUSG00000115252	AC115746.1	TEC	15		14.1786	0.0761304	0.324279	0.231494	0.816931	0.904386
ENSMUSG00000115205	AC117588.1	processed_pseudogene	15		2.90233	0.198992	0.414125	0.448702	0.653647
ENSMUSG00000115210	AC120375.1	TEC	14		10.4078	-0.0190717	0.341704	-0.0533107	0.957484	0.978673
ENSMUSG00000115193	AC121357.1	processed_pseudogene	15		1.96914	-0.230536	0.390054	-0.543889	0.586518
ENSMUSG00000113902	AC121965.1	bidirectional_promoter_lncRNA	12		1402.43	0.0831049	0.0666815	1.24634	0.212639	0.399818
ENSMUSG00000115384	AC121997.1	processed_pseudogene	14		1.93321	-0.719911	0.398444	-1.75364	0.0794929
ENSMUSG00000112035	AC122018.1	lincRNA	10		2.14074	0.363442	0.405635	0.788265	0.430542
ENSMUSG00000115596	AC122251.2	lincRNA	14		5.89988	0.182482	0.396674	0.449793	0.65286	0.801903
ENSMUSG00000115249	AC122291.1	antisense	15		2.45526	0.357631	0.404399	0.847453	0.396742
ENSMUSG00000111740	AC122335.1	TEC	10		42.5831	0.292557	0.204816	1.41863	0.156007	0.323306
ENSMUSG00000115009	AC122397.1	lincRNA	15		9.44782	-0.175205	0.35379	-0.480623	0.630784	0.786956
ENSMUSG00000115057	AC122459.1	processed_pseudogene	15		1.75746	-0.162132	0.391014	-0.396469	0.691759
ENSMUSG00000115280	AC122858.2	processed_pseudogene	14		7.04084	0.325707	0.384186	0.825187	0.409265	0.611246
ENSMUSG00000110869	AC122901.1	TEC	10		3.82917	-0.123298	0.413459	-0.287478	0.773746
ENSMUSG00000115503	AC122937.3	processed_pseudogene	15		47.4352	-0.12877	0.205092	-0.628457	0.529705	0.711744
ENSMUSG00000115505	AC123061.1	processed_pseudogene	14		9.83361	-0.754476	0.367556	-2.02737	0.042625	0.124312
ENSMUSG00000116090	AC123611.1	processed_pseudogene	15		3.94425	-0.325476	0.413222	-0.786259	0.431716
ENSMUSG00000116164	AC123724.1	lincRNA	15		11.7691	-0.0591107	0.356886	-0.168652	0.86607	0.93094
ENSMUSG00000116180	AC123724.2	bidirectional_promoter_lncRNA	15		7.53542	0.116992	0.39288	0.31583	0.752131	0.865729
ENSMUSG00000116056	AC123870.1	lincRNA	15		7.07663	0.245181	0.409566	0.762742	0.445617	0.64185
ENSMUSG00000113836	AC124426.1	transcribed_processed_pseudogene	13		130.98	0.0838813	0.128537	0.651534	0.514702	0.700774
ENSMUSG00000115637	AC124709.2	processed_pseudogene	14		0.801592	-0.453551	0.311417	-1.29608	0.194947
ENSMUSG00000115662	AC125311.2	processed_pseudogene	14		13.8841	0.18531	0.31892	0.577055	0.563902	0.736435
ENSMUSG00000115326	AC125328.1	lincRNA	15		175.154	-0.920763	0.242911	-3.77397	0.00016067	0.00112262
ENSMUSG00000113184	AC125351.1	lincRNA	12		3.65549	-0.427002	0.413312	-1.15169	0.249448
ENSMUSG00000116089	AC125541.1	processed_pseudogene	15		7.15399	-0.0843385	0.384772	-0.220446	0.825524	0.909026
ENSMUSG00000115685	AC126028.2	TEC	15		8.5467	-0.409782	0.362448	-1.11382	0.265357	0.463094
ENSMUSG00000111128	AC126804.1	TEC	9		146.134	-0.260855	0.14896	-1.75552	0.0791709	0.19913
ENSMUSG00000116398	AC127697.1	processed_pseudogene	15		7.91286	-0.0679649	0.374796	-0.178184	0.858578	0.927768
ENSMUSG00000115426	AC129931.1	lincRNA	15		3.19285	-0.324618	0.411012	-0.849631	0.395531
ENSMUSG00000115161	AC130219.1	TEC	15		9.40713	0.0260621	0.364653	0.0689115	0.94506	0.972578
ENSMUSG00000115700	AC130669.1	processed_pseudogene	15		1.83511	-0.188309	0.393387	-0.49777	0.618646
ENSMUSG00000115138	AC130671.1	lincRNA	15		2.16504	0.251411	0.405096	0.595527	0.551491
ENSMUSG00000115543	AC130671.2	TEC	15		8.00093	0.228918	0.375445	0.597514	0.550164	0.726462
ENSMUSG00000115568	AC130671.3	TEC	15		11.193	0.321339	0.338046	0.931883	0.351397	0.556484
ENSMUSG00000115497	AC131033.1	lincRNA	15		5.31038	-0.552073	0.402247	-1.29213	0.196312
ENSMUSG00000114996	AC131586.1	TEC	14		11.6724	0.711324	0.337934	2.04222	0.0411297	0.120758
ENSMUSG00000115100	AC131586.2	lincRNA	14		26.3017	0.153084	0.27786	0.557622	0.577103	0.746669
ENSMUSG00000115417	AC131586.4	sense_intronic	14		1.64277	-0.154806	0.395015	-0.345754	0.729528
ENSMUSG00000107970	AC132412.1	TEC	6		4.17335	0.000676013	0.409135	0.00170941	0.998636
ENSMUSG00000115480	AC132833.1	lincRNA	15		5.92728	-0.303398	0.40176	-0.759828	0.447357	0.643521
ENSMUSG00000115810	AC132863.2	bidirectional_promoter_lncRNA	15		20.8941	-0.0596541	0.270332	-0.218187	0.827283	0.910199
ENSMUSG00000115808	AC133101.1	processed_pseudogene	15		3.69768	-0.263405	0.414162	-0.638375	0.52323
ENSMUSG00000114053	AC133498.1	lincRNA	13		7.18429	0.638825	0.375874	1.59582	0.110528	0.254083
ENSMUSG00000116311	AC133868.2	antisense	15		9.03761	0.112986	0.356802	0.311765	0.755219	0.867281
ENSMUSG00000113332	AC134254.2	unprocessed_pseudogene	12		3.44606	-0.184004	0.414036	-0.425425	0.670527
ENSMUSG00000112639	AC134329.1	lincRNA	10		20.6538	0.0936752	0.295145	0.31825	0.750295	0.864373
ENSMUSG00000114147	AC134468.1	transcribed_processed_pseudogene	12		2.83395	-0.508373	0.411792	-1.19592	0.231728
ENSMUSG00000115817	AC134577.3	lincRNA	14		22.6907	0.350739	0.276005	1.2501	0.211264	0.398362
ENSMUSG00000115312	AC136376.2	processed_pseudogene	14		3.25167	-0.130404	0.414266	-0.306283	0.759389
ENSMUSG00000114995	AC137842.1	TEC	15		17.791	0.542992	0.309141	1.74832	0.0804082	0.201397
ENSMUSG00000115856	AC138177.1	processed_pseudogene	15		6.65329	-0.100335	0.403438	-0.263735	0.791984	0.890682
ENSMUSG00000116255	AC138177.3	processed_pseudogene	15		3.42284	-0.514942	0.414027	-1.19085	0.233712
ENSMUSG00000116478	AC138177.4	processed_pseudogene	15		3.9138	0.45235	0.414195	1.12535	0.260442
ENSMUSG00000116518	AC138177.5	processed_transcript	15		15.272	0.509904	0.325781	1.56889	0.116673	0.264089
ENSMUSG00000115750	AC138604.2	lincRNA	15		2.22086	0.0912699	0.408694	0.215963	0.829017
ENSMUSG00000115151	AC138765.2	lincRNA	15		15.7212	-0.048409	0.309247	-0.155592	0.876354	0.935692
ENSMUSG00000115317	AC139845.1	lincRNA	15		622.321	0.292531	0.0848817	3.4495	0.000561635	0.0034097
ENSMUSG00000115486	AC140208.1	processed_pseudogene	14		4.66871	0.489576	0.411732	1.11194	0.266162
ENSMUSG00000116355	AC144732.1	processed_pseudogene	15		4.18732	-0.408748	0.413681	-1.04044	0.298136
ENSMUSG00000115340	AC144772.1	TEC	15		2.18614	0.151327	0.39992	0.358414	0.720033
ENSMUSG00000115793	AC144772.2	TEC	15		5.13374	-0.162465	0.404559	-0.40171	0.687898
ENSMUSG00000115837	AC144772.3	TEC	15		3.94183	0.171717	0.412744	0.405862	0.684844
ENSMUSG00000095041	AC149090.1	protein_coding	JH584304.1		1126.28	0.158979	0.0880558	1.80548	0.0709996	0.183752
ENSMUSG00000115276	AC149588.1	TEC	15		32.1945	-0.00898939	0.262933	-0.033917	0.972943	0.987671
ENSMUSG00000113361	AC152827.1	lincRNA	12		7.66905	0.899977	0.37805	2.30759	0.0210221	0.0712416
ENSMUSG00000112558	AC153379.1	lincRNA	10		4.24159	0.397709	0.410986	0.979468	0.327349
ENSMUSG00000112237	AC153911.1	transcribed_processed_pseudogene	10		24.4899	0.119076	0.279887	0.420122	0.674396	0.817041
ENSMUSG00000108878	AC154141.1	TEC	7		15.8569	0.629253	0.310695	2.00174	0.0453125	0.130313
ENSMUSG00000115007	AC154276.1	bidirectional_promoter_lncRNA	14		2.86693	0.336207	0.412248	0.86372	0.387742
ENSMUSG00000114602	AC154335.1	sense_intronic	13		1.44337	-0.482719	0.368147	-1.15856	0.246637
ENSMUSG00000115936	AC154509.1	lincRNA	16		131.143	0.000245971	0.137886	0.00181374	0.998553	0.999244
ENSMUSG00000115686	AC154528.2	TEC	14		5.35867	-0.0307466	0.406499	-0.0728791	0.941902	0.970361
ENSMUSG00000113294	AC154636.1	unprocessed_pseudogene	12		2.69715	-0.0598355	0.401188	-0.154442	0.877262
ENSMUSG00000114025	AC154636.2	unprocessed_pseudogene	12		47.6431	-0.412891	0.204167	-2.0213	0.0432489	0.125704
ENSMUSG00000115624	AC154640.4	TEC	14		30.5873	0.0449095	0.26228	0.171043	0.86419	0.930279
ENSMUSG00000115124	AC154738.2	lincRNA	14		4.54596	-0.211234	0.409631	-0.494508	0.620947
ENSMUSG00000115299	AC154738.5	processed_pseudogene	14		2.22166	-0.45133	0.400503	-0.937541	0.34848
ENSMUSG00000115220	AC154760.1	lincRNA	14		30.7408	0.276509	0.253403	1.09346	0.274191	0.474117
ENSMUSG00000115842	AC154766.1	lincRNA	17		2.53007	-0.733709	0.402832	-2.57452	0.0100379
ENSMUSG00000114547	AC154767.1	processed_pseudogene	13		5.50442	0.347863	0.40216	0.818058	0.413324	0.614113
ENSMUSG00000115354	AC154806.2	lincRNA	14		30.5798	0.0238074	0.241526	0.0985816	0.92147	0.959597
ENSMUSG00000113432	AC154828.1	TEC	13		10.9282	0.172349	0.347735	0.494107	0.621231	0.780172
ENSMUSG00000115743	AC154855.1	processed_pseudogene	14		2.64637	-0.0835326	0.407942	-0.233946	0.815027
ENSMUSG00000115026	AC155729.1	bidirectional_promoter_lncRNA	6		2.84467	0.453975	0.40932	1.25786	0.208442
ENSMUSG00000116145	AC157566.1	TEC	15		9.1409	0.354779	0.384396	0.897283	0.369568	0.573821
ENSMUSG00000116238	AC157566.3	TEC	15		3.55291	0.393736	0.413585	0.88814	0.374466
ENSMUSG00000115141	AC157572.1	lincRNA	14		1.56926	-0.150403	0.381944	-0.334889	0.737709
ENSMUSG00000115868	AC157602.1	processed_pseudogene	15		3.759	-0.325287	0.414231	-0.775387	0.438111
ENSMUSG00000115678	AC157772.2	lincRNA	15		33.0216	0.0696341	0.267698	0.265065	0.790959	0.890221
ENSMUSG00000115975	AC158556.2	TEC	15		4.16761	0.6052	0.412677	1.32186	0.186214
ENSMUSG00000115779	AC158954.1	antisense	15		4.47173	-0.41571	0.41057	-1.009	0.312974
ENSMUSG00000115988	AC158972.2	lincRNA	15		1.91302	-0.745132	0.38123	-2.08512	0.0370586
ENSMUSG00000115494	AC158981.1	lincRNA	14		13.9519	-0.773892	0.34485	-2.26935	0.0232469	0.0772776
ENSMUSG00000115306	AC158988.1	TEC	14		3.4624	0.0662126	0.412091	0.146919	0.883196
ENSMUSG00000113196	AC159193.1	TEC	12		4.69192	-0.261754	0.409058	-0.614302	0.539016
ENSMUSG00000111394	AC160637.1	TEC	9		415.956	0.040562	0.209699	0.192963	0.846988	0.921308
ENSMUSG00000116223	AC161165.3	antisense	15		1.97591	-0.570289	0.402452	-1.24745	0.212231
ENSMUSG00000116506	AC161165.6	lincRNA	15		5.38304	0.203119	0.41068	0.557065	0.577483	0.746915
ENSMUSG00000115450	AC161383.1	processed_pseudogene	14		7.66849	-0.0369841	0.383805	-0.0975443	0.922294	0.959817
ENSMUSG00000115783	AC161763.1	lincRNA	7		698.314	0.871397	0.157703	5.52283	3.33581e-08	4.4778e-07
ENSMUSG00000115944	AC161812.1	lincRNA	15		2.14007	-0.00501756	0.382347	-0.0128363	0.989758
ENSMUSG00000115789	AC161877.2	processed_pseudogene	14		2.3049	-0.230371	0.407542	-0.529354	0.59656
ENSMUSG00000116004	AC162302.1	lincRNA	15		6.27233	-0.085417	0.391256	-0.211725	0.832322	0.913048
ENSMUSG00000116305	AC162302.2	processed_transcript	15		134.162	-0.079417	0.157904	-0.502298	0.615458	0.776141
ENSMUSG00000116212	AC162863.2	processed_pseudogene	15		3.00944	-0.242989	0.412069	-0.655307	0.51227
ENSMUSG00000116114	AC163018.1	antisense	15		81.6562	0.442548	0.178629	2.47784	0.013218	0.0488228
ENSMUSG00000113831	AC163032.1	lincRNA	12		57.4902	-0.198175	0.193011	-1.02905	0.303458	0.506009
ENSMUSG00000114880	AC163638.1	TEC	14		3.95247	-0.522385	0.410436	-1.19899	0.230532
ENSMUSG00000114771	AC163667.1	lincRNA	13		4.98977	0.244906	0.411851	0.625755	0.531475
ENSMUSG00000115726	AC164099.2	protein_coding	14		1.26413	-0.13242	0.333969	-0.500836	0.616487
ENSMUSG00000115767	AC164433.2	antisense	14		6.89867	-0.597417	0.398011	-1.56271	0.118121	0.266492
ENSMUSG00000114994	AC164883.1	antisense	15		2.97048	0.179294	0.414414	0.389133	0.697178
ENSMUSG00000114477	AC165265.1	processed_pseudogene	13		2.52156	-0.429883	0.412246	-0.941105	0.346651
ENSMUSG00000112368	AC166323.1	unprocessed_pseudogene	12		18.5746	0.352036	0.288119	1.21197	0.225525	0.41537
ENSMUSG00000115483	AC166344.3	protein_coding	14		34.6115	0.381029	0.239234	1.58445	0.113092	0.258249
ENSMUSG00000115829	AC166356.1	antisense	15		1.43288	-0.282086	0.373085	-0.744323	0.456681
ENSMUSG00000114999	AC166491.1	processed_pseudogene	15		26.093	0.727864	0.258732	2.79667	0.00516326	0.0225583
ENSMUSG00000115546	AC167019.3	antisense	15		3.9227	0.307581	0.407707	0.690905	0.489625
ENSMUSG00000115813	AC167565.2	lincRNA	14		2.56732	0.44946	0.409626	1.1371	0.255496
ENSMUSG00000115869	AC169509.2	sense_intronic	16		16.4938	-0.310772	0.33795	-0.944433	0.344949	0.55045
ENSMUSG00000115919	AC169509.3	lincRNA	16		1.59632	-0.257734	0.362338	-1.0662	0.286335
ENSMUSG00000116173	AC169509.4	sense_intronic	16		1.46832	0.00302479	0.353995	0.00475608	0.996205
ENSMUSG00000116437	AC169509.5	lincRNA	16		2.12874	-0.236935	0.388814	-0.932589	0.351032
ENSMUSG00000115264	AC169511.2	TEC	14		2.30685	0.0700679	0.41167	0.154797	0.876981
ENSMUSG00000115555	AC174647.1	TEC	14		3.76714	0.75231	0.413665	1.82483	0.0680269
ENSMUSG00000115222	AC174678.1	antisense	14		19.8369	0.0500933	0.272396	0.181876	0.85568	0.926118
ENSMUSG00000036138	Acaa1a	protein_coding	9	acetyl-Coenzyme A acyltransferase 1A	533.777	-0.00961248	0.0738594	-0.130163	0.896437	0.946704
ENSMUSG00000010651	Acaa1b	protein_coding	9	acetyl-Coenzyme A acyltransferase 1B	28.6925	0.249315	0.267734	0.935205	0.349683	0.55523
ENSMUSG00000036880	Acaa2	protein_coding	18	3-ketoacyl-CoA thiolase, mitochondrial	2896.85	-0.35338	0.0533749	-6.62112	3.56494e-11	6.88884e-10
ENSMUSG00000020532	Acaca	protein_coding	11	acetyl-Coenzyme A carboxylase alpha	792.599	-0.0872501	0.0713475	-1.22279	0.22141	0.410406
ENSMUSG00000042010	Acacb	protein_coding	5	acetyl-Coenzyme A carboxylase beta	19.5675	-0.33319	0.31134	-1.08417	0.278291	0.4777
ENSMUSG00000029456	Acad10	protein_coding	5	acyl-Coenzyme A dehydrogenase family, member 10	210.562	-1.14795	0.110977	-10.325	5.43248e-25	2.49325e-23
ENSMUSG00000090150	Acad11	protein_coding	9	acyl-Coenzyme A dehydrogenase family, member 11	420.072	0.0461201	0.0933591	0.494415	0.621013	0.780016
ENSMUSG00000042647	Acad12	protein_coding	5	acyl-Coenzyme A dehydrogenase family, member 12	113.282	-0.070962	0.145446	-0.489063	0.624797	0.782932
ENSMUSG00000031969	Acad8	protein_coding	9	acyl-Coenzyme A dehydrogenase family, member 8	636.86	0.106046	0.0734609	1.4436	0.14885	0.312371
ENSMUSG00000027710	Acad9	protein_coding	3	acyl-Coenzyme A dehydrogenase family, member 9	1003.27	0.104678	0.0610001	1.71591	0.0861788	0.21198
ENSMUSG00000026003	Acadl	protein_coding	1	acyl-Coenzyme A dehydrogenase, long-chain	1339.59	-0.00408831	0.0512167	-0.0798245	0.936377	0.967168
ENSMUSG00000062908	Acadm	protein_coding	3	acyl-Coenzyme A dehydrogenase, medium chain	2463.89	-0.162089	0.048299	-3.35594	0.000790956	0.00458224
ENSMUSG00000029545	Acads	protein_coding	5	acyl-Coenzyme A dehydrogenase, short chain	1724.88	-0.023111	0.049772	-0.464386	0.642371	0.794623
ENSMUSG00000030861	Acadsb	protein_coding	7	acyl-Coenzyme A dehydrogenase, short/branched chain	2140.59	0.125862	0.0467549	2.6923	0.00709602	0.0293526
ENSMUSG00000018574	Acadvl	protein_coding	11	acyl-Coenzyme A dehydrogenase, very long chain	3066.78	-0.0307709	0.040288	-0.76379	0.444992	0.641273
ENSMUSG00000001588	Acap1	protein_coding	11	ArfGAP with coiled-coil, ankyrin repeat and PH domains 1	19.7284	0.370626	0.268777	1.35384	0.175786	0.351547
ENSMUSG00000049076	Acap2	protein_coding	16	ArfGAP with coiled-coil, ankyrin repeat and PH domains 2	3029.05	0.122386	0.0427172	2.86495	0.00417074	0.0189029
ENSMUSG00000029033	Acap3	protein_coding	4	ArfGAP with coiled-coil, ankyrin repeat and PH domains 3	817.521	0.235428	0.0616511	3.81841	0.000134316	0.000957501
ENSMUSG00000032047	Acat1	protein_coding	9	Acetyl-CoA acetyltransferase, mitochondrial	2136.17	-0.178429	0.0589073	-3.02886	0.00245479	0.0121537
ENSMUSG00000023832	Acat2	protein_coding	17	acetyl-Coenzyme A acetyltransferase 2	865.687	-0.0023276	0.0646346	-0.0360089	0.971275	0.987185
ENSMUSG00000062480	Acat3	protein_coding	17	acetyl-Coenzyme A acetyltransferase 3	4.37193	0.668312	0.411857	1.63729	0.10157
ENSMUSG00000026499	Acbd3	protein_coding	1	acyl-CoA binding domain containing 3	1986.6	0.0653401	0.0483952	1.35014	0.176972	0.353509
ENSMUSG00000056938	Acbd4	protein_coding	11	acyl-Coenzyme A binding domain containing 4	711.887	-0.0401949	0.0646797	-0.621437	0.534312	0.714244
ENSMUSG00000026781	Acbd5	protein_coding	2	acyl-Coenzyme A binding domain containing 5	2327.14	0.0685546	0.0498937	1.37404	0.16943	0.343061
ENSMUSG00000033701	Acbd6	protein_coding	1	acyl-Coenzyme A binding domain containing 6	687.43	-0.00883812	0.0694694	-0.127282	0.898717	0.948008
ENSMUSG00000040272	Accs	protein_coding	2	1-aminocyclopropane-1-carboxylate synthase (non-functional)	287.438	0.0272694	0.097748	0.279027	0.780224	0.884058
ENSMUSG00000038000	Acd	protein_coding	8	adrenocortical dysplasia	220.737	-0.108496	0.120741	-0.898753	0.368784	0.573296
ENSMUSG00000020681	Ace	protein_coding	11	angiotensin I converting enzyme (peptidyl-dipeptidase A) 1	65.97	0.885411	0.230036	3.88645	0.000101722	0.000752223
ENSMUSG00000038007	Acer2	protein_coding	4	alkaline ceramidase 2	1.94835	0.794814	0.404276	1.7847	0.0743093
ENSMUSG00000030760	Acer3	protein_coding	7	alkaline ceramidase 3	480.336	0.185293	0.0737362	2.51219	0.0119983	0.045113
ENSMUSG00000023328	Ache	protein_coding	5	acetylcholinesterase	2.21789	0.227425	0.394319	0.723609	0.469306
ENSMUSG00000022185	Acin1	protein_coding	14	apoptotic chromatin condensation inducer 1	2418.19	0.0671307	0.0516847	1.29885	0.193997	0.376004
ENSMUSG00000044337	Ackr3	protein_coding	1	atypical chemokine receptor 3	1663.3	-0.451974	0.0558491	-8.09175	5.88149e-16	1.66723e-14
ENSMUSG00000079355	Ackr4	protein_coding	9	atypical chemokine receptor 4	6.38902	0.733378	0.41304	1.969	0.0489526	0.138359
ENSMUSG00000020917	Acly	protein_coding	11	ATP citrate lyase	5622.37	0.0681505	0.0452391	1.50645	0.131953	0.288076
ENSMUSG00000028405	Aco1	protein_coding	4	aconitase 1	2170.08	-0.0614049	0.0452333	-1.35752	0.174616	0.349886
ENSMUSG00000022477	Aco2	protein_coding	15	aconitase 2, mitochondrial	6887.23	-0.171408	0.0326089	-5.25656	1.46774e-07	1.81205e-06
ENSMUSG00000072949	Acot1	protein_coding	12	acyl-CoA thioesterase 1	70.2176	0.532148	0.182808	2.91352	0.00357376	0.0166933
ENSMUSG00000047565	Acot10	protein_coding	15	acyl-CoA thioesterase 10	9.22488	-0.0898333	0.361308	-0.243262	0.807802	0.900042
ENSMUSG00000034853	Acot11	protein_coding	4	acyl-CoA thioesterase 11	83.8523	-0.091695	0.174925	-0.526681	0.598415	0.762967
ENSMUSG00000006717	Acot13	protein_coding	13	acyl-CoA thioesterase 13	506.029	0.0115962	0.078495	0.147703	0.882577	0.938883
ENSMUSG00000021226	Acot2	protein_coding	12	acyl-CoA thioesterase 2	252.262	0.677989	0.105424	6.43337	1.24806e-10	2.24139e-09
ENSMUSG00000052392	Acot4	protein_coding	12	acyl-CoA thioesterase 4	4.05541	-0.259911	0.413417	-0.646091	0.518221
ENSMUSG00000043487	Acot6	protein_coding	12	Acyl-coenzyme A thioesterase 6	23.0401	-0.259613	0.300779	-0.889147	0.373924	0.577915
ENSMUSG00000028937	Acot7	protein_coding	4	Cytosolic acyl coenzyme A thioester hydrolase	2510.77	0.180229	0.0549374	3.28027	0.00103706	0.00582697
ENSMUSG00000017307	Acot8	protein_coding	2	Acyl-coenzyme A thioesterase 8	166.818	-0.102919	0.124747	-0.824889	0.409434	0.611361
ENSMUSG00000025287	Acot9	protein_coding	X	Acyl-coenzyme A thioesterase 9, mitochondrial	3466.2	-0.0293604	0.044501	-0.659743	0.509419	0.696619
ENSMUSG00000020777	Acox1	protein_coding	11	Peroxisomal acyl-coenzyme A oxidase 1	2776.26	0.0296654	0.042078	0.705018	0.480799	0.673342
ENSMUSG00000021751	Acox2	protein_coding	14	Peroxisomal acyl-coenzyme A oxidase 2	7.45274	-0.553093	0.412342	-2.00818	0.0446246	0.12877
ENSMUSG00000029098	Acox3	protein_coding	5	Mus musculus acyl-Coenzyme A oxidase 3, pristanoyl (Acox3), transcript variant 3, mRNA.	745.87	0.000280704	0.0655132	0.00416929	0.996673	0.998426
ENSMUSG00000027380	Acoxl	protein_coding	2	Acyl-coenzyme A oxidase-like protein	4.99049	0.144336	0.413382	0.406357	0.68448
ENSMUSG00000044573	Acp1	protein_coding	12	acid phosphatase 1, soluble	161.359	-0.095046	0.114178	-0.83143	0.405731	0.60784
ENSMUSG00000002103	Acp2	protein_coding	2	Mus musculus acid phosphatase 2, lysosomal (Acp2), transcript variant 1, mRNA.	919.072	-0.0167914	0.0670632	-0.250531	0.802177	0.896635
ENSMUSG00000001348	Acp5	protein_coding	9	Tartrate-resistant acid phosphatase type 5	4.11928	0.137621	0.413668	0.332569	0.73946
ENSMUSG00000028093	Acp6	protein_coding	3	Lysophosphatidic acid phosphatase type 6	267.366	0.0205166	0.103037	0.19916	0.842138	0.918505
ENSMUSG00000032561	Acpp	protein_coding	9	Prostatic acid phosphatase	159.279	0.374713	0.133713	2.80179	0.00508202	0.0223044
ENSMUSG00000072770	Acrbp	protein_coding	6	Acrosin-binding protein	15.916	-0.0662264	0.326572	-0.204932	0.837625	0.916071
ENSMUSG00000032281	Acsbg1	protein_coding	9	acyl-CoA synthetase bubblegum family member 1	170.134	0.171746	0.112547	1.52175	0.128073	0.282162
ENSMUSG00000076435	Acsf2	protein_coding	11	Acyl-CoA synthetase family member 2, mitochondrial	7.37324	0.0483858	0.376231	0.126198	0.899575	0.948252
ENSMUSG00000015016	Acsf3	protein_coding	8	Acyl-CoA synthetase family member 3, mitochondrial	162.731	0.0295092	0.120214	0.2455	0.80607	0.899178
ENSMUSG00000018796	Acsl1	protein_coding	8	Long-chain-fatty-acid--CoA ligase 1	587.039	0.354122	0.0800618	4.42393	9.69229e-06	8.94773e-05
ENSMUSG00000032883	Acsl3	protein_coding	1	Long-chain-fatty-acid--CoA ligase 3	6170.34	-0.0467356	0.0513462	-0.910236	0.362698	0.568034
ENSMUSG00000031278	Acsl4	protein_coding	X	Long-chain-fatty-acid--CoA ligase 4	5090.15	-0.746805	0.0485898	-15.3694	2.62682e-53	2.94387e-51
ENSMUSG00000024981	Acsl5	protein_coding	19	Long-chain-fatty-acid--CoA ligase 5	2894.62	0.028664	0.0499193	0.574184	0.565844	0.738237
ENSMUSG00000020333	Acsl6	protein_coding	11	Long-chain-fatty-acid--CoA ligase 6	161.566	-1.74757	0.212774	-8.13463	4.13196e-16	1.18995e-14
ENSMUSG00000030935	Acsm3	protein_coding	7	Acyl-coenzyme A synthetase ACSM3, mitochondrial	0.948473	0.493172	0.316744	1.43013	0.152679
ENSMUSG00000027605	Acss2	protein_coding	2	Acetyl-coenzyme A synthetase, cytoplasmic	295.423	-0.183294	0.0920584	-1.99199	0.0463719	0.1327
ENSMUSG00000035948	Acss3	protein_coding	10	Acyl-CoA synthetase short-chain family member 3, mitochondrial	8.60663	0.393298	0.380362	1.04639	0.295381	0.497499
ENSMUSG00000031972	Acta1	protein_coding	8	Actin, alpha skeletal muscle	28109	-1.95463	0.120657	-16.2162	3.87313e-59	5.48959e-57
ENSMUSG00000035783	Acta2	protein_coding	19	Actin, aortic smooth muscle Actin, aortic smooth muscle, intermediate form	30314.2	-0.576912	0.0536361	-10.7565	5.52209e-27	2.83095e-25
ENSMUSG00000029580	Actb	protein_coding	5	Actin, cytoplasmic 1 Actin, cytoplasmic 1, N-terminally processed	109248	-0.102627	0.0479085	-2.14214	0.0321825	0.0999705
ENSMUSG00000068614	Actc1	protein_coding	2	Actin, alpha cardiac muscle 1	11052.2	-3.26453	0.0924648	-35.1861	3.26105e-271	9.42899e-268
ENSMUSG00000062825	Actg1	protein_coding	11	Actin, cytoplasmic 2 Actin, cytoplasmic 2, N-terminally processed	134.34	-0.135802	0.14824	-0.914866	0.360262	0.565506
ENSMUSG00000059430	Actg2	protein_coding	6	Actin, gamma-enteric smooth muscle	1375.28	-0.0961118	0.0626819	-1.53314	0.125241	0.277487
ENSMUSG00000074978	Actg-ps1	processed_pseudogene	8	actin, gamma, pseudogene 1	6.84812	0.0736901	0.378906	0.186169	0.852313	0.924285
ENSMUSG00000027671	Actl6a	protein_coding	3	actin-like 6A	1907.44	-0.154761	0.0520311	-2.97412	0.00293833	0.0141598
ENSMUSG00000015143	Actn1	protein_coding	12	Mus musculus actinin, alpha 1 (Actn1), transcript variant 2, mRNA.	6012.29	-0.0330678	0.0636279	-0.519702	0.603271	0.767231
ENSMUSG00000052374	Actn2	protein_coding	13	Alpha-actinin-2	533.671	-1.74443	0.2657	-6.69579	2.14515e-11	4.24828e-10
ENSMUSG00000006457	Actn3	protein_coding	19	Alpha-actinin-3	7705.15	-1.41324	0.0681519	-20.7372	1.59943e-95	5.50546e-93
ENSMUSG00000054808	Actn4	protein_coding	7	Alpha-actinin-4	7013.89	-0.0646454	0.0528823	-1.22245	0.221538	0.410406
ENSMUSG00000021076	Actr10	protein_coding	12	Actin-related protein 10	2579.21	-0.112421	0.0423086	-2.65719	0.00787953	0.0320614
ENSMUSG00000025228	Actr1a	protein_coding	19	Alpha-centractin	4671.5	-0.00468308	0.0411793	-0.113717	0.909462	0.95304
ENSMUSG00000037351	Actr1b	protein_coding	1	Beta-centractin	3216.2	-0.145947	0.0383308	-3.80751	0.000140371	0.000998203
ENSMUSG00000020152	Actr2	protein_coding	11	Actin-related protein 2	5394.62	-0.178522	0.0651305	-2.74091	0.00612686	0.0260059
ENSMUSG00000026341	Actr3	protein_coding	1	Actin-related protein 3	3314.53	-0.156974	0.0432118	-3.63253	0.000280655	0.00184596
ENSMUSG00000056367	Actr3b	protein_coding	5	Actin-related protein 3B	39.294	0.386498	0.212959	1.80399	0.0712326	0.184158
ENSMUSG00000037761	Actr5	protein_coding	2	ARP5 actin related protein 5 homolog	216.851	0.0812687	0.100899	0.805251	0.420675	0.620508
ENSMUSG00000019948	Actr6	protein_coding	10	ARP6 actin related protein 6 homolog	456.238	0.0410173	0.079549	0.51557	0.606154	0.76964
ENSMUSG00000015971	Actr8	protein_coding	14	Actin-related protein 8	1199.38	-0.190281	0.0591387	-3.21763	0.00129254	0.0070674
ENSMUSG00000026836	Acvr1	protein_coding	2	Mus musculus activin A receptor, type 1 (Acvr1), transcript variant 5, mRNA.	372.569	-0.117623	0.0858769	-1.3702	0.170625	0.344708
ENSMUSG00000000532	Acvr1b	protein_coding	15	Activin receptor type-1B	399.564	0.1652	0.0844925	1.95544	0.0505314	0.142154
ENSMUSG00000026834	Acvr1c	protein_coding	2	Activin receptor type-1C	2.66518	0.585153	0.407626	1.58013	0.114078
ENSMUSG00000052155	Acvr2a	protein_coding	2	Activin receptor type-2A	816.406	-0.295606	0.0661028	-4.47303	7.71181e-06	7.21149e-05
ENSMUSG00000061393	Acvr2b	protein_coding	9	Activin receptor type-2B	29.7183	0.145738	0.272135	0.540471	0.588872	0.755531
ENSMUSG00000000530	Acvrl1	protein_coding	15	Serine/threonine-protein kinase receptor R3	5.35068	0.757009	0.400254	1.83938	0.0658591	0.174318
ENSMUSG00000023262	Acy1	protein_coding	9		185.863	0.0671354	0.111143	0.603949	0.545878	0.72412
ENSMUSG00000024866	Acy3	protein_coding	19	N-acyl-aromatic-L-amino acid amidohydrolase (carboxylate-forming)	40.3642	0.476968	0.235222	2.03449	0.0419021	0.122553
ENSMUSG00000008822	Acyp1	protein_coding	12	Acylphosphatase-1	254.708	0.028544	0.106414	0.26824	0.788515	0.888646
ENSMUSG00000060923	Acyp2	protein_coding	11	Acylphosphatase-2	83.3783	-0.172501	0.175081	-0.987898	0.323202	0.526852
ENSMUSG00000017697	Ada	protein_coding	2	Adenosine deaminase	105.115	0.109372	0.128744	0.847445	0.396747	0.599976
ENSMUSG00000027259	Adal	protein_coding	2	Adenosine deaminase-like protein	259.436	0.0984719	0.111574	0.882724	0.377386	0.581649
ENSMUSG00000054693	Adam10	protein_coding	9	Disintegrin and metalloproteinase domain-containing protein 10	3631.17	0.0371424	0.0618887	0.600157	0.548402	0.725697
ENSMUSG00000020926	Adam11	protein_coding	11	Disintegrin and metalloproteinase domain-containing protein 11	6.67218	0.66771	0.398576	1.71577	0.0862039	0.211983
ENSMUSG00000054555	Adam12	protein_coding	7	Disintegrin and metalloproteinase domain-containing protein 12	84.293	-0.285438	0.195805	-1.46825	0.142037	0.302196
ENSMUSG00000028041	Adam15	protein_coding	3	Disintegrin and metalloproteinase domain-containing protein 15	1358.34	0.491805	0.0793156	6.20022	5.63852e-10	9.5118e-09
ENSMUSG00000052593	Adam17	protein_coding	12	Disintegrin and metalloproteinase domain-containing protein 17	2973.68	-0.0557601	0.0409673	-1.36107	0.173493	0.348263
ENSMUSG00000011256	Adam19	protein_coding	11	Disintegrin and metalloproteinase domain-containing protein 19	878.673	-0.771781	0.0951999	-8.10924	5.09394e-16	1.4554e-14
ENSMUSG00000072647	Adam1a	protein_coding	5	Disintegrin and metalloproteinase domain-containing protein 1a	18.9784	0.224575	0.298023	0.751857	0.452137	0.647724
ENSMUSG00000008438	Adam21	protein_coding	12	Disintegrin and metalloproteinase domain-containing protein 21	2.1863	-0.502545	0.400615	-1.14864	0.250706
ENSMUSG00000040537	Adam22	protein_coding	5	Disintegrin and metalloproteinase domain-containing protein 22	7.32247	-0.182277	0.388393	-0.475695	0.634292	0.789359
ENSMUSG00000025964	Adam23	protein_coding	1	Disintegrin and metalloproteinase domain-containing protein 23	56.1025	2.00854	0.266049	7.20164	5.94907e-13	1.3587e-11
ENSMUSG00000037437	Adam32	protein_coding	8	Disintegrin and metalloproteinase domain-containing protein 32	5.89059	-0.0524174	0.400309	-0.134519	0.892992	0.944863
ENSMUSG00000072972	Adam4	protein_coding	12	a disintegrin and metallopeptidase domain 4	5.31045	-0.347765	0.399311	-0.836452	0.402901
ENSMUSG00000031554	Adam5	protein_coding	8	Disintegrin and metalloproteinase domain-containing protein 5	26.9548	0.194946	0.26323	0.743034	0.457461	0.652725
ENSMUSG00000025473	Adam8	protein_coding	7	Disintegrin and metalloproteinase domain-containing protein 8	262.057	0.416769	0.103913	4.00437	6.21838e-05	0.000488317
ENSMUSG00000031555	Adam9	protein_coding	8	Disintegrin and metalloproteinase domain-containing protein 9	5565.79	0.0988868	0.0384946	2.56886	0.0102033	0.0396317
ENSMUSG00000022893	Adamts1	protein_coding	16	A disintegrin and metalloproteinase with thrombospondin motifs 1	1032.25	0.107208	0.0760421	1.41038	0.158429	0.326454
ENSMUSG00000024299	Adamts10	protein_coding	17	Mus musculus a disintegrin-like and metallopeptidase (reprolysin type) with thrombospondin type 1 motif, 10 (Adamts10), transcript variant 4, mRNA.	324.597	0.315429	0.100534	3.13696	0.00170711	0.00894516
ENSMUSG00000047497	Adamts12	protein_coding	15	A disintegrin and metalloproteinase with thrombospondin motifs 12	46.6893	0.352484	0.239039	1.48774	0.136819	0.294871
ENSMUSG00000059901	Adamts14	protein_coding	10	a disintegrin-like and metallopeptidase (reprolysin type) with thrombospondin type 1 motif, 14	980.535	-0.384554	0.066654	-5.76941	7.95488e-09	1.15931e-07
ENSMUSG00000033453	Adamts15	protein_coding	9	A disintegrin and metalloproteinase with thrombospondin motifs 15	124.722	-1.1626	0.223384	-5.27205	1.34908e-07	1.67557e-06
ENSMUSG00000049538	Adamts16	protein_coding	13	A disintegrin and metalloproteinase with thrombospondin motifs 16	13.159	0.243751	0.34718	0.703231	0.481912	0.673791
ENSMUSG00000058145	Adamts17	protein_coding	7	a disintegrin-like and metallopeptidase (reprolysin type) with thrombospondin type 1 motif, 17	4.42428	0.507351	0.41225	1.77829	0.0753562
ENSMUSG00000036545	Adamts2	protein_coding	11	A disintegrin and metalloproteinase with thrombospondin motifs 2	517.508	-0.105863	0.101177	-1.05169	0.292943	0.49481
ENSMUSG00000043635	Adamts3	protein_coding	5	a disintegrin-like and metallopeptidase (reprolysin type) with thrombospondin type 1 motif, 3	4.16504	0.403455	0.410792	0.942136	0.346123
ENSMUSG00000006403	Adamts4	protein_coding	1	A disintegrin and metalloproteinase with thrombospondin motifs 4	1295.19	-0.708223	0.0688615	-10.2886	7.93114e-25	3.6285e-23
ENSMUSG00000022894	Adamts5	protein_coding	16	A disintegrin and metalloproteinase with thrombospondin motifs 5	621.841	-0.591665	0.111275	-5.33883	9.35472e-08	1.1926e-06
ENSMUSG00000046169	Adamts6	protein_coding	13	a disintegrin-like and metallopeptidase (reprolysin type) with thrombospondin type 1 motif, 6	1537.14	-0.372567	0.0561412	-6.6355	3.234e-11	6.27569e-10
ENSMUSG00000032363	Adamts7	protein_coding	9	A disintegrin and metalloproteinase with thrombospondin motifs 7	1447.12	-0.0976423	0.0702263	-1.39082	0.16428	0.334932
ENSMUSG00000031994	Adamts8	protein_coding	9	A disintegrin and metalloproteinase with thrombospondin motifs 8 isoform 2	2.2229	0.00182735	0.374543	0.00495452	0.996047
ENSMUSG00000030022	Adamts9	protein_coding	6	a disintegrin-like and metallopeptidase (reprolysin type) with thrombospondin type 1 motif, 9	3.646	0.106168	0.411051	0.352653	0.724349
ENSMUSG00000066113	Adamtsl1	protein_coding	4	ADAMTS-like protein 1	54.0276	-0.686947	0.282418	-2.531	0.0113738	0.0432941
ENSMUSG00000036040	Adamtsl2	protein_coding	2	ADAMTS-like protein 2	100.832	-0.509617	0.353871	-1.8293	0.0673544	0.176917
ENSMUSG00000070469	Adamtsl3	protein_coding	7	ADAMTS-like 3	711.559	0.991161	0.0983753	10.0828	6.57932e-24	2.87363e-22
ENSMUSG00000015850	Adamtsl4	protein_coding	3	ADAMTS-like protein 4	48.7059	0.674686	0.229558	2.93805	0.00330288	0.0156147
ENSMUSG00000043822	Adamtsl5	protein_coding	10	ADAMTS-like 5	830.736	0.52366	0.0840823	6.22903	4.69323e-10	7.99177e-09
ENSMUSG00000027951	Adar	protein_coding	3	Mus musculus adenosine deaminase, RNA-specific (Adar), transcript variant 4, mRNA.	602.294	0.255857	0.0709946	3.60365	0.000313777	0.00203603
ENSMUSG00000020262	Adarb1	protein_coding	10	Double-stranded RNA-specific editase 1	1063.15	-0.368364	0.0623767	-5.90498	3.5269e-09	5.37285e-08
ENSMUSG00000031949	Adat1	protein_coding	8	Mus musculus adenosine deaminase, tRNA-specific 1 (Adat1), transcript variant 3, mRNA.	86.0455	0.322037	0.152445	2.1096	0.034893	0.106401
ENSMUSG00000019808	Adat2	protein_coding	10	tRNA-specific adenosine deaminase 2	133.544	0.21525	0.13611	1.57971	0.114174	0.260103
ENSMUSG00000035370	Adat3	protein_coding	10	Probable inactive tRNA-specific adenosine deaminase-like protein 3	10.8268	-0.115546	0.346662	-0.322154	0.747336	0.862746
ENSMUSG00000021044	Adck1	protein_coding	12	Uncharacterized aarF domain-containing protein kinase 1	798.253	-0.0220681	0.067855	-0.325342	0.744922	0.861469
ENSMUSG00000046947	Adck2	protein_coding	6		134.809	0.320358	0.14907	2.15262	0.0313489	0.0979705
ENSMUSG00000022550	Adck5	protein_coding	15	aarF domain containing kinase 5	508.843	0.0433143	0.0846929	0.511434	0.609047	0.77115
ENSMUSG00000020431	Adcy1	protein_coding	11	Adenylate cyclase type 1	3.53085	0.303116	0.414071	0.736201	0.461608
ENSMUSG00000020654	Adcy3	protein_coding	12	Adenylate cyclase type 3	246.98	0.467504	0.0996031	4.69425	2.67583e-06	2.7397e-05
ENSMUSG00000022994	Adcy6	protein_coding	15	adenylate cyclase 6	2269.38	0.148936	0.0513698	2.89937	0.0037391	0.0173535
ENSMUSG00000031659	Adcy7	protein_coding	8	Adenylate cyclase type 7	11233.6	-0.443569	0.0330855	-13.4067	5.52775e-41	4.51495e-39
ENSMUSG00000005580	Adcy9	protein_coding	16	Adenylate cyclase type 9	461.431	-0.238185	0.0798985	-2.98181	0.0028655	0.0138689
ENSMUSG00000029106	Add1	protein_coding	5	Mus musculus adducin 1 (alpha) (Add1), transcript variant 5, mRNA.	6312.97	-0.0536185	0.0393153	-1.36381	0.172627	0.34707
ENSMUSG00000030000	Add2	protein_coding	6	Beta-adducin	256.248	-0.906994	0.11247	-8.05348	8.04725e-16	2.25027e-14
ENSMUSG00000025026	Add3	protein_coding	19	Gamma-adducin	1313.96	0.498308	0.0591848	8.41908	3.79468e-17	1.17473e-15
ENSMUSG00000031486	Adgra2	protein_coding	8	Adhesion G protein-coupled receptor A2	1787.75	-0.711366	0.0607786	-11.7073	1.16983e-31	7.22744e-30
ENSMUSG00000029090	Adgra3	protein_coding	5	Adhesion G protein-coupled receptor A3	2136.55	-0.163125	0.049304	-3.30845	0.000938148	0.00533969
ENSMUSG00000028782	Adgrb2	protein_coding	4	Adhesion G protein-coupled receptor B2	1.46096	0.565408	0.365075	1.42541	0.154038
ENSMUSG00000044017	Adgrd1	protein_coding	5	Adhesion G-protein coupled receptor D1	30.4294	0.91219	0.304211	3.0698	0.00214202	0.0108452
ENSMUSG00000002885	Adgre5	protein_coding	8	adhesion G protein-coupled receptor E5	4776.17	-0.926432	0.0465376	-19.9064	3.58299e-88	9.77346e-86
ENSMUSG00000067642	Adgrf3	protein_coding	5	Adhesion G-protein coupled receptor F3	16.1641	-0.358895	0.408133	-1.614	0.106527	0.248157
ENSMUSG00000023918	Adgrf4	protein_coding	17	adhesion G protein-coupled receptor F4	4.49741	-0.202896	0.41052	-0.738203	0.460391
ENSMUSG00000056492	Adgrf5	protein_coding	17	Mus musculus adhesion G protein-coupled receptor F5 (Adgrf5), transcript variant 2, mRNA.	6.77453	1.26277	0.385062	3.05073	0.00228287	0.0114317
ENSMUSG00000031785	Adgrg1	protein_coding	8	Adhesion G-protein coupled receptor G1 ADGRG1 N-terminal fragment ADGRG1 C-terminal fragment	128.255	-0.336688	0.175116	-1.93237	0.0533139	0.148251
ENSMUSG00000031298	Adgrg2	protein_coding	X	Adhesion G-protein coupled receptor G2	18.0515	1.01045	0.323384	3.13397	0.00172456	0.0090235
ENSMUSG00000060470	Adgrg3	protein_coding	8	Adhesion G protein-coupled receptor G3	164.642	-0.0189528	0.110609	-0.170629	0.864515	0.930279
ENSMUSG00000039116	Adgrg6	protein_coding	10	Adhesion G-protein coupled receptor G6 ADGRG6 N-terminal fragment ADGRG6 C-terminal fragment	2506.34	0.118342	0.0779349	1.51838	0.128918	0.28355
ENSMUSG00000013033	Adgrl1	protein_coding	8	Adhesion G protein-coupled receptor L1	1325.43	-0.0353639	0.0755348	-0.468219	0.639628	0.79278
ENSMUSG00000028184	Adgrl2	protein_coding	3	Adhesion G protein-coupled receptor L2	996.073	0.0241855	0.0840328	0.287751	0.773537	0.878617
ENSMUSG00000037605	Adgrl3	protein_coding	5	Adhesion G protein-coupled receptor L3	1190.5	-0.337227	0.0735606	-4.58801	4.47489e-06	4.3771e-05
ENSMUSG00000039167	Adgrl4	protein_coding	3	Adhesion G protein-coupled receptor L4	19.2853	0.517055	0.302004	1.71007	0.0872522	0.214197
ENSMUSG00000069170	Adgrv1	protein_coding	13	adhesion G protein-coupled receptor V1	2.45794	0.669353	0.412089	1.35099	0.1767
ENSMUSG00000074207	Adh1	protein_coding	3	Alcohol dehydrogenase 1	10.2849	1.0364	0.397124	2.65397	0.00795502	0.0323231
ENSMUSG00000028138	Adh5	protein_coding	3	Alcohol dehydrogenase class-3	2772.43	-0.0033348	0.0512697	-0.0650482	0.948136	0.974319
ENSMUSG00000055301	Adh7	protein_coding	3	Alcohol dehydrogenase class 4 mu/sigma chain	836.379	0.854514	0.0781278	10.9326	8.05347e-28	4.36064e-26
ENSMUSG00000025911	Adhfe1	protein_coding	1	Mus musculus alcohol dehydrogenase, iron containing, 1 (Adhfe1), transcript variant 2, mRNA.	9.93229	-0.166192	0.364331	-0.466929	0.640551	0.793254
ENSMUSG00000020629	Adi1	protein_coding	12	1,2-dihydroxy-3-keto-5-methylthiopentene dioxygenase	202.133	0.108409	0.115568	0.938022	0.348233	0.554084
ENSMUSG00000026457	Adipor1	protein_coding	1	adiponectin receptor 1	5000.93	-0.10288	0.0350898	-2.93197	0.00336824	0.0158718
ENSMUSG00000030168	Adipor2	protein_coding	6	adiponectin receptor 2	2128.79	0.0432486	0.0503386	0.859171	0.390246	0.594412
ENSMUSG00000039197	Adk	protein_coding	14	Adenosine kinase	1338.32	0.0332636	0.0559445	0.594563	0.552136	0.727419
ENSMUSG00000030790	Adm	protein_coding	7	ADM Adrenomedullin Proadrenomedullin N-20 terminal peptide	10.5646	-0.273353	0.373864	-0.773496	0.439229	0.635818
ENSMUSG00000054136	Adm2	protein_coding	15	ADM2 Adrenomedullin-2 Intermedin-short	4.75702	0.902309	0.406204	2.11143	0.0347358
ENSMUSG00000051149	Adnp	protein_coding	2	Activity-dependent neuroprotector homeobox protein	15.3549	-0.298721	0.319636	-0.928913	0.352934	0.558063
ENSMUSG00000053950	Adnp2	protein_coding	18	Activity-dependent neuroprotector homeobox protein 2	981.262	0.0568544	0.0537516	1.0578	0.290148	0.491871
ENSMUSG00000057134	Ado	protein_coding	10	2-aminoethanethiol dioxygenase	3055.55	-0.0836123	0.0379189	-2.20492	0.0274595	0.0881596
ENSMUSG00000042429	Adora1	protein_coding	1	adenosine A1 receptor	4.22389	-0.894369	0.41053	-3.0275	0.00246584
ENSMUSG00000020178	Adora2a	protein_coding	10	adenosine A2a receptor	33.7226	0.55945	0.223034	2.47571	0.0132973	0.0490655
ENSMUSG00000018500	Adora2b	protein_coding	11	adenosine A2b receptor	435.566	-1.38392	0.0947206	-14.5988	2.85835e-48	2.77337e-46
ENSMUSG00000025236	Adpgk	protein_coding	9	Mus musculus ADP-dependent glucokinase (Adpgk), transcript variant 2, mRNA.	426.26	0.120767	0.0775619	1.55675	0.119529	0.268661
ENSMUSG00000002844	Adprh	protein_coding	16	[Protein ADP-ribosylarginine] hydrolase	1475.68	-0.252529	0.0524236	-4.81758	1.45313e-06	1.55185e-05
ENSMUSG00000031448	Adprhl1	protein_coding	8	[Protein ADP-ribosylarginine] hydrolase-like protein 1	16.1428	0.0032228	0.406652	0.00510406	0.995928	0.997929
ENSMUSG00000042558	Adprhl2	protein_coding	4	Poly(ADP-ribose) glycohydrolase ARH3	685.887	-0.0250871	0.0662247	-0.378851	0.704799	0.837347
ENSMUSG00000020910	Adprm	protein_coding	11	Manganese-dependent ADP-ribose/CDP-alcohol diphosphatase	389.857	0.0679477	0.078798	0.86232	0.388511	0.59252
ENSMUSG00000050541	Adra1b	protein_coding	11	adrenoceptor alpha 1B	17.1774	-0.109749	0.305949	-0.357525	0.720699	0.847567
ENSMUSG00000027335	Adra1d	protein_coding	2	adrenoceptor alpha 1D	29.4341	-0.427506	0.291539	-1.5134	0.130177	0.285363
ENSMUSG00000035283	Adrb1	protein_coding	19	Beta-1 adrenergic receptor	20.7926	0.389679	0.263518	1.45698	0.145122	0.306865
ENSMUSG00000045730	Adrb2	protein_coding	18	Beta-2 adrenergic receptor	312.622	-0.710154	0.0923134	-7.68951	1.47697e-14	3.87524e-13
ENSMUSG00000039041	Adrm1	protein_coding	2	Proteasomal ubiquitin receptor ADRM1	193.918	-0.0782264	0.117304	-0.666715	0.504954	0.693532
ENSMUSG00000022407	Adsl	protein_coding	15	adenylosuccinate lyase	1850.06	0.00848529	0.0541293	0.156764	0.875431	0.935272
ENSMUSG00000015961	Adss	protein_coding	1	adenylosuccinate synthetase, non muscle	3249.03	-0.151236	0.0477823	-3.16487	0.00155154	0.00826778
ENSMUSG00000011148	Adssl1	protein_coding	12	adenylosuccinate synthetase like 1	616.486	0.183744	0.0960396	1.91481	0.055517	0.152645
ENSMUSG00000020473	Aebp1	protein_coding	11	Adipocyte enhancer-binding protein 1	1451.35	0.430071	0.0863534	4.98437	6.21648e-07	7.01026e-06
ENSMUSG00000030232	Aebp2	protein_coding	6	Zinc finger protein AEBP2	2390.64	0.0620988	0.0491462	1.26354	0.206397	0.392409
ENSMUSG00000030609	Aen	protein_coding	7	Apoptosis-enhancing nuclease	800.968	0.252562	0.0701043	3.60259	0.000315062	0.00204345
ENSMUSG00000054452	Aes	protein_coding	10	Amino-terminal enhancer of split	6204.56	-0.312021	0.0446296	-6.99135	2.72244e-12	5.9364e-11
ENSMUSG00000077711	AF357399	snoRNA	7	snoRNA AF357399	3.53827	-0.287425	0.412516	-0.640767	0.521674
ENSMUSG00000029094	Afap1	protein_coding	5	Actin filament-associated protein 1	659.574	0.104731	0.0899522	1.16431	0.244299	0.438464
ENSMUSG00000033032	Afap1l1	protein_coding	18	Actin filament-associated protein 1-like 1	183.104	-0.0126491	0.21487	-0.0630191	0.949751	0.975043
ENSMUSG00000025083	Afap1l2	protein_coding	19	Actin filament-associated protein 1-like 2	959.498	-0.390349	0.0697941	-5.59643	2.18807e-08	3.00408e-07
ENSMUSG00000068036	Afdn	protein_coding	17	Afadin	1560.35	0.226078	0.0667914	3.38475	0.000712424	0.0041885
ENSMUSG00000029313	Aff1	protein_coding	5	AF4/FMR2 family member 1	792.293	0.213162	0.0929119	2.29444	0.0217652	0.0732619
ENSMUSG00000037138	Aff3	protein_coding	1	AF4/FMR2 family member 3	7.12877	0.560308	0.408108	1.52211	0.127982	0.282047
ENSMUSG00000049470	Aff4	protein_coding	11	AF4/FMR2 family member 4	5248.83	-0.0157403	0.062831	-0.250531	0.802177	0.896635
ENSMUSG00000038302	Afg1l	protein_coding	10	AFG1-like ATPase	319.016	-0.0555738	0.0856854	-0.648523	0.516647	0.702385
ENSMUSG00000031967	Afg3l1	protein_coding	8	AFG3-like protein 1	1416.13	0.0110112	0.0657357	0.167508	0.86697	0.931534
ENSMUSG00000024527	Afg3l2	protein_coding	18	AFG3-like protein 2	1507.3	0.0280415	0.0531548	0.527555	0.597808	0.76253
ENSMUSG00000017718	Afmid	protein_coding	11	Kynurenine formamidase	41.9713	-0.0168066	0.226274	-0.0743668	0.940718	0.969503
ENSMUSG00000049659	Aftph	protein_coding	11	Aftiphilin	1591.31	0.116005	0.0461181	2.51537	0.0118907	0.0448132
ENSMUSG00000031521	Aga	protein_coding	8	N(4)-(beta-N-acetylglucosaminyl)-L-asparaginase Glycosylasparaginase alpha chain Glycosylasparaginase beta chain	765.349	-0.0919341	0.0689295	-1.33403	0.182195	0.361018
ENSMUSG00000055013	Agap1	protein_coding	1	Arf-GAP with GTPase, ANK repeat and PH domain-containing protein 1	2904.75	-0.916549	0.0613545	-14.939	1.83764e-50	1.89763e-48
ENSMUSG00000025422	Agap2	protein_coding	10	Arf-GAP with GTPase, ANK repeat and PH domain-containing protein 2	26.8769	-0.524953	0.291656	-1.83887	0.065935	0.174369
ENSMUSG00000023353	Agap3	protein_coding	5	arf-GAP with GTPase, ANK repeat and PH domain-containing protein 3 isoform b	1785.54	-0.122383	0.0447361	-2.73569	0.00622505	0.0263299
ENSMUSG00000038836	Agbl3	protein_coding	6	Cytosolic carboxypeptidase 3	143.419	-0.276551	0.130861	-2.11269	0.0346274	0.10577
ENSMUSG00000029165	Agbl5	protein_coding	5	Cytosolic carboxypeptidase-like protein 5	92.2392	0.0520497	0.165144	0.315311	0.752526	0.865862
ENSMUSG00000015452	Ager	protein_coding	17	Advanced glycosylation end product-specific receptor	7.29018	0.159564	0.386616	0.403108	0.686869	0.825794
ENSMUSG00000026159	Agfg1	protein_coding	1	Arf-GAP domain and FG repeat-containing protein 1	2903.85	-0.0885863	0.0454511	-1.94898	0.0512979	0.143779
ENSMUSG00000029722	Agfg2	protein_coding	5	Arf-GAP domain and FG repeat-containing protein 2	337.089	0.0518794	0.0890689	0.582408	0.560292	0.733908
ENSMUSG00000021681	Aggf1	protein_coding	13	Angiogenic factor with G patch and FHA domains 1	1456.76	-0.0944687	0.0516883	-1.82778	0.0675833	0.177098
ENSMUSG00000029916	Agk	protein_coding	6	Acylglycerol kinase, mitochondrial	188.964	0.0124966	0.10936	0.114276	0.909019	0.953011
ENSMUSG00000033400	Agl	protein_coding	3	amylo-1,6-glucosidase, 4-alpha-glucanotransferase	2428.47	-0.177359	0.0541687	-3.27461	0.00105808	0.00593583
ENSMUSG00000040706	Agmat	protein_coding	4	Agmatinase, mitochondrial	18.4135	-0.814757	0.380349	-2.41564	0.0157074	0.0562642
ENSMUSG00000041530	Ago1	protein_coding	4	Protein argonaute-1	931.646	0.0576221	0.0725842	0.793911	0.427247	0.625398
ENSMUSG00000036698	Ago2	protein_coding	15	Protein argonaute-2	1255.34	-0.17852	0.0750197	-2.37965	0.017329	0.0609552
ENSMUSG00000028842	Ago3	protein_coding	4	Protein argonaute-3	714.213	0.153639	0.0931973	1.64864	0.0992207	0.236588
ENSMUSG00000042500	Ago4	protein_coding	4	Protein argonaute-4	117.193	0.133436	0.148197	0.903247	0.366395	0.571346
ENSMUSG00000034254	Agpat1	protein_coding	17	1-acylglycerol-3-phosphate O-acyltransferase 1 (lysophosphatidic acid acyltransferase, alpha)	936.088	-0.124304	0.078105	-1.59144	0.11151	0.255807
ENSMUSG00000026922	Agpat2	protein_coding	2	1-acylglycerol-3-phosphate O-acyltransferase 2 (lysophosphatidic acid acyltransferase, beta)	534.043	0.163947	0.06789	2.41467	0.0157495	0.0563838
ENSMUSG00000001211	Agpat3	protein_coding	10	1-acyl-sn-glycerol-3-phosphate acyltransferase gamma	2735.64	-0.0475559	0.0445616	-1.06731	0.285833	0.486667
ENSMUSG00000023827	Agpat4	protein_coding	17	1-acyl-sn-glycerol-3-phosphate acyltransferase delta	1091.68	0.0961066	0.0530914	1.8102	0.0702644	0.182372
ENSMUSG00000031467	Agpat5	protein_coding	8	1-acyl-sn-glycerol-3-phosphate acyltransferase epsilon	862.542	-0.303978	0.0568875	-5.34298	9.14324e-08	1.16977e-06
ENSMUSG00000042410	Agps	protein_coding	2	alkylglycerone phosphate synthase	3744.16	0.0136255	0.0370905	0.367363	0.713348	0.843025
ENSMUSG00000041936	Agrn	protein_coding	4	Agrin Agrin N-terminal 110 kDa subunit Agrin C-terminal 110 kDa subunit Agrin C-terminal 90 kDa fragment Agrin C-terminal 22 kDa fragment	791.786	0.323376	0.0722813	4.4745	7.65921e-06	7.16693e-05
ENSMUSG00000021557	Agtpbp1	protein_coding	13	Cytosolic carboxypeptidase 1	1162.93	-0.0308742	0.0557645	-0.553624	0.579836	0.748797
ENSMUSG00000029007	Agtrap	protein_coding	4	Type-1 angiotensin II receptor-associated protein	454.721	0.273396	0.0788321	3.46809	0.000524176	0.00320423
ENSMUSG00000026491	Ahctf1	protein_coding	1	Protein ELYS	3911.69	0.0356288	0.0519104	0.686348	0.492493	0.683402
ENSMUSG00000027597	Ahcy	protein_coding	2	Adenosylhomocysteinase	65.7398	0.0500904	0.158451	0.315125	0.752667	0.865862
ENSMUSG00000027893	Ahcyl1	protein_coding	3	Mus musculus S-adenosylhomocysteine hydrolase-like 1 (Ahcyl1), transcript variant 5, mRNA.	2872.44	0.136488	0.0793767	1.71945	0.0855328	0.211015
ENSMUSG00000029772	Ahcyl2	protein_coding	6	S-adenosylhomocysteine hydrolase-like 2	660.778	0.176871	0.0648108	2.72938	0.00634544	0.0267296
ENSMUSG00000037692	Ahdc1	protein_coding	4	AT-hook DNA-binding motif-containing protein 1	762.18	-0.145107	0.0960427	-1.51176	0.130594	0.286147
ENSMUSG00000019986	Ahi1	protein_coding	10	Abelson helper integration site 1	597.978	0.216496	0.0755357	2.86604	0.00415639	0.0188553
ENSMUSG00000069833	Ahnak	protein_coding	19	AHNAK nucleoprotein (desmoyokin)	76104.1	-0.0697316	0.160201	-0.435369	0.663294	0.80881
ENSMUSG00000072812	Ahnak2	protein_coding	12	AHNAK nucleoprotein 2	1582.43	0.257879	0.0705586	3.65507	0.000257116	0.00170432
ENSMUSG00000019256	Ahr	protein_coding	12	aryl hydrocarbon receptor isoform 2	528.857	0.355627	0.0827631	4.30159	1.6958e-05	0.000148493
ENSMUSG00000021575	Ahrr	protein_coding	13	aryl-hydrocarbon receptor repressor	71.4369	1.08831	0.160741	6.71823	1.83943e-11	3.66463e-10
ENSMUSG00000021037	Ahsa1	protein_coding	12	Activator of 90 kDa heat shock 1	2730.41	0.0248798	0.0435545	0.571228	0.567845	0.740047
ENSMUSG00000020288	Ahsa2	protein_coding	11	Activator of 90 kDa heat shock 2	3450.58	-0.335873	0.041557	-8.08198	6.37228e-16	1.7993e-14
ENSMUSG00000035875	AI182371	protein_coding	2	expressed sequence AI182371	3.26739	0.319778	0.414255	0.744187	0.456763
ENSMUSG00000114780	AI197445	lincRNA	13	expressed sequence AI197445	4.0955	0.446301	0.409318	1.01745	0.308939
ENSMUSG00000050812	AI314180	protein_coding	4	Proteasome-associated	4653.59	-0.0500534	0.0465279	-1.07582	0.282007	0.482083
ENSMUSG00000062753	AI413582	protein_coding	17	expressed sequence AI413582	164.564	0.335882	0.118208	2.8397	0.00451558	0.0202048
ENSMUSG00000074384	AI429214	protein_coding	8	Uncharacterized	166.032	0.151058	0.124351	1.21536	0.22423	0.413904
ENSMUSG00000114828	AI463229	lincRNA	13	expressed sequence AI463229	5.27248	-0.579176	0.400963	-1.42049	0.155465
ENSMUSG00000046312	AI464131	protein_coding	4	Myosis-regulating glycosidase	1096.36	-0.912978	0.0777858	-11.7415	7.80943e-32	4.84553e-30
ENSMUSG00000045165	AI467606	protein_coding	7	Transmembrane	701.272	-0.541162	0.0658347	-8.21876	2.05611e-16	6.06636e-15
ENSMUSG00000090086	AI480526	lincRNA	5	expressed sequence AI480526	72.37	0.158522	0.185847	0.851537	0.394471	0.598357
ENSMUSG00000056145	AI504432	lincRNA	3	expressed sequence AI504432	40.5574	-0.53383	0.212377	-2.48347	0.0130109	0.0482427
ENSMUSG00000105987	AI506816	processed_transcript	5	expressed sequence AI506816	760.313	0.0287592	0.0969713	0.296615	0.766761	0.874078
ENSMUSG00000010290	AI597479	protein_coding	1	Ashwin	1217.55	-0.0810239	0.0543431	-1.4911	0.135936	0.29358
ENSMUSG00000074873	AI606181	protein_coding	19	expressed sequence AI606181	40.233	0.144699	0.22625	0.639859	0.522264	0.706384
ENSMUSG00000087107	AI662270	processed_transcript	11	expressed sequence AI662270	11.1387	0.27168	0.348414	0.778498	0.436276	0.63332
ENSMUSG00000047423	AI837181	protein_coding	19	UPF0696 isoform b	882.147	0.00547086	0.0656456	0.0833178	0.933599	0.965592
ENSMUSG00000107355	AI839979	lincRNA	5	expressed sequence AI839979	13.8997	0.682511	0.340573	2.00492	0.0449718	0.129569
ENSMUSG00000024970	AI846148	protein_coding	19	SPIN1-docking protein	414.56	-0.0789134	0.085435	-0.923879	0.355549	0.560876
ENSMUSG00000056383	AI987944	protein_coding	7	expressed sequence AI987944	580.233	0.184311	0.0791317	2.32929	0.0198439	0.0679818
ENSMUSG00000042901	Aida	protein_coding	1	Axin interactor, dorsalization-associated protein	1623.33	-0.129284	0.0538135	-2.40237	0.0162894	0.0578868
ENSMUSG00000001864	Aif1l	protein_coding	2	Allograft inflammatory factor 1-like	3534.09	-0.747786	0.0655889	-11.4025	4.06061e-30	2.34817e-28
ENSMUSG00000036932	Aifm1	protein_coding	X	Apoptosis-inducing factor 1, mitochondrial	1622.4	0.0105682	0.0578625	0.182647	0.855075	0.926048
ENSMUSG00000020085	Aifm2	protein_coding	10	Apoptosis-inducing factor 2	693.502	-0.146411	0.0661278	-2.21451	0.0267934	0.0864625
ENSMUSG00000019806	Aig1	protein_coding	10	Mus musculus androgen-induced 1 (Aig1), transcript variant 2, mRNA.	361.475	0.212727	0.0768751	2.76515	0.00568972	0.0244229
ENSMUSG00000037860	Aim2	protein_coding	1	Interferon-inducible protein AIM2	23.0865	0.0180997	0.262411	0.0694827	0.944605	0.972315
ENSMUSG00000028029	Aimp1	protein_coding	3	aminoacyl tRNA synthetase complex interacting multifunctional protein 1	1952.45	-0.0862434	0.0530928	-1.62437	0.104296	0.244734
ENSMUSG00000029610	Aimp2	protein_coding	5	Aminoacyl tRNA synthase complex-interacting multifunctional protein 2	658.89	-0.0668981	0.0792877	-0.843614	0.398885	0.601688
ENSMUSG00000024847	Aip	protein_coding	19	AH receptor-interacting protein	1128.98	0.0147152	0.0717157	0.205189	0.837424	0.915983
ENSMUSG00000040554	Aipl1	protein_coding	11	Aryl-hydrocarbon-interacting protein-like 1	10.4462	0.0924382	0.338692	0.267014	0.789458	0.889203
ENSMUSG00000078247	Airn	antisense	17	antisense Igf2r RNA	36.4723	-0.955903	0.255167	-3.75464	0.000173594	0.00120424
ENSMUSG00000022178	Ajuba	protein_coding	14	LIM domain-containing protein ajuba	1480.4	0.239883	0.0579177	4.14189	3.44462e-05	0.000285544
ENSMUSG00000026817	Ak1	protein_coding	2	Adenylate kinase isoenzyme 1	3744.76	0.0558835	0.0500849	1.11581	0.264504	0.462275
ENSMUSG00000028792	Ak2	protein_coding	4	Adenylate kinase 2, mitochondrial	1846.15	0.0753453	0.0511877	1.47181	0.141073	0.301186
ENSMUSG00000024782	Ak3	protein_coding	19	GTP:AMP phosphotransferase AK3, mitochondrial	2681.48	-0.171421	0.0430427	-3.98261	6.81613e-05	0.000530074
ENSMUSG00000028527	Ak4	protein_coding	4	Adenylate kinase 4, mitochondrial	240.745	-0.914252	0.0984836	-9.26931	1.87354e-20	7.14664e-19
ENSMUSG00000039058	Ak5	protein_coding	3	Adenylate kinase isoenzyme 5	6.89886	0.669104	0.389472	1.69782	0.0895415	0.218888
ENSMUSG00000078941	Ak6	protein_coding	13	Adenylate kinase isoenzyme 6	692.652	-0.12233	0.0689494	-1.77357	0.0761345	0.193272
ENSMUSG00000026807	Ak8	protein_coding	2	Adenylate kinase 8	2.35059	7.19472e-05	0.400725	-0.000114827	0.999908
ENSMUSG00000018428	Akap1	protein_coding	11	A-kinase anchor protein 1, mitochondrial	1188.42	0.134342	0.0568213	2.3645	0.0180542	0.062985
ENSMUSG00000047804	Akap10	protein_coding	11	A-kinase anchor protein 10, mitochondrial	856.289	-0.0015164	0.0607041	-0.0249753	0.980075	0.991251
ENSMUSG00000022016	Akap11	protein_coding	14	A kinase (PRKA) anchor protein 11	3390.92	-0.222051	0.0662715	-3.35068	0.000806133	0.00465426
ENSMUSG00000038587	Akap12	protein_coding	10	A-kinase anchor protein 12	2560.54	0.288197	0.0760166	3.79074	0.000150196	0.00105612
ENSMUSG00000066406	Akap13	protein_coding	7	A-kinase anchor protein 13	3823.03	-0.126908	0.104103	-1.21924	0.222753	0.41203
ENSMUSG00000059708	Akap17b	protein_coding	X	A-kinase anchor protein 17B	252.354	0.578377	0.102609	5.6339	1.76184e-08	2.43974e-07
ENSMUSG00000038729	Akap2	protein_coding	4	A-kinase anchor protein 2	2.26975	-0.729589	0.408332	-1.65158	0.0986201
ENSMUSG00000021057	Akap5	protein_coding	12	A-kinase anchor protein 5	5.82118	0.329301	0.396608	0.809897	0.417999	0.618654
ENSMUSG00000061603	Akap6	protein_coding	12	A kinase (PRKA) anchor protein 6	1880.12	-0.678231	0.115643	-5.86659	4.44852e-09	6.6992e-08
ENSMUSG00000039166	Akap7	protein_coding	10	Mus musculus A kinase (PRKA) anchor protein 7 (Akap7), transcript variant 2, mRNA.	738.33	-0.182734	0.0634796	-2.87868	0.00399344	0.0182758
ENSMUSG00000024045	Akap8	protein_coding	17	A-kinase anchor protein 8	1715.62	0.0591456	0.0459123	1.28819	0.197679	0.3813
ENSMUSG00000002625	Akap8l	protein_coding	17	A-kinase anchoring protein 8 like	777.055	0.00159638	0.0657162	0.024203	0.980691	0.991343
ENSMUSG00000040407	Akap9	protein_coding	5	A-kinase anchoring protein 9	3073.99	-0.124053	0.123835	-1.00194	0.316372	0.519985
ENSMUSG00000031023	Akip1	protein_coding	7	A-kinase-interacting protein 1	21.9185	0.222663	0.284238	0.77989	0.435456	0.632766
ENSMUSG00000023075	Akirin1	protein_coding	4	Akirin-1	1060.09	-0.153761	0.0594073	-2.58827	0.00964584	0.0379455
ENSMUSG00000028291	Akirin2	protein_coding	4	Akirin-2	1120.83	-0.0599895	0.0587023	-1.02196	0.306798	0.509287
ENSMUSG00000039158	Akna	protein_coding	4	AT-hook-containing transcription factor	100.149	-0.251833	0.154219	-1.63433	0.102189	0.241515
ENSMUSG00000049565	Aknad1	protein_coding	3	AKNA domain containing 1	34.7057	-0.471536	0.303227	-1.61779	0.105708	0.246727
ENSMUSG00000101940	Akp-ps1	transcribed_unprocessed_pseudogene	1	alkaline phosphatase pseudogene 1	1.91677	0.0996827	0.395106	0.256142	0.797841
ENSMUSG00000028692	Akr1a1	protein_coding	4	Alcohol dehydrogenase	11774.1	-0.0891118	0.0429142	-2.07652	0.0378463	0.113093
ENSMUSG00000061758	Akr1b10	protein_coding	6	aldo-keto reductase family 1, member B10 (aldose reductase)	421.28	-0.00460568	0.0778079	-0.0592404	0.952761	0.976681
ENSMUSG00000001642	Akr1b3	protein_coding	6	Aldose reductase	907.642	-0.555884	0.0693728	-8.01332	1.11655e-15	3.08642e-14
ENSMUSG00000052131	Akr1b7	protein_coding	6	Aldose reductase-related protein 1	2.75732	0.410552	0.401199	1.49223	0.13564
ENSMUSG00000029762	Akr1b8	protein_coding	6	Aldose reductase-related protein 2	2746.04	-0.363684	0.0455962	-7.97634	1.50739e-15	4.14302e-14
ENSMUSG00000021211	Akr1c12	protein_coding	13	aldo-keto reductase family 1, member C12	4.06441	0.340796	0.412483	0.840204	0.400794
ENSMUSG00000021213	Akr1c13	protein_coding	13	Aldo-keto reductase family 1 member C13	29.3227	-0.00810497	0.248403	-0.032692	0.97392	0.988276
ENSMUSG00000033715	Akr1c14	protein_coding	13	aldo-keto reductase family 1, member C14	132.426	0.289873	0.16884	1.73008	0.0836162	0.207295
ENSMUSG00000045410	Akr1e1	protein_coding	13	1,5-anhydro-D-fructose reductase	251.164	0.0584753	0.104268	0.560793	0.574939	0.744927
ENSMUSG00000028743	Akr7a5	protein_coding	4	Aflatoxin B1 aldehyde reductase member 2	622.384	0.062211	0.0730695	0.851528	0.394476	0.598357
ENSMUSG00000001729	Akt1	protein_coding	12	Mus musculus thymoma viral proto-onco 1 (Akt1), transcript variant 3, mRNA.	6797.18	-0.17457	0.0388421	-4.49439	6.97704e-06	6.57115e-05
ENSMUSG00000011096	Akt1s1	protein_coding	7	Proline-rich AKT1 substrate 1	954.395	0.00797923	0.0712921	0.111891	0.91091	0.953867
ENSMUSG00000004056	Akt2	protein_coding	7	Mus musculus thymoma viral proto-onco 2 (Akt2), transcript variant 4, mRNA.	1474.91	-0.318533	0.0563989	-5.64925	1.6115e-08	2.25313e-07
ENSMUSG00000084347	Akt2-ps	processed_pseudogene	11	thymoma viral proto-oncogene 2, pseudogene	18.986	-0.342381	0.310408	-1.12071	0.262411	0.460163
ENSMUSG00000019699	Akt3	protein_coding	1	RAC-gamma serine/threonine-protein kinase	1385.67	-0.00128633	0.0572443	-0.0224863	0.98206	0.992287
ENSMUSG00000031667	Aktip	protein_coding	8	Mus musculus thymoma viral proto-onco 1 interacting protein (Aktip), transcript variant 6, mRNA.	1386.98	0.0276657	0.0548652	0.504303	0.614049	0.775107
ENSMUSG00000116262	AL589670.3	antisense	15		12.6983	0.257832	0.346439	0.758239	0.448308	0.644254
ENSMUSG00000116287	AL589670.4	lincRNA	15		1.07362	-0.00222307	0.331425	0.00460256	0.996328
ENSMUSG00000116307	AL590144.3	antisense	15		16.4099	0.668603	0.31108	2.13155	0.033044	0.102098
ENSMUSG00000116185	AL591892.1	TEC	15		2.80894	-0.389736	0.41368	-0.854892	0.392611
ENSMUSG00000116508	AL591952.3	antisense	15		81.4841	0.126086	0.165425	0.763415	0.445216	0.64144
ENSMUSG00000116298	AL603843.1	TEC	15		47.4645	-0.115036	0.207627	-0.55059	0.581914	0.750095
ENSMUSG00000113515	AL645745.1	lincRNA	13		14.4581	0.113127	0.35352	0.33194	0.739934	0.85887
ENSMUSG00000115955	AL731707.1	TEC	2		1.97891	0.0146543	0.391359	0.036818	0.97063
ENSMUSG00000028393	Alad	protein_coding	4	Delta-aminolevulinic acid dehydratase	1067.05	0.033571	0.05334	0.629344	0.529124	0.711423
ENSMUSG00000032786	Alas1	protein_coding	9	5-aminolevulinate synthase, nonspecific, mitochondrial	1035.53	0.366521	0.0648869	5.64948	1.60938e-08	2.25235e-07
ENSMUSG00000022636	Alcam	protein_coding	16	CD166 antigen	1285.22	0.29431	0.0650749	4.52173	6.13372e-06	5.86089e-05
ENSMUSG00000007833	Aldh16a1	protein_coding	7	aldehyde dehydrogenase 16 family, member A1	610.905	-0.236653	0.0723446	-3.27068	0.00107288	0.00600489
ENSMUSG00000025007	Aldh18a1	protein_coding	19	Delta-1-pyrroline-5-carboxylate synthase Glutamate 5-kinase Gamma-glutamyl phosphate reductase	1791.24	0.161229	0.0486216	3.31568	0.000914216	0.00522611
ENSMUSG00000015134	Aldh1a3	protein_coding	7	Aldehyde dehydrogenase family 1 member A3	78.0447	2.08661	0.19278	10.6454	1.83132e-26	9.12946e-25
ENSMUSG00000030088	Aldh1l1	protein_coding	6	Mus musculus aldehyde dehydrogenase 1 family, member L1 (Aldh1l1), transcript variant 2, mRNA.	8.67631	-0.205726	0.373315	-0.55746	0.577213	0.746669
ENSMUSG00000020256	Aldh1l2	protein_coding	10	Mitochondrial 10-formyltetrahydrofolate dehydrogenase	1170.35	0.70205	0.0700744	10.0147	1.31412e-23	5.63747e-22
ENSMUSG00000029455	Aldh2	protein_coding	5	Aldehyde dehydrogenase, mitochondrial	4566.34	0.347709	0.0539312	6.44732	1.13846e-10	2.05478e-09
ENSMUSG00000019102	Aldh3a1	protein_coding	11	Mus musculus aldehyde dehydrogenase family 3, subfamily A1 (Aldh3a1), transcript variant 3, mRNA.	664.256	0.34402	0.0683684	5.03052	4.89162e-07	5.57275e-06
ENSMUSG00000010025	Aldh3a2	protein_coding	11	Fatty aldehyde dehydrogenase	2011.39	0.292515	0.0445099	6.57165	4.97602e-11	9.39142e-10
ENSMUSG00000024885	Aldh3b1	protein_coding	19	Aldehyde dehydrogenase family 3 member B1	981.404	-1.36398	0.0900072	-15.1519	7.36149e-52	7.94217e-50
ENSMUSG00000075296	Aldh3b2	protein_coding	19	Aldehyde dehydrogenase family 3 member B2	1.79584	-0.129338	0.357529	-0.511778	0.608806
ENSMUSG00000037263	Aldh3b3	protein_coding	19	Aldehyde dehydrogenase family 3 member B3	11.1513	-0.828093	0.409715	-2.55506	0.0106171	0.0408983
ENSMUSG00000028737	Aldh4a1	protein_coding	4	Delta-1-pyrroline-5-carboxylate dehydrogenase, mitochondrial	285.286	0.0921314	0.114026	0.807848	0.419178	0.61952
ENSMUSG00000035936	Aldh5a1	protein_coding	13	aldhehyde dehydrogenase family 5, subfamily A1	110.633	0.402098	0.136216	2.94413	0.00323864	0.0153904
ENSMUSG00000021238	Aldh6a1	protein_coding	12	Methylmalonate-semialdehyde dehydrogenase	681.826	-0.00639321	0.0708843	-0.0904651	0.927918	0.962833
ENSMUSG00000053644	Aldh7a1	protein_coding	18	Alpha-aminoadipic semialdehyde dehydrogenase	592.898	0.124007	0.0783532	1.58305	0.113409	0.25885
ENSMUSG00000026687	Aldh9a1	protein_coding	1	aldehyde dehydrogenase 9 family member A1	588.286	0.179092	0.0657574	2.72298	0.0064696	0.0271419
ENSMUSG00000114515	Aldoa	protein_coding	7		19.1177	0.178423	0.275974	0.637386	0.523874	0.70742
ENSMUSG00000030695	Aldoa	protein_coding	7	Fructose-bisphosphate aldolase A	25514.6	-0.421803	0.0431045	-9.78561	1.29809e-22	5.39269e-21
ENSMUSG00000111336	Aldoa-ps4	processed_pseudogene	9	aldolase A, pseudogene 4	11.9839	-0.521824	0.371703	-1.41638	0.156665	0.324028
ENSMUSG00000059343	Aldoart1	protein_coding	4	aldolase 1 A, retrogene 1	10.7737	-0.743228	0.353115	-2.07833	0.0376789	0.112709
ENSMUSG00000063129	Aldoart2	protein_coding	12	aldolase 1 A, retrogene 2	3.39771	-0.787127	0.413371	-1.83683	0.0662353
ENSMUSG00000017390	Aldoc	protein_coding	11	Fructose-bisphosphate aldolase C	62.9012	-0.0565338	0.186607	-0.30325	0.761699	0.871814
ENSMUSG00000039427	Alg1	protein_coding	16	Chitobiosyldiphosphodolichol beta-mannosyltransferase	434.339	0.058823	0.0779678	0.75456	0.450513	0.646265
ENSMUSG00000063362	Alg11	protein_coding	8	GDP-Man:Man(3)GlcNAc(2)-PP-Dol alpha-1,2-mannosyltransferase	716.895	-0.0810612	0.0596923	-1.35788	0.174501	0.349704
ENSMUSG00000035845	Alg12	protein_coding	15	Dol-P-Man:Man(7)GlcNAc(2)-PP-Dol alpha-1,6-mannosyltransferase	184.134	-0.0422766	0.119932	-0.352451	0.7245	0.849964
ENSMUSG00000041718	Alg13	protein_coding	X	Putative bifunctional UDP-N-acetylglucosamine transferase and deubiquitinase ALG13	277.079	-0.160788	0.0957688	-1.67714	0.0935145	0.225921
ENSMUSG00000039887	Alg14	protein_coding	3	UDP-N-acetylglucosamine transferase subunit ALG14 homolog	766.069	-0.0399438	0.0590367	-0.676468	0.498744	0.687909
ENSMUSG00000039740	Alg2	protein_coding	4	Alpha-1,3/1,6-mannosyltransferase ALG2	290.995	0.222942	0.104737	2.12919	0.0332385	0.102502
ENSMUSG00000033809	Alg3	protein_coding	16	Mus musculus asparagine-linked glycosylation 3 (alpha-1,3-mannosyltransferase) (Alg3), transcript variant 3, mRNA.	115.378	0.160003	0.136739	1.16968	0.242129	0.436031
ENSMUSG00000036632	Alg5	protein_coding	3	Dolichyl-phosphate beta-glucosyltransferase	782.158	0.162227	0.0807082	2.00992	0.0444394	0.128364
ENSMUSG00000073792	Alg6	protein_coding	4	Dolichyl pyrophosphate Man9GlcNAc2 alpha-1,3-glucosyltransferase	331.249	0.0156878	0.0861487	0.18212	0.855488	0.926048
ENSMUSG00000035704	Alg8	protein_coding	7	Probable dolichyl pyrophosphate Glc1Man9GlcNAc2 alpha-1,3-glucosyltransferase	151.967	-0.0816019	0.13209	-0.616579	0.537512	0.717063
ENSMUSG00000032059	Alg9	protein_coding	9	Alpha-1,2-mannosyltransferase ALG9	662.673	-0.0771356	0.0665704	-1.15856	0.246636	0.441235
ENSMUSG00000087247	Alkal1	protein_coding	1	ALK and LTK ligand 1	3.28464	0.593432	0.413887	1.40838	0.159017
ENSMUSG00000079036	Alkbh1	protein_coding	12	Nucleic acid dioxygenase ALKBH1	502.713	-0.0113534	0.0849847	-0.133594	0.893723	0.945245
ENSMUSG00000044339	Alkbh2	protein_coding	5	DNA oxidative demethylase ALKBH2	56.5552	-0.0523505	0.194893	-0.267755	0.788888	0.888998
ENSMUSG00000040174	Alkbh3	protein_coding	2	Alpha-ketoglutarate-dependent dioxygenase alkB homolog 3	604.571	-0.0140672	0.0717557	-0.196045	0.844575	0.920064
ENSMUSG00000039754	Alkbh4	protein_coding	5	Mus musculus alkB homolog 4, lysine demethylase (Alkbh4), transcript variant 1, mRNA.	150.738	0.0770786	0.130104	0.592652	0.553414	0.728396
ENSMUSG00000042650	Alkbh5	protein_coding	11	RNA demethylase ALKBH5	2761.95	-0.157375	0.0581424	-2.70679	0.00679364	0.0282472
ENSMUSG00000042831	Alkbh6	protein_coding	7	Alpha-ketoglutarate-dependent dioxygenase alkB homolog 6	205.564	0.106212	0.115113	0.923343	0.355829	0.561044
ENSMUSG00000002661	Alkbh7	protein_coding	17	Alpha-ketoglutarate-dependent dioxygenase alkB homolog 7, mitochondrial	221.4	-0.302526	0.123975	-2.44255	0.0145838	0.0529326
ENSMUSG00000025899	Alkbh8	protein_coding	9	Alkylated DNA repair 8	597.935	0.122263	0.0746173	1.63855	0.101306	0.239821
ENSMUSG00000063810	Alms1	protein_coding	6	Alstrom syndrome	743.37	-0.135649	0.0869789	-1.55919	0.118951	0.267696
ENSMUSG00000000320	Alox12	protein_coding	11	arachidonate 12-lipoxygenase	7.33068	0.240431	0.374762	0.619882	0.535335	0.715068
ENSMUSG00000025701	Alox5	protein_coding	6	Arachidonate 5-lipoxygenase	3096.03	-0.261744	0.0497769	-5.25801	1.45625e-07	1.80094e-06
ENSMUSG00000060063	Alox5ap	protein_coding	5	Arachidonate 5-lipoxygenase-activating protein	330.462	-0.618225	0.0915678	-6.74692	1.51019e-11	3.05781e-10
ENSMUSG00000020891	Alox8	protein_coding	11	Arachidonate 8S-lipoxygenase	3.64977	0.696158	0.410764	1.50748	0.131689
ENSMUSG00000028028	Alpk1	protein_coding	3	alpha kinase 1	482.232	0.203159	0.0847226	2.39889	0.0164451	0.0582718
ENSMUSG00000032845	Alpk2	protein_coding	18	Alpha-protein kinase 2	202.043	-0.286498	0.111622	-2.56483	0.0103227	0.0399454
ENSMUSG00000038763	Alpk3	protein_coding	7	alpha kinase 3	415.989	-1.82059	0.192092	-9.43418	3.94052e-21	1.55226e-19
ENSMUSG00000026024	Als2	protein_coding	1	Alsin	1520.36	0.0414087	0.0538253	0.769308	0.44171	0.638198
ENSMUSG00000044037	Als2cl	protein_coding	9	ALS2 C-terminal like	171.104	0.401309	0.142912	2.81096	0.00493934	0.0217774
ENSMUSG00000025134	Alyref	protein_coding	11	THO complex subunit 4	2984.79	-0.134052	0.0507756	-2.63987	0.00829369	0.0335202
ENSMUSG00000060244	Alyref2	protein_coding	1		81.4644	-0.226282	0.165747	-1.36775	0.171389	0.345816
ENSMUSG00000022244	Amacr	protein_coding	15	Alpha-methylacyl-CoA racemase	1210.94	-0.975684	0.0634634	-15.3745	2.42694e-53	2.74111e-51
ENSMUSG00000040506	Ambra1	protein_coding	2	Activating molecule in BECN1-regulated autophagy protein 1	629.174	0.237872	0.0892189	2.66666	0.00766092	0.0313247
ENSMUSG00000075232	Amd1	protein_coding	10	S-adenosylmethionine decarboxylase proenzyme 1 S-adenosylmethionine decarboxylase 1 alpha chain S-adenosylmethionine decarboxylase 1 beta chain	347.809	0.123672	0.0886861	1.39352	0.163462	0.333828
ENSMUSG00000015890	Amdhd1	protein_coding	10	Probable imidazolonepropionase	7.48424	-0.852379	0.382269	-2.09943	0.0357789	0.108306
ENSMUSG00000036820	Amdhd2	protein_coding	17	N-acetylglucosamine-6-phosphate deacetylase	366.97	0.00625063	0.0914287	0.0683171	0.945533	0.972938
ENSMUSG00000019836	Amd-ps4	processed_pseudogene	4	S-adenosylmethionine decarboxylase, pseudogene 4	104.886	0.644528	0.160172	4.01259	6.00558e-05	0.000473923
ENSMUSG00000050332	Amer1	protein_coding	X	APC membrane recruitment protein 1	634.203	-0.0914057	0.0754709	-1.21148	0.225711	0.415523
ENSMUSG00000031751	Amfr	protein_coding	8	E3 ubiquitin-protein ligase AMFR	8087.26	-0.0346176	0.0370684	-0.933908	0.350351	0.555803
ENSMUSG00000035262	Amh	protein_coding	10	anti-Mullerian hormone	5.04091	0.0578404	0.403748	0.138134	0.890134
ENSMUSG00000023047	Amhr2	protein_coding	15	Mus musculus anti-Mullerian hormone type 2 receptor (Amhr2), transcript variant 2, mRNA.	3.67886	0.00434063	0.411801	0.00956092	0.992372
ENSMUSG00000050947	Amigo1	protein_coding	3	Amphoterin-induced protein 1	185.153	-0.246132	0.130845	-1.88602	0.0592924	0.160553
ENSMUSG00000048218	Amigo2	protein_coding	15	Amphoterin-induced protein 2	78.964	-0.133484	0.162226	-0.822162	0.410985	0.612773
ENSMUSG00000032593	Amigo3	protein_coding	9	Amphoterin-induced protein 3	30.4274	-0.008895	0.246348	-0.0363786	0.970981	0.987025
ENSMUSG00000042225	Ammecr1	protein_coding	X	AMME syndrome candidate 1 protein homolog	1333.63	-0.213776	0.0684434	-3.12403	0.00178393	0.00929381
ENSMUSG00000041915	Ammecr1l	protein_coding	18	AMMECR1-like protein	1430.99	0.0641318	0.049446	1.29693	0.194655	0.376724
ENSMUSG00000068250	Amn1	protein_coding	6	antagonist of mitotic exit network 1	622.738	-0.0526624	0.0836688	-0.629367	0.529109	0.711423
ENSMUSG00000041688	Amot	protein_coding	X	Angiomotin	1264.45	-0.0858171	0.0705463	-1.21701	0.223599	0.413224
ENSMUSG00000013076	Amotl1	protein_coding	9	Angiomotin-like protein 1	4786.61	-0.740417	0.0572982	-12.9229	3.34108e-38	2.583e-36
ENSMUSG00000032531	Amotl2	protein_coding	9	Angiomotin-like protein 2	1971.36	0.271252	0.0621388	4.36607	1.265e-05	0.000113449
ENSMUSG00000070385	Ampd1	protein_coding	3	AMP deaminase 1	30.8852	-1.15129	0.380663	-3.05132	0.00227839	0.0114133
ENSMUSG00000027889	Ampd2	protein_coding	3	Mus musculus adenosine monophosphate deaminase 2 (Ampd2), transcript variant 4, mRNA.	741.121	-0.0842788	0.066728	-1.26298	0.206597	0.392686
ENSMUSG00000005686	Ampd3	protein_coding	7	AMP deaminase 3	353.188	0.0422823	0.100598	0.420379	0.674209	0.816882
ENSMUSG00000032607	Amt	protein_coding	9	Aminomethyltransferase, mitochondrial	23.6944	0.166665	0.28347	0.585315	0.558336	0.732142
ENSMUSG00000074264	Amy1	protein_coding	3	Alpha-amylase 1	4.57094	0.358546	0.414123	1.03503	0.300653
ENSMUSG00000050022	Amz1	protein_coding	5	Archaemetzincin-1	15.146	0.207562	0.317576	0.650636	0.515282	0.701123
ENSMUSG00000020610	Amz2	protein_coding	11	archaelysin family metallopeptidase 2	1127.77	-0.0105401	0.0525712	-0.200493	0.841095	0.918039
ENSMUSG00000014355	Anapc1	protein_coding	2	Anaphase-promoting complex subunit 1	5661.98	-0.124705	0.0509003	-2.44993	0.0142884	0.0520321
ENSMUSG00000036977	Anapc10	protein_coding	8	Mus musculus anaphase promoting complex subunit 10 (Anapc10), transcript variant 4, mRNA.	710.6	-0.0136665	0.0779907	-0.175272	0.860866	0.928958
ENSMUSG00000025135	Anapc11	protein_coding	11	Anaphase-promoting complex subunit 11	730.52	-0.0130242	0.0650276	-0.200274	0.841266	0.918039
ENSMUSG00000035048	Anapc13	protein_coding	9	Anaphase-promoting complex subunit 13	486.494	-0.281457	0.0881827	-3.19269	0.00140955	0.00761336
ENSMUSG00000030649	Anapc15	protein_coding	7	Anaphase-promoting complex subunit 15	242.982	-0.0214953	0.0895061	-0.239738	0.810533	0.901521
ENSMUSG00000020107	Anapc16	protein_coding	10	Anaphase-promoting complex subunit 16	1343.25	-0.107177	0.0556258	-1.92683	0.0540008	0.149672
ENSMUSG00000026965	Anapc2	protein_coding	2	Anaphase-promoting complex subunit 2	1735	0.191666	0.0615764	3.11268	0.00185397	0.00960329
ENSMUSG00000029176	Anapc4	protein_coding	5	Anaphase-promoting complex subunit 4	3027.55	-0.100628	0.0491254	-2.04835	0.0405258	0.1193
ENSMUSG00000029472	Anapc5	protein_coding	5	Anaphase-promoting complex subunit 5	8351.95	-0.10057	0.0354646	-2.83574	0.00457191	0.0204189
ENSMUSG00000029466	Anapc7	protein_coding	5	Anaphase-promoting complex subunit 7	1288.85	-0.0945208	0.0550743	-1.71636	0.0860966	0.2119
ENSMUSG00000072115	Ang	protein_coding	14	Angiogenin	18.4913	0.0877534	0.295847	0.296186	0.767088	0.874175
ENSMUSG00000047894	Ang2	protein_coding	14	Angiogenin-2	5.05826	0.567381	0.394325	1.30852	0.190698
ENSMUSG00000021257	Angel1	protein_coding	12	1	59.3814	0.239752	0.181736	1.31734	0.187725	0.368091
ENSMUSG00000026634	Angel2	protein_coding	1	Mus musculus angel homolog 2 (Angel2), transcript variant 3, mRNA.	1279.57	-0.094619	0.0520547	-1.81771	0.0691078	0.180179
ENSMUSG00000022309	Angpt1	protein_coding	15	Angiopoietin-1	5719.95	-0.26537	0.0404475	-6.56192	5.31206e-11	9.96062e-10
ENSMUSG00000031465	Angpt2	protein_coding	8	Angiopoietin-2	38.5471	-0.312119	0.209901	-1.47132	0.141204	0.301267
ENSMUSG00000027460	Angpt4	protein_coding	2	Angiopoietin-4	49.199	0.350465	0.279971	1.30497	0.191904	0.373129
ENSMUSG00000004105	Angptl2	protein_coding	2	Angiopoietin-related protein 2	8754.66	0.413861	0.0429915	9.62649	6.18054e-22	2.52407e-20
ENSMUSG00000002289	Angptl4	protein_coding	17	Angiopoietin-related protein 4	2339.65	1.61922	0.0519758	31.1443	6.06173e-213	7.96677e-210
ENSMUSG00000038742	Angptl6	protein_coding	9	Angiopoietin-related protein 6	36.6575	0.176272	0.241717	0.734108	0.462883	0.657422
ENSMUSG00000022265	Ank	protein_coding	15	Progressive ankylosis protein	6169.47	-0.283022	0.0450662	-6.28048	3.37532e-10	5.83697e-09
ENSMUSG00000031543	Ank1	protein_coding	8	Ankyrin-1	897.342	-1.13936	0.0755893	-15.0724	2.4596e-51	2.59551e-49
ENSMUSG00000032826	Ank2	protein_coding	3	Ankyrin-2	653.974	0.651436	0.0784864	8.29794	1.05936e-16	3.20402e-15
ENSMUSG00000069601	Ank3	protein_coding	10	Ankyrin-3	915.975	0.0424389	0.0639238	0.663913	0.506746	0.694674
ENSMUSG00000020790	Ankfy1	protein_coding	11	Rabankyrin-5	2796.06	-0.0504532	0.0632131	-0.798156	0.42478	0.623329
ENSMUSG00000024483	Ankhd1	protein_coding	18	ankyrin repeat and KH domain containing 1	1214.53	0.133721	0.0726857	1.83981	0.0657957	0.174242
ENSMUSG00000040351	Ankib1	protein_coding	5	Ankyrin repeat and IBR domain-containing protein 1	2837.2	0.222258	0.0490125	4.53476	5.76695e-06	5.54709e-05
ENSMUSG00000046295	Ankle1	protein_coding	8	Ankyrin repeat and LEM domain-containing protein 1	106.031	-0.00146194	0.153162	-0.00962784	0.992318	0.996454
ENSMUSG00000029501	Ankle2	protein_coding	5	Ankyrin repeat and LEM domain-containing protein 2	2610.56	0.033976	0.0457569	0.742537	0.457762	0.652801
ENSMUSG00000034212	Ankmy1	protein_coding	1	Mus musculus ankyrin repeat and MYND domain containing 1 (Ankmy1), transcript variant 2, mRNA.	13.6699	-0.085726	0.407061	-0.318885	0.749814	0.863994
ENSMUSG00000036188	Ankmy2	protein_coding	12	Ankyrin repeat and MYND domain-containing protein 2	670.609	0.0848673	0.065462	1.29653	0.194793	0.376891
ENSMUSG00000021661	Ankra2	protein_coding	13	Ankyrin repeat family A protein 2	461.611	0.188666	0.087507	2.15646	0.0310479	0.097261
ENSMUSG00000024803	Ankrd1	protein_coding	19	Ankyrin repeat domain-containing protein 1	13844.6	0.107457	0.051186	2.09934	0.0357872	0.108306
ENSMUSG00000031508	Ankrd10	protein_coding	8	Ankyrin repeat domain-containing protein 10	1487.35	-0.611041	0.0709154	-8.61816	6.80375e-18	2.20542e-16
ENSMUSG00000035569	Ankrd11	protein_coding	8	Ankyrin repeat domain-containing protein 11	3740.31	0.052836	0.057738	0.915102	0.360138	0.565373
ENSMUSG00000034647	Ankrd12	protein_coding	17	ankyrin repeat domain 12	899.88	0.135456	0.0729655	1.85693	0.0633213	0.168806
ENSMUSG00000041870	Ankrd13a	protein_coding	5	Ankyrin repeat domain-containing protein 13A	2161.97	-0.0455901	0.0542219	-0.840778	0.400472	0.602792
ENSMUSG00000037907	Ankrd13b	protein_coding	11	Ankyrin repeat domain-containing protein 13B	395.574	0.248295	0.0898936	2.76247	0.00573655	0.0245874
ENSMUSG00000039988	Ankrd13c	protein_coding	3	Ankyrin repeat domain-containing protein 13C	2121.42	-0.0639997	0.0517038	-1.23782	0.215783	0.403465
ENSMUSG00000005986	Ankrd13d	protein_coding	19	Ankyrin repeat domain-containing protein 13D	91.1465	0.321902	0.155863	2.06404	0.0390136	0.115954
ENSMUSG00000047909	Ankrd16	protein_coding	2	Ankyrin repeat domain-containing protein 16	335.152	0.233798	0.182804	1.27882	0.20096	0.385264
ENSMUSG00000055204	Ankrd17	protein_coding	5	Ankyrin repeat domain-containing protein 17	2643.16	0.0528448	0.0681719	0.775175	0.438236	0.634817
ENSMUSG00000025172	Ankrd2	protein_coding	19	Ankyrin repeat domain-containing protein 2	635.601	-1.27712	0.23204	-5.67	1.42799e-08	2.01017e-07
ENSMUSG00000067653	Ankrd23	protein_coding	1	Ankyrin repeat domain-containing protein 23	32.9679	-0.29968	0.360333	-0.967752	0.333168	0.537365
ENSMUSG00000054708	Ankrd24	protein_coding	10	Ankyrin repeat domain-containing protein 24	157.945	0.396464	0.131231	3.01998	0.00252788	0.0124601
ENSMUSG00000007827	Ankrd26	protein_coding	6		629.115	0.0839374	0.071778	1.16935	0.242262	0.436078
ENSMUSG00000034867	Ankrd27	protein_coding	7	Ankyrin repeat domain-containing protein 27	744.959	0.0473716	0.0668743	0.70835	0.478728	0.671548
ENSMUSG00000014496	Ankrd28	protein_coding	14	Serine/threonine-protein phosphatase 6 regulatory ankyrin repeat subunit A	2591.41	0.0290755	0.0415328	0.70006	0.48389	0.67581
ENSMUSG00000057766	Ankrd29	protein_coding	18	ankyrin repeat domain 29	68.0443	0.155861	0.176317	0.883078	0.377194	0.581416
ENSMUSG00000022237	Ankrd33b	protein_coding	15	Ankyrin repeat domain-containing protein 33B	778.745	0.0910747	0.0694358	1.31172	0.189615	0.370591
ENSMUSG00000049097	Ankrd34a	protein_coding	3	ankyrin repeat domain 34A	8.32256	-0.236574	0.366862	-0.638697	0.52302	0.706795
ENSMUSG00000038354	Ankrd35	protein_coding	3	ankyrin repeat domain 35	36.1716	-0.0678169	0.20656	-0.3256	0.744727	0.86146
ENSMUSG00000050914	Ankrd37	protein_coding	8	Ankyrin repeat domain-containing protein 37	83.3789	-0.915551	0.165113	-5.52912	3.21832e-08	4.32812e-07
ENSMUSG00000079610	Ankrd39	protein_coding	1	Ankyrin repeat domain-containing protein 39	100.883	0.0318174	0.15185	0.209645	0.833945	0.913913
ENSMUSG00000020864	Ankrd40	protein_coding	11	Ankyrin repeat domain-containing protein 40	2258.91	-0.0682377	0.0479453	-1.42328	0.154655	0.321059
ENSMUSG00000041343	Ankrd42	protein_coding	7	Ankyrin repeat domain-containing protein 42	145.099	0.57272	0.127256	4.49838	6.84725e-06	6.46576e-05
ENSMUSG00000052331	Ankrd44	protein_coding	1	Serine/threonine-protein phosphatase 6 regulatory ankyrin repeat subunit B	434.542	0.281461	0.0945933	2.97662	0.00291443	0.0140741
ENSMUSG00000044835	Ankrd45	protein_coding	1	Ankyrin repeat domain-containing protein 45	1.30467	-0.380102	0.363441	-1.0184	0.308487
ENSMUSG00000048307	Ankrd46	protein_coding	15	Ankyrin repeat domain-containing protein 46	1701.75	0.0508504	0.0496418	1.02436	0.305665	0.507872
ENSMUSG00000031931	Ankrd49	protein_coding	9	Ankyrin repeat domain-containing protein 49	682.014	0.0961868	0.0704511	1.36517	0.1722	0.346678
ENSMUSG00000044864	Ankrd50	protein_coding	3	ankyrin repeat domain 50	2779.36	-0.119532	0.0429084	-2.78597	0.0053368	0.0231973
ENSMUSG00000014498	Ankrd52	protein_coding	10	Serine/threonine-protein phosphatase 6 regulatory ankyrin repeat subunit C	598.026	0.099248	0.0871121	1.13918	0.254627	0.450633
ENSMUSG00000033055	Ankrd54	protein_coding	15	Ankyrin repeat domain-containing protein 54	559.447	0.153499	0.071514	2.14616	0.0318605	0.0992261
ENSMUSG00000049985	Ankrd55	protein_coding	13	Ankyrin repeat domain-containing protein 55	8.63404	0.45047	0.376045	1.19772	0.231025	0.422402
ENSMUSG00000040183	Ankrd6	protein_coding	4	Mus musculus ankyrin repeat domain 6 (Ankrd6), transcript variant 4, mRNA.	152.579	0.0408779	0.115265	0.354361	0.723068	0.849248
ENSMUSG00000029607	Ankrd61	protein_coding	5	Ankyrin repeat domain-containing protein 61	2.3483	-0.236641	0.407521	-0.502247	0.615494
ENSMUSG00000037904	Ankrd9	protein_coding	12	Ankyrin repeat domain-containing protein 9	205.772	0.0220865	0.106584	0.207153	0.83589	0.915066
ENSMUSG00000024219	Anks1	protein_coding	17	Ankyrin repeat and SAM domain-containing protein 1A	594.485	-0.0130685	0.0710624	-0.183982	0.854027	0.925371
ENSMUSG00000058589	Anks1b	protein_coding	10	ankyrin repeat and sterile alpha motif domain-containing protein 1B isoform 6	5.22355	-0.090522	0.394145	-0.219264	0.826444
ENSMUSG00000022515	Anks3	protein_coding	16	Ankyrin repeat and SAM domain-containing protein 3	550.827	-0.094156	0.0738113	-1.27616	0.201898	0.386297
ENSMUSG00000066191	Anks6	protein_coding	4	Ankyrin repeat and SAM domain-containing protein 6	61.9455	0.451629	0.205106	2.20176	0.0276821	0.0887164
ENSMUSG00000026199	Ankzf1	protein_coding	1	ankyrin repeat and zinc finger domain-containing protein 1 isoform 2	489.009	-0.0213557	0.0767773	-0.278162	0.780888	0.884324
ENSMUSG00000036777	Anln	protein_coding	9	Anillin	5138.85	0.0853423	0.0616217	1.38484	0.166101	0.33771
ENSMUSG00000031075	Ano1	protein_coding	7	Anoctamin-1	77.1552	0.468386	0.162321	2.87459	0.00404555	0.0184384
ENSMUSG00000037949	Ano10	protein_coding	9	Anoctamin-10	1231.82	0.239077	0.0543642	4.39797	1.09266e-05	9.94125e-05
ENSMUSG00000074968	Ano3	protein_coding	2	Anoctamin-3	10.7789	0.533911	0.371649	1.49408	0.135155	0.292768
ENSMUSG00000055489	Ano5	protein_coding	7	Anoctamin-5	1733.54	-2.26483	0.0669812	-33.7814	3.6996e-250	7.64074e-247
ENSMUSG00000064210	Ano6	protein_coding	15	Anoctamin-6	3647.59	0.0212634	0.0705983	0.301187	0.763272	0.872233
ENSMUSG00000034863	Ano8	protein_coding	8	Anoctamin-8	1552.81	0.0413537	0.0593617	0.696615	0.486044	0.677733
ENSMUSG00000032249	Anp32a	protein_coding	9	Acidic leucine-rich nuclear phosphoprotein 32 family member A	2181.47	0.0617636	0.0701984	0.879817	0.378958	0.582954
ENSMUSG00000028333	Anp32b	protein_coding	4	Acidic leucine-rich nuclear phosphoprotein 32 family member B	704.038	0.207547	0.161779	1.28213	0.199798	0.383677
ENSMUSG00000015749	Anp32e	protein_coding	3	Acidic leucine-rich nuclear phosphoprotein 32 family member E	2667.18	-0.224297	0.0721247	-3.10954	0.00187376	0.009685
ENSMUSG00000039062	Anpep	protein_coding	7	Aminopeptidase N	56.7305	-0.1029	0.204888	-0.504685	0.61378	0.774906
ENSMUSG00000033420	Antxr1	protein_coding	6	Anthrax toxin receptor 1	375.754	-0.170515	0.0984041	-1.73487	0.0827643	0.205765
ENSMUSG00000029338	Antxr2	protein_coding	5	Anthrax toxin receptor 2	3075.9	-0.291769	0.0414517	-7.03886	1.93823e-12	4.25851e-11
ENSMUSG00000024659	Anxa1	protein_coding	19	Annexin A1	25217	-0.25941	0.0442624	-5.86069	4.60951e-09	6.92002e-08
ENSMUSG00000021866	Anxa11	protein_coding	14	Annexin A11	473.356	-0.559395	0.0918124	-6.09738	1.07821e-09	1.7534e-08
ENSMUSG00000055114	Anxa13	processed_transcript	15		2.90893	-0.0646348	0.414116	-0.139511	0.889047
ENSMUSG00000032231	Anxa2	protein_coding	9	Annexin A2	31064.7	0.129829	0.0504782	2.57198	0.010112	0.0394359
ENSMUSG00000029484	Anxa3	protein_coding	5	Annexin A3	8326.37	0.34471	0.0465107	7.41124	1.25124e-13	3.06597e-12
ENSMUSG00000029994	Anxa4	protein_coding	6	Mus musculus annexin A4 (Anxa4), transcript variant 1, mRNA.	7632.19	-0.000702808	0.0379308	-0.0185233	0.985221	0.992983
ENSMUSG00000027712	Anxa5	protein_coding	3	Annexin A5	8849.25	-0.141256	0.046276	-3.05245	0.00226978	0.011378
ENSMUSG00000018340	Anxa6	protein_coding	11	Annexin A6	27271.8	-0.543209	0.0315956	-17.1925	3.02272e-66	4.91006e-64
ENSMUSG00000021814	Anxa7	protein_coding	14	Annexin A7	6383.53	0.0729287	0.0357913	2.0376	0.0415899	0.121911
ENSMUSG00000021950	Anxa8	protein_coding	14	Annexin A8	1627.59	1.60312	0.126187	12.7029	5.69731e-37	4.2239e-35
ENSMUSG00000015702	Anxa9	protein_coding	3	Annexin A9	42.2965	-0.443359	0.215146	-2.05487	0.039892	0.117938
ENSMUSG00000078651	Aoc2	protein_coding	11	Retina-specific copper amine oxidase	13.9333	0.0453421	0.336415	0.134454	0.893043	0.944863
ENSMUSG00000019326	Aoc3	protein_coding	11	Membrane primary amine oxidase	11.5131	-0.238262	0.382533	-0.677531	0.498069	0.687575
ENSMUSG00000063558	Aox1	protein_coding	1	aldehyde oxidase 1	336.862	0.802137	0.0998427	8.03131	9.64402e-16	2.68122e-14
ENSMUSG00000079554	Aox2	protein_coding	1	Aldehyde oxidase 2	2.73888	-0.263519	0.40799	-0.728216	0.466481
ENSMUSG00000064294	Aox3	protein_coding	1	Aldehyde oxidase 3	2.06274	0.115384	0.388039	0.404929	0.68553
ENSMUSG00000074238	Ap1ar	protein_coding	3	adaptor-related protein complex 1 associated regulatory protein	1145.89	0.00650974	0.053995	0.120567	0.904034	0.950832
ENSMUSG00000009090	Ap1b1	protein_coding	11	Mus musculus adaptor protein complex AP-1, beta 1 subunit (Ap1b1), transcript variant 4, mRNA.	1968.02	-0.209154	0.0497431	-4.2049	2.61203e-05	0.000220961
ENSMUSG00000031731	Ap1g1	protein_coding	8	AP-1 complex subunit gamma-1	1146.02	-0.0166021	0.0810826	-0.204725	0.837787	0.916137
ENSMUSG00000040701	Ap1g2	protein_coding	14	AP-1 complex subunit gamma-like 2	123.442	0.193756	0.131165	1.47525	0.140147	0.299852
ENSMUSG00000003033	Ap1m1	protein_coding	8	AP-1 complex subunit mu-1	975.459	0.112214	0.0644848	1.74013	0.0818366	0.204161
ENSMUSG00000004849	Ap1s1	protein_coding	5	AP-1 complex subunit sigma-1A	1608.51	0.00703313	0.0492254	0.142907	0.886364	0.9414
ENSMUSG00000031367	Ap1s2	protein_coding	X	AP-1 complex subunit sigma-2	1027.47	-0.154779	0.0535828	-2.88822	0.0038743	0.0178492
ENSMUSG00000054702	Ap1s3	protein_coding	1	AP-1 complex subunit sigma-3	15.3393	0.0280599	0.304581	0.0912666	0.927281	0.962805
ENSMUSG00000060279	Ap2a1	protein_coding	7	AP-2 complex subunit alpha-1	1279.99	-0.000708165	0.0638495	-0.0111068	0.991138	0.99603
ENSMUSG00000002957	Ap2a2	protein_coding	7	Mus musculus adaptor-related protein complex 2, alpha 2 subunit (Ap2a2), transcript variant 1, mRNA.	6000.51	0.0058487	0.0368185	0.158857	0.873782	0.934339
ENSMUSG00000035152	Ap2b1	protein_coding	11	AP-2 complex subunit beta	5897.46	-0.134691	0.0563777	-2.3891	0.0168899	0.059672
ENSMUSG00000022841	Ap2m1	protein_coding	16	AP-2 complex subunit mu	835.658	0.134476	0.0631182	2.13029	0.0331474	0.10233
ENSMUSG00000008036	Ap2s1	protein_coding	7	AP-2 complex subunit sigma	1460.49	-0.0743395	0.0523814	-1.41912	0.155863	0.323097
ENSMUSG00000021686	Ap3b1	protein_coding	13	AP-3 complex subunit beta-1	1873.53	0.223885	0.0535068	4.18437	2.85953e-05	0.000239653
ENSMUSG00000020198	Ap3d1	protein_coding	10	AP-3 complex subunit delta-1	3758.13	0.105191	0.0376534	2.79373	0.00521039	0.0227229
ENSMUSG00000021824	Ap3m1	protein_coding	14	AP-3 complex subunit mu-1	935.247	-0.0119572	0.0535187	-0.223385	0.823236	0.908196
ENSMUSG00000094683	Ap3m1-ps	processed_pseudogene	10	adaptor-related protein complex 3, mu 1 subunit, pseudogene	1.82155	0.104069	0.390112	0.313357	0.754009
ENSMUSG00000031539	Ap3m2	protein_coding	8	AP-3 complex subunit mu-2	449.135	0.239522	0.0785852	3.04874	0.002298	0.0114916
ENSMUSG00000024480	Ap3s1	protein_coding	18	AP-3 complex subunit sigma-1	517.958	-0.431901	0.0759424	-5.68789	1.28618e-08	1.81762e-07
ENSMUSG00000063801	Ap3s2	protein_coding	7	AP-3 complex subunit sigma-2	592.781	-0.125778	0.0669629	-1.87849	0.0603145	0.162589
ENSMUSG00000032952	Ap4b1	protein_coding	3	AP-4 complex subunit beta-1	111.646	0.26066	0.145039	1.79719	0.072305	0.186264
ENSMUSG00000001998	Ap4e1	protein_coding	2	AP-4 complex subunit epsilon-1	817.895	-0.174585	0.0656533	-2.65904	0.00783628	0.0319124
ENSMUSG00000019518	Ap4m1	protein_coding	5	AP-4 complex subunit mu-1	747.555	-0.0461616	0.065719	-0.702472	0.482385	0.674365
ENSMUSG00000020955	Ap4s1	protein_coding	12	AP-4 complex subunit sigma-1	213.985	-0.179132	0.114831	-1.56164	0.118373	0.266852
ENSMUSG00000049562	Ap5b1	protein_coding	19	AP-5 complex subunit beta-1	107.287	0.193023	0.155073	1.24595	0.212783	0.399819
ENSMUSG00000036291	Ap5m1	protein_coding	14	adaptor related protein complex 5 mu 1 subunit	740.508	-0.0593975	0.0750972	-0.791008	0.428939	0.626566
ENSMUSG00000068264	Ap5s1	protein_coding	2	Mus musculus adaptor-related protein 5 complex, sigma 1 subunit (Ap5s1), transcript variant 5, mRNA.	182.301	-0.214244	0.11853	-1.80816	0.070582	0.182966
ENSMUSG00000039623	Ap5z1	protein_coding	5	AP-5 complex subunit zeta-1	238.587	0.266145	0.102916	2.58677	0.00968797	0.0380595
ENSMUSG00000019979	Apaf1	protein_coding	10	Apoptotic protease-activating factor 1	1308.36	-0.188982	0.073406	-2.57414	0.010049	0.0392644
ENSMUSG00000024897	Apba1	protein_coding	19	Amyloid-beta A4 protein-binding family A member 1	14.009	0.785351	0.360139	2.26868	0.0232877	0.0773954
ENSMUSG00000004931	Apba3	protein_coding	10	Amyloid-beta A4 protein-binding family A member 3	1252.22	-0.105548	0.0524922	-2.01067	0.0443599	0.128237
ENSMUSG00000037032	Apbb1	protein_coding	7	Amyloid-beta A4 protein-binding family B member 1	1140.13	0.0670374	0.0552623	1.21324	0.22504	0.414886
ENSMUSG00000026786	Apbb1ip	protein_coding	2	amyloid beta (A4) precursor protein-binding, family B, member 1 interacting protein	22.648	-0.345281	0.282081	-1.23247	0.217773	0.405976
ENSMUSG00000029207	Apbb2	protein_coding	5	Amyloid-beta A4 protein-binding family B member 2	1126.87	-0.133851	0.0797407	-1.67867	0.0932167	0.225395
ENSMUSG00000005871	Apc	protein_coding	18	APC, WNT signaling pathway regulator	2437.65	-0.0989918	0.116716	-0.848214	0.396319	0.599642
ENSMUSG00000020135	Apc2	protein_coding	10	APC2, WNT signaling pathway regulator	125.409	0.847292	0.14974	5.65626	1.54707e-08	2.16725e-07
ENSMUSG00000071847	Apcdd1	protein_coding	18	Protein APCDD1	137.219	-0.862933	0.143145	-6.02327	1.70928e-09	2.72149e-08
ENSMUSG00000026542	Apcs	protein_coding	1	serum amyloid P-component	4.46383	-0.237326	0.405307	-1.13177	0.257731
ENSMUSG00000032590	Apeh	protein_coding	9	Acylamino-acid-releasing enzyme	1141.7	0.0995154	0.0522287	1.90542	0.0567259	0.155202
ENSMUSG00000035960	Apex1	protein_coding	14	DNA-(apurinic or apyrimidinic site) lyase DNA-(apurinic or apyrimidinic site) lyase, mitochondrial	1746.66	-0.209167	0.055986	-3.73585	0.000187079	0.00128607
ENSMUSG00000025269	Apex2	protein_coding	X	DNA-(apurinic or apyrimidinic site) lyase 2	204.357	-0.317037	0.104573	-3.02854	0.00245739	0.0121624
ENSMUSG00000015750	Aph1a	protein_coding	3	Gamma-secretase subunit APH-1A	214.136	0.111237	0.108201	1.02801	0.303944	0.506396
ENSMUSG00000032375	Aph1b	protein_coding	9	Gamma-secretase subunit APH-1B	529.505	0.0753374	0.0716272	1.05171	0.292935	0.49481
ENSMUSG00000053040	Aph1c	protein_coding	9	Putative gamma-secretase subunit APH-1C	24.4035	-0.48419	0.280703	-1.73275	0.08314	0.20638
ENSMUSG00000027193	Api5	protein_coding	2	Apoptosis inhibitor 5	3077.52	-0.122752	0.0384417	-3.19312	0.00140746	0.00760946
ENSMUSG00000010911	Apip	protein_coding	2	Methylthioribulose-1-phosphate dehydratase	443.926	0.0866435	0.0897841	0.965014	0.334538	0.538843
ENSMUSG00000030051	Aplf	protein_coding	6	Aprataxin and PNK-like factor	388.663	0.169871	0.0796794	2.13119	0.0330732	0.102145
ENSMUSG00000037010	Apln	protein_coding	X	Apelin Apelin-36 Apelin-31 Apelin-28 Apelin-13	124.006	-0.773554	0.148656	-5.19767	2.01806e-07	2.44144e-06
ENSMUSG00000044338	Aplnr	protein_coding	2	Apelin receptor	2.77312	-0.387209	0.412145	-0.932196	0.351235
ENSMUSG00000006651	Aplp1	protein_coding	7	amyloid beta precursor like protein 1	53.3707	0.202574	0.212389	0.956928	0.338603	0.543065
ENSMUSG00000031996	Aplp2	protein_coding	9	Amyloid-like protein 2	3474.14	0.128379	0.0526666	2.43767	0.0147821	0.0534932
ENSMUSG00000033096	Apmap	protein_coding	2	Adipocyte plasma membrane-associated protein	974.6	-0.132811	0.056779	-2.33947	0.0193111	0.0666142
ENSMUSG00000020609	Apob	protein_coding	12	Apolipoprotein B-100 Apolipoprotein B-48	1.66693	-0.563325	0.385642	-1.42844	0.153167
ENSMUSG00000040613	Apobec1	protein_coding	6	apolipoprotein B mRNA editing enzyme, catalytic polypeptide 1	72.0616	0.111937	0.189127	0.593666	0.552735	0.727746
ENSMUSG00000040694	Apobec2	protein_coding	17	apolipoprotein B mRNA editing enzyme, catalytic polypeptide 2	799.058	-1.93286	0.13119	-14.6927	7.18121e-49	7.11088e-47
ENSMUSG00000009585	Apobec3	protein_coding	15	apolipoprotein B mRNA editing enzyme, catalytic polypeptide 3	313.701	-0.127166	0.0891069	-1.42688	0.153615	0.319587
ENSMUSG00000042759	Apobr	protein_coding	7	Apolipoprotein B receptor	80.0354	1.0613	0.16265	6.48983	8.59342e-11	1.5726e-09
ENSMUSG00000022548	Apod	protein_coding	16	Apolipoprotein D	56.8396	-0.728642	0.197947	-3.67522	0.000237645	0.0015891
ENSMUSG00000002985	Apoe	protein_coding	7	Apolipoprotein E	50.423	0.147072	0.293769	0.53585	0.592062	0.758248
ENSMUSG00000000049	Apoh	protein_coding	11	Beta-2-glycoprotein 1	3.76641	0.809401	0.413214	2.03783	0.0415667
ENSMUSG00000050014	Apol10b	protein_coding	15	apolipoprotein L 10B	125.505	0.136414	0.155166	0.880775	0.37844	0.582342
ENSMUSG00000091650	Apol11a	protein_coding	15	apolipoprotein L 11a	14.9553	-0.244859	0.337478	-0.74777	0.454599	0.649935
ENSMUSG00000033576	Apol6	protein_coding	15	apolipoprotein L 6	27.6823	0.068773	0.32252	0.22415	0.822641	0.907877
ENSMUSG00000010601	Apol7a	protein_coding	15	apolipoprotein L 7a	19.265	0.32734	0.286443	1.11964	0.262867	0.460695
ENSMUSG00000073652	Apol7d	antisense	1	apolipoprotein L 7d	6.50095	0.311195	0.391372	0.798948	0.424321	0.623061
ENSMUSG00000056656	Apol8	protein_coding	15	apolipoprotein L 8	4.54503	0.769952	0.412247	1.93362	0.0531594
ENSMUSG00000057346	Apol9a	protein_coding	15	apolipoprotein L 9a	120.713	-0.723309	0.143574	-5.03548	4.7665e-07	5.44307e-06
ENSMUSG00000068246	Apol9b	protein_coding	15	apolipoprotein L 9b	110.244	-0.978624	0.158194	-6.17087	6.79165e-10	1.13642e-08
ENSMUSG00000090698	Apold1	protein_coding	6	apolipoprotein L domain containing 1	11.8506	0.158215	0.343355	0.458423	0.646649	0.797469
ENSMUSG00000051716	Apon	protein_coding	10	apolipoprotein N	1.84818	0.167767	0.398286	0.38944	0.696951
ENSMUSG00000079508	Apoo	protein_coding	X	MICOS complex subunit Mic26	47.511	-0.286813	0.217185	-1.31602	0.188167	0.368716
ENSMUSG00000025525	Apool	protein_coding	X	MICOS complex subunit Mic27	1023.51	-0.224255	0.066355	-3.37991	0.00072509	0.00425258
ENSMUSG00000049233	Apoo-ps	processed_pseudogene	13	apolipoprotein O, pseudogene	5.59785	-0.447931	0.40945	-1.08582	0.277557	0.476954
ENSMUSG00000037787	Apopt1	protein_coding	12	Apoptogenic protein 1, mitochondrial	612.83	0.00235073	0.0689012	0.0341068	0.972792	0.987671
ENSMUSG00000022892	App	protein_coding	16	amyloid beta (A4) precursor protein	9458.49	0.0091917	0.0412847	0.222628	0.823825	0.90821
ENSMUSG00000018481	Appbp2	protein_coding	11	Amyloid protein-binding protein 2	1373.98	0.0517402	0.0543459	0.952065	0.341064	0.546005
ENSMUSG00000085628	Appbp2os	antisense	11	amyloid beta precursor protein (cytoplasmic tail) binding protein 2, opposite strand	3.46036	0.521319	0.413578	1.15219	0.249242
ENSMUSG00000040760	Appl1	protein_coding	14	DCC-interacting protein 13-alpha	1423.28	-0.0349297	0.0587488	-0.594514	0.552168	0.727419
ENSMUSG00000020263	Appl2	protein_coding	10	DCC-interacting protein 13-beta	856.844	0.10426	0.0676369	1.54211	0.123047	0.274367
ENSMUSG00000006589	Aprt	protein_coding	8	Adenine phosphoribosyltransferase	1804.19	-0.00757942	0.0502399	-0.150809	0.880126	0.937832
ENSMUSG00000028411	Aptx	protein_coding	4	Aprataxin	571.344	-0.000581679	0.071695	-0.00813683	0.993508	0.996817
ENSMUSG00000004655	Aqp1	protein_coding	6	Aquaporin-1	3374.46	-0.059082	0.0625524	-0.944412	0.344959	0.55045
ENSMUSG00000042797	Aqp11	protein_coding	7	Aquaporin-11	11.5563	-0.127471	0.344739	-0.369521	0.711739	0.841962
ENSMUSG00000023013	Aqp2	protein_coding	15	Aquaporin-2	4.15745	-0.745587	0.411847	-1.81179	0.0700193
ENSMUSG00000044217	Aqp5	protein_coding	15	Aquaporin-5	2898.54	-0.349774	0.0552077	-6.33572	2.36236e-10	4.14978e-09
ENSMUSG00000040383	Aqr	protein_coding	2	Intron-binding protein aquarius	1560.59	-0.0412685	0.0612058	-0.674351	0.500088	0.68905
ENSMUSG00000046532	Ar	protein_coding	X	Androgen receptor	93.7462	-0.466257	0.192532	-2.42742	0.0152065	0.0547547
ENSMUSG00000001127	Araf	protein_coding	X	Serine/threonine-protein kinase A-Raf	1503.9	0.166028	0.061212	2.7126	0.00667567	0.0278207
ENSMUSG00000032812	Arap1	protein_coding	7	Arf-GAP with Rho-GAP domain, ANK repeat and PH domain-containing protein 1	763.715	0.165871	0.0703737	2.35732	0.0184072	0.0640155
ENSMUSG00000037999	Arap2	protein_coding	5	ArfGAP with RhoGAP domain, ankyrin repeat and PH domain 2	113.035	0.409193	0.14998	2.73254	0.00628475	0.0265358
ENSMUSG00000024451	Arap3	protein_coding	18	Arf-GAP with Rho-GAP domain, ANK repeat and PH domain-containing protein 3	34.9084	0.0535548	0.236638	0.224987	0.821989	0.907638
ENSMUSG00000022602	Arc	protein_coding	15	Activity-regulated cytoskeleton-associated protein	70.3285	-0.325891	0.1698	-1.91436	0.0555744	0.152716
ENSMUSG00000032096	Arcn1	protein_coding	9	Coatomer subunit delta	3657.97	-0.121782	0.0407114	-2.99134	0.00277759	0.0135204
ENSMUSG00000042350	Arel1	protein_coding	12	Apoptosis-resistant E3 ubiquitin protein ligase 1	1803.35	-0.0418039	0.0488627	-0.855606	0.392216	0.596054
ENSMUSG00000048076	Arf1	protein_coding	11	ADP-ribosylation factor 1	4611.28	-0.349485	0.0398467	-8.77048	1.779e-18	6.05153e-17
ENSMUSG00000062421	Arf2	protein_coding	11	ADP-ribosylation factor 2	3027.99	-0.142502	0.0497184	-2.8661	0.00415568	0.0188553
ENSMUSG00000051853	Arf3	protein_coding	15	ADP-ribosylation factor 3	2710.27	-0.0336168	0.0561204	-0.59899	0.54918	0.725971
ENSMUSG00000021877	Arf4	protein_coding	14	ADP-ribosylation factor 4	2188.49	-0.215081	0.0607082	-3.54286	0.000395816	0.00250429
ENSMUSG00000020440	Arf5	protein_coding	6	ADP-ribosylation factor 5	2287.67	-0.186855	0.0477373	-3.91427	9.0677e-05	0.000677477
ENSMUSG00000044147	Arf6	protein_coding	12	ADP-ribosylation factor 6	3646.99	0.228201	0.0394712	5.78122	7.41598e-09	1.08625e-07
ENSMUSG00000027575	Arfgap1	protein_coding	2	ADP-ribosylation factor GTPase-activating protein 1	1109.85	-0.124074	0.0611125	-2.03039	0.0423168	0.123594
ENSMUSG00000027255	Arfgap2	protein_coding	2	ADP-ribosylation factor GTPase-activating protein 2	1127.62	-0.0380321	0.0526664	-0.722162	0.470195	0.663893
ENSMUSG00000054277	Arfgap3	protein_coding	15	Mus musculus ADP-ribosylation factor GTPase activating protein 3 (Arfgap3), transcript variant 2, mRNA.	2389.52	-0.0286499	0.0435034	-0.658598	0.510154	0.697254
ENSMUSG00000067851	Arfgef1	protein_coding	1	Brefeldin A-inhibited guanine nucleotide-exchange protein 1	1847.33	-0.13599	0.0499792	-2.72115	0.0065056	0.0272613
ENSMUSG00000074582	Arfgef2	protein_coding	2	Brefeldin A-inhibited guanine nucleotide-exchange protein 2	1093.64	0.0827968	0.079229	1.04515	0.295955	0.497866
ENSMUSG00000074513	Arfip1	protein_coding	3	ADP-ribosylation factor interacting protein 1	302.482	-0.0751562	0.0942902	-0.797346	0.42525	0.623806
ENSMUSG00000030881	Arfip2	protein_coding	7	Arfaptin-2	849.069	0.0398795	0.0592423	0.673121	0.50087	0.689629
ENSMUSG00000038671	Arfrp1	protein_coding	2	ADP-ribosylation factor-related protein 1	550.29	-0.108277	0.0734558	-1.47412	0.140449	0.300276
ENSMUSG00000040459	Arglu1	protein_coding	8	Arginine and glutamate-rich protein 1	1973.58	0.0629818	0.0876302	0.718672	0.472343	0.665367
ENSMUSG00000027247	Arhgap1	protein_coding	2	Rho GTPase-activating protein 1	1570.06	-0.16833	0.0529934	-3.17663	0.00148997	0.00798388
ENSMUSG00000037148	Arhgap10	protein_coding	8	Rho GTPase-activating protein 10	2035.16	0.142002	0.0439668	3.23003	0.00123776	0.00680651
ENSMUSG00000041219	Arhgap11a	protein_coding	2	Rho GTPase-activating protein 11A	1365.13	0.0671747	0.0758788	0.885076	0.376116	0.580248
ENSMUSG00000041225	Arhgap12	protein_coding	18	Rho GTPase activating protein 12	1177.67	-0.0804919	0.0541731	-1.48604	0.137269	0.295488
ENSMUSG00000030766	Arhgap17	protein_coding	7	Rho GTPase-activating protein 17	210.783	0.0439994	0.119133	0.369317	0.711891	0.842073
ENSMUSG00000039031	Arhgap18	protein_coding	10	Rho GTPase-activating protein 18	1008.94	-0.260249	0.0590874	-4.40468	1.05939e-05	9.67514e-05
ENSMUSG00000025154	Arhgap19	protein_coding	19	Rho GTPase-activating protein 19	604.471	-0.229681	0.0721466	-3.18117	0.00146681	0.00787929
ENSMUSG00000053199	Arhgap20	protein_coding	9	Rho GTPase-activating protein 20	1.28312	-0.129031	0.336287	-0.49532	0.620374
ENSMUSG00000036591	Arhgap21	protein_coding	2	Rho GTPase activating protein 21	1116.68	0.0267306	0.0848657	0.314969	0.752786	0.865862
ENSMUSG00000063506	Arhgap22	protein_coding	14	Rho GTPase activating protein 22	2299.87	-0.41058	0.0444839	-9.22927	2.72477e-20	1.0312e-18
ENSMUSG00000049807	Arhgap23	protein_coding	11	Rho GTPase-activating protein 23	967.983	0.167074	0.0753125	2.21914	0.0264772	0.0856525
ENSMUSG00000057315	Arhgap24	protein_coding	5	Rho GTPase activating protein 24	348.957	-0.243186	0.11296	-2.16351	0.0305016	0.0959656
ENSMUSG00000036452	Arhgap26	protein_coding	18	Rho GTPase activating protein 26	15.6143	-0.0615516	0.320828	-0.19078	0.848698	0.922043
ENSMUSG00000034255	Arhgap27	protein_coding	11	Rho GTPase activating protein 27	5.16285	-0.169638	0.405877	-0.395988	0.692114
ENSMUSG00000024043	Arhgap28	protein_coding	17	Mus musculus Rho GTPase activating protein 28 (Arhgap28), transcript variant 2, mRNA.	1899.7	-0.0389616	0.0541452	-0.719787	0.471656	0.664868
ENSMUSG00000039831	Arhgap29	protein_coding	3	Mus musculus Rho GTPase activating protein 29 (Arhgap29), transcript variant 2, mRNA.	7729.36	-0.312191	0.0434138	-7.19118	6.42353e-13	1.46244e-11
ENSMUSG00000022799	Arhgap31	protein_coding	16	Rho GTPase activating protein 31	1380.88	0.112913	0.0836618	1.34961	0.17714	0.353717
ENSMUSG00000041444	Arhgap32	protein_coding	9	Rho GTPase-activating protein 32	229.022	0.0444397	0.121428	0.365975	0.714384	0.843614
ENSMUSG00000036882	Arhgap33	protein_coding	7	Rho GTPase-activating protein 33	15.0118	0.149192	0.313983	0.470398	0.638071	0.79181
ENSMUSG00000058230	Arhgap35	protein_coding	7	Rho GTPase activating protein 35	2682.49	0.0455515	0.0727369	0.626252	0.53115	0.712454
ENSMUSG00000033697	Arhgap39	protein_coding	15	Rho GTPase activating protein 39	284.631	-0.131797	0.101754	-1.29726	0.194543	0.376609
ENSMUSG00000031389	Arhgap4	protein_coding	X	Rho GTPase activating protein 4	3.4406	-0.135677	0.413456	-0.318224	0.750315
ENSMUSG00000050730	Arhgap42	protein_coding	9	Rho GTPase activating protein 42	1509.99	-0.268587	0.0565977	-4.74607	2.07405e-06	2.16651e-05
ENSMUSG00000033389	Arhgap44	protein_coding	11	Rho GTPase-activating protein 44	256.36	0.397417	0.0940628	4.22361	2.40421e-05	0.000204819
ENSMUSG00000035697	Arhgap45	protein_coding	10	Mus musculus Rho GTPase activating protein 45 (Arhgap45), transcript variant 3, mRNA.	21.8411	0.152461	0.299872	0.50512	0.613474	0.774748
ENSMUSG00000035133	Arhgap5	protein_coding	12	Rho GTPase activating protein 5	9368.87	-0.179572	0.0377013	-4.76307	1.90665e-06	2.00761e-05
ENSMUSG00000031355	Arhgap6	protein_coding	X	Rho GTPase activating protein 6	13.9276	-1.14632	0.347632	-3.26856	0.00108096	0.00604076
ENSMUSG00000040345	Arhgap9	protein_coding	10	Rho GTPase activating protein 9	12.9725	0.379692	0.305896	1.20343	0.228808	0.419463
ENSMUSG00000025132	Arhgdia	protein_coding	11	Rho GDP-dissociation inhibitor 1	4139.25	-0.144249	0.0640424	-2.25235	0.0243004	0.0800069
ENSMUSG00000030220	Arhgdib	protein_coding	6	Rho GDP-dissociation inhibitor 2	796.622	-0.29686	0.081093	-3.66162	0.000250621	0.00166662
ENSMUSG00000073433	Arhgdig	protein_coding	17	Rho GDP-dissociation inhibitor 3	105.367	0.320843	0.138	2.32178	0.0202447	0.0691418
ENSMUSG00000040940	Arhgef1	protein_coding	7	Rho guanine nucleotide exchange factor 1	708.274	0.208807	0.0697914	2.99173	0.00277399	0.0135074
ENSMUSG00000071176	Arhgef10	protein_coding	8	Rho guanine nucleotide exchange factor 10	1738.93	0.0976434	0.0451486	2.16279	0.0305573	0.0961198
ENSMUSG00000040964	Arhgef10l	protein_coding	4	Rho guanine nucleotide exchange factor 10-like protein	1725.99	-0.502175	0.0598433	-8.39283	4.74581e-17	1.45361e-15
ENSMUSG00000041977	Arhgef11	protein_coding	3	Rho guanine nucleotide exchange factor (GEF) 11	1255.37	0.0474655	0.0601651	0.788942	0.430146	0.627456
ENSMUSG00000059495	Arhgef12	protein_coding	9	Mus musculus Rho guanine nucleotide exchange factor (GEF) 12 (Arhgef12), transcript variant 2, mRNA.	3843.86	0.0336524	0.0712465	0.472337	0.636686	0.790907
ENSMUSG00000052921	Arhgef15	protein_coding	11	Rho guanine nucleotide exchange factor 15	10.9493	-0.0307519	0.334599	-0.0898054	0.928442	0.963152
ENSMUSG00000032875	Arhgef17	protein_coding	7	Rho guanine nucleotide exchange factor 17	2337.48	-0.088177	0.0622509	-1.4167	0.156572	0.324013
ENSMUSG00000004568	Arhgef18	protein_coding	8	Rho guanine nucleotide exchange factor 18	920.903	0.363082	0.0614429	5.90925	3.43678e-09	5.24663e-08
ENSMUSG00000028919	Arhgef19	protein_coding	4	Rho guanine nucleotide exchange factor 19	544.661	0.234564	0.0726442	3.22904	0.00124207	0.00682244
ENSMUSG00000028059	Arhgef2	protein_coding	3	Rho guanine nucleotide exchange factor 2	6937.59	-0.266065	0.057318	-4.64206	3.44946e-06	3.43923e-05
ENSMUSG00000019467	Arhgef25	protein_coding	10	Mus musculus Rho guanine nucleotide exchange factor (GEF) 25 (Arhgef25), transcript variant 3, mRNA.	1001.09	0.132852	0.0766745	1.73285	0.0831216	0.206369
ENSMUSG00000036885	Arhgef26	protein_coding	3	Rho guanine nucleotide exchange factor (GEF) 26	57.5332	-0.345876	0.212376	-1.63091	0.102909	0.242623
ENSMUSG00000021662	Arhgef28	protein_coding	13	Rho guanine nucleotide exchange factor 28	37.1549	0.788876	0.219416	3.56497	0.0003639	0.00232783
ENSMUSG00000021895	Arhgef3	protein_coding	14	Rho guanine nucleotide exchange factor 3	269.454	-0.224699	0.101536	-2.21415	0.0268186	0.0865247
ENSMUSG00000045094	Arhgef37	protein_coding	18	Rho guanine nucleotide exchange factor 37	37.453	-0.0815711	0.254539	-0.324669	0.745432	0.861538
ENSMUSG00000051517	Arhgef39	protein_coding	4	Rho guanine nucleotide exchange factor 39	166.308	0.0691378	0.122527	0.562995	0.573438	0.743515
ENSMUSG00000037509	Arhgef4	protein_coding	1	Rho guanine nucleotide exchange factor 4	21.6017	0.340847	0.290139	1.17862	0.23855	0.431899
ENSMUSG00000004562	Arhgef40	protein_coding	14	Rho guanine nucleotide exchange factor 40	3545.61	-0.0253485	0.0473649	-0.535175	0.592529	0.758607
ENSMUSG00000033542	Arhgef5	protein_coding	6	Rho guanine nucleotide exchange factor 5	1215.26	0.260125	0.0568918	4.57221	4.82612e-06	4.70157e-05
ENSMUSG00000031133	Arhgef6	protein_coding	X	Rac/Cdc42 guanine nucleotide exchange factor 6	52.9169	-0.344002	0.273979	-1.3064	0.191416	0.372724
ENSMUSG00000031511	Arhgef7	protein_coding	8	Rho guanine nucleotide exchange factor 7	990.267	-0.0359348	0.0595194	-0.603822	0.545962	0.72412
ENSMUSG00000025656	Arhgef9	protein_coding	X	Rho guanine nucleotide exchange factor 9	242.577	0.337162	0.102568	3.28559	0.00101768	0.00573369
ENSMUSG00000007880	Arid1a	protein_coding	4	AT-rich interactive domain-containing protein 1A	355.478	-0.158881	0.109689	-1.44836	0.147517	0.31061
ENSMUSG00000069729	Arid1b	protein_coding	17	AT-rich interactive domain-containing protein 1B	914.651	0.104507	0.0821235	1.27265	0.203142	0.387893
ENSMUSG00000033237	Arid2	protein_coding	15	AT-rich interactive domain-containing protein 2	1395.86	0.00207086	0.0760431	0.0272179	0.978286	0.990481
ENSMUSG00000019564	Arid3a	protein_coding	10	AT-rich interactive domain-containing protein 3A	279.837	0.268093	0.0966672	2.77451	0.00552845	0.0238923
ENSMUSG00000004661	Arid3b	protein_coding	9	AT-rich interactive domain-containing protein 3B	29.0014	0.424896	0.265726	1.60982	0.107436	0.249431
ENSMUSG00000048118	Arid4a	protein_coding	12	AT rich interactive domain 4A (RBP1-like)	821.316	0.236863	0.0667474	3.54892	0.000386808	0.0024613
ENSMUSG00000039219	Arid4b	protein_coding	13	AT-rich interactive domain-containing protein 4B	1633.83	0.296846	0.0514815	5.76619	8.10819e-09	1.17928e-07
ENSMUSG00000037447	Arid5a	protein_coding	1	AT-rich interactive domain-containing protein 5A	884.015	-0.0745609	0.0667256	-1.11751	0.263776	0.461673
ENSMUSG00000019947	Arid5b	protein_coding	10	AT-rich interactive domain-containing protein 5B	890.068	0.268378	0.0970184	2.76732	0.00565186	0.0242892
ENSMUSG00000025234	Arih1	protein_coding	9	E3 ubiquitin-protein ligase ARIH1	3041.46	0.0573724	0.0463873	1.23682	0.216152	0.403918
ENSMUSG00000064145	Arih2	protein_coding	9	Mus musculus ariadne RBR E3 ubiquitin protein ligase 2 (Arih2), transcript variant 2, mRNA.	1348.87	0.0325564	0.0588325	0.553403	0.579988	0.748851
ENSMUSG00000060904	Arl1	protein_coding	10	ADP-ribosylation factor-like protein 1	3128.64	-0.028753	0.046618	-0.616779	0.537381	0.716954
ENSMUSG00000025870	Arl10	protein_coding	13	ADP-ribosylation factor-like protein 10	251.656	-0.0880452	0.107035	-0.822625	0.410721	0.612586
ENSMUSG00000022911	Arl13b	protein_coding	16	ADP-ribosylation factor-like protein 13B	737.986	0.353317	0.0661835	5.33779	9.40886e-08	1.19845e-06
ENSMUSG00000027122	Arl14ep	protein_coding	2	ARL14 effector protein	1685.27	0.237953	0.0515121	4.61902	3.85561e-06	3.81784e-05
ENSMUSG00000073568	Arl14epl	protein_coding	18	ADP-ribosylation factor-like 14 effector protein-like	2.62259	-0.392411	0.405025	-1.19359	0.232637
ENSMUSG00000042348	Arl15	protein_coding	13	ADP-ribosylation factor-like protein 15	568.503	0.112492	0.0703086	1.60008	0.109582	0.25283
ENSMUSG00000057594	Arl16	protein_coding	11	ADP-ribosylation factor-like 16	266.636	0.0993426	0.0946089	1.04992	0.293755	0.49566
ENSMUSG00000024944	Arl2	protein_coding	19	ADP-ribosylation factor-like protein 2	600.921	0.0366693	0.0767387	0.477868	0.632744	0.788177
ENSMUSG00000031776	Arl2bp	protein_coding	8	ADP-ribosylation factor-like protein 2-binding protein	2220.08	0.0356901	0.0481999	0.740468	0.459016	0.653738
ENSMUSG00000025035	Arl3	protein_coding	19	ADP-ribosylation factor-like protein 3	877.572	0.0891448	0.0741877	1.20162	0.22951	0.42043
ENSMUSG00000047446	Arl4a	protein_coding	12	ADP-ribosylation factor-like protein 4A	292.792	0.0377017	0.10494	0.359501	0.71922	0.846501
ENSMUSG00000049866	Arl4c	protein_coding	1	ADP-ribosylation factor-like protein 4C	2039.5	-0.423257	0.0532341	-7.94964	1.87058e-15	5.11209e-14
ENSMUSG00000034936	Arl4d	protein_coding	11	ADP-ribosylation factor-like protein 4D	79.3937	0.809934	0.173544	4.66002	3.16179e-06	3.1965e-05
ENSMUSG00000036093	Arl5a	protein_coding	2	ADP-ribosylation factor-like protein 5A	2224.06	-0.194786	0.0500559	-3.89176	9.95216e-05	0.00073746
ENSMUSG00000017418	Arl5b	protein_coding	2	ADP ribosylation factor like GTPase 5B	947.858	-0.181536	0.0615686	-2.94874	0.00319076	0.015214
ENSMUSG00000038352	Arl5c	protein_coding	11	ADP-ribosylation factor-like protein 5C	68.8466	0.429121	0.164301	2.60298	0.00924171	0.0366449
ENSMUSG00000022722	Arl6	protein_coding	16	ADP-ribosylation factor-like protein 6	532.722	0.138618	0.0777198	1.78344	0.0745145	0.190463
ENSMUSG00000030654	Arl6ip1	protein_coding	7	ADP-ribosylation factor-like protein 6-interacting protein 1	2697.03	-0.0412088	0.0465256	-0.885582	0.375843	0.579951
ENSMUSG00000029404	Arl6ip4	protein_coding	5	ADP-ribosylation factor-like protein 6-interacting protein 4	914.113	0.0674858	0.0678229	0.995002	0.319735	0.523312
ENSMUSG00000035199	Arl6ip5	protein_coding	6	PRA1 family protein 3	9086.27	-0.325581	0.045992	-7.07926	1.44926e-12	3.23832e-11
ENSMUSG00000026960	Arl6ip6	protein_coding	2	ADP-ribosylation factor-like protein 6-interacting protein 6	610.959	0.0327363	0.0653841	0.50064	0.616625	0.777002
ENSMUSG00000026426	Arl8a	protein_coding	1	ADP-ribosylation factor-like protein 8A	270.68	0.0714851	0.10017	0.713829	0.475333	0.668017
ENSMUSG00000030105	Arl8b	protein_coding	6	ADP-ribosylation factor-like protein 8B	2558.79	-0.0536424	0.0449603	-1.19315	0.232809	0.42475
ENSMUSG00000027599	Armc1	protein_coding	3	Mus musculus armadillo repeat containing 1 (Armc1), transcript variant 2, mRNA.	1290.07	-0.149952	0.065894	-2.27558	0.0228712	0.0762449
ENSMUSG00000038525	Armc10	protein_coding	5	Armadillo repeat-containing protein 10	728.677	-0.0143173	0.0642644	-0.222748	0.823731	0.90821
ENSMUSG00000071324	Armc2	protein_coding	10	Armadillo repeat-containing protein 2	19.4707	0.403818	0.274925	1.45266	0.146318	0.308671
ENSMUSG00000042178	Armc5	protein_coding	7	Armadillo repeat-containing protein 5	334.305	-0.0456489	0.0849833	-0.537257	0.59109	0.757551
ENSMUSG00000002343	Armc6	protein_coding	8	Armadillo repeat-containing protein 6	606.67	-0.151878	0.0896033	-1.69528	0.0900228	0.219663
ENSMUSG00000057219	Armc7	protein_coding	11	Armadillo repeat-containing protein 7	116.791	0.180466	0.154649	1.16804	0.242792	0.436628
ENSMUSG00000032468	Armc8	protein_coding	9	Armadillo repeat-containing protein 8	1176.12	-0.0734297	0.0573536	-1.28038	0.200412	0.38452
ENSMUSG00000062590	Armc9	protein_coding	1	LisH domain-containing protein ARMC9	308.853	0.0678679	0.104986	0.646636	0.517867	0.703251
ENSMUSG00000033460	Armcx1	protein_coding	X	Armadillo repeat-containing X-linked protein 1	946.215	0.280998	0.0625373	4.49454	6.97211e-06	6.57078e-05
ENSMUSG00000033436	Armcx2	protein_coding	X	Armadillo repeat-containing X-linked protein 2	3830.55	-0.193527	0.0504536	-3.83566	0.000125225	0.000898451
ENSMUSG00000049047	Armcx3	protein_coding	X	Mus musculus armadillo repeat containing, X-linked 3 (Armcx3), transcript variant 2, mRNA.	309.996	-0.0996491	0.0942849	-1.05743	0.290315	0.492095
ENSMUSG00000049804	Armcx4	protein_coding	X	armadillo repeat containing, X-linked 4	847.659	0.0193615	0.091743	0.211049	0.832849	0.913218
ENSMUSG00000072969	Armcx5	protein_coding	X	Armadillo repeat-containing X-linked protein 5	289.087	0.0740688	0.103472	0.716003	0.473989	0.666754
ENSMUSG00000050394	Armcx6	protein_coding	X	Protein ARMCX6	203.519	-0.0196773	0.118657	-0.16621	0.867992	0.93187
ENSMUSG00000061759	Armt1	protein_coding	10	Protein-glutamate O-methyltransferase	679.297	-0.165385	0.0711074	-2.32556	0.0200421	0.0685308
ENSMUSG00000015522	Arnt	protein_coding	3	Aryl hydrocarbon receptor nuclear translocator	1196.56	0.137646	0.0639274	2.15341	0.0312861	0.0978165
ENSMUSG00000015709	Arnt2	protein_coding	7	Aryl hydrocarbon receptor nuclear translocator 2	54.5004	0.0252192	0.187589	0.134221	0.893228	0.944928
ENSMUSG00000055116	Arntl	protein_coding	7	Mus musculus aryl hydrocarbon receptor nuclear translocator-like (Arntl), transcript variant 3, mRNA.	520.123	0.000631963	0.0754414	0.00834935	0.993338	0.996817
ENSMUSG00000040187	Arntl2	protein_coding	6	Aryl hydrocarbon receptor nuclear translocator-like protein 2	129.136	0.631195	0.124348	5.06457	4.09323e-07	4.73406e-06
ENSMUSG00000029621	Arpc1a	protein_coding	5	Actin-related protein 2/3 complex subunit 1A	1136.34	-0.0096498	0.0529328	-0.1823	0.855347	0.926048
ENSMUSG00000029622	Arpc1b	protein_coding	5	Actin-related protein 2/3 complex subunit 1B	5488.04	-0.0553595	0.0414389	-1.33589	0.181586	0.360406
ENSMUSG00000006304	Arpc2	protein_coding	1	Mus musculus actin related protein 2/3 complex, subunit 2 (Arpc2), transcript variant 2, mRNA.	5696.15	-0.0926172	0.0381906	-2.42513	0.0153031	0.0550476
ENSMUSG00000029465	Arpc3	protein_coding	5	Actin-related protein 2/3 complex subunit 3	3089.45	-0.00567349	0.0509357	-0.111381	0.911314	0.95394
ENSMUSG00000079426	Arpc4	protein_coding	6	Actin-related protein 2/3 complex subunit 4	1825.44	-0.322717	0.0466543	-6.91687	4.61733e-12	9.80217e-11
ENSMUSG00000008475	Arpc5	protein_coding	1	Actin-related protein 2/3 complex subunit 5	3463.22	0.0058114	0.0508932	0.114193	0.909085	0.953011
ENSMUSG00000026755	Arpc5l	protein_coding	2	Actin-related protein 2/3 complex subunit 5-like protein	1230.1	-0.0221712	0.0535446	-0.414057	0.678832	0.82001
ENSMUSG00000039043	Arpin	protein_coding	7	Arpin	1035.85	0.151274	0.0594653	2.5435	0.0109747	0.0420516
ENSMUSG00000007656	Arpp19	protein_coding	9	Mus musculus cAMP-regulated phosphoprotein 19 (Arpp19), transcript variant 6, mRNA.	2058.11	-0.109612	0.0477779	-2.29417	0.0217808	0.0732974
ENSMUSG00000032503	Arpp21	protein_coding	9	cAMP-regulated phosphoprotein 21	331.987	-2.62038	0.198407	-12.6593	9.93273e-37	7.32641e-35
ENSMUSG00000018909	Arrb1	protein_coding	7	Beta-arrestin-1	286.964	0.319958	0.0889722	3.5947	0.00032476	0.00209882
ENSMUSG00000060216	Arrb2	protein_coding	11	Beta-arrestin-2	383.267	0.215489	0.0763144	2.8227	0.00476217	0.0211186
ENSMUSG00000026972	Arrdc1	protein_coding	2	Arrestin domain-containing protein 1	192.388	0.498869	0.109763	4.54181	5.57744e-06	5.38631e-05
ENSMUSG00000002910	Arrdc2	protein_coding	8	Arrestin domain-containing protein 2	129.665	0.153712	0.137972	1.11491	0.264887	0.462526
ENSMUSG00000074794	Arrdc3	protein_coding	13	Arrestin domain-containing protein 3	1214.26	0.26099	0.0608674	4.28831	1.80037e-05	0.00015689
ENSMUSG00000042659	Arrdc4	protein_coding	7	Arrestin domain-containing protein 4	46.2338	-0.416762	0.249793	-1.70408	0.0883658	0.21638
ENSMUSG00000022620	Arsa	protein_coding	15	Arylsulfatase A	568.745	0.212009	0.0768284	2.75927	0.0057931	0.0247637
ENSMUSG00000042082	Arsb	protein_coding	13	arylsulfatase B	99.2551	0.0609976	0.157396	0.387564	0.698339	0.833337
ENSMUSG00000020604	Arsg	protein_coding	11	Arylsulfatase G	58.6559	0.271016	0.220164	1.24516	0.213073	0.400052
ENSMUSG00000036412	Arsi	protein_coding	18	Arylsulfatase I	2.27559	-0.171745	0.393949	-0.489105	0.624767
ENSMUSG00000046561	Arsj	protein_coding	3	Arylsulfatase J	618.552	0.264362	0.0729742	3.62248	0.00029179	0.00191572
ENSMUSG00000021592	Arsk	protein_coding	13	arylsulfatase family member K	265.506	-0.0186856	0.10891	-0.172041	0.863405	0.930054
ENSMUSG00000030996	Art1	protein_coding	7	ADP-ribosyltransferase 1	176.546	-2.02863	0.300738	-6.10922	1.00122e-09	1.63186e-08
ENSMUSG00000034842	Art3	protein_coding	5	ADP-ribosyltransferase 3	133.294	-1.63771	0.130523	-12.465	1.15848e-35	8.13017e-34
ENSMUSG00000070424	Art5	protein_coding	7	ADP-ribosyltransferase 5	24.4346	-0.583056	0.396451	-1.91459	0.0555453	0.152694
ENSMUSG00000028539	Artn	protein_coding	4	Artemin	38.3291	0.391754	0.207217	1.87964	0.0601576	0.162348
ENSMUSG00000031982	Arv1	protein_coding	8	Protein ARV1	61.313	0.191127	0.186213	1.02457	0.305567	0.507826
ENSMUSG00000000325	Arvcf	protein_coding	16	Armadillo repeat protein deleted in velo-cardio-facial syndrome homolog	1245.6	0.502793	0.0525741	9.56252	1.14918e-21	4.60214e-20
ENSMUSG00000035277	Arx	protein_coding	X	Homeobox protein ARX	9.15128	-0.300245	0.414122	-1.31857	0.187311	0.36753
ENSMUSG00000048040	Arxes2	protein_coding	X	Adipocyte-related X-chromosome expressed sequence 1	19.8329	-0.591281	0.290601	-2.02729	0.0426327	0.124312
ENSMUSG00000003559	As3mt	protein_coding	19	Arsenite methyltransferase	119.888	-0.0979167	0.131786	-0.741925	0.458133	0.653038
ENSMUSG00000031591	Asah1	protein_coding	8	Acid ceramidase Acid ceramidase subunit alpha Acid ceramidase subunit beta	4115.32	-0.0861111	0.0385432	-2.23425	0.0254665	0.0830105
ENSMUSG00000024887	Asah2	protein_coding	19	Neutral ceramidase Neutral ceramidase soluble form	510.725	-0.275451	0.0757522	-3.63626	0.00027662	0.00182191
ENSMUSG00000022377	Asap1	protein_coding	15	Arf-GAP with SH3 domain, ANK repeat and PH domain-containing protein 1	1086.48	0.0796799	0.0839021	0.949814	0.342207	0.547206
ENSMUSG00000052632	Asap2	protein_coding	12	Arf-GAP with SH3 domain, ANK repeat and PH domain-containing protein 2	108.045	0.349938	0.161585	2.166	0.0303113	0.0955331
ENSMUSG00000036995	Asap3	protein_coding	4	Arf-GAP with SH3 domain, ANK repeat and PH domain-containing protein 3	430.797	-0.0231186	0.0882435	-0.26204	0.79329	0.891457
ENSMUSG00000026311	Asb1	protein_coding	1	Ankyrin repeat and SOCS box protein 1	616.442	0.00413059	0.0702976	0.0587379	0.953161	0.976767
ENSMUSG00000033781	Asb13	protein_coding	13	Ankyrin repeat and SOCS box protein 13	72.1454	0.350844	0.177771	1.97519	0.0482466	0.137034
ENSMUSG00000021898	Asb14	protein_coding	14	ankyrin repeat and SOCS box containing 14	5.20849	0.000682167	0.406497	0.00517978	0.995867
ENSMUSG00000029685	Asb15	protein_coding	6	Ankyrin repeat and SOCS box protein 15	2.30278	0.3646	0.391014	1.11372	0.265398
ENSMUSG00000034768	Asb16	protein_coding	11	Ankyrin repeat and SOCS box protein 16	18.1719	-0.368051	0.39469	-1.20965	0.226412	0.416323
ENSMUSG00000021200	Asb2	protein_coding	12	Ankyrin repeat and SOCS box protein 2	130.296	-2.479	0.276365	-7.76762	7.99758e-15	2.1176e-13
ENSMUSG00000020305	Asb3	protein_coding	11	Ankyrin repeat and SOCS box protein 3	631.984	-0.069622	0.070496	-0.987692	0.323303	0.526944
ENSMUSG00000031519	Asb5	protein_coding	8	Ankyrin repeat and SOCS box protein 5	3174.88	-0.216009	0.0471559	-4.58105	4.62648e-06	4.51316e-05
ENSMUSG00000039483	Asb6	protein_coding	2	Ankyrin repeat and SOCS box protein 6	677.456	0.22063	0.0688099	3.20607	0.00134562	0.00730787
ENSMUSG00000030509	Asb7	protein_coding	7	Ankyrin repeat and SOCS box protein 7	569.381	0.086606	0.0723866	1.19656	0.231479	0.423124
ENSMUSG00000048175	Asb8	protein_coding	15	ankyrin repeat and SOCS box containing 8	656.496	-0.0796619	0.0724939	-1.09923	0.271667	0.47064
ENSMUSG00000044475	Ascc1	protein_coding	10	Activating signal cointegrator 1 complex subunit 1	403.84	-0.228675	0.0800427	-2.8573	0.00427263	0.0192849
ENSMUSG00000020412	Ascc2	protein_coding	11	Activating signal cointegrator 1 complex subunit 2	936.528	0.315869	0.0637668	4.95369	7.28203e-07	8.11691e-06
ENSMUSG00000038774	Ascc3	protein_coding	10	Activating signal cointegrator 1 complex subunit 3	2766.83	0.0409352	0.0567151	0.721769	0.470436	0.66404
ENSMUSG00000019857	Asf1a	protein_coding	10	Histone chaperone ASF1A	802.666	-0.0523944	0.0610055	-0.858731	0.390489	0.594539
ENSMUSG00000005470	Asf1b	protein_coding	8	Histone chaperone ASF1B	872.321	0.00921473	0.0647899	0.142308	0.886837	0.941613
ENSMUSG00000020884	Asgr1	protein_coding	11	Asialoglycoprotein receptor 1	14.5631	-0.51381	0.298639	-1.66038	0.0968372	0.232322
ENSMUSG00000040963	Asgr2	protein_coding	11	Asialoglycoprotein receptor 2	5.96432	-1.36788	0.399269	-3.14357	0.00166899	0.00878106
ENSMUSG00000028053	Ash1l	protein_coding	3	Histone-lysine N-methyltransferase ASH1L	1476.55	-0.131135	0.0881531	-1.4878	0.136805	0.294871
ENSMUSG00000031575	Ash2l	protein_coding	8	Mus musculus ASH2 like histone lysine methyltransferase complex subunit (Ash2l), transcript variant 4, mRNA.	2489.46	0.0219722	0.0456339	0.481487	0.63017	0.786733
ENSMUSG00000023017	Asic1	protein_coding	15	Acid-sensing ion channel 1	15.4778	0.030794	0.325867	0.0941046	0.925026	0.961471
ENSMUSG00000025533	Asl	protein_coding	5	Argininosuccinate lyase	748.944	-0.0953926	0.0657486	-1.45074	0.146851	0.309535
ENSMUSG00000052456	Asna1	protein_coding	8	ATPase Asna1	2593.69	0.0350115	0.0588685	0.594765	0.552001	0.727331
ENSMUSG00000029752	Asns	protein_coding	6	Asparagine synthetase	2538.92	0.397067	0.0701831	5.65676	1.54256e-08	2.16302e-07
ENSMUSG00000026095	Asnsd1	protein_coding	1	Asparagine synthetase domain-containing protein 1	229.243	0.00552398	0.105463	0.0523833	0.958223	0.979221
ENSMUSG00000020774	Aspa	protein_coding	11	aspartoacylase	88.2606	-1.15971	0.203848	-5.69255	1.25159e-08	1.77221e-07
ENSMUSG00000028207	Asph	protein_coding	4	Aspartyl/asparaginyl beta-hydroxylase	3590.75	-0.240449	0.0455179	-5.28249	1.27443e-07	1.59105e-06
ENSMUSG00000029348	Asphd2	protein_coding	5	Mus musculus aspartate beta-hydroxylase domain containing 2 (Asphd2), transcript variant 6, mRNA.	24.9332	0.472517	0.273882	1.72595	0.084356	0.208539
ENSMUSG00000033952	Aspm	protein_coding	1	Abnormal spindle-like microcephaly-associated protein homolog	2515.12	-0.0904268	0.118559	-0.762368	0.44584	0.64185
ENSMUSG00000021388	Aspn	protein_coding	13	Asporin	136.482	-1.58192	0.211064	-7.45554	8.95002e-14	2.22703e-12
ENSMUSG00000033508	Asprv1	protein_coding	6	Retroviral-like aspartic protease 1	1.34051	0.132532	0.354075	0.52323	0.600814
ENSMUSG00000025142	Aspscr1	protein_coding	11	Tether containing UBX domain for GLUT4	770.865	0.0235686	0.0616003	0.382605	0.702013	0.835515
ENSMUSG00000024654	Asrgl1	protein_coding	19	Isoaspartyl peptidase/L-asparaginase Isoaspartyl peptidase/L-asparaginase alpha chain Isoaspartyl peptidase/L-asparaginase beta chain	124.76	0.331938	0.133915	2.47826	0.0132025	0.0487781
ENSMUSG00000076441	Ass1	protein_coding	2	Argininosuccinate synthase	172.75	0.892759	0.12079	7.37895	1.59548e-13	3.87662e-12
ENSMUSG00000032567	Aste1	protein_coding	9	1	185.483	-0.127233	0.109667	-1.15928	0.246343	0.44082
ENSMUSG00000042548	Asxl1	protein_coding	2	Putative Polycomb group protein ASXL1	1447.23	-0.087812	0.0554551	-1.58351	0.113304	0.258652
ENSMUSG00000037486	Asxl2	protein_coding	12	putative Polycomb group protein ASXL2 isoform 1	1174.81	-0.184813	0.074311	-2.48726	0.012873	0.0478049
ENSMUSG00000013662	Atad1	protein_coding	19	ATPase family AAA domain-containing protein 1	2507.17	-0.0767644	0.0521632	-1.47162	0.141124	0.301186
ENSMUSG00000022360	Atad2	protein_coding	15	ATPase family AAA domain-containing protein 2	3907.04	-0.0246773	0.0516251	-0.477914	0.632712	0.788177
ENSMUSG00000052812	Atad2b	protein_coding	12	ATPase family, AAA domain containing 2B	1213.78	-0.21023	0.0556579	-3.77745	0.000158445	0.00110927
ENSMUSG00000029036	Atad3a	protein_coding	4	ATPase family AAA domain-containing protein 3	1102	-0.001734	0.0532555	-0.0325437	0.974038	0.988326
ENSMUSG00000054514	Atad3aos	antisense	4	ATPase family, AAA domain containing 3A, opposite strand	8.45352	0.503693	0.376352	1.33698	0.18123	0.359895
ENSMUSG00000017550	Atad5	protein_coding	11	ATPase family AAA domain-containing protein 5	404.628	0.032875	0.0863082	0.380811	0.703343	0.836548
ENSMUSG00000024426	Atat1	protein_coding	17	Mus musculus alpha tubulin acetyltransferase 1 (Atat1), transcript variant 5, mRNA.	213.968	0.0159675	0.117688	0.135633	0.892111	0.944369
ENSMUSG00000034958	Atcay	protein_coding	10	Caytaxin	3.15376	0.587857	0.412995	1.47989	0.138904
ENSMUSG00000085779	Atcayos	antisense	10	ataxia, cerebellar, Cayman type, opposite strand	28.6539	-1.10469	0.367744	-3.20867	0.00133351	0.00725303
ENSMUSG00000030850	Ate1	protein_coding	7	Arginyl-tRNA--protein transferase 1	1532.83	-0.161233	0.0536485	-3.00547	0.00265174	0.0129733
ENSMUSG00000023027	Atf1	protein_coding	15	Cyclic AMP-dependent transcription factor ATF-1	399.984	0.0883615	0.0843268	1.04774	0.294758	0.496831
ENSMUSG00000027104	Atf2	protein_coding	2	Cyclic AMP-dependent transcription factor ATF-2	1394.98	0.00233012	0.0585117	0.0398311	0.968228	0.985543
ENSMUSG00000026628	Atf3	protein_coding	1	Cyclic AMP-dependent transcription factor ATF-3	395.314	0.458697	0.0797218	5.74964	8.94352e-09	1.29296e-07
ENSMUSG00000042406	Atf4	protein_coding	15	Cyclic AMP-dependent transcription factor ATF-4	6632.29	0.0580253	0.0422866	1.37218	0.170007	0.343651
ENSMUSG00000038539	Atf5	protein_coding	7	Cyclic AMP-dependent transcription factor ATF-5	615.291	0.733617	0.0731614	10.0248	1.18566e-23	5.10151e-22
ENSMUSG00000026663	Atf6	protein_coding	1	Cyclic AMP-dependent transcription factor ATF-6 alpha Processed cyclic AMP-dependent transcription factor ATF-6 alpha	3228.58	-0.345837	0.0534325	-6.47298	9.60908e-11	1.74673e-09
ENSMUSG00000015461	Atf6b	protein_coding	17	activating transcription factor 6 beta	431.04	0.0141796	0.0814186	0.174133	0.861761	0.929252
ENSMUSG00000099083	Atf7	protein_coding	15	Cyclic AMP-dependent transcription factor ATF-7	147.799	-0.170178	0.134378	-1.26717	0.205096	0.390329
ENSMUSG00000030213	Atf7ip	protein_coding	6	Activating transcription factor 7-interacting protein 1	452.808	0.327567	0.0890855	3.67602	0.000236904	0.00158488
ENSMUSG00000039200	Atf7ip2	protein_coding	16	Activating transcription factor 7-interacting protein 2	1.53275	0.524807	0.373116	0.969404	0.332344
ENSMUSG00000021619	Atg10	protein_coding	13	autophagy related 10	233.925	-0.00864347	0.101832	-0.0849866	0.932272	0.96484
ENSMUSG00000037204	Atg101	protein_coding	15	Autophagy-related protein 101	647.176	0.0286597	0.0659702	0.434439	0.66397	0.809153
ENSMUSG00000032905	Atg12	protein_coding	18	Ubiquitin-like protein ATG12	1052.01	-0.095358	0.0599464	-1.5912	0.111565	0.255859
ENSMUSG00000027244	Atg13	protein_coding	2	Mus musculus autophagy related 13 (Atg13), transcript variant 4, mRNA.	356.96	0.0182643	0.0914232	0.199773	0.841658	0.918051
ENSMUSG00000037526	Atg14	protein_coding	14	Beclin 1-associated autophagy-related key regulator	285.002	-0.0269321	0.0991849	-0.271864	0.785727	0.887204
ENSMUSG00000026289	Atg16l1	protein_coding	1	autophagy related 16-like 1 (S. cerevisiae)	1000.23	0.0547887	0.0634452	0.863572	0.387823	0.591742
ENSMUSG00000047767	Atg16l2	protein_coding	7	autophagy related 16-like 2 (S. cerevisiae)	363.019	0.0642148	0.102418	0.626904	0.530722	0.712161
ENSMUSG00000024773	Atg2a	protein_coding	19	Autophagy-related A	560.865	0.0967307	0.0884227	1.09422	0.273857	0.473695
ENSMUSG00000041341	Atg2b	protein_coding	12	Autophagy-related B	1498.5	-0.11529	0.0712508	-1.61834	0.105589	0.246568
ENSMUSG00000022663	Atg3	protein_coding	16	Ubiquitin-like-conjugating enzyme ATG3	1195.4	0.101925	0.0633106	1.60995	0.107409	0.249431
ENSMUSG00000079418	Atg4a	protein_coding	X	Cysteine protease ATG4A	197.396	0.109305	0.120335	0.908907	0.363399	0.568701
ENSMUSG00000087119	Atg4a-ps	protein_coding	3	autophagy related 4A, pseudogene	2.80375	0.399719	0.413039	0.960161	0.336974
ENSMUSG00000026280	Atg4b	protein_coding	1	autophagy related 4B cysteine peptidase	1338.35	0.0927672	0.0512335	1.81066	0.070194	0.182222
ENSMUSG00000028550	Atg4c	protein_coding	4	Cysteine protease ATG4C	248.109	-0.0115661	0.106243	-0.108839	0.913331	0.955083
ENSMUSG00000002820	Atg4d	protein_coding	9	Cysteine protease ATG4D Cysteine protease ATG4D, mitochondrial	481.962	-0.13913	0.0747905	-1.86011	0.0628696	0.167757
ENSMUSG00000038160	Atg5	protein_coding	10	Autophagy protein 5	1185.84	0.0222568	0.0559102	0.398075	0.690575	0.828133
ENSMUSG00000030314	Atg7	protein_coding	6	Ubiquitin-like modifier-activating enzyme ATG7	484.697	0.14055	0.092182	1.52465	0.127346	0.280988
ENSMUSG00000033124	Atg9a	protein_coding	1	autophagy-related protein 9A isoform b	401.847	-0.00699139	0.0886759	-0.0789195	0.937097	0.967444
ENSMUSG00000038295	Atg9b	protein_coding	5	Autophagy-related protein 9B	50.0512	-0.395475	0.192081	-2.04425	0.0409293	0.120243
ENSMUSG00000026192	Atic	protein_coding	1	Bifunctional purine biosynthesis protein PURH Phosphoribosylaminoimidazolecarboxamide formyltransferase IMP cyclohydrolase	2634.2	0.125136	0.045175	2.76992	0.005607	0.0241422
ENSMUSG00000021066	Atl1	protein_coding	12	Atlastin-1	53.9073	0.392896	0.206507	1.90981	0.0561573	0.154025
ENSMUSG00000059811	Atl2	protein_coding	17	Mus musculus atlastin GTPase 2 (Atl2), transcript variant 5, mRNA.	1426.97	0.0140879	0.0487659	0.288891	0.772665	0.878108
ENSMUSG00000024759	Atl3	protein_coding	19	Atlastin-3	2866.99	-0.038129	0.050926	-0.748708	0.454033	0.649254
ENSMUSG00000034218	Atm	protein_coding	9	Serine-protein kinase ATM	917.98	-0.0394349	0.0949074	-0.415497	0.677778	0.819353
ENSMUSG00000047388	Atmin	protein_coding	8	ATM interactor	410.176	0.0425131	0.0835958	0.508594	0.611037	0.773128
ENSMUSG00000004263	Atn1	protein_coding	6	Atrophin-1	4.34981	0.242361	0.412427	0.589954	0.555222
ENSMUSG00000037621	Atoh8	protein_coding	6	8	161.081	0.0607038	0.131245	0.463335	0.643125	0.794943
ENSMUSG00000018585	Atox1	protein_coding	11	Copper transport protein ATOX1	1045.28	-0.253049	0.0642263	-3.93968	8.1589e-05	0.000619874
ENSMUSG00000025324	Atp10a	protein_coding	7	Probable phospholipid-transporting ATPase VA	518.562	0.38142	0.0776665	4.90946	9.13255e-07	1.00326e-05
ENSMUSG00000046808	Atp10d	polymorphic_pseudogene	5	Mus musculus ATPase, class V, type 10D (Atp10d), transcript variant 1, coding, mRNA.	332.076	0.275544	0.0899076	3.06268	0.00219368	0.0110656
ENSMUSG00000031441	Atp11a	protein_coding	8	Probable phospholipid-transporting ATPase IH	3408.5	0.262436	0.0452128	5.80458	6.45276e-09	9.5386e-08
ENSMUSG00000037400	Atp11b	protein_coding	3	ATPase, class VI, type 11B	1175.98	-0.00738198	0.0595861	-0.123887	0.901405	0.949376
ENSMUSG00000062949	Atp11c	protein_coding	X	Phospholipid-transporting ATPase 11C	949.941	-0.109496	0.061641	-1.77601	0.0757314	0.192755
ENSMUSG00000031862	Atp13a1	protein_coding	8	Manganese-transporting ATPase 13A1	1249.36	-0.108839	0.0549702	-1.97993	0.0477118	0.135755
ENSMUSG00000036622	Atp13a2	protein_coding	4	Cation-transporting ATPase 13A2	767.095	0.142087	0.0709133	2.00365	0.0451076	0.129894
ENSMUSG00000022533	Atp13a3	protein_coding	16	Probable cation-transporting ATPase 13A3	7315.94	-0.319426	0.0527202	-6.05908	1.369e-09	2.20395e-08
ENSMUSG00000048939	Atp13a5	protein_coding	16	Probable cation-transporting ATPase 13A5	1.84601	0.00132991	0.33986	0.00478035	0.996186
ENSMUSG00000033161	Atp1a1	protein_coding	3	Sodium/potassium-transporting ATPase subunit alpha-1	8601.63	-0.459374	0.0390933	-11.751	6.98177e-32	4.3695e-30
ENSMUSG00000007097	Atp1a2	protein_coding	1	Sodium/potassium-transporting ATPase subunit alpha-2	575.322	-1.55626	0.177591	-8.79544	1.42486e-18	4.89293e-17
ENSMUSG00000040907	Atp1a3	protein_coding	7	Sodium/potassium-transporting ATPase subunit alpha-3	27.5157	-0.296624	0.264617	-1.12075	0.262395	0.460163
ENSMUSG00000026576	Atp1b1	protein_coding	1	Sodium/potassium-transporting ATPase subunit beta-1	433.66	0.527505	0.0995318	5.30622	1.11922e-07	1.41068e-06
ENSMUSG00000041329	Atp1b2	protein_coding	11	Sodium/potassium-transporting ATPase subunit beta-2	2.1879	0.00535185	0.394568	0.0107294	0.991439
ENSMUSG00000032412	Atp1b3	protein_coding	9	Sodium/potassium-transporting ATPase subunit beta-3	2350.08	-0.0756029	0.0566646	-1.33431	0.182102	0.360884
ENSMUSG00000025436	Atp23	protein_coding	10	Mitochondrial inner membrane protease ATP23 homolog	171.781	-0.0815651	0.111787	-0.729	0.466001	0.66009
ENSMUSG00000030730	Atp2a1	protein_coding	7	Sarcoplasmic/endoplasmic reticulum calcium ATPase 1	1992.56	-2.56515	0.162303	-15.7767	4.50103e-56	5.86229e-54
ENSMUSG00000029467	Atp2a2	protein_coding	5	Sarcoplasmic/endoplasmic reticulum calcium ATPase 2	8144.13	-0.202898	0.0441238	-4.59865	4.25237e-06	4.17945e-05
ENSMUSG00000020788	Atp2a3	protein_coding	11	Sarcoplasmic/endoplasmic reticulum calcium ATPase 3	19.7213	0.419358	0.296479	1.3962	0.162653	0.332454
ENSMUSG00000019943	Atp2b1	protein_coding	10	Plasma membrane calcium-transporting ATPase 1	7242.47	-0.629417	0.0580467	-10.843	2.15204e-27	1.12605e-25
ENSMUSG00000031376	Atp2b3	protein_coding	X	ATPase, Ca++ transporting, plasma membrane 3	3.5019	0.246367	0.399345	1.13174	0.257742
ENSMUSG00000026463	Atp2b4	protein_coding	1	Plasma membrane calcium-transporting ATPase 4	741.177	-0.0926662	0.0999934	-0.926378	0.354249	0.559286
ENSMUSG00000032570	Atp2c1	protein_coding	9	Calcium-transporting ATPase type 2C member 1	3030.97	0.110481	0.0387479	2.85125	0.00435477	0.0196006
ENSMUSG00000034112	Atp2c2	protein_coding	8	Calcium-transporting ATPase type 2C member 2	1.82335	0.382949	0.389636	0.879081	0.379358
ENSMUSG00000025428	Atp5a1	protein_coding	18	ATP synthase subunit alpha, mitochondrial	20256.2	-0.261861	0.0354216	-7.39269	1.43885e-13	3.51377e-12
ENSMUSG00000025393	Atp5b	protein_coding	10	ATP synthase subunit beta, mitochondrial	44567.7	-0.303958	0.0404192	-7.52011	5.4732e-14	1.39799e-12
ENSMUSG00000025781	Atp5c1	protein_coding	2	ATP synthase subunit gamma, mitochondrial	6303.21	-0.192508	0.0426321	-4.51555	6.31536e-06	6.01061e-05
ENSMUSG00000003072	Atp5d	protein_coding	10	ATP synthase subunit delta, mitochondrial	3185.34	-0.188077	0.0448391	-4.19449	2.73483e-05	0.00023027
ENSMUSG00000016252	Atp5e	protein_coding	2	ATP synthase subunit epsilon, mitochondrial	1247.27	-0.400473	0.0748007	-5.35425	8.59123e-08	1.10207e-06
ENSMUSG00000000563	Atp5f1	protein_coding	3	ATP synthase F(0) complex subunit B1, mitochondrial	4640.94	-0.375841	0.0460338	-8.16433	3.23228e-16	9.42119e-15
ENSMUSG00000006057	Atp5g1	protein_coding	11	ATP synthase F(0) complex subunit C1, mitochondrial	24.4964	-0.0456767	0.277369	-0.164552	0.869297	0.932467
ENSMUSG00000062683	Atp5g2	protein_coding	15	ATP synthase F(0) complex subunit C2, mitochondrial	29.0576	0.116965	0.246197	0.472461	0.636598	0.790868
ENSMUSG00000018770	Atp5g3	protein_coding	2	ATP synthase F(0) complex subunit C3, mitochondrial	4419.44	-0.380727	0.0418551	-9.09612	9.36178e-20	3.43511e-18
ENSMUSG00000034566	Atp5h	protein_coding	11	ATP synthase subunit d, mitochondrial	983.149	-0.145828	0.0597032	-2.44259	0.0145824	0.0529326
ENSMUSG00000022890	Atp5j	protein_coding	16	ATP synthase-coupling factor 6, mitochondrial	1541.85	-0.150691	0.0556412	-2.70829	0.0067631	0.0281445
ENSMUSG00000038690	Atp5j2	protein_coding	5	ATP synthase subunit f, mitochondrial	761.551	-0.177645	0.0590614	-3.00761	0.00263308	0.0129039
ENSMUSG00000050856	Atp5k	protein_coding	5	ATP synthase subunit e, mitochondrial	1377.72	-0.138401	0.0572814	-2.41619	0.0156837	0.0561933
ENSMUSG00000038717	Atp5l	protein_coding	9	ATP synthase subunit g, mitochondrial	45.4439	-0.175134	0.21072	-0.829334	0.406916	0.60892
ENSMUSG00000022956	Atp5o	protein_coding	16	ATP synthase subunit O, mitochondrial	3577.79	-0.307033	0.0446401	-6.87792	6.07311e-12	1.27801e-10
ENSMUSG00000054894	Atp5s	protein_coding	12	ATP synthase subunit s, mitochondrial	136.703	0.171723	0.134111	1.28203	0.199831	0.383677
ENSMUSG00000019087	Atp6ap1	protein_coding	X	ATPase, H+ transporting, lysosomal accessory protein 1	4158.98	-0.0155713	0.0395937	-0.393301	0.694097	0.830684
ENSMUSG00000031007	Atp6ap2	protein_coding	X	Renin receptor	3050.08	-0.160306	0.04173	-3.84169	0.000122188	0.000880597
ENSMUSG00000019302	Atp6v0a1	protein_coding	11	ATPase, H+ transporting, lysosomal V0 subunit A1	692.802	0.508276	0.0658827	7.71633	1.19729e-14	3.15861e-13
ENSMUSG00000038023	Atp6v0a2	protein_coding	5	V-type proton ATPase 116 kDa subunit a isoform 2	2122.3	-0.396846	0.042853	-9.26092	2.02681e-20	7.71096e-19
ENSMUSG00000033379	Atp6v0b	protein_coding	4	ATPase, H+ transporting, lysosomal V0 subunit B	2656.01	0.0130976	0.0489415	0.267617	0.788994	0.889048
ENSMUSG00000024121	Atp6v0c	protein_coding	17	ATPase, H+ transporting, lysosomal V0 subunit C	6.54917	-0.684593	0.392974	-1.70958	0.0873441	0.21435
ENSMUSG00000013160	Atp6v0d1	protein_coding	8	V-type proton ATPase subunit d 1	1939.21	0.0975959	0.0482583	2.02246	0.0431287	0.12543
ENSMUSG00000028238	Atp6v0d2	protein_coding	4	V-type proton ATPase subunit d 2	7.5095	0.395496	0.408085	1.17382	0.240468	0.434121
ENSMUSG00000015575	Atp6v0e	protein_coding	17	V-type proton ATPase subunit e 1	1676.83	-0.096605	0.0586668	-1.64674	0.0996119	0.237286
ENSMUSG00000039347	Atp6v0e2	protein_coding	6	Mus musculus ATPase, H+ transporting, lysosomal V0 subunit E2 (Atp6v0e2), transcript variant 2, mRNA.	57.0575	-0.0394961	0.210548	-0.189876	0.849406	0.922421
ENSMUSG00000052459	Atp6v1a	protein_coding	16	Mus musculus ATPase, H+ transporting, lysosomal V1 subunit A (Atp6v1a), transcript variant 2, mRNA.	5825.94	-0.300939	0.0337648	-8.9132	4.95807e-19	1.73978e-17
ENSMUSG00000006273	Atp6v1b2	protein_coding	8	V-type proton ATPase subunit B, brain isoform	2199.55	0.0925389	0.0505463	1.83078	0.0671338	0.176657
ENSMUSG00000022295	Atp6v1c1	protein_coding	15	ATPase, H+ transporting, lysosomal V1 subunit C1	2100.99	0.103959	0.046483	2.23651	0.0253183	0.0826355
ENSMUSG00000020566	Atp6v1c2	protein_coding	12	ATPase, H+ transporting, lysosomal V1 subunit C2	61.7933	-0.20293	0.388266	-0.729909	0.465446	0.659507
ENSMUSG00000021114	Atp6v1d	protein_coding	12	ATPase, H+ transporting, lysosomal V1 subunit D	2145.62	-0.00915726	0.0522975	-0.175137	0.860972	0.928958
ENSMUSG00000019210	Atp6v1e1	protein_coding	6	ATPase, H+ transporting, lysosomal V1 subunit E1	3025.72	-0.181274	0.0537056	-3.37567	0.000736356	0.00430818
ENSMUSG00000004285	Atp6v1f	protein_coding	6	ATPase, H+ transporting, lysosomal V1 subunit F	593.637	-0.0844731	0.0820418	-1.03001	0.303005	0.505664
ENSMUSG00000039105	Atp6v1g1	protein_coding	4	ATPase, H+ transporting, lysosomal V1 subunit G1	2176.44	-0.216932	0.0543101	-3.99451	6.48293e-05	0.000505522
ENSMUSG00000024403	Atp6v1g2	protein_coding	17	ATPase, H+ transporting, lysosomal V1 subunit G2	14.7504	1.05588	0.333617	3.13575	0.00171414	0.00897876
ENSMUSG00000033793	Atp6v1h	protein_coding	1	V-type proton ATPase subunit H	1977.22	0.00276623	0.0468232	0.059064	0.952901	0.976681
ENSMUSG00000033792	Atp7a	protein_coding	X	Copper-transporting ATPase 1	726.065	-0.539472	0.0842667	-6.40266	1.52689e-10	2.7185e-09
ENSMUSG00000037685	Atp8a1	protein_coding	5	Phospholipid-transporting ATPase IA	6.91807	-0.629866	0.397264	-1.62327	0.104532	0.245009
ENSMUSG00000039529	Atp8b1	protein_coding	18	Phospholipid-transporting ATPase IC	31.1546	-0.440314	0.252625	-1.75246	0.0796948	0.20013
ENSMUSG00000060671	Atp8b2	protein_coding	3	Phospholipid-transporting ATPase ID	3144.59	0.128063	0.043297	2.95774	0.00309899	0.0148253
ENSMUSG00000003341	Atp8b3	protein_coding	10	Phospholipid-transporting ATPase IK	2.35442	-0.201739	0.411627	-0.420497	0.674123
ENSMUSG00000028457	Atp8b5	protein_coding	4	Phospholipid-transporting ATPase FetA	8.03343	0.829748	0.379034	2.15444	0.031206	0.0976083
ENSMUSG00000027546	Atp9a	protein_coding	2	Mus musculus ATPase, class II, type 9A (Atp9a), transcript variant 4, mRNA.	193.079	-0.559624	0.184923	-3.07352	0.0021155	0.010736
ENSMUSG00000024566	Atp9b	protein_coding	18	ATPase phospholipid transporting 9B (putative)	2024.3	-0.0115138	0.0494884	-0.232695	0.815999	0.903907
ENSMUSG00000028710	Atpaf1	protein_coding	4	ATP synthase mitochondrial F1 complex assembly factor 1	49.8003	0.185829	0.213021	0.871978	0.383221	0.587261
ENSMUSG00000042709	Atpaf2	protein_coding	11	ATP synthase mitochondrial F1 complex assembly factor 2	479.855	-0.00414448	0.0757695	-0.054711	0.956369	0.978086
ENSMUSG00000054428	Atpif1	protein_coding	4	ATPase inhibitor, mitochondrial	2816.46	0.162462	0.0539732	3.00996	0.00261283	0.012822
ENSMUSG00000032409	Atr	protein_coding	9	ATR serine/threonine kinase	1356.37	0.0647502	0.0550903	1.17529	0.239879	0.433708
ENSMUSG00000013622	Atraid	protein_coding	5	All-trans retinoic acid-induced differentiation factor	1381.09	-0.00114584	0.0566393	-0.0203225	0.983786	0.992921
ENSMUSG00000025646	Atrip	protein_coding	9	ATR-interacting protein	11.1546	-0.144569	0.331034	-0.424992	0.670843	0.814305
ENSMUSG00000027312	Atrn	protein_coding	2	Attractin	1041.06	0.0716095	0.0854247	0.83836	0.401829	0.604307
ENSMUSG00000054843	Atrnl1	protein_coding	19	Attractin-like protein 1	2066.21	0.025515	0.0544794	0.468345	0.639538	0.79278
ENSMUSG00000031229	Atrx	protein_coding	X	Transcriptional regulator ATRX	5686.75	-0.139209	0.0678781	-2.05089	0.0402781	0.118885
ENSMUSG00000046876	Atxn1	protein_coding	13	Ataxin-1	594.881	0.136475	0.0973008	1.40279	0.160679	0.329635
ENSMUSG00000016541	Atxn10	protein_coding	15	Ataxin-10	3083.64	-0.0995965	0.0474075	-2.1009	0.0356494	0.108069
ENSMUSG00000069895	Atxn1l	protein_coding	8	Ataxin-1-like	1585.55	0.167244	0.0552239	3.02837	0.00245877	0.0121651
ENSMUSG00000042605	Atxn2	protein_coding	5	ataxin 2	482.709	-0.186303	0.0848554	-2.19541	0.0281341	0.089877
ENSMUSG00000032637	Atxn2l	protein_coding	7	Mus musculus ataxin 2-like (Atxn2l), transcript variant 2, mRNA.	227.567	0.0445539	0.117103	0.380391	0.703655	0.836676
ENSMUSG00000021189	Atxn3	protein_coding	12	Ataxin-3	1064.22	0.128261	0.0582383	2.20255	0.0276264	0.0885884
ENSMUSG00000021738	Atxn7	protein_coding	14	Ataxin-7	354.613	0.261524	0.0846973	3.08777	0.00201664	0.0103093
ENSMUSG00000020564	Atxn7l1	protein_coding	12	Ataxin-7-like protein 1	64.6999	-0.257357	0.183447	-1.40231	0.160823	0.329849
ENSMUSG00000048997	Atxn7l2	protein_coding	3	ataxin 7-like 2	97.7303	0.0512863	0.150247	0.34117	0.732976	0.854963
ENSMUSG00000059995	Atxn7l3	protein_coding	11	Ataxin-7-like protein 3	1430.68	-0.13089	0.0574047	-2.28008	0.0226032	0.0755897
ENSMUSG00000074748	Atxn7l3b	protein_coding	10	ataxin 7-like 3B	3205.06	0.0360355	0.0415969	0.866309	0.386321	0.590322
ENSMUSG00000113535	AU015791	lincRNA	12	expressed sequence AU015791	8.06631	-2.63754	0.395436	-4.6576	3.19913e-06	3.22748e-05
ENSMUSG00000054753	AU018091	protein_coding	7	expressed sequence AU018091	65.0109	0.236722	0.174542	1.35127	0.176609	0.352851
ENSMUSG00000059820	AU019823	protein_coding	9	expressed sequence AU019823	247.412	0.061393	0.0980085	0.626492	0.530992	0.712375
ENSMUSG00000097415	AU020206	lincRNA	7	expressed sequence AU020206	212.229	-0.331961	0.101104	-3.27924	0.00104089	0.00584619
ENSMUSG00000051669	AU021092	protein_coding	16	UPF0764	24.4163	-0.570065	0.269835	-2.0834	0.0372144	0.111643
ENSMUSG00000105336	AU022133	processed_pseudogene	3	expressed sequence AU022133	6.00853	0.0269181	0.39888	0.0641205	0.948874	0.974696
ENSMUSG00000078584	AU022252	protein_coding	4	Uncharacterized	769.299	-0.0949235	0.0662218	-1.43375	0.151644	0.316762
ENSMUSG00000028830	AU040320	protein_coding	4	Dyslexia-associated protein KIAA0319-like protein	1397.2	0.122035	0.0519231	2.35031	0.0187578	0.0650567
ENSMUSG00000078435	AU041133	protein_coding	10	expressed sequence AU041133	253.023	-0.0150016	0.0961196	-0.156055	0.87599	0.935662
ENSMUSG00000021460	Auh	protein_coding	13	AU RNA binding methylglutaconyl-CoA hydratase	490.936	0.188893	0.0787359	2.39959	0.0164136	0.0582026
ENSMUSG00000078521	Aunip	protein_coding	4	Aurora kinase A and ninein-interacting protein	227.107	-0.363568	0.0922994	-3.9316	8.43827e-05	0.000638702
ENSMUSG00000068328	Aup1	protein_coding	6	ancient ubiquitous protein 1 isoform 2	1270.24	0.0170028	0.0558056	0.30468	0.76061	0.871086
ENSMUSG00000027496	Aurka	protein_coding	2	Aurora kinase A	1084.54	-0.0466775	0.0779602	-0.59839	0.549579	0.726233
ENSMUSG00000065990	Aurkaip1	protein_coding	4	Aurora kinase A-interacting protein	1627.46	-0.121379	0.0489143	-2.48147	0.0130841	0.0484522
ENSMUSG00000020897	Aurkb	protein_coding	11	Aurora kinase B	972.663	-0.117884	0.0513889	-2.29277	0.0218615	0.0735346
ENSMUSG00000029673	Auts2	protein_coding	5	Autism susceptibility 2 protein homolog	108.148	-0.0847906	0.169803	-0.499984	0.617086	0.777244
ENSMUSG00000087519	AV039307	processed_transcript	2	expressed sequence AV039307	7.24111	0.554287	0.389159	1.42398	0.154452	0.320822
ENSMUSG00000087377	AV099323	antisense	2	expressed sequence AV099323	4.84963	-0.141962	0.404771	-0.33519	0.737482
ENSMUSG00000108461	AV356131	bidirectional_promoter_lncRNA	7	expressed sequence AV356131	11.1653	-0.104378	0.349354	-0.296261	0.767031	0.874175
ENSMUSG00000003604	Aven	protein_coding	2	Cell death regulator Aven	397.723	0.0529408	0.0845571	0.626035	0.531292	0.712513
ENSMUSG00000025432	Avil	protein_coding	10	Advillin	31.421	0.41623	0.249147	1.65878	0.0971611	0.232906
ENSMUSG00000029787	Avl9	protein_coding	6	Late secretory pathway	1151.39	0.223734	0.0631486	3.54302	0.000395574	0.00250386
ENSMUSG00000018821	Avpi1	protein_coding	19	Arginine vasopressin-induced protein 1	1020.26	-0.0106662	0.0619782	-0.172043	0.863404	0.930054
ENSMUSG00000020123	Avpr1a	protein_coding	10	arginine vasopressin receptor 1A	35.5776	-0.19553	0.249795	-0.790758	0.429085	0.626594
ENSMUSG00000078349	AW011738	protein_coding	4	expressed sequence AW011738	8.71497	0.397389	0.375967	1.07609	0.281888	0.481994
ENSMUSG00000110419	AW046200	bidirectional_promoter_lncRNA	8	expressed sequence AW046200	5.25635	0.149688	0.398923	0.362585	0.716915
ENSMUSG00000074166	AW146154	protein_coding	7	expressed sequence AW146154	139.702	0.195952	0.131919	1.48652	0.137141	0.295256
ENSMUSG00000039182	AW209491	protein_coding	13	UPF0415	304.906	0.0937488	0.0951321	0.985571	0.324343	0.528104
ENSMUSG00000041935	AW549877	protein_coding	15	UPF0600	1178.91	0.0731184	0.0607669	1.20334	0.228846	0.419479
ENSMUSG00000033632	AW554918	protein_coding	18	Protein hinderin	269.462	0.0331899	0.0914849	0.36275	0.716792	0.845194
ENSMUSG00000031220	Awat2	protein_coding	X	Acyl-CoA wax alcohol acyltransferase 2	6.5466	-0.390716	0.389669	-0.999441	0.317581	0.521084
ENSMUSG00000026601	Axdnd1	protein_coding	1	Mus musculus axonemal dynein light chain domain containing 1 (Axdnd1), mRNA.	12.3714	-0.259414	0.336637	-0.770049	0.441271	0.637881
ENSMUSG00000024182	Axin1	protein_coding	17	axin 1	1259.54	0.091221	0.0527497	1.72932	0.0837512	0.20754
ENSMUSG00000000142	Axin2	protein_coding	11	Axin-2	6.4539	0.386618	0.409203	1.08092	0.279733	0.479392
ENSMUSG00000002602	Axl	protein_coding	7	AXL receptor tyrosine kinase	7712.33	0.302904	0.0466277	6.49618	8.23876e-11	1.5096e-09
ENSMUSG00000039285	Azi2	protein_coding	9	5-azacytidine-induced protein 2	1432.15	-0.043283	0.047776	-0.905935	0.36497	0.570173
ENSMUSG00000037458	Azin1	protein_coding	15	Antizyme inhibitor 1	7620.34	0.0410472	0.0452531	0.907048	0.364381	0.569437
ENSMUSG00000028789	Azin2	protein_coding	4	Antizyme inhibitor 2	468.736	0.393137	0.0747937	5.25664	1.46713e-07	1.81205e-06
ENSMUSG00000075596	B130006D01Rik	protein_coding	11	RIKEN cDNA B130006D01 gene	5.73208	0.661873	0.396638	1.6103	0.107332	0.249348
ENSMUSG00000100005	B130024G19Rik	processed_transcript	7	RIKEN cDNA B130024G19 gene	9.05687	-0.0834665	0.380244	-0.233066	0.81571	0.903902
ENSMUSG00000093606	B130034C11Rik	processed_transcript	16	RIKEN cDNA B130034C11 gene	7.40724	-0.325236	0.377395	-0.849307	0.39571	0.599229
ENSMUSG00000086502	B130055M24Rik	processed_transcript	7	RIKEN cDNA B130055M24 gene	75.0947	0.461299	0.181306	2.54091	0.0110563	0.0422972
ENSMUSG00000027165	B230118H07Rik	protein_coding	2	Uncharacterized	523.208	0.101026	0.0851565	1.18644	0.23545	0.428137
ENSMUSG00000086003	B230206L02Rik	processed_transcript	11	RIKEN cDNA B230206L02 gene	19.1718	0.510271	0.312438	1.65113	0.0987113	0.235645
ENSMUSG00000097378	B230208H11Rik	lincRNA	10	RIKEN cDNA B230208H11 gene	10.2068	-0.392108	0.363797	-1.08657	0.277225	0.476727
ENSMUSG00000089706	B230216N24Rik	processed_transcript	1	RIKEN cDNA B230216N24 gene	9.63073	-0.160452	0.360034	-0.440201	0.659791	0.806208
ENSMUSG00000050538	B230217C12Rik	protein_coding	11	RIKEN cDNA B230217C12 gene	15.0539	0.682135	0.322835	2.11355	0.0345538	0.10559
ENSMUSG00000097785	B230217O12Rik	lincRNA	19	RIKEN cDNA B230217O12 gene	12.7097	0.486282	0.337391	1.43005	0.152703	0.318103
ENSMUSG00000045767	B230219D22Rik	protein_coding	13	UPF0461	3498.66	-0.152742	0.0370844	-4.11888	3.8071e-05	0.000313435
ENSMUSG00000080717	B230307C23Rik	protein_coding	16	RIKEN cDNA B230307C23 gene	52.9846	0.0785899	0.192665	0.407131	0.683912	0.824149
ENSMUSG00000084843	B230312C02Rik	lincRNA	2	RIKEN cDNA B230312C02 gene	10.6153	0.535455	0.373969	1.43766	0.15053	0.315209
ENSMUSG00000045746	B230317F23Rik	lincRNA	8	RIKEN cDNA B230317F23 gene	3.15422	-0.0702684	0.414187	-0.164917	0.869009
ENSMUSG00000051844	B230319C09Rik	processed_transcript	6	RIKEN cDNA B230319C09 gene	3.16311	-0.16042	0.413903	-0.366184	0.714228
ENSMUSG00000097509	B230322F03Rik	antisense	7	RIKEN cDNA B230322F03 gene	5.92665	-0.34059	0.40806	-0.872141	0.383132	0.587249
ENSMUSG00000097119	B230354K17Rik	lincRNA	17	RIKEN cDNA B230354K17 gene	1136.46	-0.0394961	0.0600187	-0.658147	0.510444	0.697428
ENSMUSG00000086350	B230369F24Rik	antisense	1	RIKEN cDNA B230369F24 gene	17.0035	-0.0450197	0.344087	-0.132689	0.894439	0.945721
ENSMUSG00000104195	B230377A18Rik	TEC	5	RIKEN cDNA B230377A18 gene	12.6619	0.148753	0.348791	0.439129	0.660568	0.806574
ENSMUSG00000087660	B230398E01Rik	antisense	3	RIKEN cDNA B230398E01 gene	1.49944	0.600726	0.382293	1.35725	0.174702
ENSMUSG00000060802	B2m	protein_coding	2	Beta-2-microglobulin	6102.56	-0.0291546	0.0461074	-0.632354	0.527156	0.710007
ENSMUSG00000048406	B330016D10Rik	pseudogene	4	RIKEN cDNA B330016D10 gene	38.1021	-0.00834695	0.241612	-0.0346244	0.972379	0.987613
ENSMUSG00000043300	B3galnt1	protein_coding	3	UDP-GalNAc:beta-1,3-N-acetylgalactosaminyltransferase 1	522.375	0.111158	0.0818408	1.35829	0.174372	0.349542
ENSMUSG00000039242	B3galnt2	protein_coding	13	UDP-GalNAc:beta-1,3-N-acetylgalactosaminyltransferase 2	1324.2	0.0902567	0.0558576	1.61587	0.106123	0.247335
ENSMUSG00000034780	B3galt1	protein_coding	2	Beta-1,3-galactosyltransferase 1	9.79762	-0.240205	0.370851	-0.66186	0.508061	0.695654
ENSMUSG00000033849	B3galt2	protein_coding	1	Beta-1,3-galactosyltransferase 2	24.2903	-0.701097	0.373882	-2.13768	0.0325424	0.100872
ENSMUSG00000067370	B3galt4	protein_coding	17	Beta-1,3-galactosyltransferase 4	34.8515	0.037129	0.247345	0.150739	0.880181	0.937832
ENSMUSG00000074892	B3galt5	protein_coding	16	Mus musculus UDP-Gal:betaGlcNAc beta 1,3-galactosyltransferase, polypeptide 5 (B3galt5), transcript variant 4, mRNA.	88.1939	-2.35621	0.293674	-6.93781	3.98236e-12	8.49159e-11
ENSMUSG00000050796	B3galt6	protein_coding	4	Beta-1,3-galactosyltransferase 6	276.3	-0.317479	0.0982945	-3.23209	0.0012289	0.0067655
ENSMUSG00000071649	B3gat3	protein_coding	19	Galactosylgalactosylxylosylprotein 3-beta-glucuronosyltransferase 3	341.623	-0.201429	0.0960869	-2.09662	0.036027	0.108826
ENSMUSG00000051950	B3glct	protein_coding	5	Beta-1,3-glucosyltransferase	486.166	-0.153316	0.0760131	-2.01734	0.0436598	0.126669
ENSMUSG00000051650	B3gnt2	protein_coding	11	N-acetyllactosaminide beta-1,3-N-acetylglucosaminyltransferase 2	4.48374	-0.0495458	0.410596	-0.12372	0.901537
ENSMUSG00000029431	B3gnt4	protein_coding	5	N-acetyllactosaminide beta-1,3-N-acetylglucosaminyltransferase 4	3.1485	0.507277	0.414116	1.13282	0.257288
ENSMUSG00000022686	B3gnt5	protein_coding	16	Lactosylceramide 1,3-N-acetyl-beta-D-glucosaminyltransferase	391.922	-0.13726	0.0813952	-1.68489	0.0920098	0.22341
ENSMUSG00000059479	B3gnt8	protein_coding	7	UDP-GlcNAc:betaGal beta-1,3-N-acetylglucosaminyltransferase 8	37.5066	-0.355119	0.233516	-1.5116	0.130637	0.286197
ENSMUSG00000069920	B3gnt9	protein_coding	8	UDP-GlcNAc:betaGal beta-1,3-N-acetylglucosaminyltransferase 9	276.22	0.0654159	0.101605	0.644681	0.519134	0.704119
ENSMUSG00000046605	B3gntl1	protein_coding	11	UDP-GlcNAc:betaGal beta-1,3-N-acetylglucosaminyltransferase-like protein 1	66.8345	0.127353	0.176708	0.720054	0.471492	0.664819
ENSMUSG00000053706	B430305J03Rik	protein_coding	3	RIKEN cDNA B430305J03 gene	13.1387	-0.597118	0.344395	-1.71306	0.0867007	0.213096
ENSMUSG00000006731	B4galnt1	protein_coding	10	Beta-1,4 N-acetylgalactosaminyltransferase 1	273.619	0.342125	0.105951	3.22949	0.0012401	0.0068168
ENSMUSG00000041372	B4galnt3	protein_coding	6	Beta-1,4-N-acetylgalactosaminyltransferase 3	19.9411	-0.661276	0.307277	-2.14833	0.0316878	0.0988373
ENSMUSG00000055629	B4galnt4	protein_coding	7	N-acetyl-beta-glucosaminyl-glycoprotein 4-beta-N-acetylgalactosaminyltransferase 1	44.676	0.742734	0.210362	3.50854	0.000450571	0.00279927
ENSMUSG00000028413	B4galt1	protein_coding	4	Beta-1,4-galactosyltransferase 1 Lactose synthase A protein N-acetyllactosamine synthase Beta-N-acetylglucosaminylglycopeptide beta-1,4-galactosyltransferase Beta-N-acetylglucosaminyl-glycolipid beta-1,4-galactosyltransferase Processed beta-1,4-galactosyltransferase 1	1366.18	-0.176007	0.0645373	-2.72774	0.00637693	0.0268388
ENSMUSG00000028541	B4galt2	protein_coding	4	Beta-1,4-galactosyltransferase 2 Lactose synthase A protein N-acetyllactosamine synthase Beta-N-acetylglucosaminylglycopeptide beta-1,4-galactosyltransferase Beta-N-acetylglucosaminyl-glycolipid beta-1,4-galactosyltransferase	892.899	-0.065028	0.0598156	-1.08718	0.276959	0.476446
ENSMUSG00000052423	B4galt3	protein_coding	1	Beta-1,4-galactosyltransferase 3 N-acetyllactosamine synthase Beta-N-acetylglucosaminylglycopeptide beta-1,4-galactosyltransferase Beta-N-acetylglucosaminyl-glycolipid beta-1,4-galactosyltransferase	454.919	-0.223212	0.0784958	-2.84334	0.00446434	0.0200325
ENSMUSG00000022793	B4galt4	protein_coding	16	Beta-1,4-galactosyltransferase 4 N-acetyllactosamine synthase Lactotriaosylceramide beta-1,4-galactosyltransferase	389.8	-0.00467704	0.0991996	-0.0475574	0.962069	0.981554
ENSMUSG00000017929	B4galt5	protein_coding	2	Beta-1,4-galactosyltransferase 5	1521.66	-0.0338206	0.050806	-0.665819	0.505527	0.69373
ENSMUSG00000056124	B4galt6	protein_coding	18	Beta-1,4-galactosyltransferase 6 Glucosylceramide beta-1,4-galactosyltransferase	718.611	-0.275077	0.0774173	-3.55312	0.000380689	0.00242771
ENSMUSG00000021504	B4galt7	protein_coding	13	Beta-1,4-galactosyltransferase 7 Xylosylprotein 4-beta-galactosyltransferase	620.279	0.38643	0.0666695	5.79579	6.79987e-09	1.00006e-07
ENSMUSG00000047379	B4gat1	protein_coding	19	Beta-1,4-glucuronyltransferase 1	1167.99	-0.0168928	0.0577802	-0.292426	0.769961	0.876344
ENSMUSG00000052364	B630019K06Rik	protein_coding	X	RIKEN cDNA B630019K06 gene	82.6405	0.48116	0.170422	2.82392	0.00474406	0.0210447
ENSMUSG00000091993	B930036N10Rik	antisense	1	RIKEN cDNA B930036N10 gene	24.1781	0.174124	0.265914	0.653479	0.513447	0.699878
ENSMUSG00000110282	B930086L07Rik	TEC	7	RIKEN cDNA B930086L07 gene	14.9778	-0.406668	0.345721	-1.14437	0.252472	0.448181
ENSMUSG00000092124	B930094E09Rik	protein_coding	18	RIKEN cDNA B930094E09 gene	9.19658	0.194805	0.381526	0.514056	0.607213	0.770312
ENSMUSG00000085133	B930095G15Rik	sense_intronic	14	RIKEN cDNA B930095G15 gene	32.8754	0.295786	0.247856	1.1864	0.235465	0.428137
ENSMUSG00000001039	B9d1	protein_coding	11	B9 domain-containing protein 1	259.935	0.125196	0.0969058	1.29179	0.196432	0.37945
ENSMUSG00000063439	B9d2	protein_coding	7	B9 domain-containing protein 2	175.214	-0.00665062	0.128651	-0.0517317	0.958743	0.979486
ENSMUSG00000022296	Baalc	protein_coding	15	Brain and acute leukemia cytoplasmic protein	161.314	-0.506782	0.121598	-4.16233	3.1501e-05	0.000261881
ENSMUSG00000031820	Babam1	protein_coding	8	BRISC and BRCA1-A complex member 1	788.881	0.0801798	0.0617124	1.29919	0.193877	0.375923
ENSMUSG00000052139	Babam2	protein_coding	5	BRISC and BRCA1-A complex member 2	706.577	-0.0968551	0.0697476	-1.38871	0.16492	0.33584
ENSMUSG00000032086	Bace1	protein_coding	9	Beta-secretase 1	1324.6	0.194655	0.0527782	3.68864	0.000225459	0.00152027
ENSMUSG00000040605	Bace2	protein_coding	16	beta-site APP-cleaving enzyme 2	78.3359	-1.63784	0.191658	-8.45754	2.73083e-17	8.5269e-16
ENSMUSG00000025612	Bach1	protein_coding	16	Transcription regulator protein BACH1	2138.57	-0.121391	0.0455685	-2.664	0.00772177	0.0315171
ENSMUSG00000040270	Bach2	protein_coding	4	Transcription regulator protein BACH2	17.7736	-0.431138	0.324883	-1.34139	0.179794	0.357881
ENSMUSG00000024959	Bad	protein_coding	19	Bcl2-associated agonist of cell death	613.225	0.0730464	0.072364	1.00941	0.31278	0.516194
ENSMUSG00000028416	Bag1	protein_coding	4	BAG family molecular chaperone regulator 1	6047.6	0.0211627	0.0463385	0.456701	0.647886	0.798507
ENSMUSG00000042215	Bag2	protein_coding	1	BAG family molecular chaperone regulator 2	854.466	0.256028	0.0674304	3.79646	0.00014678	0.00103738
ENSMUSG00000030847	Bag3	protein_coding	7	BAG family molecular chaperone regulator 3	405.023	0.177637	0.104832	1.69514	0.0900495	0.219663
ENSMUSG00000037316	Bag4	protein_coding	8	BAG family molecular chaperone regulator 4	719.754	-0.0318571	0.0635406	-0.501294	0.616164	0.776753
ENSMUSG00000049792	Bag5	protein_coding	12	BAG family molecular chaperone regulator 5	1251.86	-0.00282071	0.0525201	-0.0537228	0.957156	0.978516
ENSMUSG00000024392	Bag6	protein_coding	17	Large proline-rich protein BAG6	1691.5	-0.109884	0.0597375	-1.83974	0.0658064	0.174242
ENSMUSG00000039741	Bahcc1	protein_coding	11	Mus musculus BAH domain and coiled-coil containing 1 (Bahcc1), transcript variant 2, mRNA.	118.967	0.0246877	0.138713	0.17797	0.858746	0.927768
ENSMUSG00000040007	Bahd1	protein_coding	2	bromo adjacent homology domain containing 1	484.646	0.320774	0.0775697	4.13582	3.53691e-05	0.000292859
ENSMUSG00000025372	Baiap2	protein_coding	11	Brain-specific angiosis inhibitor 1-associated protein 2	1115.37	0.209211	0.054464	3.84083	0.000122621	0.000881959
ENSMUSG00000038859	Baiap2l1	protein_coding	5	Brain-specific angiosis inhibitor 1-associated protein 2-like protein 1	1100.83	-0.767941	0.0855929	-8.9736	2.86967e-19	1.0269e-17
ENSMUSG00000018126	Baiap2l2	protein_coding	15	Brain-specific angiosis inhibitor 1-associated protein 2-like protein 2	2.91253	0.0876162	0.411918	0.230499	0.817704
ENSMUSG00000057789	Bak1	protein_coding	17	Bcl-2 homologous antagonist/killer	841.622	0.0392361	0.0693406	0.565839	0.571503	0.742005
ENSMUSG00000024232	Bambi	protein_coding	18	BMP and activin membrane-bound inhibitor homolog	17.8904	0.261011	0.30237	0.849908	0.395376	0.599158
ENSMUSG00000081219	Bambi-ps1	processed_pseudogene	2	BMP and activin membrane-bound inhibitor, pseudogene (Xenopus laevis)	2.79193	0.760566	0.40674	1.79612	0.0724758
ENSMUSG00000024844	Banf1	protein_coding	19	Barrier-to-autointegration factor Barrier-to-autointegration factor, N-terminally processed	1918.57	-0.19022	0.0541125	-3.51495	0.000439841	0.00273967
ENSMUSG00000025316	Banp	protein_coding	8	Protein BANP	552.946	-0.114538	0.0717139	-1.59755	0.110143	0.253625
ENSMUSG00000021901	Bap1	protein_coding	14	Ubiquitin carboxyl-terminal hydrolase BAP1	1671.77	0.0876507	0.0561399	1.56129	0.118456	0.266956
ENSMUSG00000026196	Bard1	protein_coding	1	BRCA1-associated RING domain protein 1	290.973	-0.209493	0.0813981	-2.57014	0.0101658	0.0395391
ENSMUSG00000032033	Barx2	protein_coding	9	Homeobox protein BarH-like 2	6.78088	-1.19709	0.389719	-2.8847	0.00391782	0.0180038
ENSMUSG00000045763	Basp1	protein_coding	15	Brain acid soluble protein 1	5984.16	0.202338	0.0427877	4.72879	2.25861e-06	2.35081e-05
ENSMUSG00000034266	Batf	protein_coding	12	Basic leucine zipper transcriptional factor ATF-like	3.6077	0.582206	0.411731	1.34208	0.179569
ENSMUSG00000003873	Bax	protein_coding	7	Apoptosis regulator BAX	1032.81	0.206049	0.0623431	3.30464	0.000950997	0.00540007
ENSMUSG00000035021	Baz1a	protein_coding	12	Bromodomain adjacent to zinc finger domain protein 1A	1698.27	0.0441695	0.0559027	0.790091	0.429475	0.626969
ENSMUSG00000002748	Baz1b	protein_coding	5	Tyrosine-protein kinase BAZ1B	4906.54	0.0192532	0.0447121	0.430606	0.666755	0.811114
ENSMUSG00000040054	Baz2a	protein_coding	10	bromodomain adjacent to zinc finger domain 2A	618.17	0.0916245	0.0903672	1.01394	0.310613	0.513497
ENSMUSG00000026987	Baz2b	protein_coding	2	bromodomain adjacent to zinc finger domain, 2B	1318.9	0.0668518	0.0649276	1.02968	0.303162	0.505689
ENSMUSG00000084938	BB557941	processed_transcript	2	expressed sequence BB557941	3.67841	0.241151	0.412038	0.558403	0.576569
ENSMUSG00000002083	Bbc3	protein_coding	7	Bcl-2-binding component 3	205.258	-0.294642	0.120543	-2.44512	0.0144802	0.0526246
ENSMUSG00000084957	Bbip1	protein_coding	19	BBSome interacting protein 1	684.725	-0.117199	0.0720334	-1.62694	0.10375	0.244175
ENSMUSG00000057265	Bbof1	protein_coding	12	Basal body-orientation factor 1	28.0839	0.405477	0.260948	1.55485	0.119981	0.269426
ENSMUSG00000006464	Bbs1	protein_coding	19	Bardet-Biedl syndrome 1 protein homolog	305.223	0.00213254	0.100008	0.0211799	0.983102	0.992577
ENSMUSG00000035759	Bbs10	protein_coding	10	Bardet-Biedl syndrome 10 protein homolog	200.656	0.143145	0.115444	1.24056	0.214769	0.402348
ENSMUSG00000051444	Bbs12	protein_coding	3	Bardet-Biedl syndrome 12 protein homolog	190.402	-0.214457	0.112262	-1.91016	0.0561129	0.153932
ENSMUSG00000031755	Bbs2	protein_coding	8	Bardet-Biedl syndrome 2 protein homolog	808.664	-0.0533461	0.0653114	-0.817126	0.413856	0.614662
ENSMUSG00000025235	Bbs4	protein_coding	9	Bardet-Biedl syndrome 4 protein homolog	336.628	0.270634	0.0889492	3.04323	0.00234055	0.0116801
ENSMUSG00000063145	Bbs5	protein_coding	2	Bardet-Biedl syndrome 5 protein homolog	320.78	0.065074	0.0863071	0.754007	0.450845	0.646485
ENSMUSG00000037325	Bbs7	protein_coding	3	Bardet-Biedl syndrome 7 protein homolog	278.925	0.338773	0.0983156	3.44503	0.000571001	0.0034583
ENSMUSG00000035919	Bbs9	protein_coding	9	Protein PTHB1	492.346	0.247227	0.0741962	3.33284	0.000859631	0.0049375
ENSMUSG00000022641	Bbx	protein_coding	16	HMG box transcription factor BBX	3256.4	-0.07756	0.0601474	-1.28948	0.197233	0.380693
ENSMUSG00000060149	BC002059	lincRNA	17	cDNA sequence BC002059	190.096	0.0179111	0.118576	0.151065	0.879924	0.937832
ENSMUSG00000081824	BC002163	processed_pseudogene	16	cDNA sequence BC002163	8.40925	0.00307728	0.36677	0.00850121	0.993217	0.996817
ENSMUSG00000104465	BC002189	sense_intronic	3	cDNA sequence BC002189	3.70114	-0.847698	0.41342	-1.99389	0.0461642
ENSMUSG00000006010	BC003331	protein_coding	1	odr-4 GPCR localization factor homolog	1601.26	0.0438316	0.0544378	0.805188	0.420711	0.620508
ENSMUSG00000067722	BC003965	protein_coding	17	Protein CCSMST1	499.958	0.0605768	0.0754416	0.802972	0.421991	0.621579
ENSMUSG00000052712	BC004004	protein_coding	17	Bombesin receptor-activated	1739.19	-0.094687	0.0517361	-1.83044	0.0671836	0.176724
ENSMUSG00000019132	BC005537	protein_coding	13	Uncharacterized	2258.58	-0.00049503	0.0562428	-0.00880433	0.992975	0.996817
ENSMUSG00000079065	BC005561	protein_coding	5	cDNA sequence BC005561	505.311	-0.0557148	0.0818475	-0.680622	0.49611	0.685948
ENSMUSG00000026851	BC005624	protein_coding	2	Telomere length and silencing	577.061	0.2247	0.0826858	2.7173	0.00658175	0.0275023
[truncated: 15,113 more rows]

## Sheet: P_vs_C_day_0
id	gene_name	biotype	chromosome	description	baseMean	log2FoldChange	lfcSE	stat	pvalue	padj
ENSMUSG00000037280	Galnt6	protein_coding	15	Polypeptide N-acetylgalactosaminyltransferase 6	455.776	-5.38272	0.192912	-24.4573	4.20665e-132	1.10286e-129
ENSMUSG00000068614	Actc1	protein_coding	2	Actin, alpha cardiac muscle 1	11052.2	-4.65717	0.0797627	-58.2868	0	0
ENSMUSG00000058914	C1qtnf3	protein_coding	15	Complement C1q tumor necrosis factor-related protein 3	11520.3	-4.4513	0.108268	-41.0726	0	0
ENSMUSG00000030399	Ckm	protein_coding	7	creatine kinase, muscle	3729.56	-4.44779	0.12877	-34.3942	3.07695e-259	4.30235e-256
ENSMUSG00000030827	Fgf21	protein_coding	7	Fibroblast growth factor 21	562.534	-4.38773	0.194627	-21.9842	4.07794e-107	7.60264e-105
ENSMUSG00000018893	Mb	protein_coding	15	myoglobin	724.768	-4.33787	0.21418	-19.8224	1.90635e-87	2.66555e-85
ENSMUSG00000030996	Art1	protein_coding	7	ADP-ribosyltransferase 1	176.546	-4.30198	0.241932	-15.2877	9.2329e-53	7.0099e-51
ENSMUSG00000018845	Unc45b	protein_coding	11	unc-45 myosin chaperone B	942.784	-4.28298	0.131809	-31.7857	1.0205e-221	7.13455e-219
ENSMUSG00000033044	Dhrs7c	protein_coding	11	Dehydrogenase/reductase SDR family member 7C	323.384	-4.24148	0.198494	-19.6458	6.27458e-86	8.4225e-84
ENSMUSG00000051985	Igfn1	protein_coding	1	Immunoglobulin-like and fibronectin type III domain-containing protein 1	247.099	-4.2055	0.162766	-24.9441	2.47523e-137	6.92197e-135
ENSMUSG00000097768	2310043M15Rik	antisense	16	RIKEN cDNA 2310043M15 gene	107.721	-4.11697	0.290085	-10.467	1.22441e-25	4.61673e-24
ENSMUSG00000044288	Cnr1	protein_coding	4	Mus musculus cannabinoid receptor 1 (brain) (Cnr1), transcript variant 2, mRNA.	112.356	-4.09769	0.224139	-16.3157	7.62702e-60	6.7002e-58
ENSMUSG00000026407	Cacna1s	protein_coding	1	calcium voltage-gated channel subunit alpha1 S	1309.32	-4.0587	0.171703	-23.4247	2.39575e-121	5.58309e-119
ENSMUSG00000026418	Tnni1	protein_coding	1	Troponin I, slow skeletal muscle	9810.09	-4.05593	0.115386	-35.1203	3.29888e-270	6.91899e-267
ENSMUSG00000031097	Tnni2	protein_coding	7	Troponin I, fast skeletal muscle	3404.45	-4.05253	0.138081	-29.2601	3.33664e-188	1.64663e-185
ENSMUSG00000031957	Ctrb1	protein_coding	8	Chymotrypsinogen B Chymotrypsin B chain A Chymotrypsin B chain B Chymotrypsin B chain C	39.0636	-4.02587	0.335703	-6.2388	4.40945e-10	5.66076e-09
ENSMUSG00000075307	Klhl41	protein_coding	2	Kelch-like protein 41	3328.57	-4.01994	0.0882317	-45.4018	0	0
ENSMUSG00000022519	Srl	protein_coding	16	Sarcalumenin	5715.27	-4.00421	0.105237	-37.9952	0	0
ENSMUSG00000038670	Mybpc2	protein_coding	7	Myosin-binding protein C, fast-type	128.952	-3.99849	0.258072	-13.2221	6.53813e-40	3.84924e-38
ENSMUSG00000001334	Fndc5	protein_coding	4	Fibronectin type III domain-containing protein 5 Irisin	407.675	-3.98523	0.16396	-23.322	2.6508e-120	5.77634e-118
ENSMUSG00000038239	Hrc	protein_coding	7	histidine rich calcium binding protein	904.101	-3.96769	0.116002	-33.6415	4.1497e-248	3.86821e-245
ENSMUSG00000048442	Smim5	protein_coding	11	Small integral membrane protein 5	116.424	-3.95093	0.253299	-13.2967	2.42e-40	1.42976e-38
ENSMUSG00000020475	Pgam2	protein_coding	11	phosphoglycerate mutase 2	387.375	-3.94523	0.160275	-23.8347	1.46021e-125	3.55085e-123
ENSMUSG00000036067	Slc2a6	protein_coding	2	solute carrier family 2 (facilitated glucose transporter), member 6	319.375	-3.94457	0.171692	-21.4963	1.68544e-102	2.91546e-100
ENSMUSG00000053093	Myh7	protein_coding	14	Myosin-7	1795.53	-3.94058	0.257367	-15.2101	3.0319e-52	2.29155e-50
ENSMUSG00000017300	Tnnc2	protein_coding	2	Troponin C, skeletal muscle	4962.46	-3.93416	0.116622	-33.6752	1.33421e-248	1.39917e-245
ENSMUSG00000019278	Dpep1	protein_coding	8	Dipeptidase 1	101.349	-3.92171	0.272824	-12.2926	9.9222e-35	5.13841e-33
ENSMUSG00000005716	Pvalb	protein_coding	15	parvalbumin	46.9556	-3.91671	0.312983	-9.78864	1.25975e-22	4.11232e-21
ENSMUSG00000032648	Pygm	protein_coding	19	Glycogen phosphorylase, muscle form	477.682	-3.90326	0.168723	-22.3776	6.49859e-111	1.2679e-108
ENSMUSG00000056632	Dsg3	protein_coding	18	desmoglein 3	50.874	-3.90276	0.283779	-11.1477	7.3499e-29	3.11424e-27
ENSMUSG00000038623	Tm6sf1	protein_coding	7	transmembrane 6 superfamily member 1	279.318	-3.89889	0.158802	-23.4183	2.78213e-121	6.3947e-119
ENSMUSG00000030730	Atp2a1	protein_coding	7	Sarcoplasmic/endoplasmic reticulum calcium ATPase 1	1992.56	-3.87888	0.148318	-26.0468	1.46372e-149	4.81563e-147
ENSMUSG00000087364	Gm13398	antisense	2	predicted gene 13398	78.5772	-3.87336	0.289665	-9.73961	2.04337e-22	6.55559e-21
ENSMUSG00000025172	Ankrd2	protein_coding	19	Ankyrin repeat domain-containing protein 2	635.601	-3.8689	0.196457	-19.3524	1.94519e-83	2.4726e-81
ENSMUSG00000020908	Myh3	protein_coding	11	Myosin-3	21751.8	-3.8282	0.149922	-25.5256	1.02604e-143	3.07428e-141
ENSMUSG00000061723	Tnnt3	protein_coding	7	troponin T3, skeletal, fast	7624.43	-3.8231	0.132934	-28.7343	1.42219e-181	6.62861e-179
ENSMUSG00000007034	Slc44a4	protein_coding	17	solute carrier family 44, member 4	83.4658	-3.8221	0.273655	-11.712	1.10598e-31	5.25699e-30
ENSMUSG00000042451	Mybph	protein_coding	1	Mus musculus myosin binding protein H (Mybph), transcript variant 2, mRNA.	6340.71	-3.81989	0.11504	-33.1628	3.69874e-241	3.10306e-238
ENSMUSG00000006221	Hspb7	protein_coding	4	Heat shock protein beta-7	90.9478	-3.81848	0.244189	-13.661	1.73519e-42	1.08233e-40
ENSMUSG00000009487	Otog	protein_coding	7	otogelin	197.309	-3.81466	0.196082	-18.0489	8.05243e-73	8.66101e-71
ENSMUSG00000031972	Acta1	protein_coding	8	Actin, alpha skeletal muscle	28109	-3.79481	0.119153	-31.8426	1.66471e-222	1.21445e-219
ENSMUSG00000037139	Myom3	protein_coding	4	Myomesin-3	1244.15	-3.78346	0.161659	-23.2453	1.58782e-119	3.33026e-117
ENSMUSG00000078949	R3hdml	protein_coding	2	R3H domain containing-like	146.238	-3.78099	0.270453	-12.3519	4.75869e-35	2.49519e-33
ENSMUSG00000052374	Actn2	protein_coding	13	Alpha-actinin-2	533.671	-3.77405	0.227467	-16.2293	3.13262e-59	2.7094e-57
ENSMUSG00000037940	Inpp4b	protein_coding	8	Type II inositol 3,4-bisphosphate 4-phosphatase	586.256	-3.77088	0.129449	-28.6589	1.24122e-180	5.62877e-178
ENSMUSG00000087591	Gm14635	lincRNA	X	predicted gene 14635	75.5404	-3.76711	0.265469	-12.1682	4.58937e-34	2.33349e-32
ENSMUSG00000043760	Pkhd1	protein_coding	1	PKHD1, fibrocystin/polyductin	257.258	-3.76492	0.240508	-15.1179	1.235e-51	9.20983e-50
ENSMUSG00000006542	Prkag3	protein_coding	1	protein kinase, AMP-activated, gamma 3 non-catatlytic subunit	311.598	-3.76121	0.171477	-21.0222	4.10799e-98	6.62769e-96
ENSMUSG00000079428	Tceal7	protein_coding	X	Transcription elongation factor A protein-like 7	386.407	-3.7576	0.202123	-18.2548	1.89361e-74	2.07666e-72
ENSMUSG00000042828	Trim72	protein_coding	7	Tripartite motif-containing protein 72	1545.08	-3.73832	0.174352	-21.3272	6.34502e-101	1.08636e-98
ENSMUSG00000027861	Casq2	protein_coding	3	Mus musculus calsequestrin 2 (Casq2), transcript variant 1, mRNA.	7832.56	-3.73514	0.1201	-31.0738	5.45047e-212	3.38717e-209
ENSMUSG00000024049	Myom1	protein_coding	17	Myomesin-1	1231.53	-3.72786	0.134964	-27.4333	1.09798e-165	4.09402e-163
ENSMUSG00000032735	Ablim3	protein_coding	18	actin binding LIM protein family, member 3	228.391	-3.70697	0.207252	-16.5972	7.30022e-62	6.65709e-60
ENSMUSG00000030672	Mylpf	protein_coding	7	Mus musculus myosin light chain, phosphorylatable, fast skeletal muscle (Mylpf), transcript variant 2, mRNA.	21119.4	-3.6897	0.107979	-34.1622	8.79865e-256	1.05452e-252
ENSMUSG00000002007	Srpk3	protein_coding	X	serine/arginine-rich protein specific kinase 3	351.487	-3.68947	0.152676	-23.2887	5.77445e-120	1.24217e-117
ENSMUSG00000028834	Trim63	protein_coding	4	tripartite motif-containing 63	376.22	-3.68793	0.167229	-21.3024	1.07886e-100	1.81022e-98
ENSMUSG00000020176	Grb10	protein_coding	11	Growth factor receptor-bound protein 10	32.2904	-3.6849	0.316459	-9.37363	7.00802e-21	2.05933e-19
ENSMUSG00000009214	Mymk	protein_coding	2	Protein myomaker	970.546	-3.68437	0.112809	-32.2812	1.28426e-228	9.79485e-226
ENSMUSG00000069372	Ctxn3	protein_coding	18	Cortexin-3	137.219	-3.6793	0.244327	-13.4203	4.60125e-41	2.7573e-39
ENSMUSG00000038403	Hfe2	protein_coding	3	Hemojuvelin	1293.21	-3.66799	0.106489	-34.1929	3.08737e-256	3.98485e-253
ENSMUSG00000070385	Ampd1	protein_coding	3	AMP deaminase 1	30.8852	-3.66303	0.336739	-7.17861	7.04224e-13	1.19476e-11
ENSMUSG00000026414	Tnnt2	protein_coding	1	Troponin T, cardiac muscle	7392.15	-3.65898	0.108619	-33.6578	2.39564e-248	2.3645e-245
ENSMUSG00000001027	Scn4a	protein_coding	11	sodium channel, voltage-gated, type IV, alpha	320.029	-3.65049	0.173528	-20.2112	7.80627e-91	1.12915e-88
ENSMUSG00000031312	Itgb1bp2	protein_coding	X	Integrin beta-1-binding protein 2	997.237	-3.64848	0.1697	-21.3158	8.10566e-101	1.37379e-98
ENSMUSG00000061462	Obscn	protein_coding	11	obscurin, cytoskeletal calmodulin and titin-interacting RhoGEF	831.803	-3.62549	0.184283	-19.5189	7.58611e-85	9.94433e-83
ENSMUSG00000030470	Csrp3	protein_coding	7	Cysteine and glycine-rich protein 3	371.591	-3.62168	0.211853	-16.7113	1.08367e-62	9.99062e-61
ENSMUSG00000038763	Alpk3	protein_coding	7	alpha kinase 3	415.989	-3.62161	0.1597	-22.1031	2.95374e-108	5.63191e-106
ENSMUSG00000026950	Neb	protein_coding	2	nebulin	5266.56	-3.60353	0.235382	-15.2901	8.89518e-53	6.78419e-51
ENSMUSG00000061086	Myl4	protein_coding	11	Mus musculus myosin, light polypeptide 4 (Myl4), transcript variant 2, mRNA.	4504.63	-3.58122	0.175297	-20.3966	1.79329e-92	2.6628e-90
ENSMUSG00000028116	Myoz2	protein_coding	3	Myozenin-2	470.563	-3.56009	0.166223	-20.8788	8.34762e-97	1.30902e-94
ENSMUSG00000027961	Lrrc39	protein_coding	3	Leucine-rich repeat-containing protein 39	140.587	-3.54864	0.21208	-15.2951	8.24041e-53	6.31351e-51
ENSMUSG00000091898	Tnnc1	protein_coding	14	Troponin C, slow skeletal and cardiac muscles	8983.08	-3.53573	0.132822	-26.6053	5.89619e-156	2.01902e-153
ENSMUSG00000026458	Ppfia4	protein_coding	1	protein tyrosine phosphatase, receptor type, f polypeptide (PTPRF), interacting protein (liprin), alpha 4	541.938	-3.51873	0.122794	-28.1014	9.40962e-174	3.67172e-171
ENSMUSG00000026459	Myog	protein_coding	1	Myogenin	9947.31	-3.49416	0.0770944	-45.3009	0	0
ENSMUSG00000040752	Myh6	protein_coding	14	myosin, heavy polypeptide 6, cardiac muscle, alpha	298.302	-3.47872	0.289941	-11.6575	2.10234e-31	9.82595e-30
ENSMUSG00000004939	Nmrk2	protein_coding	10	Nicotinamide riboside kinase 2	107.018	-3.45908	0.223642	-14.4641	2.04119e-47	1.42705e-45
ENSMUSG00000050503	Fbxl22	protein_coding	9	F-box and leucine-rich protein 22	180.777	-3.44099	0.187863	-17.1724	4.27386e-66	4.2183e-64
ENSMUSG00000051456	Hspb3	protein_coding	13	Heat shock protein beta-3	55.7623	-3.44006	0.284452	-10.016	1.29616e-23	4.41142e-22
ENSMUSG00000021765	Fst	protein_coding	13	follistatin FST315	723.955	-3.42274	0.192932	-17.46	2.88721e-68	2.8836e-66
ENSMUSG00000110547	Gm29773	antisense	8	predicted gene, 29773	45.6329	-3.42016	0.313834	-8.20354	2.33406e-16	5.2568e-15
ENSMUSG00000029683	Lmod2	protein_coding	6	Leiomodin-2	472.967	-3.41792	0.140782	-23.8955	3.41132e-126	8.41744e-124
ENSMUSG00000040694	Apobec2	protein_coding	17	apolipoprotein B mRNA editing enzyme, catalytic polypeptide 2	799.058	-3.41265	0.121179	-27.8632	7.45512e-171	2.84294e-168
ENSMUSG00000079588	Tmem182	protein_coding	1	Transmembrane protein 182	929.897	-3.4086	0.114071	-29.649	3.4897e-193	2.01909e-190
ENSMUSG00000056296	Synpr	protein_coding	14	Synaptoporin	15.8837	-3.40755	0.362674	-6.02409	1.70062e-09	2.0223e-08
ENSMUSG00000101746	2310043L19Rik	lincRNA	1	RIKEN cDNA 2310043L19 gene	38.6603	-3.37188	0.308939	-8.5752	9.89141e-18	2.43355e-16
ENSMUSG00000041476	Smpx	protein_coding	X	small muscle protein, X-linked	591.801	-3.36937	0.136681	-24.3395	7.49567e-131	1.9056e-128
ENSMUSG00000064246	Chil1	protein_coding	1	Chitinase-3-like protein 1	49.8082	-3.36856	0.327246	-7.36626	1.75486e-13	3.17978e-12
ENSMUSG00000021565	Slc6a19	protein_coding	13	solute carrier family 6 (neurotransmitter transporter), member 19	25.3907	-3.36586	0.345568	-6.29733	3.02825e-10	3.96342e-09
ENSMUSG00000044086	Lmod3	protein_coding	6	Leiomodin-3	1277.98	-3.36098	0.106604	-31.3707	5.08488e-216	3.28151e-213
ENSMUSG00000074652	Myh7b	protein_coding	2	Myosin-7B	85.0111	-3.35505	0.248614	-12.1843	3.76703e-34	1.92118e-32
ENSMUSG00000055775	Myh8	protein_coding	11	Myosin-8	2310.11	-3.34892	0.261839	-12.7216	4.48523e-37	2.48375e-35
ENSMUSG00000055027	Smyd1	protein_coding	6	SET and MYND domain containing 1	1157.01	-3.34214	0.0947179	-35.0733	1.72136e-269	3.20919e-266
ENSMUSG00000061816	Myl1	protein_coding	1	Myosin light chain 1/3, skeletal muscle isoform	2677.9	-3.3339	0.118351	-28.122	5.26655e-174	2.1553e-171
ENSMUSG00000047230	Cldn2	protein_coding	X	Claudin-2	41.2518	-3.32587	0.290131	-9.77347	1.46358e-22	4.76844e-21
ENSMUSG00000044461	Shisa2	protein_coding	14	shisa family member 2	81.0975	-3.3213	0.263283	-11.3441	7.93259e-30	3.49346e-28
ENSMUSG00000064179	Tnnt1	protein_coding	7	troponin T1, skeletal, slow	3384.64	-3.29735	0.133992	-24.5793	2.10277e-133	5.60038e-131
ENSMUSG00000056643	Chst13	protein_coding	6	carbohydrate (chondroitin 4) sulfotransferase 13	35.2931	-3.29571	0.330998	-7.19175	6.39653e-13	1.09184e-11
ENSMUSG00000023336	Wfdc1	protein_coding	8	WAP four-disulfide core domain 1	34.1072	-3.28208	0.33173	-7.48802	6.99226e-14	1.31528e-12
ENSMUSG00000032503	Arpp21	protein_coding	9	cAMP-regulated phosphoprotein 21	331.987	-3.27199	0.15718	-20.2647	2.63769e-91	3.84851e-89
ENSMUSG00000041731	Pgm5	protein_coding	19	Phosphoglucomutase-like protein 5	552.386	-3.25438	0.223467	-14.258	3.9998e-46	2.68451e-44
ENSMUSG00000049436	Upk1b	protein_coding	16	uroplakin 1B	38.2656	-3.25355	0.331242	-7.00425	2.48311e-12	4.01389e-11
ENSMUSG00000044951	Mylk4	protein_coding	13	myosin light chain kinase family member 4	50.1025	-3.2439	0.317302	-7.62663	2.40978e-14	4.71255e-13
ENSMUSG00000038663	Fsd2	protein_coding	7	fibronectin type III and SPRY domain containing 2	40.2612	-3.23051	0.323967	-8.07419	6.79286e-16	1.47258e-14
ENSMUSG00000028950	Tas1r1	protein_coding	4	taste receptor, type 1, member 1	84.7311	-3.22483	0.26911	-10.655	1.65173e-26	6.4452e-25
ENSMUSG00000020182	Ddc	protein_coding	11	Aromatic-L-amino-acid decarboxylase	144.588	-3.21566	0.181373	-17.0075	7.22211e-65	7.00462e-63
ENSMUSG00000031022	BC051019	protein_coding	7	Uncharacterized	122.121	-3.20594	0.238229	-12.4877	8.71476e-36	4.70177e-34
ENSMUSG00000034687	Fras1	protein_coding	5	Extracellular matrix protein FRAS1	46.7061	-3.17467	0.314248	-8.07285	6.86769e-16	1.48688e-14
ENSMUSG00000036040	Adamtsl2	protein_coding	2	ADAMTS-like protein 2	100.832	-3.17322	0.288732	-9.40998	4.96225e-21	1.47366e-19
ENSMUSG00000033196	Myh2	protein_coding	11	myosin heavy chain 2	75.7088	-3.16364	0.293616	-9.70563	2.85316e-22	9.01567e-21
ENSMUSG00000020333	Acsl6	protein_coding	11	Long-chain-fatty-acid--CoA ligase 6	161.566	-3.12686	0.202626	-14.7446	3.33199e-49	2.4098e-47
ENSMUSG00000038132	Rbm24	protein_coding	13	RNA-binding protein 24	1512.54	-3.10815	0.0911727	-33.9887	3.27369e-253	3.66194e-250
ENSMUSG00000074892	B3galt5	protein_coding	16	Mus musculus UDP-Gal:betaGlcNAc beta 1,3-galactosyltransferase, polypeptide 5 (B3galt5), transcript variant 4, mRNA.	88.1939	-3.10782	0.243546	-11.4945	1.40664e-30	6.36174e-29
ENSMUSG00000026228	Htr2b	protein_coding	1	5-hydroxytryptamine (serotonin) receptor 2B	40.9157	-3.10209	0.309308	-8.29198	1.11378e-16	2.58122e-15
ENSMUSG00000030064	Frmd4b	protein_coding	6	Mus musculus FERM domain containing 4B (Frmd4b), transcript variant 2, mRNA.	53.4881	-3.09953	0.284732	-9.6372	5.56839e-22	1.72384e-20
ENSMUSG00000001763	Tspan33	protein_coding	6	Tetraspanin-33	86.0961	-3.09395	0.230146	-12.3026	8.77075e-35	4.57032e-33
ENSMUSG00000026828	Galnt5	protein_coding	2	Polypeptide N-acetylgalactosaminyltransferase 5	25.1917	-3.08923	0.348013	-6.84384	7.70983e-12	1.18356e-10
ENSMUSG00000008461	Fut1	protein_coding	7	fucosyltransferase 1 (H blood group)	20.3756	-3.08738	0.356803	-5.3484	8.87368e-08	8.37409e-07
ENSMUSG00000113178	Mylf-ps	processed_pseudogene	12	myosin light chain, alkali, fast skeletal muscle, pseudogene	79.8061	-3.08052	0.252831	-11.2408	2.56919e-29	1.11104e-27
ENSMUSG00000020067	Mypn	protein_coding	10	Myopalladin	48.7955	-3.06903	0.306529	-8.31101	9.48878e-17	2.20822e-15
ENSMUSG00000079471	Mymx	protein_coding	17	Protein myomixer	692.467	-3.0688	0.129977	-23.3917	5.19721e-121	1.16272e-118
ENSMUSG00000006362	Cbfa2t3	protein_coding	8	Protein CBFA2T3	29.6337	-3.06306	0.324859	-7.33805	2.16727e-13	3.86806e-12
ENSMUSG00000031098	Syt8	protein_coding	7	synaptotagmin VIII	34.3873	-3.02685	0.327834	-7.40688	1.29305e-13	2.36857e-12
ENSMUSG00000079243	Xirp1	protein_coding	9	xin actin-binding repeat containing 1	289.554	-3.02251	0.166326	-17.6982	4.32888e-70	4.40208e-68
ENSMUSG00000021373	Cap2	protein_coding	13	Adenylyl cyclase-associated protein 2	916.277	-3.0173	0.138365	-21.713	1.54562e-104	2.75894e-102
ENSMUSG00000019787	Trdn	protein_coding	10	Triadin	167.702	-3.01554	0.169985	-17.1931	2.99281e-66	2.97138e-64
ENSMUSG00000008658	Rbfox1	protein_coding	16	RNA binding 1	49.8737	-3.00754	0.282917	-9.39405	5.77373e-21	1.71162e-19
ENSMUSG00000056328	Myh1	protein_coding	11	Myosin-1	2500.54	-2.99849	0.209513	-14.2863	2.66309e-46	1.80907e-44
ENSMUSG00000067653	Ankrd23	protein_coding	1	Ankyrin repeat domain-containing protein 23	32.9679	-2.99842	0.323338	-7.70256	1.33365e-14	2.65764e-13
ENSMUSG00000021200	Asb2	protein_coding	12	Ankyrin repeat and SOCS box protein 2	130.296	-2.95283	0.20427	-13.6064	3.67005e-42	2.26396e-40
ENSMUSG00000034898	Filip1	protein_coding	9	Mus musculus filamin A interacting protein 1 (Filip1), transcript variant 3, mRNA.	421.451	-2.95029	0.149452	-19.4793	1.64636e-84	2.12494e-82
ENSMUSG00000037318	Traf3ip3	protein_coding	1	TRAF3 interacting protein 3	40.6803	-2.94528	0.312202	-7.70086	1.35148e-14	2.68998e-13
ENSMUSG00000051043	Gprc5c	protein_coding	11	G protein-coupled receptor, family C, group 5, member C	1393.25	-2.93948	0.0993448	-29.4955	3.2889e-191	1.72451e-188
ENSMUSG00000067642	Adgrf3	protein_coding	5	Adhesion G-protein coupled receptor F3	16.1641	-2.93284	0.369302	-5.06723	4.03651e-07	3.43277e-06
ENSMUSG00000042895	Abra	protein_coding	15	actin-binding Rho activating protein	259.058	-2.93247	0.2038	-13.9336	3.96039e-44	2.53631e-42
ENSMUSG00000000889	Dbh	protein_coding	2	Dopamine beta-hydroxylase Soluble dopamine beta-hydroxylase	14.8989	-2.92595	0.357063	-6.20364	5.51728e-10	7.01322e-09
ENSMUSG00000028927	Padi2	protein_coding	4	Protein-arginine deiminase type-2	74.4642	-2.9194	0.266923	-9.83996	7.57415e-23	2.5116e-21
ENSMUSG00000072945	Ripply1	protein_coding	X	Protein ripply1	29.2479	-2.9194	0.33191	-7.25957	3.88327e-13	6.75207e-12
ENSMUSG00000020061	Mybpc1	protein_coding	10	myosin binding protein C, slow type	143.609	-2.9051	0.237231	-11.4682	1.90475e-30	8.54542e-29
ENSMUSG00000050592	Fam78a	protein_coding	2	Protein FAM78A	30.464	-2.89337	0.349651	-5.64323	1.66891e-08	1.74798e-07
ENSMUSG00000030785	Cox6a2	protein_coding	7	Cytochrome c oxidase subunit 6A2, mitochondrial	80.3444	-2.89307	0.262746	-9.94354	2.69085e-23	9.06623e-22
ENSMUSG00000044716	Dok7	protein_coding	5	Mus musculus docking protein 7 (Dok7), transcript variant 4, mRNA.	423.523	-2.88502	0.149433	-19.054	6.09004e-81	7.51359e-79
ENSMUSG00000027249	F2	protein_coding	2	Prothrombin Activation peptide fragment 1 Activation peptide fragment 2 Thrombin light chain Thrombin heavy chain	50.0652	-2.88254	0.297603	-8.37098	5.71396e-17	1.34278e-15
ENSMUSG00000054034	Tceal5	protein_coding	X	transcription elongation factor A (SII)-like 5	17.3531	-2.87643	0.357039	-6.06376	1.32973e-09	1.60169e-08
ENSMUSG00000013936	Myl2	protein_coding	5	Myosin regulatory light chain 2, ventricular/cardiac muscle isoform	64.273	-2.85854	0.343134	-7.07737	1.46914e-12	2.43585e-11
ENSMUSG00000007097	Atp1a2	protein_coding	1	Sodium/potassium-transporting ATPase subunit alpha-2	575.322	-2.85381	0.159921	-17.7235	2.76415e-70	2.84538e-68
ENSMUSG00000033849	B3galt2	protein_coding	1	Beta-1,3-galactosyltransferase 2	24.2903	-2.84154	0.335417	-7.24716	4.25603e-13	7.36206e-12
ENSMUSG00000037418	Best1	protein_coding	19	Bestrophin-1	47.3773	-2.8309	0.299003	-8.12972	4.30301e-16	9.45028e-15
ENSMUSG00000030249	Abcc9	protein_coding	6	ATP-binding cassette, sub-family C (CFTR/MRP), member 9	39.5538	-2.80842	0.296115	-8.22971	1.87665e-16	4.26093e-15
ENSMUSG00000023078	Cxcl13	protein_coding	5	C-X-C motif chemokine 13	11.9803	-2.80786	0.382478	-5.296	1.18366e-07	1.09849e-06
ENSMUSG00000031791	Tmem38a	protein_coding	8	transmembrane protein 38A	2084.11	-2.7979	0.0802954	-34.7919	3.22639e-265	5.41355e-262
ENSMUSG00000078815	Cacng6	protein_coding	7	Voltage-dependent calcium channel gamma-6 subunit	25.3641	-2.79225	0.338032	-6.62284	3.52373e-11	5.09695e-10
ENSMUSG00000108322	5430431A17Rik	lincRNA	7	RIKEN cDNA 5430431A17 gene	19.7475	-2.78746	0.355174	-5.83298	5.4447e-09	6.07021e-08
ENSMUSG00000062077	Trim54	protein_coding	5	Tripartite motif-containing protein 54	463.053	-2.78505	0.126475	-21.8151	1.66844e-105	3.04291e-103
ENSMUSG00000062694	Cav3	protein_coding	6	Caveolin-3	429.132	-2.7846	0.215772	-12.7446	3.34251e-37	1.86326e-35
ENSMUSG00000026253	Chrng	protein_coding	1	cholinergic receptor, nicotinic, gamma polypeptide	2008.95	-2.78283	0.0826209	-33.6307	5.9649e-248	5.26763e-245
ENSMUSG00000015093	Clic3	protein_coding	2	Chloride intracellular channel protein 3	38.0912	-2.77785	0.301943	-8.12459	4.4888e-16	9.81977e-15
ENSMUSG00000052852	Reep1	protein_coding	6	Receptor expression-enhancing protein 1	266.357	-2.76466	0.168267	-16.0811	3.46128e-58	2.90384e-56
ENSMUSG00000000392	Fap	protein_coding	2	Prolyl endopeptidase FAP Antiplasmin-cleaving enzyme FAP, soluble form	46.6618	-2.76154	0.268188	-9.5239	1.66798e-21	5.06096e-20
ENSMUSG00000039824	Myl6b	protein_coding	10	Myosin light chain 6B	232.094	-2.75755	0.166149	-16.3057	8.98724e-60	7.854e-58
ENSMUSG00000085779	Atcayos	antisense	10	ataxia, cerebellar, Cayman type, opposite strand	28.6539	-2.7491	0.314867	-7.47774	7.56097e-14	1.41591e-12
ENSMUSG00000028977	Casz1	protein_coding	4	Zinc finger 1	53.3054	-2.74834	0.278968	-8.9216	4.59592e-19	1.22794e-17
ENSMUSG00000007877	Tcap	protein_coding	11	titin-cap	65.3307	-2.74556	0.286139	-8.84088	9.49651e-19	2.4781e-17
ENSMUSG00000075420	Smim6	protein_coding	11		11.8035	-2.72612	0.389361	-4.76883	1.85303e-06	1.42755e-05
ENSMUSG00000022382	Wnt7b	protein_coding	15	wingless-type MMTV integration site family, member 7B	34.9676	-2.70036	0.305402	-7.50991	5.91694e-14	1.12308e-12
ENSMUSG00000021815	Mss51	protein_coding	14	Putative , mitochondrial	93.7144	-2.69446	0.19116	-13.5914	4.50543e-42	2.76911e-40
ENSMUSG00000025488	Cox8b	protein_coding	7	Cytochrome c oxidase subunit 8B, mitochondrial	57.1613	-2.68935	0.288538	-8.45798	2.72045e-17	6.53024e-16
ENSMUSG00000040287	Stac3	protein_coding	10	SH3 and cysteine-rich domain-containing protein 3	712.146	-2.6789	0.0902624	-29.5367	9.72865e-192	5.26571e-189
ENSMUSG00000027546	Atp9a	protein_coding	2	Mus musculus ATPase, class II, type 9A (Atp9a), transcript variant 4, mRNA.	193.079	-2.65938	0.160698	-16.192	5.74364e-59	4.94218e-57
ENSMUSG00000054446	Cpa1	protein_coding	6	Carboxypeptidase A1	14.3265	-2.65447	0.379719	-5.50628	3.66495e-08	3.65819e-07
ENSMUSG00000031936	Hephl1	protein_coding	9	Hephaestin-like protein 1	115.872	-2.63807	0.245258	-10.132	3.98605e-24	1.39048e-22
ENSMUSG00000030592	Ryr1	protein_coding	7	Ryanodine receptor 1	2096.72	-2.63773	0.149822	-17.5916	2.85948e-69	2.873e-67
ENSMUSG00000018166	Erbb3	protein_coding	10	Receptor tyrosine-protein kinase erbB-3	2449.12	-2.62781	0.0809095	-32.4481	5.76164e-231	4.60355e-228
ENSMUSG00000074001	Klhl40	protein_coding	9	kelch like family member 40	494.873	-2.5869	0.126327	-20.2918	1.5183e-91	2.2347e-89
ENSMUSG00000041886	Macc1	protein_coding	12	MACC1, MET transcriptional regulator	88.967	-2.58563	0.217108	-11.4591	2.11713e-30	9.47289e-29
ENSMUSG00000032053	Pou2af1	protein_coding	9	POU domain, class 2, associating factor 1	7.13707	-2.54465	0.399234	-5.09736	3.44424e-07	2.95908e-06
ENSMUSG00000035296	Sgcg	protein_coding	14	sarcoglycan, gamma (dystrophin-associated glycoprotein)	1055.07	-2.51842	0.100685	-24.9564	1.81953e-137	5.17456e-135
ENSMUSG00000027794	Sohlh2	protein_coding	3	Spermatosis- and oosis-specific basic helix-loop-helix-containing protein 2	23.1323	-2.50286	0.34958	-5.93949	2.85907e-09	3.30616e-08
ENSMUSG00000044938	Klhl31	protein_coding	9	kelch like family member 31	542.919	-2.48224	0.117169	-21.0945	8.9342e-99	1.45541e-96
ENSMUSG00000092397	C130080G10Rik	antisense	2	RIKEN cDNA C130080G10 gene	34.2128	-2.48153	0.350704	-5.87786	4.15612e-09	4.70233e-08
ENSMUSG00000075225	Ccdc162	protein_coding	10	Mus musculus coiled-coil domain containing 162 (Ccdc162), mRNA.	161.48	-2.47306	0.16179	-15.0333	4.44591e-51	3.27184e-49
ENSMUSG00000042961	Egflam	protein_coding	15	Pikachurin	11.7507	-2.47227	0.378535	-4.52867	5.93566e-06	4.18816e-05
ENSMUSG00000057948	Unc13d	protein_coding	11	unc-13 homolog D (C. elegans)	285.561	-2.4536	0.137485	-17.6546	9.38105e-70	9.48221e-68
ENSMUSG00000022157	Mcpt8	protein_coding	14	Mast cell protease 8	159.292	-2.44987	0.161953	-14.8752	4.77741e-50	3.50044e-48
ENSMUSG00000052353	Cemip	protein_coding	7	Cell migration-inducing and hyaluronan-binding protein	283.324	-2.43375	0.203469	-11.8401	2.42183e-32	1.16103e-30
ENSMUSG00000057378	Ryr3	protein_coding	2	Ryanodine receptor 3	505.197	-2.42793	0.122537	-19.7371	1.03637e-86	1.41376e-84
ENSMUSG00000032322	Pstpip1	protein_coding	9	proline-serine-threonine phosphatase interacting protein 1	57.5474	-2.41661	0.286486	-7.89366	2.93453e-15	6.16251e-14
ENSMUSG00000051373	Plpp7	protein_coding	2	Inactive phospholipid phosphatase 7	237.287	-2.41104	0.144073	-16.5079	3.21831e-61	2.90322e-59
ENSMUSG00000039376	Synpo2l	protein_coding	14	synaptopodin 2-like	562.524	-2.40549	0.107185	-22.339	1.54531e-110	2.98031e-108
ENSMUSG00000032744	Heyl	protein_coding	4	Hairy/enhancer-of-split related with YRPW motif-like protein	229.045	-2.4017	0.143701	-16.5254	2.40871e-61	2.18464e-59
ENSMUSG00000043251	Exoc3l	protein_coding	8	Mus musculus exocyst complex component 3-like (Exoc3l), transcript variant 2, mRNA.	156.96	-2.3897	0.174126	-13.3754	8.4189e-41	5.02707e-39
ENSMUSG00000007122	Casq1	protein_coding	1	Calsequestrin-1	249.114	-2.38675	0.224729	-10.5057	8.12767e-26	3.10647e-24
ENSMUSG00000024810	Il33	protein_coding	19	Interleukin-33 Interleukin-33(102-266) Interleukin-33(109-266)	509.518	-2.37953	0.0811855	-29.2013	1.86721e-187	8.95143e-185
ENSMUSG00000012123	Crybg2	protein_coding	4	crystallin beta-gamma domain containing 2	14.3198	-2.37849	0.362765	-5.44063	5.30912e-08	5.21251e-07
ENSMUSG00000032401	Lctl	protein_coding	9	Lactase-like protein	29.4151	-2.37625	0.30861	-7.00534	2.46392e-12	3.99056e-11
ENSMUSG00000034768	Asb16	protein_coding	11	Ankyrin repeat and SOCS box protein 16	18.1719	-2.36732	0.361143	-5.1108	3.20805e-07	2.76991e-06
ENSMUSG00000066392	Nrxn3	protein_coding	12	Neurexin-3	32.7707	-2.36402	0.278811	-7.93938	2.03202e-15	4.32134e-14
ENSMUSG00000022227	Mcpt1	protein_coding	14	Mast cell protease 1	10.8507	-2.34114	0.365109	-5.57421	2.4866e-08	2.53942e-07
ENSMUSG00000020577	Tspan13	protein_coding	12	Tetraspanin-13	91.2906	-2.33446	0.2189	-10.3401	4.63856e-25	1.69196e-23
ENSMUSG00000039179	Tekt5	protein_coding	16	Tektin-5	48.7859	-2.3331	0.34026	-5.85961	4.63948e-09	5.21405e-08
ENSMUSG00000086219	Srrm4os	antisense	5	serine/arginine repetitive matrix 4, opposite strand	16.6838	-2.33126	0.35793	-5.6374	1.72639e-08	1.8048e-07
ENSMUSG00000094613	A630076J17Rik	protein_coding	3	RIKEN cDNA A630076J17 gene	7.96017	-2.32852	0.395057	-4.33063	1.48681e-05	9.69575e-05
ENSMUSG00000028328	Tmod1	protein_coding	4	Tropomodulin-1	646.646	-2.32473	0.089653	-25.8526	2.27709e-147	7.20892e-145
ENSMUSG00000020566	Atp6v1c2	protein_coding	12	ATPase, H+ transporting, lysosomal V1 subunit C2	61.7933	-2.30729	0.346495	-5.69157	1.25876e-08	1.34271e-07
ENSMUSG00000034438	Gbp8	protein_coding	5		4.90872	-2.30728	0.407135	-4.15678	3.22769e-05	0.000196983
ENSMUSG00000000244	Tspan32	protein_coding	7	tetraspanin 32	147.941	-2.30417	0.183792	-12.3375	5.6902e-35	2.97433e-33
ENSMUSG00000005583	Mef2c	protein_coding	13	Mus musculus myocyte enhancer factor 2C (Mef2c), transcript variant 14, mRNA.	506.216	-2.30252	0.186952	-12.2678	1.34867e-34	6.96286e-33
ENSMUSG00000027009	Itga4	protein_coding	2	integrin subunit alpha 4	204.559	-2.29205	0.133136	-17.0575	3.07416e-65	2.99891e-63
ENSMUSG00000057003	Myh4	protein_coding	11	Myosin-4	646.962	-2.2897	0.243753	-9.34571	9.12717e-21	2.67268e-19
ENSMUSG00000048373	Fgfbp1	protein_coding	5	Fibroblast growth factor-binding protein 1	78.4383	-2.28684	0.238934	-9.22522	2.82981e-20	8.08884e-19
ENSMUSG00000112854	Gm38403	lincRNA	10	predicted gene, 38403	106.025	-2.27738	0.213168	-10.4359	1.69929e-25	6.3072e-24
ENSMUSG00000051747	Ttn	protein_coding	2	titin	31069.7	-2.27381	0.216978	-10.4816	1.04998e-25	3.98589e-24
ENSMUSG00000108634	Gm38534	lincRNA	11	predicted gene, 38534	47.0308	-2.27288	0.290605	-7.25146	4.12297e-13	7.14662e-12
ENSMUSG00000003134	Tbc1d8	protein_coding	1	Mus musculus TBC1 domain family, member 8 (Tbc1d8), transcript variant 3, mRNA.	279.404	-2.26352	0.145266	-15.4292	1.04145e-53	8.09007e-52
ENSMUSG00000032495	Lrrc2	protein_coding	9	leucine rich repeat containing 2	20.1759	-2.25543	0.33269	-6.03596	1.58023e-09	1.88582e-08
ENSMUSG00000045659	Plekha7	protein_coding	7	Pleckstrin homology domain-containing family A member 7	118.021	-2.24832	0.189898	-11.5299	9.3254e-31	4.2404e-29
ENSMUSG00000020905	Usp43	protein_coding	11	ubiquitin specific peptidase 43	24.6533	-2.24815	0.322807	-6.29494	3.07515e-10	4.01853e-09
ENSMUSG00000038259	Gdf5	protein_coding	2	Growth/differentiation factor 5	36.8196	-2.23897	0.340728	-5.77689	7.60945e-09	8.29084e-08
ENSMUSG00000045281	Gpr20	protein_coding	15	G-protein coupled receptor 20	62.2833	-2.23802	0.269569	-7.84973	4.16919e-15	8.65777e-14
ENSMUSG00000099364	5730419F03Rik	lincRNA	1	RIKEN cDNA 5730419F03 gene	16.3089	-2.22917	0.346223	-5.62976	1.80461e-08	1.88188e-07
ENSMUSG00000000792	Slc5a5	protein_coding	8	solute carrier family 5 member 5	10.4425	-2.21935	0.385393	-4.46314	8.07682e-06	5.55414e-05
ENSMUSG00000038807	Rap1gap2	protein_coding	11	Rap1 GTPase-activating protein 2	1311.06	-2.20447	0.0979172	-22.4865	5.62082e-112	1.15014e-109
ENSMUSG00000039891	Txlnb	protein_coding	10	taxilin beta	286.008	-2.20347	0.138104	-15.8472	1.47024e-56	1.18602e-54
ENSMUSG00000059336	Slc14a1	protein_coding	18	Urea transporter 1	62.8114	-2.20335	0.218707	-9.72871	2.27455e-22	7.28333e-21
ENSMUSG00000096215	Smim22	protein_coding	16	small integral membrane protein 22	6.78714	-2.20259	0.400534	-3.91571	9.01378e-05	0.000504646
ENSMUSG00000109125	Gm45159	lincRNA	7	predicted gene 45159	9.57014	-2.1999	0.38982	-4.2007	2.66091e-05	0.000165361
ENSMUSG00000031461	Myom2	protein_coding	8	myomesin 2	5783.3	-2.18236	0.0852325	-25.6004	1.50886e-144	4.60313e-142
ENSMUSG00000090157	Gm16534	processed_transcript	2	predicted gene 16534	13.5031	-2.16286	0.389327	-4.89898	9.63337e-07	7.72281e-06
ENSMUSG00000068227	Il2rb	protein_coding	15	Interleukin-2 receptor subunit beta	23.2704	-2.15806	0.299932	-6.66856	2.58319e-11	3.76899e-10
ENSMUSG00000020340	Cyfip2	protein_coding	11	Cytoplasmic FMR1-interacting protein 2	28.7296	-2.15193	0.308881	-6.53963	6.16722e-11	8.7031e-10
ENSMUSG00000114590	5930438M14Rik	lincRNA	13	RIKEN cDNA 5930438M14 gene	17.7502	-2.1367	0.379504	-4.54272	5.55319e-06	3.93318e-05
ENSMUSG00000109962	1700025L06Rik	lincRNA	7	RIKEN cDNA 1700025L06 gene	20.8805	-2.12245	0.329271	-5.90459	3.53514e-09	4.03511e-08
ENSMUSG00000079330	Lemd1	protein_coding	1	LEM domain-containing protein 1	11.3468	-2.12172	0.382418	-4.36409	1.2765e-05	8.41258e-05
ENSMUSG00000030098	Grip2	protein_coding	6	glutamate receptor interacting protein 2	13.3971	-2.11973	0.382766	-4.06391	4.82576e-05	0.000285613
ENSMUSG00000024210	Ip6k3	protein_coding	17	Inositol hexakisphosphate kinase 3	202.063	-2.10735	0.146378	-14.2432	4.94467e-46	3.29232e-44
ENSMUSG00000002944	Cd36	protein_coding	5	Platelet glycoprotein 4	256.29	-2.10616	0.228428	-9.16341	5.02826e-20	1.41322e-18
ENSMUSG00000095438	Mir133a-1hg	antisense	18	Mir133a-1, Mir1b and Mir1a-2 host gene	5.61237	-2.09764	0.405739	-4.59664	4.29351e-06	3.10387e-05
ENSMUSG00000028631	Kcnq4	protein_coding	4	Potassium voltage-gated channel subfamily KQT member 4	379.722	-2.09595	0.116488	-17.8967	1.25144e-71	1.31237e-69
ENSMUSG00000035861	Tmprss11b	protein_coding	5	Transmembrane protease serine 11B-like protein	41.631	-2.09535	0.257745	-7.84194	4.4365e-15	9.19013e-14
ENSMUSG00000001622	Csn3	protein_coding	5	casein kappa	10.4913	-2.09092	0.380072	-4.51391	6.36432e-06	4.46434e-05
ENSMUSG00000114425	Gm33447	lincRNA	13	predicted gene, 33447	8.05576	-2.09078	0.40228	-4.65879	3.1807e-06	2.35624e-05
ENSMUSG00000060429	Sntb1	protein_coding	15	Beta-1-syntrophin	1763.09	-2.08981	0.0673353	-31.0122	3.69331e-211	2.21322e-208
ENSMUSG00000030353	Tead4	protein_coding	6	TEA domain family member 4	725.739	-2.0868	0.100568	-20.7068	3.00981e-95	4.59105e-93
ENSMUSG00000113535	AU015791	lincRNA	12	expressed sequence AU015791	8.06631	-2.08476	0.391149	-4.54044	5.61377e-06	3.97105e-05
ENSMUSG00000033032	Afap1l1	protein_coding	18	Actin filament-associated protein 1-like 1	183.104	-2.07979	0.187054	-10.9654	5.60787e-28	2.29499e-26
ENSMUSG00000035615	Frmpd1	protein_coding	4	FERM and PDZ domain-containing protein 1	299.351	-2.07287	0.127477	-16.1475	1.18322e-58	1.00269e-56
ENSMUSG00000070424	Art5	protein_coding	7	ADP-ribosyltransferase 5	24.4346	-2.07209	0.360432	-5.04856	4.45163e-07	3.75056e-06
ENSMUSG00000029158	Yipf7	protein_coding	5	Yip1 domain family, member 7	14.3921	-2.06571	0.36947	-4.8522	1.22101e-06	9.66383e-06
ENSMUSG00000087090	Nctc1	processed_transcript	7	non-coding transcript 1	8.09419	-2.0629	0.400286	-3.98513	6.74426e-05	0.000387143
ENSMUSG00000030091	Nup210	protein_coding	6	Nuclear pore membrane glycoprotein 210	19.3129	-2.06189	0.364764	-4.93686	7.93892e-07	6.46951e-06
ENSMUSG00000033770	Clcnka	protein_coding	4	Chloride channel protein ClC-Ka	24.9672	-2.06182	0.372095	-4.4028	1.06864e-05	7.16654e-05
ENSMUSG00000056271	Lman1l	protein_coding	9	Protein ERGIC-53-like	83.0499	-2.04123	0.185909	-10.8174	2.84797e-27	1.13776e-25
ENSMUSG00000026971	Itgb6	protein_coding	2	Integrin beta-6	489.336	-2.0376	0.106025	-19.16	7.98841e-82	1.00028e-79
ENSMUSG00000031169	Porcn	protein_coding	X	Protein-serine O-palmitoleoyltransferase porcupine	567.229	-2.03356	0.108913	-18.6279	1.90705e-77	2.16206e-75
ENSMUSG00000064147	Rab44	protein_coding	17	Ras-related protein Rab-44	62.8071	-2.02934	0.239383	-8.18418	2.74154e-16	6.14157e-15
ENSMUSG00000036855	Gjd4	protein_coding	18	gap junction protein, delta 4	12.3584	-2.02519	0.398111	-4.05094	5.10113e-05	0.000300294
ENSMUSG00000025129	Ppp1r27	protein_coding	11	Protein phosphatase 1 regulatory subunit 27	7.53314	-2.02332	0.381449	-4.60749	4.07558e-06	2.96164e-05
ENSMUSG00000106296	4632404M16Rik	sense_intronic	3	RIKEN cDNA 4632404M16 gene	8.31142	-2.01367	0.388446	-4.19647	2.71108e-05	0.000168043
ENSMUSG00000048981	Krt31	protein_coding	11	Keratin, type I cuticular Ha1	8.55859	-2.01352	0.397207	-4.69881	2.61677e-06	1.96363e-05
ENSMUSG00000033207	Mamdc2	protein_coding	19	MAM domain containing 2	728.947	-2.01315	0.0814488	-24.6708	2.20381e-134	5.96416e-132
ENSMUSG00000027797	Dclk1	protein_coding	3	Mus musculus doublecortin-like kinase 1 (Dclk1), transcript variant 12, mRNA.	7377.69	-2.00963	0.0807209	-24.8931	8.82936e-137	2.42865e-134
ENSMUSG00000027559	Car3	protein_coding	3	Carbonic anhydrase 3	1121.98	-2.00867	0.0581866	-34.4853	1.33172e-260	2.03135e-257
ENSMUSG00000073535	Gm5532	lincRNA	1		16.529	-2.00644	0.380718	-4.51853	6.22716e-06	4.37911e-05
ENSMUSG00000042918	Mamstr	protein_coding	7	MEF2-activating motif and SAP domain-containing transcriptional regulator	43.519	-2.00101	0.246987	-7.8644	3.7086e-15	7.72041e-14
ENSMUSG00000031970	Dbndd1	protein_coding	8		122.818	-2.00042	0.175221	-11.2287	2.94856e-29	1.27161e-27
ENSMUSG00000028825	Rhd	protein_coding	4		8.82336	-1.99907	0.391745	-4.31254	1.6139e-05	0.000104716
ENSMUSG00000045404	Kcnk13	protein_coding	12	Potassium channel subfamily K member 13	28.405	-1.99665	0.351124	-4.98623	6.15688e-07	5.08487e-06
ENSMUSG00000026100	Mstn	protein_coding	1	myostatin	8.99645	-1.99058	0.362828	-4.90686	9.2548e-07	7.44065e-06
ENSMUSG00000055489	Ano5	protein_coding	7	Anoctamin-5	1733.54	-1.99008	0.063008	-31.5664	1.06696e-218	7.16099e-216
ENSMUSG00000035458	Tnni3	protein_coding	7	troponin I, cardiac 3	30.3131	-1.98479	0.273112	-6.95941	3.41696e-12	5.42928e-11
ENSMUSG00000080850	Gm12439	processed_pseudogene	4	predicted gene 12439	77.7699	-1.98351	0.202512	-9.61098	7.1863e-22	2.20035e-20
ENSMUSG00000097756	A730056A06Rik	antisense	7	RIKEN cDNA A730056A06 gene	16.1753	-1.96973	0.375028	-4.0716	4.66905e-05	0.000277022
ENSMUSG00000026069	Il1rl1	protein_coding	1	Interleukin-1 receptor-like 1	37.3242	-1.95966	0.262803	-7.1798	6.98138e-13	1.18563e-11
ENSMUSG00000057123	Gja5	protein_coding	3	gap junction protein, alpha 5	41.285	-1.95352	0.324748	-5.69233	1.25316e-08	1.33871e-07
ENSMUSG00000040569	Slc26a7	protein_coding	4	Anion exchange transporter	25.7725	-1.95227	0.336034	-5.32651	1.00116e-07	9.37417e-07
ENSMUSG00000031790	Mmp15	protein_coding	8	Matrix metalloproteinase-15	437.626	-1.95182	0.108027	-18.0072	1.71079e-72	1.8168e-70
ENSMUSG00000022803	Popdc2	protein_coding	16	Popeye domain-containing protein 2	34.4024	-1.94599	0.31999	-5.7316	9.94853e-09	1.07256e-07
ENSMUSG00000029700	Slc13a1	protein_coding	6	Solute carrier family 13 member 1	7.30219	-1.94558	0.397863	-3.95984	7.49998e-05	0.000426952
ENSMUSG00000020872	Tac4	protein_coding	11	Tachykinin-4 Hemokinin	6.17059	-1.93329	0.404877	-3.8602	0.000113294	0.000619206
ENSMUSG00000067889	Sptbn2	protein_coding	19	spectrin beta, non-erythrocytic 2	76.2072	-1.92249	0.210554	-8.97961	2.71724e-19	7.36553e-18
ENSMUSG00000006457	Actn3	protein_coding	19	Alpha-actinin-3	7705.15	-1.92201	0.0678016	-28.3455	9.51783e-177	4.09486e-174
ENSMUSG00000029204	Rhoh	protein_coding	5	ras homolog family member H	7.79115	-1.91835	0.396529	-3.91047	9.21159e-05	0.000514347
ENSMUSG00000063529	Stmnd1	protein_coding	13	Stathmin domain-containing protein 1	20.282	-1.90734	0.32027	-5.60003	2.14313e-08	2.20611e-07
ENSMUSG00000049420	Tmem200a	protein_coding	10	transmembrane protein 200A	73.4165	-1.90468	0.240008	-7.71738	1.18744e-14	2.37474e-13
ENSMUSG00000030433	Sbk2	protein_coding	7	Serine/threonine-protein kinase SBK2	27.3111	-1.90253	0.296354	-6.09071	1.12411e-09	1.37374e-08
ENSMUSG00000107585	3300002P13Rik	lincRNA	7	RIKEN cDNA 3300002P13 gene	5.89554	-1.89254	0.407259	-3.79081	0.000150157	0.000799328
ENSMUSG00000026251	Chrnd	protein_coding	1	cholinergic receptor, nicotinic, delta polypeptide	1552.03	-1.89043	0.0774342	-24.4011	1.66449e-131	4.29668e-129
ENSMUSG00000040706	Agmat	protein_coding	4	Agmatinase, mitochondrial	18.4135	-1.88957	0.34841	-5.00155	5.6872e-07	4.72404e-06
ENSMUSG00000086866	4930512H18Rik	antisense	8	RIKEN cDNA 4930512H18 gene	14.8089	-1.88779	0.3645	-4.58727	4.49086e-06	3.23122e-05
ENSMUSG00000022156	Gzme	protein_coding	14	Granzyme E	94.9347	-1.87932	0.167806	-11.0582	2.00168e-28	8.33406e-27
ENSMUSG00000029309	Sparcl1	protein_coding	5	SPARC-like protein 1	29.5604	-1.87175	0.297779	-6.00691	1.89088e-09	2.23903e-08
ENSMUSG00000034990	Otoa	protein_coding	7	Otoancorin	20.5855	-1.8705	0.320521	-5.46467	4.63768e-08	4.58278e-07
ENSMUSG00000026564	Dusp27	protein_coding	1	Inactive dual specificity phosphatase 27	1639.51	-1.87028	0.0798522	-23.4101	3.37509e-121	7.6528e-119
ENSMUSG00000034212	Ankmy1	protein_coding	1	Mus musculus ankyrin repeat and MYND domain containing 1 (Ankmy1), transcript variant 2, mRNA.	13.6699	-1.86082	0.372511	-4.36677	1.26096e-05	8.31339e-05
ENSMUSG00000022766	Serpind1	protein_coding	16	serine (or cysteine) peptidase inhibitor, clade D, member 1	11.1833	-1.85834	0.385624	-4.21871	2.45699e-05	0.000153771
ENSMUSG00000084940	Gm15935	antisense	14	predicted gene 15935	4.7909	-1.8574	0.407467	-3.5245	0.000424289	0.00202594
ENSMUSG00000072720	Myo18b	protein_coding	5	myosin XVIIIB	45.0321	-1.85619	0.294897	-6.05932	1.367e-09	1.64305e-08
ENSMUSG00000074782	4833422C13Rik	antisense	13	RIKEN cDNA 4833422C13 gene	22.6574	-1.85529	0.333839	-5.26778	1.38085e-07	1.26816e-06
ENSMUSG00000035277	Arx	protein_coding	X	Homeobox protein ARX	9.15128	-1.84888	0.400283	-3.64839	0.000263893	0.00132206
ENSMUSG00000042793	Lgr6	protein_coding	1	Leucine-rich repeat-containing G-protein coupled receptor 6	16.2632	-1.83806	0.319914	-5.41643	6.08014e-08	5.89022e-07
ENSMUSG00000037736	Limch1	protein_coding	5	LIM and calponin homology domains-containing protein 1	46.6785	-1.83308	0.299923	-5.79762	6.72611e-09	7.38596e-08
ENSMUSG00000037263	Aldh3b3	protein_coding	19	Aldehyde dehydrogenase family 3 member B3	11.1513	-1.82809	0.39208	-4.06337	4.83693e-05	0.000286174
ENSMUSG00000039431	Mtmr7	protein_coding	8	Myotubularin-related protein 7	10.1568	-1.82647	0.390621	-4.25267	2.11239e-05	0.000134359
ENSMUSG00000049134	Nrap	protein_coding	19	Nebulin-related-anchoring protein	1392.43	-1.82559	0.0879823	-20.7391	1.53721e-95	2.38823e-93
ENSMUSG00000020169	Best3	protein_coding	10	Bestrophin-3	7.07663	-1.82467	0.405226	-3.86246	0.000112249	0.000614898
ENSMUSG00000000120	Ngfr	protein_coding	11	nerve growth factor receptor	28.7017	-1.82064	0.287321	-6.0685	1.29108e-09	1.56186e-08
ENSMUSG00000047728	BC025446	protein_coding	15	cDNA sequence BC025446	33.9575	-1.8201	0.260048	-6.77448	1.2485e-11	1.86875e-10
ENSMUSG00000028415	Spink4	protein_coding	4	serine peptidase inhibitor, Kazal type 4	8.89708	-1.81288	0.399144	-3.58924	0.000331637	0.00162421
ENSMUSG00000063193	Cd300lb	protein_coding	11	Mus musculus CD300 molecule like family member B (Cd300lb), transcript variant 2, mRNA.	8.29824	-1.81023	0.389872	-4.17987	2.9168e-05	0.000179666
ENSMUSG00000075330	A930003A15Rik	protein_coding	16	RIKEN cDNA A930003A15 gene	133.977	-1.81017	0.154126	-11.6529	2.21777e-31	1.0308e-29
ENSMUSG00000042190	Cmklr1	protein_coding	5	Mus musculus chemokine-like receptor 1 (Cmklr1), transcript variant 1, mRNA.	110.583	-1.80252	0.203988	-8.67906	3.99052e-18	9.97868e-17
ENSMUSG00000031636	Pdlim3	protein_coding	8	PDZ and LIM domain protein 3	4199.94	-1.7936	0.0612249	-29.2909	1.35519e-188	6.89054e-186
ENSMUSG00000020882	Cacnb1	protein_coding	11	Voltage-dependent L-type calcium channel subunit beta-1	877.357	-1.79126	0.0843958	-21.2003	9.48297e-100	1.55995e-97
ENSMUSG00000079434	Neu2	protein_coding	1	Sialidase-2	22.5061	-1.79025	0.34189	-4.83006	1.36494e-06	1.07271e-05
ENSMUSG00000048078	Tenm4	protein_coding	7	Teneurin-4	55.4958	-1.78153	0.231943	-7.52951	5.09305e-14	9.72199e-13
ENSMUSG00000028348	Cavin4	protein_coding	4	Caveolae-associated protein 4	3333.34	-1.78103	0.126653	-14.06	6.68549e-45	4.39906e-43
ENSMUSG00000068697	Myoz1	protein_coding	14	Myozenin-1	15.8787	-1.78019	0.365282	-4.45929	8.22321e-06	5.64786e-05
ENSMUSG00000031880	Rrad	protein_coding	8	Ras-related associated with diabetes	183.735	-1.77479	0.151358	-11.6283	2.95809e-31	1.36356e-29
ENSMUSG00000034842	Art3	protein_coding	5	ADP-ribosyltransferase 3	133.294	-1.76562	0.156081	-11.2075	3.74672e-29	1.60373e-27
ENSMUSG00000028655	Mfsd2a	protein_coding	4	Sodium-dependent lysophosphatidylcholine symporter 1	140.153	-1.76075	0.177174	-9.86307	6.01788e-23	2.01948e-21
ENSMUSG00000024827	Gldc	protein_coding	19	Glycine dehydrogenase (decarboxylating), mitochondrial	45.8375	-1.75681	0.250209	-6.81012	9.7516e-12	1.48612e-10
ENSMUSG00000025375	Aatk	protein_coding	11	apoptosis associated tyrosine kinase	12.8073	-1.75621	0.385837	-3.86112	0.000112868	0.000617277
ENSMUSG00000000489	Pdgfb	protein_coding	15	platelet derived growth factor, B polypeptide	83.0909	-1.74899	0.205562	-8.37906	5.33513e-17	1.25905e-15
ENSMUSG00000029095	Ablim2	protein_coding	5	actin-binding LIM protein 2	23.8247	-1.7475	0.345382	-4.66475	3.08991e-06	2.29507e-05
ENSMUSG00000002076	Hsf2bp	protein_coding	17	Heat shock factor 2-binding protein	80.0722	-1.74711	0.208789	-8.26253	1.42621e-16	3.26917e-15
ENSMUSG00000024910	Ctsw	protein_coding	19	cathepsin W	10.5665	-1.74507	0.388378	-3.834	0.000126078	0.000682406
ENSMUSG00000024617	Camk2a	protein_coding	18	Calcium/calmodulin-dependent protein kinase type II subunit alpha	77.8248	-1.74303	0.24623	-6.92319	4.416e-12	6.92487e-11
ENSMUSG00000043747	1520401A03Rik	protein_coding	17	RIKEN cDNA 1520401A03 gene	3.27834	-1.74165	0.407682	-3.45798	0.000544247	0.00253313
ENSMUSG00000021678	F2rl1	protein_coding	13	Proteinase-activated receptor 2	59.3678	-1.74091	0.246365	-6.91111	4.80876e-12	7.51968e-11
ENSMUSG00000049537	Tecrl	protein_coding	5	Trans-2,3-enoyl-CoA reductase-like	79.2316	-1.74021	0.189983	-9.03634	1.6201e-19	4.4273e-18
ENSMUSG00000022510	Trp63	protein_coding	16	transformation related protein 63	44.038	-1.73927	0.324353	-5.15301	2.56341e-07	2.24252e-06
ENSMUSG00000035642	Aamdc	protein_coding	7	adipogenesis associated Mth938 domain containing	695.046	-1.72773	0.0873642	-19.7485	8.26909e-87	1.13727e-84
ENSMUSG00000078606	Gm4070	protein_coding	7	Interferon-induced very large GTPase 1	8.90577	-1.72297	0.368323	-4.26978	1.95668e-05	0.000125166
ENSMUSG00000033453	Adamts15	protein_coding	9	A disintegrin and metalloproteinase with thrombospondin motifs 15	124.722	-1.70771	0.186615	-9.03022	1.71325e-19	4.67425e-18
ENSMUSG00000029381	Shroom3	protein_coding	5	shroom family member 3	97.2691	-1.70368	0.213493	-7.86556	3.67443e-15	7.65878e-14
ENSMUSG00000062760	1810041L15Rik	protein_coding	15	Mus musculus RIKEN cDNA 1810041L15 (1810041L15Rik), transcript variant 2, mRNA.	11.6669	-1.7014	0.393415	-3.57277	0.000353222	0.00172088
ENSMUSG00000025175	Fn3k	protein_coding	11	Fructosamine-3-kinase	92.8155	-1.69986	0.199575	-8.3746	5.54127e-17	1.30402e-15
ENSMUSG00000051855	Mest	protein_coding	6	Mesoderm-specific transcript protein	2860.78	-1.69607	0.0672484	-25.2172	2.59519e-140	7.5077e-138
ENSMUSG00000048489	8430408G22Rik	protein_coding	6	Protein DEPP1	60.3797	-1.69555	0.233265	-7.12012	1.07837e-12	1.80759e-11
ENSMUSG00000028773	Fabp3	protein_coding	4	Fatty acid-binding protein, heart	40.352	-1.68918	0.266089	-6.17628	6.56293e-10	8.24247e-09
ENSMUSG00000030701	Plekhb1	protein_coding	7	pleckstrin homology domain containing, family B (evectins) member 1	42.4713	-1.68839	0.244925	-6.7395	1.58937e-11	2.35792e-10
ENSMUSG00000050272	Dscam	protein_coding	16	Down syndrome cell adhesion molecule homolog	31.2716	-1.6852	0.275836	-5.94283	2.80144e-09	3.24399e-08
ENSMUSG00000050395	Tnfsf15	protein_coding	4	tumor necrosis factor (ligand) superfamily, member 15	44.5815	-1.67666	0.249566	-6.57504	4.86397e-11	6.93985e-10
ENSMUSG00000026489	Coq8a	protein_coding	1	Atypical kinase COQ8A, mitochondrial	526.53	-1.67277	0.116769	-14.297	2.28387e-46	1.55777e-44
ENSMUSG00000022215	Fitm1	protein_coding	14	Fat storage-inducing transmembrane protein 1	14.0658	-1.67263	0.343534	-4.55909	5.13746e-06	3.65106e-05
ENSMUSG00000026840	Lamc3	protein_coding	2	Laminin subunit gamma-3	8.90739	-1.67208	0.398341	-3.63778	0.000275001	0.00137165
ENSMUSG00000049565	Aknad1	protein_coding	3	AKNA domain containing 1	34.7057	-1.67019	0.28147	-5.78594	7.21089e-09	7.88842e-08
ENSMUSG00000000159	Igsf5	protein_coding	16		130.122	-1.66693	0.166086	-9.94499	2.65208e-23	8.97162e-22
ENSMUSG00000063296	Tmem117	protein_coding	15	Transmembrane protein 117	47.09	-1.66663	0.23762	-6.8629	6.7478e-12	1.03873e-10
ENSMUSG00000028518	Prkaa2	protein_coding	4	protein kinase, AMP-activated, alpha 2 catalytic subunit	91.519	-1.66634	0.186049	-8.85432	8.41976e-19	2.20742e-17
ENSMUSG00000030336	Cd27	protein_coding	6	CD27 antigen	12.2418	-1.6649	0.377481	-4.0201	5.81725e-05	0.00033868
ENSMUSG00000037820	Tgm2	protein_coding	2	Protein-glutamine gamma-glutamyltransferase 2	584.776	-1.66026	0.0922416	-17.9767	2.96603e-72	3.13e-70
ENSMUSG00000042686	Jph1	protein_coding	1	Junctophilin-1	725.513	-1.65596	0.0885689	-18.6777	7.51677e-78	8.63862e-76
ENSMUSG00000087408	Cers1	protein_coding	8	Ceramide synthase 1	29.1378	-1.65391	0.278916	-5.73153	9.95274e-09	1.07256e-07
ENSMUSG00000105298	Cldn25-ps	processed_pseudogene	9	claudin 25, pseudogene	2.46832	-1.64844	0.404787	-3.2604	0.00111254	0.00482984
ENSMUSG00000032380	Dapk2	protein_coding	9	Death-associated protein kinase 2	1383.48	-1.64697	0.0614748	-26.7761	6.12909e-158	2.1425e-155
ENSMUSG00000086932	Gm22000	processed_transcript	11	predicted gene 22000	5.77756	-1.6456	0.40586	-3.5716	0.000354803	0.00172758
ENSMUSG00000066026	Dhrs3	protein_coding	4	Short-chain dehydrogenase/reductase 3	323.715	-1.6411	0.111051	-14.7194	4.83871e-49	3.4845e-47
ENSMUSG00000020427	Igfbp3	protein_coding	11	Insulin-like growth factor-binding protein 3	346.862	-1.6394	0.113573	-14.3963	5.45812e-47	3.78437e-45
ENSMUSG00000043126	D830039M14Rik	antisense	10		27.2209	-1.63637	0.283861	-5.58251	2.37077e-08	2.42852e-07
ENSMUSG00000087579	Hectd2os	processed_transcript	19	Hectd2, opposite strand	68.0255	-1.61816	0.210813	-7.56126	3.99193e-14	7.69007e-13
ENSMUSG00000030745	Il21r	protein_coding	7	Interleukin-21 receptor	5.07558	-1.61767	0.407963	-3.90162	9.55522e-05	0.000530885
ENSMUSG00000036052	Dnajb5	protein_coding	4	Mus musculus DnaJ heat shock protein family (Hsp40) member B5 (Dnajb5), transcript variant 3, mRNA.	430.476	-1.61754	0.0960733	-16.8028	2.32693e-63	2.1571e-61
ENSMUSG00000032122	Slc37a2	protein_coding	9	solute carrier family 37 (glycerol-3-phosphate transporter), member 2	314.102	-1.61671	0.0969786	-16.6276	4.39741e-62	4.03192e-60
ENSMUSG00000053702	Nebl	protein_coding	2	LIM zinc-binding domain-containing Nebulette	68.8566	-1.61455	0.187318	-8.51848	1.61667e-17	3.94274e-16
ENSMUSG00000026343	Gpr39	protein_coding	1	G protein-coupled receptor 39	92.4388	-1.61246	0.176881	-9.03707	1.60932e-19	4.40502e-18
ENSMUSG00000026241	Nppc	protein_coding	1	natriuretic peptide type C	3.36607	-1.60906	0.408851	-3.94542	7.96612e-05	0.000450957
ENSMUSG00000026676	Ccdc3	protein_coding	2	Coiled-coil domain-containing protein 3	24.0485	-1.60502	0.2961	-5.2335	1.66329e-07	1.50287e-06
ENSMUSG00000036006	Ripor2	protein_coding	13	RHO family interacting cell polarization regulator 2	48.1473	-1.60282	0.231914	-6.79262	1.10117e-11	1.66306e-10
ENSMUSG00000020676	Ccl11	protein_coding	11	Eotaxin	33.9973	-1.59268	0.303713	-5.07254	3.92546e-07	3.34511e-06
ENSMUSG00000020904	Cfap52	protein_coding	11	Cilia- and flagella-associated protein 52	7.10035	-1.59254	0.402889	-3.4059	0.000659458	0.00300844
ENSMUSG00000090439	Gm17455	protein_coding	10	chromosome 10 open reading frame 105	88.3007	-1.59223	0.183983	-8.5511	1.21921e-17	2.99082e-16
ENSMUSG00000037188	Grhl3	protein_coding	4	Grainyhead-like	18.1524	-1.58964	0.341215	-4.36239	1.28647e-05	8.47161e-05
ENSMUSG00000018983	E2f2	protein_coding	4	Transcription factor E2F2	1265.09	-1.58771	0.0708891	-22.3882	5.13335e-111	1.01332e-108
ENSMUSG00000085826	Gm15638	antisense	16	predicted gene 15638	4.66926	-1.58597	0.408317	-3.24604	0.00117021	0.00505014
ENSMUSG00000026308	Klhl30	protein_coding	1	Kelch-like protein 30	2744.13	-1.58098	0.0584503	-27.044	4.48768e-161	1.63693e-158
ENSMUSG00000061859	Patj	protein_coding	4	Mus musculus PATJ, crumbs cell polarity complex component (Patj), transcript variant 5, mRNA.	1235.81	-1.58037	0.070264	-22.4805	6.44416e-112	1.28722e-109
ENSMUSG00000033788	Dysf	protein_coding	6	Dysferlin	578.406	-1.57916	0.0956886	-16.4804	5.07521e-61	4.52962e-59
ENSMUSG00000063646	Jakmip1	protein_coding	5	Janus kinase and microtubule-interacting protein 1	26.9006	-1.57751	0.356154	-4.19749	2.69888e-05	0.00016741
ENSMUSG00000067818	Myl9	protein_coding	2	Myosin regulatory light polypeptide 9	2239.2	-1.57214	0.062096	-25.3116	2.37916e-141	7.0035e-139
ENSMUSG00000087117	Gm11523	processed_transcript	11	predicted gene 11523	10.7368	-1.57172	0.380924	-3.8086	0.000139753	0.000750063
ENSMUSG00000028838	Extl1	protein_coding	4	Exostosin-like 1	19.0363	-1.56847	0.33625	-4.45574	8.36051e-06	5.73277e-05
ENSMUSG00000063659	Zbtb18	protein_coding	1	zinc finger and BTB domain containing 18	1921.69	-1.56561	0.0599598	-26.1042	3.26619e-150	1.09607e-147
ENSMUSG00000032010	Usp2	protein_coding	9	ubiquitin specific peptidase 2	95.2467	-1.56295	0.167447	-9.25327	2.17734e-20	6.25576e-19
ENSMUSG00000052135	Foxo6	protein_coding	4	Forkhead box protein O6	147.665	-1.55977	0.163698	-9.48888	2.33524e-21	7.02205e-20
ENSMUSG00000107655	Gm44220	TEC	6	predicted gene, 44220	7.67391	-1.55913	0.404614	-3.21637	0.00129823	0.00553993
ENSMUSG00000055805	Fmnl1	protein_coding	11	Formin-like protein 1	36.7926	-1.55727	0.270224	-5.65352	1.57195e-08	1.65261e-07
ENSMUSG00000021622	Ckmt2	protein_coding	13	Creatine kinase S-type, mitochondrial	4.75706	-1.5517	0.409716	-3.31558	0.000914532	0.00406812
ENSMUSG00000001473	Tubb6	protein_coding	18	tubulin, beta 6 class V	8400.99	-1.55039	0.0524828	-29.5401	8.78847e-192	4.91539e-189
ENSMUSG00000102838	Gm37014	TEC	1	predicted gene, 37014	5.27639	-1.54838	0.409848	-3.07508	0.00210449	0.00849646
ENSMUSG00000047485	Klhl34	protein_coding	X	kelch like family member 34	7.62968	-1.54397	0.40793	-3.36688	0.00076023	0.003429
ENSMUSG00000038151	Prdm1	protein_coding	10	PR domain zinc finger protein 1	5.17611	-1.54217	0.408279	-3.36384	0.000768671	0.00346521
ENSMUSG00000028420	Tmem38b	protein_coding	4	Trimeric intracellular cation channel type B	646.696	-1.54205	0.0805369	-19.1265	1.5184e-81	1.8872e-79
ENSMUSG00000027776	Il12a	protein_coding	3	interleukin 12a	37.1081	-1.5378	0.251821	-5.98417	2.17496e-09	2.55379e-08
ENSMUSG00000023959	Clic5	protein_coding	17	Chloride intracellular channel protein 5	106.451	-1.53489	0.183717	-8.27833	1.24914e-16	2.89093e-15
ENSMUSG00000031355	Arhgap6	protein_coding	X	Rho GTPase activating protein 6	13.9276	-1.53152	0.32834	-4.44595	8.75039e-06	5.97327e-05
ENSMUSG00000028464	Tpm2	protein_coding	4	tropomyosin 2, beta	14607.8	-1.5312	0.0964473	-15.876	9.29705e-57	7.536e-55
ENSMUSG00000101517	4732465J04Rik	lincRNA	10	RIKEN cDNA 4732465J04 gene	6.60152	-1.52973	0.409769	-3.12307	0.00178973	0.00738559
ENSMUSG00000021768	Dusp13	protein_coding	14	Dual specificity protein phosphatase 13 isoform A	296.795	-1.52822	0.122702	-12.4308	1.77852e-35	9.47356e-34
ENSMUSG00000033182	Kbtbd12	protein_coding	6	Kelch repeat and BTB domain-containing protein 12	31.2572	-1.52171	0.269741	-5.50501	3.69141e-08	3.68022e-07
ENSMUSG00000084843	B230312C02Rik	lincRNA	2	RIKEN cDNA B230312C02 gene	10.6153	-1.51978	0.382357	-3.78244	0.000155301	0.000824618
ENSMUSG00000060548	Tnfrsf19	protein_coding	14	Tumor necrosis factor receptor superfamily member 19	16.1241	-1.51134	0.376785	-3.72927	0.000192038	0.000998203
ENSMUSG00000026211	Obsl1	protein_coding	1	Obscurin-like protein 1	2354.22	-1.50842	0.0846488	-17.8171	5.21096e-71	5.43073e-69
ENSMUSG00000039070	Cpa4	protein_coding	6	Carboxypeptidase A4	12.399	-1.50722	0.371944	-3.87887	0.000104941	0.000579016
ENSMUSG00000032528	Vipr1	protein_coding	9	vasoactive intestinal peptide receptor 1	18.8908	-1.50274	0.297708	-4.8582	1.18456e-06	9.38861e-06
ENSMUSG00000037813	D630003M21Rik	protein_coding	2	Uncharacterized	7.06724	-1.50001	0.405841	-3.22953	0.00123996	0.00532647
ENSMUSG00000099338	2810030D12Rik	bidirectional_promoter_lncRNA	8	RIKEN cDNA 2810030D12 gene	8.45309	-1.49858	0.40388	-3.20989	0.00132784	0.00564476
ENSMUSG00000021579	Lrrc14b	protein_coding	13	Leucine-rich repeat-containing protein 14B	26.1328	-1.49081	0.301337	-4.76687	1.87108e-06	1.44013e-05
ENSMUSG00000037211	Spry1	protein_coding	3	sprouty RTK signaling antagonist 1	239.892	-1.48981	0.130952	-11.3318	9.12849e-30	4.00961e-28
ENSMUSG00000015090	Ptgds	protein_coding	2	Prostaglandin-H2 D-isomerase	11.6814	-1.47908	0.405232	-3.42848	0.000606974	0.00278872
ENSMUSG00000045094	Arhgef37	protein_coding	18	Rho guanine nucleotide exchange factor 37	37.453	-1.47341	0.255322	-5.66678	1.45506e-08	1.5384e-07
ENSMUSG00000085479	9430073C21Rik	antisense	11	Riken cDNA 9430073C21 gene	9.5333	-1.47239	0.3925	-3.43745	0.000587217	0.00270628
ENSMUSG00000066113	Adamtsl1	protein_coding	4	ADAMTS-like protein 1	54.0276	-1.47074	0.242763	-5.97046	2.36584e-09	2.76053e-08
ENSMUSG00000038859	Baiap2l1	protein_coding	5	Brain-specific angiosis inhibitor 1-associated protein 2-like protein 1	1100.83	-1.46926	0.0868716	-16.9089	3.8655e-64	3.68518e-62
ENSMUSG00000068114	Ccdc134	protein_coding	15	Coiled-coil domain-containing protein 134	628.871	-1.46808	0.0776603	-18.8862	1.48062e-79	1.74953e-77
ENSMUSG00000031448	Adprhl1	protein_coding	8	[Protein ADP-ribosylarginine] hydrolase-like protein 1	16.1428	-1.46248	0.372978	-3.68632	0.000227524	0.00116002
ENSMUSG00000042485	Mustn1	protein_coding	14	Musculoskeletal embryonic nuclear protein 1	797.685	-1.46232	0.0920282	-15.8795	8.78307e-57	7.15394e-55
ENSMUSG00000059742	Kcnh7	protein_coding	2	Potassium voltage-gated channel subfamily H member 7	26.83	-1.46055	0.266216	-5.35499	8.55615e-08	8.11094e-07
ENSMUSG00000103756	Gm37285	TEC	1	predicted gene, 37285	6.14329	-1.45932	0.405636	-3.31843	0.00090524	0.00402999
ENSMUSG00000017491	Rarb	protein_coding	14	retinoic acid receptor, beta	7.47951	-1.45849	0.380547	-3.53991	0.000400269	0.00192164
ENSMUSG00000053025	Sv2b	protein_coding	7	Synaptic vesicle glycoprotein 2B	106.722	-1.45457	0.168955	-8.55924	1.13609e-17	2.79099e-16
ENSMUSG00000042724	Map3k9	protein_coding	12	Mitogen-activated protein kinase kinase kinase 9	31.8843	-1.45425	0.25247	-5.65262	1.58017e-08	1.65918e-07
ENSMUSG00000047591	Mafa	protein_coding	15	Transcription factor MafA	90.8553	-1.45395	0.183737	-7.84371	4.37438e-15	9.07266e-14
ENSMUSG00000034648	Lrrn1	protein_coding	6	Leucine-rich repeat neuronal protein 1	1172.41	-1.45367	0.0646213	-22.485	5.82111e-112	1.17678e-109
ENSMUSG00000110580	D830024N08Rik	antisense	8	RIKEN cDNA D830024N08 gene	3.62594	-1.45202	0.410034	-3.16057	0.00157462	0.00658211
ENSMUSG00000099906	Gm28653	lincRNA	1	predicted gene 28653	878.638	-1.44981	0.198176	-7.31238	2.62455e-13	4.65512e-12
ENSMUSG00000097379	Gm26873	lincRNA	17	predicted gene, 26873	12.6083	-1.4479	0.36727	-3.74869	0.000177762	0.000929759
ENSMUSG00000025020	Slit1	protein_coding	19	Slit homolog 1 protein	5.95245	-1.44044	0.409208	-3.23232	0.00122788	0.00527999
ENSMUSG00000020401	Fam71b	protein_coding	11	Protein FAM71B	14.2195	-1.43976	0.338492	-4.07876	4.52758e-05	0.000269511
ENSMUSG00000027499	Pkia	protein_coding	3	cAMP-dependent protein kinase inhibitor alpha	4715.95	-1.43358	0.0509159	-28.1542	2.12704e-174	8.92239e-172
ENSMUSG00000032323	Cyp11a1	protein_coding	9	Cholesterol side-chain cleavage enzyme, mitochondrial	10.1638	-1.43143	0.372882	-3.65141	0.000260799	0.00130767
ENSMUSG00000031952	Chst5	protein_coding	8	Carbohydrate sulfotransferase 5	7.24084	-1.42981	0.406371	-3.32144	0.00089554	0.00399529
ENSMUSG00000027887	Sypl2	protein_coding	3	Synaptophysin-like protein 2	5.46764	-1.42677	0.410823	-3.22382	0.00126495	0.0054172
ENSMUSG00000055134	9130017K11Rik	processed_transcript	11	RIKEN cDNA 9130017K11 gene	3.89909	-1.42551	0.410943	-2.97635	0.00291699	0.0113402
ENSMUSG00000071984	Fndc1	protein_coding	17	fibronectin type III domain containing 1	288.509	-1.42439	0.144428	-9.84629	7.11174e-23	2.36762e-21
ENSMUSG00000026475	Rgs16	protein_coding	1	regulator of G-protein signaling 16	216.18	-1.4216	0.12145	-11.6746	1.71812e-31	8.07517e-30
ENSMUSG00000051590	Map3k19	protein_coding	1	Mitogen-activated protein kinase kinase kinase 19	14.287	-1.41986	0.362255	-3.73419	0.000188322	0.00098071
ENSMUSG00000063415	Cyp26b1	protein_coding	6	Cytochrome P450 26B1	5.89678	-1.41767	0.409132	-3.27903	0.00104163	0.00456094
ENSMUSG00000045326	Fndc7	protein_coding	3	Fibronectin type III domain-containing protein 7	12.0576	-1.4169	0.359116	-3.77749	0.000158417	0.000839303
ENSMUSG00000026885	Ttll11	protein_coding	2	tubulin tyrosine ligase-like family, member 11	103.341	-1.41625	0.161837	-8.69744	3.39448e-18	8.55194e-17
ENSMUSG00000063275	Hacd1	protein_coding	2	3-hydroxyacyl-CoA dehydratase 1	1067.97	-1.41334	0.0754341	-18.7293	2.85859e-78	3.33085e-76
ENSMUSG00000007682	Dio2	protein_coding	12	Type II iodothyronine deiodinase	277.101	-1.40721	0.119532	-11.7512	6.96343e-32	3.32876e-30
ENSMUSG00000033633	Clec18a	protein_coding	8	C-type lectin domain family 18 member A	5.62861	-1.40609	0.408051	-3.65257	0.000259625	0.00130232
ENSMUSG00000023067	Cdkn1a	protein_coding	17	Cyclin-dependent kinase inhibitor 1	3253.95	-1.40567	0.0586522	-23.9637	6.65789e-127	1.66735e-124
ENSMUSG00000051029	Serpinb1b	protein_coding	13	serine (or cysteine) peptidase inhibitor, clade B, member 1b	12.7278	-1.40133	0.351107	-3.81377	0.000136864	0.000735333
ENSMUSG00000035934	Pknox2	protein_coding	9	Homeobox protein PKNOX2	87.3292	-1.4004	0.17884	-7.77833	7.34892e-15	1.49645e-13
ENSMUSG00000027375	Mal	protein_coding	2	Myelin and lymphocyte protein	16.1353	-1.39941	0.339029	-3.96602	7.30822e-05	0.000417041
ENSMUSG00000067071	Hes6	protein_coding	1	Transcription cofactor HES-6	2317.34	-1.39299	0.0672342	-20.7162	2.473e-95	3.80683e-93
ENSMUSG00000022225	Cma1	protein_coding	14	Chymase	5.29348	-1.39194	0.409128	-3.1234	0.00178772	0.00738095
ENSMUSG00000039714	Cplx3	protein_coding	9	Complexin-3	3.89926	-1.38824	0.411285	-2.95668	0.0031097	0.0119811
ENSMUSG00000060735	Rxfp3	protein_coding	15	Relaxin-3 receptor 1	3.4869	-1.38289	0.410353	-3.09252	0.00198463	0.00807081
ENSMUSG00000041189	Chrnb1	protein_coding	11	cholinergic receptor, nicotinic, beta polypeptide 1 (muscle)	1410.21	-1.38194	0.0640023	-21.5872	2.36958e-103	4.14159e-101
ENSMUSG00000076928	Trac	TR_C_gene	14	T cell receptor alpha constant	18.7111	-1.37602	0.333053	-4.03099	5.55413e-05	0.000325166
ENSMUSG00000020216	Jsrp1	protein_coding	10	Junctional sarcoplasmic reticulum protein 1	1269.13	-1.37501	0.0723015	-19.0115	1.36873e-80	1.65223e-78
ENSMUSG00000046352	Gjb2	protein_coding	14	gap junction protein, beta 2	4.48971	-1.37086	0.411261	-2.98336	0.00285107	0.0111148
ENSMUSG00000017386	Traf4	protein_coding	11	TNF receptor-associated factor 4	1740.44	-1.37073	0.0684996	-20.0071	4.77435e-89	6.73183e-87
ENSMUSG00000079049	Serpinb1c	protein_coding	13	serine (or cysteine) peptidase inhibitor, clade B, member 1c	4.30369	-1.36576	0.41029	-2.99482	0.0027461	0.0107581
ENSMUSG00000000202	Btbd17	protein_coding	11	BTB/POZ domain-containing protein 17	159.565	-1.36388	0.136723	-9.94117	2.7556e-23	9.26578e-22
ENSMUSG00000045106	Ccdc73	protein_coding	2	Coiled-coil domain-containing protein 73	99.5473	-1.36349	0.170774	-7.93377	2.12595e-15	4.51535e-14
ENSMUSG00000054672	5830411N06Rik	protein_coding	7	RIKEN cDNA 5830411N06 gene	7.31701	-1.36124	0.404372	-3.20873	0.00133323	0.0056648
ENSMUSG00000049422	Chchd10	protein_coding	10	coiled-coil-helix-coiled-coil-helix domain containing 10	52.049	-1.35551	0.232686	-5.77851	7.53644e-09	8.22197e-08
ENSMUSG00000028841	Cnksr1	protein_coding	4	connector enhancer of kinase suppressor of Ras 1	5.15812	-1.35419	0.408665	-3.0365	0.00239342	0.0095277
ENSMUSG00000014773	Dll1	protein_coding	17	Delta-like protein 1 Dll1-soluble form Dll1-derived cell-associated form Dll1-intracellular form	540.217	-1.35296	0.0962523	-14.0431	8.49586e-45	5.54677e-43
ENSMUSG00000022018	Rgcc	protein_coding	14	Regulator of cell cycle RGCC	68.649	-1.34878	0.210028	-6.38985	1.66052e-10	2.25055e-09
ENSMUSG00000106651	Gm42608	TEC	3	predicted gene 42608	5.60985	-1.34009	0.406269	-3.08903	0.00200809	0.00814646
ENSMUSG00000085327	Gm16104	antisense	10	predicted gene 16104	5.65315	-1.33766	0.402156	-3.04038	0.00236282	0.00941481
ENSMUSG00000052013	Btla	protein_coding	16	B and T lymphocyte associated	9.91307	-1.33728	0.3692	-3.45908	0.000542023	0.00252348
ENSMUSG00000053964	Lgals4	protein_coding	7	Galectin-4	29.5898	-1.33418	0.304979	-4.29607	1.7385e-05	0.000112193
ENSMUSG00000025582	Nptx1	protein_coding	11	neuronal pentraxin 1	728.375	-1.32959	0.0731413	-18.1644	9.88544e-74	1.07706e-71
ENSMUSG00000014813	Stc1	protein_coding	14	stanniocalcin 1	16.021	-1.32928	0.34282	-3.77157	0.000162221	0.000855944
ENSMUSG00000026387	Sctr	protein_coding	1	Secretin receptor	8.21904	-1.32101	0.390879	-3.211	0.00132274	0.00562879
ENSMUSG00000021451	Sema4d	protein_coding	13	Semaphorin-4D	30.0778	-1.31887	0.290902	-4.44217	8.90558e-06	6.07179e-05
ENSMUSG00000097640	Gm20033	processed_transcript	5	predicted gene, 20033	19.2003	-1.31432	0.333111	-3.85829	0.000114183	0.000623862
ENSMUSG00000070368	Prok1	protein_coding	3	Prokineticin-1	4.34683	-1.31428	0.411547	-2.83844	0.0045334	0.0166958
ENSMUSG00000044006	Cilp2	protein_coding	8	Cartilage intermediate layer protein 2 Cartilage intermediate layer protein 2 C1 Cartilage intermediate layer protein 2 C2	24.1373	-1.31071	0.304388	-4.19392	2.74172e-05	0.000169817
ENSMUSG00000050556	Kcnb1	protein_coding	2	Potassium voltage-gated channel subfamily B member 1	81.4547	-1.30894	0.232538	-5.59615	2.1916e-08	2.25324e-07
ENSMUSG00000060716	Plekhh1	protein_coding	12	Pleckstrin homology domain-containing family H member 1	189.341	-1.30512	0.132163	-9.85338	6.62765e-23	2.21524e-21
ENSMUSG00000056602	Fry	protein_coding	5	FRY microtubule binding protein	98.9937	-1.30177	0.200673	-6.46293	1.02692e-10	1.41467e-09
ENSMUSG00000021750	Fam107a	protein_coding	14	family with sequence similarity 107 member A	90.596	-1.30159	0.18653	-6.92412	4.3869e-12	6.88567e-11
ENSMUSG00000021798	Ldb3	protein_coding	14	LIM domain-binding protein 3	677.11	-1.30094	0.0991185	-13.1165	2.65021e-39	1.54402e-37
ENSMUSG00000068747	Sort1	protein_coding	3	Sortilin	294.245	-1.3008	0.127361	-10.1994	1.994e-24	7.07344e-23
ENSMUSG00000110266	Gm32742	protein_coding	9		4.47264	-1.2986	0.411386	-2.78522	0.00534922	0.0192339
ENSMUSG00000060600	Eno3	protein_coding	11	Beta-enolase	11137.6	-1.29642	0.0557628	-23.2486	1.46951e-119	3.12112e-117
ENSMUSG00000027398	Il1b	protein_coding	2	Interleukin-1 beta	8.83342	-1.29502	0.404621	-3.04695	0.00231175	0.00924164
ENSMUSG00000017817	Jph2	protein_coding	2	Junctophilin-2	4609.86	-1.29237	0.0459729	-28.1099	7.40549e-174	2.95849e-171
ENSMUSG00000081890	Gm11243	processed_pseudogene	4	predicted gene 11243	5.31619	-1.2914	0.405369	-2.94533	0.00322613	0.0123927
ENSMUSG00000083679	Gm12892	processed_pseudogene	4	predicted gene 12892	86.0645	-1.29056	0.183165	-7.00835	2.4114e-12	3.91683e-11
ENSMUSG00000111052	Gm20139	lincRNA	10	predicted gene, 20139	4.46292	-1.29027	0.409827	-3.57575	0.00034922	0.00170237
ENSMUSG00000020836	Coro6	protein_coding	11	Coronin-6	174.271	-1.28828	0.132751	-9.67695	3.77808e-22	1.18049e-20
ENSMUSG00000044177	Wfikkn2	protein_coding	11	WAP, follistatin/kazal, immunoglobulin, kunitz and netrin domain containing 2	4.49098	-1.28818	0.410677	-2.97763	0.0029049	0.0113036
ENSMUSG00000059173	Pde1a	protein_coding	2	phosphodiesterase 1A, calmodulin-dependent	14.6371	-1.28739	0.336374	-3.72189	0.000197736	0.00102465
ENSMUSG00000116068	AC100400.1	lincRNA	15		5.78055	-1.28698	0.40429	-2.97474	0.00293235	0.0113867
ENSMUSG00000026062	Slc9a2	protein_coding	1	solute carrier family 9 (sodium/hydrogen exchanger), member 2	363.562	-1.28653	0.0947984	-13.5552	7.38191e-42	4.50404e-40
ENSMUSG00000027777	Schip1	protein_coding	3	schwannomin interacting protein 1	21.2164	-1.2863	0.30479	-4.13654	3.52583e-05	0.000213651
ENSMUSG00000006529	Itih1	protein_coding	14	Inter-alpha-trypsin inhibitor heavy chain H1	3.42178	-1.28118	0.404615	-3.42879	0.000606275	0.00278704
ENSMUSG00000020037	Rfx4	protein_coding	10	Transcription factor RFX4	4.29804	-1.28018	0.410912	-2.82607	0.00471234	0.0172638
ENSMUSG00000091475	2810468N07Rik	processed_transcript	17	RIKEN cDNA 2810468N07 gene	35.4826	-1.27856	0.242674	-5.19972	1.99588e-07	1.78608e-06
ENSMUSG00000094131	Gm22265	snRNA	1	predicted gene, 22265	2.6463	-1.27671	0.407052	-2.63428	0.00843162	0.0284828
ENSMUSG00000112527	Gm35696	lincRNA	10	predicted gene, 35696	3.12336	-1.2734	0.402854	-3.43848	0.000584994	0.00270105
ENSMUSG00000028417	Tal2	protein_coding	4	T cell acute lymphocytic leukemia 2	10.9522	-1.27302	0.354475	-3.44019	0.000581315	0.00268554
ENSMUSG00000026094	Stk17b	protein_coding	1	Serine/threonine-protein kinase 17B	3447.09	-1.27194	0.0587281	-21.657	5.22029e-104	9.22014e-102
ENSMUSG00000018819	Lsp1	protein_coding	7	Lymphocyte-specific protein 1	2674.19	-1.26936	0.048814	-26.0016	4.75385e-149	1.53394e-146
ENSMUSG00000031376	Atp2b3	protein_coding	X	ATPase, Ca++ transporting, plasma membrane 3	3.5019	-1.26661	0.406268	-3.44529	0.000570438	0.00264403
ENSMUSG00000043333	Rhbdl2	protein_coding	4	Rhomboid-related protein 2 Rhomboid-related protein 2, N-terminal fragment Rhomboid-related protein 2, C-terminal fragment	15.7856	-1.26383	0.344228	-3.60497	0.000312192	0.00153705
ENSMUSG00000021319	Sfrp4	protein_coding	13	secreted frizzled-related protein 4	28.9969	-1.26181	0.263361	-4.72273	2.32702e-06	1.766e-05
ENSMUSG00000040998	Npnt	protein_coding	3	Nephronectin	2270.59	-1.26089	0.0748139	-16.8524	1.00681e-63	9.38516e-62
ENSMUSG00000020089	Ppa1	protein_coding	10	pyrophosphatase (inorganic) 1	2532.2	-1.26077	0.0673199	-18.7266	3.0048e-78	3.47707e-76
ENSMUSG00000044072	Eml6	protein_coding	11	Echinoderm microtubule-associated protein-like 6	82.1881	-1.25996	0.172064	-7.27822	3.38255e-13	5.91206e-12
ENSMUSG00000087410	2310065F04Rik	lincRNA	11	RIKEN cDNA 2310065F04 gene	4.98094	-1.25989	0.412048	-2.74454	0.0060596	0.0214186
ENSMUSG00000033965	Slc16a2	protein_coding	X	solute carrier family 16 (monocarboxylic acid transporters), member 2	13.3021	-1.25883	0.364164	-3.31382	0.000920308	0.00409056
ENSMUSG00000061911	Myt1l	protein_coding	12	Myelin transcription factor 1-like protein	2.39538	-1.25787	0.406176	-2.57232	0.0101021	0.0332163
ENSMUSG00000045620	Odf3l1	protein_coding	9	Outer dense fiber protein 3-like protein 1	10.9181	-1.25682	0.364308	-3.30115	0.000962903	0.00425845
ENSMUSG00000034555	Tex16	protein_coding	X	testis expressed gene 16	7.17937	-1.25679	0.411618	-2.89524	0.00378866	0.0142982
ENSMUSG00000000290	Itgb2	protein_coding	10		19.1486	-1.25645	0.300621	-4.07299	4.64127e-05	0.000275569
ENSMUSG00000091055	Siglec15	protein_coding	18	sialic acid binding Ig-like lectin 15	46.6897	-1.25305	0.225256	-5.5051	3.68956e-08	3.68022e-07
ENSMUSG00000110639	Gm6831	transcribed_unprocessed_pseudogene	8	predicted gene 6831	2.20479	-1.24748	0.397868	-2.73105	0.00631334	0.0222026
ENSMUSG00000030905	Crym	protein_coding	7	Ketimine reductase mu-crystallin	19.7212	-1.24685	0.364115	-3.36165	0.000774785	0.00348996
ENSMUSG00000060459	Kng2	protein_coding	16	kininogen 2	28.4525	-1.24423	0.257154	-4.71789	2.38306e-06	1.80765e-05
ENSMUSG00000060913	Trim55	protein_coding	3	tripartite motif-containing 55	868.699	-1.24373	0.0755277	-16.46	7.10945e-61	6.31161e-59
ENSMUSG00000074218	Cox7a1	protein_coding	7	Cytochrome c oxidase subunit 7A1, mitochondrial	23.4667	-1.2433	0.284822	-4.28248	1.84823e-05	0.000118727
ENSMUSG00000026288	Inpp5d	protein_coding	1	Phosphatidylinositol 3,4,5-trisphosphate 5-phosphatase 1	5.45741	-1.243	0.408848	-2.86807	0.0041298	0.0153952
ENSMUSG00000042812	Foxf1	protein_coding	8	Forkhead box protein F1	6.83446	-1.24195	0.395298	-2.96583	0.00301864	0.0116812
ENSMUSG00000035783	Acta2	protein_coding	19	Actin, aortic smooth muscle Actin, aortic smooth muscle, intermediate form	30314.2	-1.24088	0.0533936	-23.2402	1.78679e-119	3.7013e-117
ENSMUSG00000054555	Adam12	protein_coding	7	Disintegrin and metalloproteinase domain-containing protein 12	84.293	-1.24019	0.193911	-6.3693	1.89894e-10	2.55923e-09
ENSMUSG00000052512	Nav2	protein_coding	7	neuron navigator 2	162.941	-1.22942	0.153165	-8.00892	1.15722e-15	2.47982e-14
ENSMUSG00000047959	Kcna3	protein_coding	3	Potassium voltage-gated channel subfamily A member 3	11.5045	-1.22879	0.363369	-3.26846	0.00108134	0.00471046
ENSMUSG00000048520	Fbxl13	protein_coding	5	F-box/LRR-repeat protein 13	47.086	-1.22824	0.247768	-4.93365	8.07087e-07	6.5611e-06
ENSMUSG00000056145	AI504432	lincRNA	3	expressed sequence AI504432	40.5574	-1.22815	0.232371	-5.21346	1.85353e-07	1.67027e-06
ENSMUSG00000066705	Fxyd6	protein_coding	9	FXYD domain-containing ion transport regulator 6	12.9927	-1.22787	0.405218	-2.90756	0.0036426	0.0138248
ENSMUSG00000024176	Sox8	protein_coding	17	SRY (sex determining region Y)-box 8	272.082	-1.22676	0.127293	-9.62598	6.21096e-22	1.91569e-20
ENSMUSG00000000794	Kcnn3	protein_coding	3	Small conductance calcium-activated potassium channel protein 3	150.926	-1.22601	0.167867	-7.28019	3.33349e-13	5.83848e-12
ENSMUSG00000013415	Igf2bp1	protein_coding	11	Insulin-like growth factor 2 mRNA-binding protein 1	6.70198	-1.22566	0.390479	-2.96492	0.00302764	0.0117106
ENSMUSG00000034156	Tspoap1	protein_coding	11	Peripheral-type benzodiazepine receptor-associated protein 1	22.1752	-1.22499	0.300367	-4.01347	5.9832e-05	0.000347697
ENSMUSG00000068105	Tnfrsf13c	protein_coding	15	tumor necrosis factor receptor superfamily, member 13c	4.63989	-1.22436	0.411605	-2.75006	0.00595842	0.0211468
ENSMUSG00000013483	Card14	protein_coding	11	Caspase recruitment domain-containing protein 14	22.9029	-1.22231	0.296921	-4.04728	5.18171e-05	0.000304212
ENSMUSG00000086266	Igf2os	antisense	7	insulin-like growth factor 2, opposite strand	3.9899	-1.21738	0.408934	-3.45916	0.00054187	0.00252346
ENSMUSG00000061601	Pclo	protein_coding	5	Protein piccolo	28.9374	-1.21557	0.287306	-4.18014	2.91324e-05	0.000179512
ENSMUSG00000092021	Gbp11	polymorphic_pseudogene	5	Mus musculus guanylate binding protein 11 (Gbp11), transcript variant 1, mRNA.	2.12923	-1.21498	0.395964	-2.47132	0.0134615	0.0423682
ENSMUSG00000085272	Sbk3	protein_coding	7	Uncharacterized serine/threonine-protein kinase SBK3	2.01467	-1.21272	0.399027	-2.7215	0.00649871	0.0227597
ENSMUSG00000033740	St18	protein_coding	1	suppression of tumorigenicity 18	14.7494	-1.21061	0.339038	-3.4864	0.000489566	0.00230289
ENSMUSG00000041347	Bdkrb1	protein_coding	12	B1 bradykinin receptor	76.728	-1.20989	0.17508	-6.86832	6.49602e-12	1.00181e-10
ENSMUSG00000087064	Sap30bpos	antisense	11	SAP30 binding protein, opposite strand	9.58557	-1.20947	0.396474	-2.91165	0.0035953	0.0136607
ENSMUSG00000070564	Ntn5	protein_coding	7	Netrin-5	18.5078	-1.2085	0.334193	-3.50313	0.000459825	0.00217642
ENSMUSG00000040666	Sh3bgr	protein_coding	16	SH3 domain-binding glutamic acid-rich protein	205.654	-1.20786	0.131383	-9.17734	4.41865e-20	1.25026e-18
ENSMUSG00000024471	Myot	protein_coding	18	myotilin	7.54513	-1.20635	0.40569	-2.85041	0.00436623	0.0161795
ENSMUSG00000026494	Kif26b	protein_coding	1	Kinesin-like protein KIF26B	113.554	-1.20504	0.187801	-6.40847	1.46986e-10	1.99699e-09
ENSMUSG00000110697	Gm31718	lincRNA	8	predicted gene, 31718	6.31122	-1.20409	0.40767	-2.87192	0.0040799	0.0152295
ENSMUSG00000050370	Ch25h	protein_coding	19	Cholesterol 25-hydroxylase	11.7186	-1.20373	0.347814	-3.30001	0.000966813	0.00427461
ENSMUSG00000001270	Ckb	protein_coding	12	Creatine kinase B-type	1663.27	-1.19611	0.0613343	-19.4988	1.12431e-84	1.46238e-82
ENSMUSG00000060675	Pla2g16	protein_coding	19	HRAS-like suppressor 3	950.456	-1.19234	0.0863167	-13.8105	2.2029e-43	1.38956e-41
ENSMUSG00000051669	AU021092	protein_coding	16	UPF0764	24.4163	-1.18846	0.298541	-3.93189	8.42793e-05	0.000474061
ENSMUSG00000044033	Ccdc141	protein_coding	2	coiled-coil domain containing 141	7278.38	-1.18815	0.0540492	-21.9822	4.26537e-107	7.86469e-105
ENSMUSG00000048895	Cdk5r1	protein_coding	11	Cyclin-dependent kinase 5 activator 1 Cyclin-dependent kinase 5 activator 1, p35 Cyclin-dependent kinase 5 activator 1, p25	416.532	-1.18538	0.0851395	-13.9102	5.4961e-44	3.50643e-42
ENSMUSG00000025330	Padi4	protein_coding	4	Protein-arginine deiminase type-4	3.59402	-1.18123	0.404005	-3.31336	0.000921838	0.00409627
ENSMUSG00000021751	Acox2	protein_coding	14	Peroxisomal acyl-coenzyme A oxidase 2	7.45274	-1.17589	0.390462	-2.83735	0.004549	0.0167496
ENSMUSG00000021182	Ccdc88c	protein_coding	12	Protein Daple	648.901	-1.17383	0.0867368	-13.5279	1.06978e-41	6.48006e-40
ENSMUSG00000116237	AC109617.2	lincRNA	15		31.2783	-1.17298	0.271041	-4.27097	1.94628e-05	0.000124548
ENSMUSG00000108161	Gm32914	lincRNA	6	predicted gene, 32914	28.1914	-1.17126	0.269982	-4.27822	1.88395e-05	0.000120744
ENSMUSG00000040289	Hey1	protein_coding	3	hes related family bHLH transcription factor with YRPW motif 1	749.906	-1.17114	0.0661222	-17.702	4.04704e-70	4.14056e-68
ENSMUSG00000025141	Myadml2	protein_coding	11	Myeloid-associated differentiation marker-like protein 2	3.64525	-1.17055	0.408651	-3.37627	0.000734746	0.00332299
ENSMUSG00000040680	Kremen2	protein_coding	17	Kremen protein 2	2.44271	-1.17005	0.399694	-3.21142	0.00132082	0.00562346
ENSMUSG00000031385	Plxnb3	protein_coding	X	Plexin-B3	49.1442	-1.16992	0.206214	-5.60057	2.13649e-08	2.20077e-07
ENSMUSG00000085912	Trp53cor1	lincRNA	17	tumor protein p53 pathway corepressor 1	47.2927	-1.16896	0.229228	-5.0718	3.94072e-07	3.35641e-06
ENSMUSG00000033022	Cdo1	protein_coding	18	Cysteine dioxygenase type 1	4.67565	-1.16592	0.407375	-2.6593	0.0078303	0.0267205
ENSMUSG00000049719	Prss46	protein_coding	9	Serine protease 46	4.5335	-1.16589	0.411776	-2.62674	0.00862063	0.0290336
ENSMUSG00000090066	1110002E22Rik	protein_coding	3	RIKEN cDNA 1110002E22 gene	1613.92	-1.16567	0.0853592	-13.6548	1.89121e-42	1.17095e-40
ENSMUSG00000040747	Cd53	protein_coding	3	Leukocyte surface antigen CD53	97.6262	-1.1652	0.16475	-7.04633	1.83692e-12	3.02174e-11
ENSMUSG00000031673	Cdh11	protein_coding	8	Cadherin-11	239.469	-1.16138	0.128164	-9.04515	1.49466e-19	4.10457e-18
ENSMUSG00000071265	1700086L19Rik	transcribed_unitary_pseudogene	12		6.80576	-1.16132	0.406197	-2.80536	0.00502608	0.0182223
ENSMUSG00000056445	Hoxaas2	processed_transcript	6		7.83231	-1.16121	0.389038	-2.91401	0.00356821	0.0135701
ENSMUSG00000097271	Gm9903	protein_coding	5	predicted gene 9903	6.49007	-1.15969	0.393584	-2.84489	0.00444268	0.0164157
ENSMUSG00000048827	Pkd1l3	protein_coding	8	Polycystic kidney disease protein 1-like 3	2.03014	-1.15746	0.388955	-3.10046	0.00193223	0.00788829
ENSMUSG00000030351	Tspan11	protein_coding	6	Tetraspanin-11	20.7657	-1.1572	0.291715	-3.87807	0.000105287	0.000580361
ENSMUSG00000022075	Rhobtb2	protein_coding	14	Rho-related BTB domain-containing protein 2	1121.14	-1.15683	0.0762891	-15.1607	6.4416e-52	4.82516e-50
ENSMUSG00000086474	9130204K15Rik	lincRNA	11	RIKEN cDNA 9130204K15 gene	5.66934	-1.15594	0.407939	-2.62375	0.00869668	0.0292604
ENSMUSG00000025328	Padi3	protein_coding	4	Protein-arginine deiminase type-3	15.702	-1.15521	0.357582	-3.18132	0.00146606	0.00617911
ENSMUSG00000052572	Dlg2	protein_coding	7	Disks large homolog 2	15.2227	-1.1544	0.34391	-3.27734	0.00104791	0.00458371
ENSMUSG00000022218	Tgm1	protein_coding	14	transglutaminase 1	8.34904	-1.15252	0.395198	-2.77193	0.00557258	0.0199248
ENSMUSG00000030409	Dmpk	protein_coding	7	Myotonin-protein kinase	2463.74	-1.15203	0.0492965	-23.3677	9.11295e-121	2.01192e-118
ENSMUSG00000058975	Kcnc1	protein_coding	7	Potassium voltage-gated channel subfamily C member 1	2.16236	-1.15094	0.389038	-3.09748	0.00195172	0.00795626
ENSMUSG00000027233	Patl2	protein_coding	2	2	3.53338	-1.14995	0.410891	-2.51419	0.0119306	0.0382832
ENSMUSG00000110440	Gm45894	antisense	8	predicted gene 45894	4.81857	-1.14795	0.410529	-2.6879	0.00719025	0.0248241
ENSMUSG00000025170	Rab40b	protein_coding	11	Rab40B, member RAS oncogene family	269.489	-1.14677	0.112705	-10.158	3.05198e-24	1.07132e-22
ENSMUSG00000046856	Gpr1	protein_coding	1	G-protein coupled receptor 1	2.65237	-1.14642	0.407442	-2.41951	0.0155414	0.0479708
ENSMUSG00000028370	Pappa	protein_coding	4	Pappalysin-1	57.8505	-1.14595	0.231001	-4.94794	7.50024e-07	6.12988e-06
ENSMUSG00000026051	1500015O10Rik	protein_coding	1	RIKEN cDNA 1500015O10 gene	4.20215	-1.14591	0.409529	-3.37687	0.000733147	0.00331666
ENSMUSG00000042529	Kcnj12	protein_coding	11	ATP-sensitive inward rectifier potassium channel 12	42.0868	-1.14589	0.274527	-4.1789	2.92922e-05	0.000180365
ENSMUSG00000110340	1600027J07Rik	lincRNA	8	RIKEN cDNA 1600027J07 gene	3.33841	-1.14516	0.408809	-2.74953	0.00596807	0.0211709
ENSMUSG00000086513	9130208D14Rik	unprocessed_pseudogene	7	RIKEN cDNA 9130208D14 gene	2.9436	-1.14465	0.409125	-2.51048	0.0120567	0.0385846
ENSMUSG00000034457	Eda2r	protein_coding	X	Tumor necrosis factor receptor superfamily member 27	2437.05	-1.1444	0.0754396	-15.169	5.6743e-52	4.26946e-50
ENSMUSG00000038400	Pmepa1	protein_coding	2	prostate transmembrane protein, androgen induced 1	1719.18	-1.14389	0.0702758	-16.2777	1.42112e-59	1.23549e-57
ENSMUSG00000108015	Gm32591	lincRNA	6	predicted gene, 32591	2.54175	-1.14234	0.399251	-3.18583	0.00144338	0.00609577
ENSMUSG00000020173	Cobl	protein_coding	11	Protein cordon-bleu	532	-1.13895	0.0885372	-12.8566	7.89937e-38	4.47782e-36
ENSMUSG00000017493	Igfbp4	protein_coding	11	Insulin-like growth factor-binding protein 4	487.436	-1.13575	0.0991773	-11.4414	2.59527e-30	1.15507e-28
ENSMUSG00000085781	Gm15640	antisense	16	predicted gene 15640	5.18085	-1.13495	0.40981	-2.69949	0.00694458	0.0240949
ENSMUSG00000021404	Serpinb9c	protein_coding	13	serine (or cysteine) peptidase inhibitor, clade B, member 9c	5.24371	-1.13482	0.408909	-2.68897	0.00716724	0.02476
ENSMUSG00000032717	Mdfi	protein_coding	17	MyoD family inhibitor	12.3872	-1.13112	0.355979	-3.12211	0.00179561	0.0074044
ENSMUSG00000027107	Chrna1	protein_coding	2	cholinergic receptor, nicotinic, alpha polypeptide 1 (muscle)	12457.9	-1.13009	0.0438342	-25.7808	1.45526e-146	4.52182e-144
ENSMUSG00000044041	Krt13	protein_coding	11	Keratin, type I cytoskeletal 13	140.448	-1.12958	0.137184	-8.1945	2.51638e-16	5.64469e-15
ENSMUSG00000030693	Klk10	protein_coding	7	kallikrein related peptidase 10	5.50378	-1.12956	0.408575	-2.64095	0.00826739	0.0280353
ENSMUSG00000097516	4930467D21Rik	lincRNA	5	RIKEN cDNA 4930467D21 gene	6.61264	-1.12879	0.392774	-2.72696	0.00639201	0.0224375
ENSMUSG00000097993	Ptprv	processed_transcript	1		84.8254	-1.12704	0.167872	-6.6771	2.43717e-11	3.56524e-10
ENSMUSG00000008845	Cd163	protein_coding	6	Scavenger receptor cysteine-rich type 1 protein M130 Soluble CD163	5.74995	-1.1256	0.407578	-2.67105	0.00756152	0.0259352
ENSMUSG00000034813	Grip1	protein_coding	10	Glutamate receptor-interacting protein 1	27.0286	-1.12508	0.280164	-3.96571	7.3178e-05	0.000417353
ENSMUSG00000081611	Gm13651	processed_pseudogene	2	predicted gene 13651	3.02394	-1.12382	0.412026	-2.49105	0.0127366	0.040429
ENSMUSG00000108801	Gm39090	lincRNA	7	predicted gene, 39090	46.8502	-1.12364	0.238165	-4.71601	2.40511e-06	1.82109e-05
ENSMUSG00000037913	Tmem156	protein_coding	5	transmembrane protein 156	4.91018	-1.12287	0.410424	-2.62478	0.00867039	0.0291778
ENSMUSG00000107696	Gm44171	TEC	6	predicted gene, 44171	24.8858	-1.1216	0.29864	-3.69698	0.000218179	0.00111781
ENSMUSG00000057606	Colq	protein_coding	14	Acetylcholinesterase collagenic tail peptide	10.1959	-1.1211	0.396339	-2.80038	0.00510422	0.0184776
ENSMUSG00000047495	Dlgap2	protein_coding	8	Disks large-associated protein 2	4.03454	-1.11874	0.409378	-2.50342	0.0123001	0.0392611
ENSMUSG00000038963	Slco4a1	protein_coding	2	Mus musculus solute carrier organic anion transporter family, member 4a1 (Slco4a1), transcript variant 2, mRNA.	26.8539	-1.11795	0.273736	-3.98965	6.61696e-05	0.000380646
ENSMUSG00000024042	Sik1	protein_coding	17	Serine/threonine-protein kinase SIK1	899.723	-1.11638	0.0762628	-14.6358	1.6604e-48	1.1805e-46
ENSMUSG00000038086	Hspb2	protein_coding	9	Heat shock protein beta-2	371.509	-1.11561	0.100619	-11.077	1.62281e-28	6.7903e-27
ENSMUSG00000050505	Pcdh20	protein_coding	14	Protocadherin-20	5.46764	-1.11533	0.399328	-2.56613	0.0102841	0.0337356
ENSMUSG00000030263	Lrmp	protein_coding	6	lymphoid-restricted membrane protein isoform 2	3.2637	-1.11461	0.411478	-2.42047	0.0155002	0.047879
ENSMUSG00000003051	Elf3	protein_coding	1	ETS-related transcription factor Elf-3	2.59874	-1.11108	0.392472	-3.05382	0.00225944	0.00906098
ENSMUSG00000001864	Aif1l	protein_coding	2	Allograft inflammatory factor 1-like	3534.09	-1.11105	0.0651236	-17.0608	2.90548e-65	2.85094e-63
ENSMUSG00000111816	Gm7229	unprocessed_pseudogene	9	predicted gene 7229	3.87981	-1.10941	0.412139	-2.46256	0.0137948	0.0432723
ENSMUSG00000113184	AC125351.1	lincRNA	12		3.65549	-1.10917	0.412424	-2.51276	0.0119792	0.0383687
ENSMUSG00000029659	Medag	protein_coding	5	Mus musculus mesenteric estrogen dependent adiposis (Medag), transcript variant 2, mRNA.	625.834	-1.10614	0.0757314	-14.5964	2.96241e-48	2.09731e-46
ENSMUSG00000045667	Smtnl2	protein_coding	11	Smoothelin-like protein 2	5.17908	-1.10592	0.41174	-2.57652	0.00997994	0.0328926
ENSMUSG00000069227	Gprin1	protein_coding	13	G protein-regulated inducer of neurite outgrowth 1	64.6409	-1.10581	0.190382	-5.77831	7.54544e-09	8.22645e-08
ENSMUSG00000086392	Mccc1os	antisense	3		5.55339	-1.10546	0.405022	-2.57652	0.00998012	0.0328926
ENSMUSG00000031785	Adgrg1	protein_coding	8	Adhesion G-protein coupled receptor G1 ADGRG1 N-terminal fragment ADGRG1 C-terminal fragment	128.255	-1.10407	0.16955	-6.50295	7.87575e-11	1.09757e-09
ENSMUSG00000054871	Tmem158	protein_coding	9	transmembrane protein 158	221.076	-1.10216	0.164652	-6.69315	2.18417e-11	3.20912e-10
ENSMUSG00000081111	Gm5913	processed_pseudogene	8	predicted gene 5913	7.98737	-1.10028	0.387415	-2.80898	0.00496993	0.0180499
ENSMUSG00000027508	Pag1	protein_coding	3	phosphoprotein associated with glycosphingolipid microdomains 1	151.203	-1.10011	0.124149	-8.84027	9.54888e-19	2.4879e-17
ENSMUSG00000031609	Sap30	protein_coding	8	Histone deacetylase complex subunit SAP30	674.451	-1.09913	0.0743789	-14.7709	2.25649e-49	1.64616e-47
ENSMUSG00000038515	Grtp1	protein_coding	8	Growth hormone-regulated TBC protein 1	253.49	-1.09875	0.109182	-10.0536	8.85491e-24	3.0446e-22
ENSMUSG00000115494	AC158981.1	lincRNA	14		13.9519	-1.09837	0.331722	-3.23901	0.00119947	0.00516445
ENSMUSG00000006576	Slc4a3	protein_coding	1	solute carrier family 4 (anion exchanger), member 3	638.464	-1.09807	0.0926793	-11.8436	2.32374e-32	1.12688e-30
ENSMUSG00000082715	Gm11633	processed_pseudogene	11	predicted gene 11633	3.14611	-1.0979	0.412511	-2.41906	0.0155608	0.0480087
ENSMUSG00000074577	Ripor3	protein_coding	2	RIPOR family member 3	30.7184	-1.09758	0.260934	-4.16207	3.15379e-05	0.000192848
ENSMUSG00000040260	Daam2	protein_coding	17	Disheveled-associated activator of morphosis 2	293.395	-1.09651	0.112326	-9.74646	1.91015e-22	6.15171e-21
ENSMUSG00000027520	Zdbf2	protein_coding	1	zinc finger, DBF-type containing 2	5.31327	-1.09576	0.41039	-2.58823	0.00964719	0.0319712
ENSMUSG00000041920	Slc16a6	protein_coding	11	solute carrier family 16 (monocarboxylic acid transporters), member 6	13.1506	-1.09552	0.349841	-3.11973	0.0018102	0.00745357
ENSMUSG00000038295	Atg9b	protein_coding	5	Autophagy-related protein 9B	50.0512	-1.09527	0.235516	-4.65138	3.29724e-06	2.4372e-05
ENSMUSG00000104453	Gm37829	TEC	7	predicted gene, 37829	3.83215	-1.09347	0.411285	-2.44097	0.0146478	0.0456154
ENSMUSG00000038271	Iffo1	protein_coding	6	Intermediate filament family orphan 1	2793.43	-1.09046	0.0665256	-16.391	2.21606e-60	1.95702e-58
ENSMUSG00000103966	Gm37120	TEC	1	predicted gene, 37120	2.90729	-1.09024	0.406335	-2.35045	0.0187508	0.0561496
ENSMUSG00000025610	Map3k7cl	protein_coding	16	MAP3K7 C-terminal-like protein	61.2962	-1.08418	0.210683	-5.12962	2.90327e-07	2.51752e-06
ENSMUSG00000037206	Islr	protein_coding	9	Immunoglobulin superfamily containing leucine-rich repeat protein	1135.5	-1.08368	0.0881276	-12.2939	9.76776e-35	5.0741e-33
ENSMUSG00000021259	Cyp46a1	protein_coding	12	Cholesterol 24-hydroxylase	43.726	-1.08244	0.230397	-4.66674	3.06011e-06	2.27596e-05
ENSMUSG00000086839	Gm11973	antisense	11	predicted gene 11973	5.7807	-1.08228	0.402001	-2.61134	0.00901884	0.0301384
ENSMUSG00000071478	Hist1h2ad	protein_coding	13	Histone H2A type 1-B	179.194	-1.07938	0.232212	-4.63584	3.55485e-06	2.6138e-05
ENSMUSG00000015950	Ncf1	protein_coding	5	Neutrophil cytosol factor 1	9.80743	-1.07843	0.377338	-2.78868	0.00529227	0.0190567
ENSMUSG00000107176	Gm9794	processed_pseudogene	6	predicted pseudogene 9794	35.6178	-1.0774	0.249415	-4.29341	1.7595e-05	0.000113461
ENSMUSG00000026532	Spta1	protein_coding	1	Spectrin alpha chain, erythrocytic 1	6.36826	-1.07709	0.409991	-3.2406	0.00119279	0.00513967
ENSMUSG00000031543	Ank1	protein_coding	8	Ankyrin-1	897.342	-1.07705	0.0713407	-15.0929	1.80399e-51	1.33344e-49
ENSMUSG00000040380	Cbln3	protein_coding	14	Cerebellin-3	5.64123	-1.07682	0.404838	-2.5513	0.0107321	0.0350818
ENSMUSG00000090021	Gm6493	unprocessed_pseudogene	16	predicted gene 6493	8.93406	-1.07671	0.361267	-2.87958	0.00398208	0.0149308
ENSMUSG00000073680	Tmem88b	protein_coding	4	Transmembrane protein 88B	17.2104	-1.07547	0.323172	-3.29731	0.000976174	0.00431146
ENSMUSG00000114579	Gm4130	processed_pseudogene	13	predicted gene 4130	2.89102	-1.072	0.412203	-2.33987	0.0192904	0.0574602
ENSMUSG00000058625	Gm17383	pseudogene	18	predicted gene, 17383	2.07264	-1.07191	0.400206	-2.27685	0.0227953	0.065968
ENSMUSG00000041771	Slc24a4	protein_coding	12	solute carrier family 24 (sodium/potassium/calcium exchanger), member 4	3.12494	-1.06786	0.4057	-2.61816	0.00884062	0.0296733
ENSMUSG00000034161	Scx	protein_coding	15	scleraxis	2516.69	-1.06597	0.0598834	-17.8007	6.98284e-71	7.23241e-69
ENSMUSG00000065501	Mir335	miRNA	6	microRNA 335	5.31887	-1.06571	0.408397	-2.60628	0.0091532	0.030527
ENSMUSG00000015365	Mov10l1	protein_coding	15	Mov10 RISC complex RNA helicase like 1	2.59326	-1.0653	0.399335	-3.08229	0.00205415	0.00832327
ENSMUSG00000025789	St8sia2	protein_coding	7	Alpha-2,8-sialyltransferase 8B	4.73568	-1.06034	0.409945	-2.51458	0.0119174	0.0382484
ENSMUSG00000023473	Celsr3	protein_coding	9	Cadherin EGF LAG seven-pass G-type receptor 3	4.11188	-1.0598	0.411917	-2.3409	0.0192375	0.0573537
ENSMUSG00000024593	Megf10	protein_coding	18	Multiple epidermal growth factor-like domains protein 10	3113.66	-1.05942	0.0721266	-14.6881	7.68368e-49	5.48615e-47
ENSMUSG00000049871	Nlrc3	protein_coding	16	Protein NLRC3	30.1804	-1.05857	0.253906	-4.12471	3.71205e-05	0.000224206
ENSMUSG00000091712	Sec14l5	protein_coding	16	SEC14-like lipid binding 5	4.09537	-1.05528	0.411251	-2.69794	0.0069771	0.0241878
ENSMUSG00000056270	Prr9	protein_coding	3	Proline-rich protein 9	5.19816	-1.05456	0.405119	-2.49021	0.0127668	0.0405171
ENSMUSG00000026875	Traf1	protein_coding	2	TNF receptor-associated factor 1	26.9162	-1.0535	0.275899	-3.78018	0.000156713	0.000831066
ENSMUSG00000103409	Lsmem2	lincRNA	9	leucine-rich single-pass membrane protein 2	4.04311	-1.05141	0.412166	-2.44339	0.0145499	0.0453274
ENSMUSG00000032511	Scn5a	protein_coding	9	Sodium channel protein type 5 subunit alpha	946.376	-1.05102	0.0955038	-11.0067	3.54607e-28	1.45832e-26
ENSMUSG00000020583	Matn3	protein_coding	12	Matrilin-3	9.40631	-1.05065	0.386105	-2.70571	0.00681594	0.0236878
ENSMUSG00000083567	Gm11451	processed_pseudogene	2	predicted gene 11451	21.9449	-1.05004	0.289246	-3.58715	0.000334309	0.00163491
ENSMUSG00000015243	Abca1	protein_coding	4	ATP-binding cassette, sub-family A (ABC1), member 1	44.3543	-1.04838	0.203581	-5.0911	3.55993e-07	3.05222e-06
ENSMUSG00000058248	Kcnh1	protein_coding	1	potassium voltage-gated channel subfamily H member 1	15.8677	-1.04714	0.362571	-2.96278	0.00304871	0.0117813
ENSMUSG00000071392	Ect2l	protein_coding	10	epithelial cell transforming 2 like	3.62987	-1.04505	0.411584	-2.41223	0.0158554	0.0486892
ENSMUSG00000020646	Mboat2	protein_coding	12	Lysophospholipid acyltransferase 2	393.001	-1.04442	0.0975016	-10.7056	9.58285e-27	3.78331e-25
ENSMUSG00000032845	Alpk2	protein_coding	18	Alpha-protein kinase 2	202.043	-1.04379	0.119174	-8.74775	2.17656e-18	5.57566e-17
ENSMUSG00000105355	Gm40117	antisense	3	predicted gene, 40117	4.00419	-1.04108	0.412287	-2.43562	0.0148662	0.046225
ENSMUSG00000046312	AI464131	protein_coding	4	Myosis-regulating glycosidase	1096.36	-1.04077	0.0734359	-14.17	1.40415e-45	9.31232e-44
ENSMUSG00000029298	Gbp9	protein_coding	5		34.8631	-1.04057	0.247991	-4.14434	3.40787e-05	0.000207101
ENSMUSG00000099997	Tubb4b-ps2	processed_pseudogene	1	tubulin, beta 4B class IVB, pseudogene 2	3.00928	-1.04033	0.411033	-2.34064	0.0192506	0.0573825
ENSMUSG00000034607	Pof1b	protein_coding	X	Protein POF1B	7.22798	-1.04026	0.391999	-2.58599	0.00970984	0.0321281
ENSMUSG00000058925	1700011I03Rik	protein_coding	18	RIKEN cDNA 1700011I03 gene	1.91915	-1.03845	0.382363	-2.87598	0.00402778	0.0150719
ENSMUSG00000071042	Rasgrp3	protein_coding	17	RAS, guanyl releasing protein 3	5.42946	-1.03836	0.405619	-2.50957	0.0120877	0.0386765
ENSMUSG00000032327	Stra6	protein_coding	9	stimulated by retinoic acid gene 6	14.5316	-1.03681	0.32004	-3.15212	0.0016209	0.00675704
ENSMUSG00000078956	Gm14221	lincRNA	2	predicted gene 14221	45.3418	-1.03681	0.212278	-4.8425	1.28217e-06	1.01288e-05
ENSMUSG00000030557	Mef2a	protein_coding	7	Mus musculus myocyte enhancer factor 2A (Mef2a), transcript variant 7, mRNA.	3664.34	-1.03635	0.0660021	-15.7013	1.48264e-55	1.17345e-53
ENSMUSG00000001930	Vwf	protein_coding	6	Von Willebrand factor	4.71224	-1.03583	0.410197	-2.41365	0.0157935	0.0485256
ENSMUSG00000036158	Prickle1	protein_coding	15	Prickle-like protein 1	401.336	-1.03558	0.087379	-11.8427	2.34811e-32	1.13215e-30
ENSMUSG00000027470	Mylk2	protein_coding	2	Myosin light chain kinase 2, skeletal/cardiac muscle	133.343	-1.03444	0.132588	-7.78054	7.22181e-15	1.47414e-13
ENSMUSG00000115326	AC125328.1	lincRNA	15		175.154	-1.034	0.245123	-4.21024	2.55095e-05	0.000159117
ENSMUSG00000020032	Nuak1	protein_coding	10	NUAK family SNF1-like kinase 1	741.867	-1.03309	0.0889573	-11.6121	3.57815e-31	1.64038e-29
ENSMUSG00000028640	Tfap2c	protein_coding	2	transcription factor AP-2, gamma	4.97481	-1.03068	0.405983	-2.34889	0.0188293	0.0563467
ENSMUSG00000056880	Gadl1	protein_coding	9	glutamate decarboxylase like 1	3.44267	-1.02977	0.401214	-3.02485	0.00248755	0.00986729
ENSMUSG00000073002	Vamp5	protein_coding	6	vesicle-associated membrane protein 5	761.86	-1.02975	0.101392	-10.1555	3.1328e-24	1.0974e-22
ENSMUSG00000097487	Ptges3l	protein_coding	11	Putative protein PTGES3L	147.444	-1.02935	0.137248	-7.48819	6.98294e-14	1.315e-12
ENSMUSG00000021390	Ogn	protein_coding	13	osteoglycin	14382.4	-1.02877	0.0473299	-21.7357	9.43831e-105	1.70285e-102
ENSMUSG00000020774	Aspa	protein_coding	11	aspartoacylase	88.2606	-1.02704	0.18342	-5.58191	2.37893e-08	2.43539e-07
ENSMUSG00000026479	Lamc2	protein_coding	1	laminin subunit gamma 2	578.032	-1.02673	0.0853273	-12.0297	2.48078e-33	1.23151e-31
ENSMUSG00000067344	Rps25-ps1	processed_pseudogene	6	ribosomal protein S25, pseudogene 1	7.75084	-1.02618	0.388255	-2.63575	0.00839512	0.0283881
ENSMUSG00000020598	Nrcam	protein_coding	12	Neuronal cell adhesion molecule	10.4826	-1.0259	0.371803	-2.71754	0.00657697	0.0229954
ENSMUSG00000016758	Bik	protein_coding	15	Bcl-2-interacting killer	51.1745	-1.02265	0.21937	-4.64203	3.45e-06	2.54228e-05
ENSMUSG00000085939	Cd63-ps	transcribed_processed_pseudogene	18	CD63 antigen, pseudogene	29.9281	-1.02251	0.268252	-3.78494	0.000153748	0.00081689
ENSMUSG00000024743	Syt7	protein_coding	19	Synaptotagmin-7	8.02398	-1.02242	0.385544	-2.5509	0.0107446	0.0351067
ENSMUSG00000082579	Gm11979	processed_pseudogene	11	predicted gene 11979	2.86499	-1.02183	0.410074	-2.30985	0.0208967	0.0614378
ENSMUSG00000036390	Gadd45a	protein_coding	6	Growth arrest and DNA damage-inducible protein GADD45 alpha	1840.78	-1.02175	0.0736964	-13.8635	1.05421e-43	6.7002e-42
ENSMUSG00000025272	Tro	protein_coding	X	trophinin	18.492	-1.0205	0.325548	-3.07813	0.00208304	0.00842029
ENSMUSG00000024597	Slc12a2	protein_coding	18	solute carrier family 12 member 2	1192.56	-1.02017	0.0801475	-12.7274	4.16219e-37	2.3125e-35
ENSMUSG00000078247	Airn	antisense	17	antisense Igf2r RNA	36.4723	-1.01922	0.236221	-4.28206	1.8517e-05	0.000118859
ENSMUSG00000034659	Tmem109	protein_coding	19	Transmembrane protein 109	2022.34	-1.01873	0.0485178	-20.9956	7.19922e-98	1.15044e-95
ENSMUSG00000100702	Gm8976	processed_pseudogene	1	predicted gene 8976	4.90447	-1.01818	0.405979	-2.40305	0.0162589	0.0496646
ENSMUSG00000053909	Rhox10	protein_coding	X		3.72651	-1.01722	0.403714	-3.04128	0.00235576	0.00939654
ENSMUSG00000058145	Adamts17	protein_coding	7	a disintegrin-like and metallopeptidase (reprolysin type) with thrombospondin type 1 motif, 17	4.42428	-1.01649	0.412417	-2.39151	0.016779	0.0509751
ENSMUSG00000009210	Prr29	protein_coding	11	Proline-rich protein 29	3.31889	-1.016	0.399087	-2.99306	0.00276196	0.0108126
ENSMUSG00000028158	Mttp	protein_coding	3	Microsomal triglyceride transfer protein large subunit	272.641	-1.01574	0.140068	-7.2477	4.23917e-13	7.34045e-12
ENSMUSG00000016024	Lbp	protein_coding	2	Lipopolysaccharide-binding protein	3.55865	-1.01403	0.409772	-2.40159	0.0163241	0.0498186
ENSMUSG00000097248	Gm2694	lincRNA	8	predicted gene 2694	14.8235	-1.01192	0.336339	-2.94658	0.00321307	0.0123482
ENSMUSG00000048096	Lmod1	protein_coding	1	leiomodin 1	117.1	-1.00878	0.157512	-6.38578	1.70524e-10	2.30929e-09
ENSMUSG00000097666	A330094K24Rik	lincRNA	18	RIKEN cDNA A330094K24 gene	2.30543	-1.00818	0.405756	-2.24956	0.0244768	0.0699414
ENSMUSG00000032776	Mctp2	protein_coding	7	Multiple C2 and transmembrane domain-containing protein 2	22.0989	-1.00542	0.280145	-3.53451	0.000408532	0.00195906
ENSMUSG00000007033	Hspa1l	protein_coding	17	Heat shock 70 kDa protein 1-like	40.1362	-1.00532	0.214105	-4.65406	3.2546e-06	2.40674e-05
ENSMUSG00000107768	Gm44275	lincRNA	6	predicted gene, 44275	32.814	-1.0043	0.269	-3.70133	0.000214474	0.00110118
ENSMUSG00000044751	Gm12231	processed_pseudogene	11	predicted gene 12231	11.0169	-1.00256	0.362813	-2.74268	0.00609395	0.0215083
ENSMUSG00000001508	Sgca	protein_coding	11	Alpha-sarcoglycan	457.622	-1.00212	0.0832722	-12.0252	2.6198e-33	1.29668e-31
ENSMUSG00000022105	Rb1	protein_coding	14	Retinoblastoma-associated protein	1780.31	-1.00188	0.0619265	-16.1775	7.27003e-59	6.22367e-57
ENSMUSG00000042734	Ttc9	protein_coding	12	tetratricopeptide repeat domain 9	1390.37	-0.999532	0.0592658	-16.8635	8.34746e-64	7.86865e-62
ENSMUSG00000042826	Fgf11	protein_coding	11	Fibroblast growth factor 11	328.139	-0.999376	0.0955516	-10.4508	1.45301e-25	5.44199e-24
ENSMUSG00000036782	Klhl13	protein_coding	X	Kelch-like protein 13	1082.82	-0.997222	0.0729961	-13.6594	1.77527e-42	1.10323e-40
ENSMUSG00000097892	Gm26801	antisense	1	predicted gene, 26801	7.00564	-0.996727	0.395425	-2.4579	0.0139754	0.0437568
ENSMUSG00000031508	Ankrd10	protein_coding	8	Ankyrin repeat domain-containing protein 10	1487.35	-0.994375	0.0691364	-14.3813	6.78202e-47	4.64472e-45
ENSMUSG00000019933	Mrln	protein_coding	10	Myoregulin	136.55	-0.992196	0.15145	-6.53632	6.30493e-11	8.88995e-10
ENSMUSG00000035268	Pkig	protein_coding	2	cAMP-dependent protein kinase inhibitor gamma	2646.03	-0.991847	0.0634829	-15.623	5.07832e-55	3.96321e-53
ENSMUSG00000113211	4921525O09Rik	processed_transcript	13	RIKEN cDNA 4921525O09 gene	27.1983	-0.99118	0.287472	-3.43707	0.000588051	0.00270846
ENSMUSG00000026542	Apcs	protein_coding	1	serum amyloid P-component	4.46383	-0.991144	0.409282	-3.09688	0.00195571	0.00796863
ENSMUSG00000030000	Add2	protein_coding	6	Beta-adducin	256.248	-0.990343	0.113432	-8.71928	2.79979e-18	7.11784e-17
ENSMUSG00000063684	Gm13910	processed_pseudogene	2	predicted gene 13910	19.5169	-0.990122	0.301051	-3.26385	0.00109909	0.0047801
ENSMUSG00000032366	Tpm1	protein_coding	9	tropomyosin 1, alpha	21577.2	-0.989695	0.0532536	-18.5847	4.27364e-77	4.81258e-75
ENSMUSG00000032942	Ucp3	protein_coding	7	uncoupling protein 3 (mitochondrial, proton carrier)	5.19996	-0.989652	0.407832	-2.33165	0.0197191	0.0585398
ENSMUSG00000021895	Arhgef3	protein_coding	14	Rho guanine nucleotide exchange factor 3	269.454	-0.98647	0.100327	-9.82351	8.91796e-23	2.94556e-21
ENSMUSG00000035105	Egln3	protein_coding	12	egl-9 family hypoxia inducible factor 3	565.418	-0.982799	0.0870468	-11.2851	1.55502e-29	6.79469e-28
ENSMUSG00000099104	Gm17087	protein_coding	17		15.061	-0.982005	0.319334	-2.99856	0.00271261	0.0106567
ENSMUSG00000058260	Serpina9	protein_coding	12	serine (or cysteine) peptidase inhibitor, clade A (alpha-1 antiproteinase, antitrypsin), member 9	3.1734	-0.978653	0.404256	-2.44702	0.0144042	0.0449152
ENSMUSG00000047746	Fbxo40	protein_coding	16	Mus musculus F-box protein 40 (Fbxo40), transcript variant 1, mRNA.	12.7934	-0.976883	0.362148	-2.67002	0.00758474	0.0260042
ENSMUSG00000105302	Gm19817	TEC	3		5.0106	-0.975637	0.404669	-2.28893	0.0220834	0.064327
ENSMUSG00000059256	Gzmd	protein_coding	14	Granzyme D	9.16352	-0.975153	0.387614	-2.52485	0.0115749	0.0372846
ENSMUSG00000024885	Aldh3b1	protein_coding	19	Aldehyde dehydrogenase family 3 member B1	981.404	-0.974803	0.0864551	-11.2733	1.77807e-29	7.74917e-28
ENSMUSG00000058252	Tcp11x2	protein_coding	X	t-complex 11 family, X-linked 2	35.3341	-0.973836	0.251027	-3.8381	0.000123991	0.000672194
ENSMUSG00000047343	Mettl21c	protein_coding	1	Protein-lysine methyltransferase METTL21C	2.10003	-0.973225	0.385594	-2.7975	0.00515002	0.0186389
ENSMUSG00000018566	Slc2a4	protein_coding	11	solute carrier family 2 (facilitated glucose transporter), member 4	21.5981	-0.970306	0.278346	-3.4084	0.000653444	0.00298263
ENSMUSG00000047104	Pbp2	protein_coding	6		4.32618	-0.969249	0.41115	-2.28404	0.0223692	0.0649928
ENSMUSG00000005611	Mrvi1	protein_coding	7	Protein MRVI1	3.12937	-0.967441	0.405223	-2.44751	0.0143849	0.0448714
ENSMUSG00000029490	Mfsd7a	protein_coding	5	Major facilitator superfamily domain-containing protein 7	138.067	-0.967387	0.16304	-5.93521	2.93462e-09	3.38884e-08
ENSMUSG00000026202	Tuba4a	protein_coding	1	tubulin, alpha 4A	2147.73	-0.966591	0.0631642	-15.3028	7.32494e-53	5.63785e-51
ENSMUSG00000057897	Camk2b	protein_coding	11	Calcium/calmodulin-dependent protein kinase type II subunit beta	16.8444	-0.965129	0.357042	-2.66594	0.0076773	0.0262839
ENSMUSG00000104830	5830487J09Rik	processed_transcript	5	RIKEN cDNA 5830487J09 gene	3.39337	-0.962907	0.412962	-2.22679	0.0259614	0.0734333
ENSMUSG00000022269	March11	protein_coding	15	E3 ubiquitin-protein ligase MARCH11	97.3765	-0.962354	0.164895	-5.82942	5.56199e-09	6.18453e-08
ENSMUSG00000000303	Cdh1	protein_coding	8	cadherin 1	34.1773	-0.961422	0.252318	-3.77657	0.000159004	0.000841884
ENSMUSG00000058607	Rpl31-ps20	processed_pseudogene	19	ribosomal protein L31, pseudogene 20	3.76079	-0.957602	0.412454	-2.26211	0.0236909	0.0680783
ENSMUSG00000027293	Ehd4	protein_coding	2	EH domain-containing protein 4	5525.95	-0.956403	0.0484722	-19.7311	1.16566e-86	1.57731e-84
ENSMUSG00000104737	Gm42937	sense_intronic	3	predicted gene 42937	10.1477	-0.956	0.372659	-2.56351	0.010362	0.0339579
ENSMUSG00000032816	Igdcc4	protein_coding	9	Immunoglobulin superfamily DCC subclass member 4	281.657	-0.955139	0.133804	-7.13174	9.91056e-13	1.66456e-11
ENSMUSG00000028643	Svbp	protein_coding	4	small vasohibin binding protein	878.719	-0.953123	0.0622357	-15.3124	6.31763e-53	4.88496e-51
ENSMUSG00000097317	Gm17281	lincRNA	2	predicted gene, 17281	1.64559	-0.951962	0.37199	-2.27184	0.0230965
ENSMUSG00000034533	Scn10a	protein_coding	9	sodium channel, voltage-gated, type X, alpha	44.9064	-0.951218	0.231811	-4.08225	4.46012e-05	0.000266038
ENSMUSG00000116090	AC123611.1	processed_pseudogene	15		3.94425	-0.950853	0.412357	-2.22844	0.0258514	0.0732086
ENSMUSG00000047067	Dusp28	protein_coding	1	Dual specificity phosphatase 28	174.403	-0.950162	0.140118	-6.77707	1.22634e-11	1.8405e-10
ENSMUSG00000082874	Rpl15-ps1	processed_pseudogene	11	ribosomal protein L15, pseudogene 1	2.46769	-0.9496	0.405536	-2.16165	0.030645	0.084441
ENSMUSG00000022371	Col14a1	protein_coding	15	Collagen alpha-1(XIV) chain	34.9807	-0.949439	0.221153	-4.23109	2.32557e-05	0.000146474
ENSMUSG00000027412	Lpin3	protein_coding	2	Phosphatidate phosphatase LPIN3	1049.68	-0.948866	0.0592349	-16.0174	9.66283e-58	8.02637e-56
ENSMUSG00000097888	Gm26682	lincRNA	18	predicted gene, 26682	4.27892	-0.948715	0.412746	-2.2733	0.0230084	0.0664814
ENSMUSG00000097462	9530026P05Rik	antisense	6	RIKEN cDNA 9530026P05 gene	9.4568	-0.94813	0.401423	-2.29371	0.0218071	0.0636792
ENSMUSG00000067161	Gm5560	processed_pseudogene	5	predicted pseudogene 5560	13.6446	-0.947648	0.334362	-2.78678	0.00532345	0.0191637
ENSMUSG00000041757	Plekha6	protein_coding	1	Pleckstrin homology domain-containing family A member 6	95.3393	-0.942769	0.150175	-6.25126	4.07166e-10	5.25122e-09
ENSMUSG00000030598	Fbxo17	protein_coding	7	F-box only protein 17	307.892	-0.940744	0.0995186	-9.45094	3.35789e-21	1.00253e-19
ENSMUSG00000026365	Cfh	protein_coding	1	Complement factor H	1022.53	-0.940068	0.127525	-7.36805	1.73145e-13	3.14415e-12
ENSMUSG00000088252	Snord13	snoRNA	8	small nucleolar RNA, C/D box 13	13.1677	-0.939826	0.348611	-2.67582	0.00745471	0.0256264
ENSMUSG00000020183	Cpm	protein_coding	10	carboxypeptidase M	29.3497	-0.939431	0.271163	-3.44817	0.000564395	0.00261891
ENSMUSG00000028262	Clca3a2	protein_coding	3	chloride channel accessory 3A2	3.24534	-0.939128	0.412735	-2.15653	0.0310425	0.0853174
ENSMUSG00000000958	Slc7a7	protein_coding	14	Y+L amino acid transporter 1	30.6215	-0.938783	0.245806	-3.78047	0.000156534	0.000830376
ENSMUSG00000052889	Prkcb	protein_coding	7	protein kinase C, beta	5.53232	-0.938186	0.395774	-2.13834	0.0324891	0.0885677
ENSMUSG00000112259	Gm17980	processed_pseudogene	10	predicted gene, 17980	6.30526	-0.937234	0.401887	-2.3542	0.0185627	0.0556882
ENSMUSG00000041378	Cldn5	protein_coding	16	Claudin-5	1.78426	-0.937044	0.367806	-2.65252	0.00798934
ENSMUSG00000023942	Slc29a1	protein_coding	17	solute carrier family 29 (nucleoside transporters), member 1	6486.65	-0.936848	0.049277	-19.0117	1.36338e-80	1.65223e-78
ENSMUSG00000109157	Gm44829	TEC	7	predicted gene 44829	5.85752	-0.93683	0.400645	-2.22786	0.02589	0.073293
ENSMUSG00000081058	Hist2h3c2	protein_coding	3	Histone H3.2	19.2371	-0.934619	0.303496	-3.06507	0.00217618	0.0087669
ENSMUSG00000006638	Abhd1	processed_transcript	5	abhydrolase domain containing 1	241.643	-0.934021	0.108219	-8.62409	6.46042e-18	1.60592e-16
ENSMUSG00000085980	Gm12408	lincRNA	4	predicted gene 12408	6.92886	-0.933793	0.412247	-3.14681	0.0016506	0.00686208
ENSMUSG00000025229	Pitx3	protein_coding	19	Pituitary homeobox 3	107.305	-0.93319	0.1489	-6.24989	4.10754e-10	5.29343e-09
ENSMUSG00000104693	Gm42941	sense_intronic	3	predicted gene 42941	8.76559	-0.930543	0.386114	-2.38046	0.0172909	0.0523594
ENSMUSG00000005667	Mthfd2	protein_coding	6	Bifunctional methylenetetrahydrofolate dehydrogenase/cyclohydrolase, mitochondrial NAD-dependent methylenetetrahydrofolate dehydrogenase Methenyltetrahydrofolate cyclohydrolase	1670.14	-0.929427	0.0781086	-11.9023	1.15197e-32	5.60259e-31
ENSMUSG00000093178	Snord87	snoRNA	1	small nucleolar RNA, C/D box 87	8.32764	-0.928772	0.401048	-2.36207	0.0181732	0.0547153
ENSMUSG00000041372	B4galnt3	protein_coding	6	Beta-1,4-N-acetylgalactosaminyltransferase 3	19.9411	-0.928134	0.32123	-2.90622	0.00365821	0.0138714
ENSMUSG00000039982	Dtx4	protein_coding	19	E3 ubiquitin-protein ligase DTX4	1226.21	-0.926506	0.0659418	-14.0488	7.8322e-45	5.13346e-43
ENSMUSG00000046652	Tas2r143	protein_coding	6	Taste receptor type 2 member 143	1.1458	-0.925491	0.359418	-2.5919	0.00954466
ENSMUSG00000024987	Cyp26a1	protein_coding	19	cytochrome P450 family 26 subfamily A member 1	5.73565	-0.924954	0.4101	-2.31416	0.0206589	0.0609203
ENSMUSG00000040111	Gramd1b	protein_coding	9	Mus musculus GRAM domain containing 1B (Gramd1b), transcript variant 2, mRNA.	94.3883	-0.923233	0.157459	-5.84534	5.0553e-09	5.66619e-08
ENSMUSG00000060961	Slc4a4	protein_coding	5	solute carrier family 4 (anion exchanger), member 4	11.1913	-0.922843	0.358738	-2.57299	0.0100826	0.0331586
ENSMUSG00000041482	Piezo2	protein_coding	18	Piezo-type mechanosensitive ion channel component 2	520.321	-0.922511	0.093851	-9.82715	8.60151e-23	2.84664e-21
ENSMUSG00000006641	Slc5a6	protein_coding	5	Sodium-dependent multivitamin transporter	183.995	-0.922503	0.116261	-7.92524	2.27714e-15	4.82426e-14
ENSMUSG00000031758	Cdyl2	protein_coding	8	Chromodomain Y-like protein 2	19.6826	-0.92143	0.312528	-2.95738	0.0031027	0.0119596
ENSMUSG00000114596	Gm47523	antisense	13	predicted gene, 47523	2.82715	-0.920715	0.401231	-2.44341	0.0145492	0.0453274
ENSMUSG00000094483	Purb	protein_coding	11	purine rich element binding protein B	14205.4	-0.9203	0.0542854	-16.9529	1.83164e-64	1.76627e-62
ENSMUSG00000067001	Serpinb7	protein_coding	1	Serpin B7	10.4428	-0.917659	0.375167	-2.42725	0.0152136	0.0471584
ENSMUSG00000009185	Ccl8	protein_coding	11	C-C motif chemokine 8	15.2356	-0.91761	0.341012	-2.68743	0.00720045	0.0248542
ENSMUSG00000035095	Fam167a	protein_coding	14	Protein FAM167A	219.966	-0.917048	0.140433	-6.53528	6.34903e-11	8.94462e-10
ENSMUSG00000028967	Errfi1	protein_coding	4	Mus musculus ERBB receptor feedback inhibitor 1 (Errfi1), transcript variant 1, mRNA.	3921.74	-0.916712	0.0486088	-18.858	2.52454e-79	2.96219e-77
ENSMUSG00000006435	Neurl1a	protein_coding	19	E3 ubiquitin-protein ligase NEURL1	1695.93	-0.916499	0.0641942	-14.2762	3.08032e-46	2.08406e-44
ENSMUSG00000097378	B230208H11Rik	lincRNA	10	RIKEN cDNA B230208H11 gene	10.2068	-0.9159	0.363822	-2.49135	0.012726	0.0404104
ENSMUSG00000042340	Ctf1	protein_coding	7	Cardiotrophin-1	81.8119	-0.915789	0.170728	-5.34859	8.86432e-08	8.36997e-07
ENSMUSG00000099707	Gm8883	lincRNA	1	predicted gene 8883	12.6033	-0.915297	0.370599	-2.47857	0.0131911	0.0416903
ENSMUSG00000074824	Rslcan18	protein_coding	13	regulator of sex-limitation candidate 18	3.90694	-0.914927	0.412267	-2.12466	0.0336149	0.091001
ENSMUSG00000027556	Car1	protein_coding	3	Carbonic anhydrase 1	2.93739	-0.914112	0.412838	-2.03522	0.0418286	0.108728
ENSMUSG00000036306	Lzts1	protein_coding	8	leucine zipper, putative tumor suppressor 1	424.754	-0.913478	0.0881389	-10.3584	3.83492e-25	1.40188e-23
ENSMUSG00000029307	Dmp1	protein_coding	5	Dentin matrix acidic phosphoprotein 1	124.196	-0.912997	0.156764	-5.80633	6.38575e-09	7.03523e-08
ENSMUSG00000111626	Gm48738	processed_pseudogene	9	predicted gene, 48738	2.1695	-0.910321	0.400739	-2.00585	0.0448719	0.115088
ENSMUSG00000023439	Gnb3	protein_coding	6	guanine nucleotide binding protein (G protein), beta 3	2.22391	-0.909154	0.378973	-2.69818	0.00697191	0.0241748
ENSMUSG00000114724	Gm47751	lincRNA	13	predicted gene, 47751	2.71456	-0.907464	0.398584	-2.84317	0.00446679	0.0164867
ENSMUSG00000114584	Gm47694	TEC	14	predicted gene, 47694	23.6357	-0.907414	0.282512	-3.1866	0.00143958	0.00608431
ENSMUSG00000086596	Susd5	protein_coding	9	sushi domain containing 5	234.283	-0.906986	0.100563	-9.00785	2.10142e-19	5.71469e-18
ENSMUSG00000021388	Aspn	protein_coding	13	Asporin	136.482	-0.905757	0.158424	-5.70901	1.13638e-08	1.21914e-07
ENSMUSG00000055373	Fut9	protein_coding	4	Alpha-(1,3)-fucosyltransferase 9	9.76481	-0.90561	0.374325	-2.35997	0.0182763	0.0549792
ENSMUSG00000113075	Rpl7a-ps1	processed_pseudogene	12	ribosomal protein L7A, pseudogene 1	2.46976	-0.905118	0.409426	-2.06192	0.0392154	0.103247
ENSMUSG00000084899	Gm15344	processed_transcript	10	predicted gene 15344	18.8944	-0.903013	0.297449	-2.99809	0.00271677	0.0106656
ENSMUSG00000058806	Col13a1	protein_coding	10	Collagen alpha-1(XIII) chain	3.46253	-0.902715	0.397809	-2.76759	0.00564716	0.0201347
ENSMUSG00000066975	Cryba4	protein_coding	5	Beta-crystallin A4	9.33443	-0.901955	0.376897	-2.39945	0.0164199	0.050054
ENSMUSG00000029467	Atp2a2	protein_coding	5	Sarcoplasmic/endoplasmic reticulum calcium ATPase 2	8144.13	-0.901821	0.0436086	-20.6797	5.28086e-95	7.98266e-93
ENSMUSG00000027199	Gatm	protein_coding	2	Glycine amidinotransferase, mitochondrial	4013.36	-0.900315	0.0424363	-21.2153	6.89913e-100	1.14614e-97
ENSMUSG00000099719	Gm28802	unprocessed_pseudogene	1	predicted gene 28802	2.36033	-0.899986	0.405854	-2.01281	0.0441347	0.113562
ENSMUSG00000028399	Ptprd	protein_coding	4	protein tyrosine phosphatase, receptor type, D	2038.17	-0.899829	0.0862197	-10.4357	1.70282e-25	6.3072e-24
ENSMUSG00000040605	Bace2	protein_coding	16	beta-site APP-cleaving enzyme 2	78.3359	-0.899755	0.172259	-5.20168	1.97499e-07	1.76832e-06
ENSMUSG00000105272	Gm43071	TEC	3	predicted gene 43071	8.91422	-0.89808	0.360226	-2.41104	0.0159072	0.0488138
ENSMUSG00000020486	Sept4	protein_coding	11	Septin-4	14.1638	-0.898054	0.356208	-2.52221	0.0116619	0.0375359
ENSMUSG00000105461	Gm4742	processed_pseudogene	14	predicted gene 4742	14.794	-0.898031	0.321636	-2.75997	0.00578072	0.0205671
ENSMUSG00000004902	Slc25a18	protein_coding	6	solute carrier family 25 (mitochondrial carrier), member 18	2.69123	-0.896978	0.408126	-2.08695	0.0368931	0.0981963
ENSMUSG00000055523	Gucy2g	protein_coding	19	Guanylate cyclase 2G	4.19512	-0.896331	0.411857	-2.04681	0.0406766	0.106327
ENSMUSG00000031772	Cntnap4	protein_coding	8	Contactin-associated protein-like 4	29.346	-0.895569	0.267377	-3.31949	0.000901813	0.00401927
ENSMUSG00000029788	Cpa5	protein_coding	6	Carboxypeptidase A5	3.21749	-0.895445	0.409981	-2.17625	0.0295365	0.0819839
ENSMUSG00000034685	Fam171a2	protein_coding	11	Protein FAM171A2	1420.61	-0.894673	0.0936989	-9.5486	1.31467e-21	3.99616e-20
ENSMUSG00000065778	Gm22154	snoRNA	4	predicted gene, 22154	31.0613	-0.894631	0.291994	-3.06659	0.00216515	0.00872456
ENSMUSG00000023019	Gpd1	protein_coding	15	glycerol-3-phosphate dehydrogenase 1 (soluble)	29.7251	-0.894627	0.259679	-3.40374	0.000664699	0.0030307
ENSMUSG00000042962	Gm5436	processed_pseudogene	12	predicted pseudogene 5436	26.8679	-0.8945	0.275928	-3.22686	0.00125158	0.0053709
ENSMUSG00000060726	Tmsb15a	protein_coding	X	thymosin beta 15a	3.57945	-0.893871	0.411575	-2.00155	0.0453329	0.116022
ENSMUSG00000034353	Ramp1	protein_coding	1	receptor (calcitonin) activity modifying protein 1	23.4122	-0.89264	0.282901	-3.13713	0.00170612	0.00707014
ENSMUSG00000039474	Wfs1	protein_coding	5	wolframin ER transmembrane glycoprotein	705.116	-0.892312	0.0906253	-9.84534	7.17941e-23	2.38541e-21
ENSMUSG00000021866	Anxa11	protein_coding	14	Annexin A11	473.356	-0.89171	0.0868016	-10.2694	9.68056e-25	3.47816e-23
ENSMUSG00000029161	Cgref1	protein_coding	5	cell growth regulator with EF hand domain protein 1 isoform 2	162.231	-0.891451	0.146448	-6.08402	1.17209e-09	1.42821e-08
ENSMUSG00000104605	Gm42922	TEC	3	predicted gene 42922	4.23242	-0.891278	0.412941	-2.15886	0.0308612	0.0849165
ENSMUSG00000028392	Bspry	protein_coding	4	B box and SPRY domain-containing protein	5.01373	-0.891228	0.405438	-2.10741	0.0350821	0.0942893
ENSMUSG00000022015	Tnfsf11	protein_coding	14	tumor necrosis factor (ligand) superfamily, member 11	5.26896	-0.889878	0.403276	-2.16161	0.0306482	0.084441
ENSMUSG00000005320	Fgfr4	protein_coding	13	fibroblast growth factor receptor 4	548.199	-0.88518	0.0875979	-10.1019	5.41633e-24	1.87383e-22
ENSMUSG00000071343	Gm10327	processed_pseudogene	10	predicted pseudogene 10327	8.35974	-0.885057	0.375795	-2.33041	0.0197846	0.058703
ENSMUSG00000042429	Adora1	protein_coding	1	adenosine A1 receptor	4.22389	-0.884734	0.412478	-2.22478	0.0260962	0.0737647
ENSMUSG00000091577	Gm6211	transcribed_processed_pseudogene	13	predicted gene 6211	2.89383	-0.883502	0.40934	-2.09841	0.0358688	0.0960029
ENSMUSG00000038264	Sema7a	protein_coding	9	Semaphorin-7A	2265.24	-0.882996	0.0551475	-16.0112	1.06683e-57	8.81786e-56
ENSMUSG00000101309	Gm29397	processed_pseudogene	9	predicted gene 29397	6.29579	-0.882438	0.404256	-2.25373	0.0242131	0.0693061
ENSMUSG00000081289	Gm14857	processed_pseudogene	X	predicted gene 14857	6.78039	-0.882261	0.395584	-2.23494	0.0254214	0.0721858
ENSMUSG00000029878	Dbpht2	lincRNA	12		6.84491	-0.882048	0.405826	-2.26111	0.0237524	0.0682202
ENSMUSG00000110303	Gm45328	TEC	7	predicted gene 45328	2.99044	-0.881168	0.413517	-1.90221	0.0571436	0.13985
ENSMUSG00000097274	Gm47512	antisense	10	predicted gene, 47512	4.65006	-0.880855	0.40761	-2.08648	0.0369354	0.0982621
ENSMUSG00000026447	Pik3c2b	protein_coding	1	phosphatidylinositol-4-phosphate 3-kinase catalytic subunit type 2 beta	37.4814	-0.880135	0.249467	-3.50983	0.000448399	0.00212473
ENSMUSG00000002980	Bcam	protein_coding	7	Basal cell adhesion molecule	279.74	-0.879987	0.119228	-7.37722	1.61629e-13	2.93821e-12
ENSMUSG00000043008	Klhl6	protein_coding	16	Kelch-like protein 6	5.78053	-0.87927	0.406135	-2.09625	0.0360601	0.0963929
ENSMUSG00000112145	Gm6218	processed_pseudogene	12	predicted gene 6218	6.57066	-0.878696	0.395309	-2.17337	0.0297528	0.0824887
ENSMUSG00000003153	Slc2a3	protein_coding	6	solute carrier family 2 (facilitated glucose transporter), member 3	15.8664	-0.878673	0.302422	-2.84525	0.00443769	0.0164081
ENSMUSG00000041548	Hspb8	protein_coding	5	Heat shock protein beta-8	2910.61	-0.878541	0.0659758	-13.3158	1.87397e-40	1.11501e-38
ENSMUSG00000032267	Usp28	protein_coding	9	ubiquitin specific peptidase 28	863.367	-0.878453	0.0741756	-11.8406	2.40744e-32	1.15743e-30
ENSMUSG00000106062	Gm43820	TEC	3	predicted gene 43820	6.39243	-0.875998	0.402203	-2.16752	0.0301951	0.0833707
ENSMUSG00000065418	Mir322	miRNA	X	microRNA 322	4.23698	-0.875045	0.413182	-2.06038	0.0393618	0.103535
ENSMUSG00000085762	Lrrc75aos2	antisense	11	leucine rich repeat containing 75A, opposite strand 2	14.5304	-0.874553	0.335255	-2.58591	0.00971226	0.0321297
ENSMUSG00000060180	Myh13	protein_coding	11	myosin heavy chain 13	2.82065	-0.873755	0.403215	-2.31251	0.0207496	0.0611338
ENSMUSG00000050549	Fam241a	protein_coding	3	Uncharacterized protein FAM241A	123.888	-0.873693	0.164859	-5.29814	1.16991e-07	1.08693e-06
ENSMUSG00000038608	Dock10	protein_coding	1	dedicator of cytokinesis 10	24.5936	-0.873421	0.29572	-2.91274	0.00358274	0.0136191
ENSMUSG00000112716	4930471E19Rik	lincRNA	10	RIKEN cDNA 4930471E19 gene	38.1097	-0.873325	0.243722	-3.5577	0.00037411	0.0018104
ENSMUSG00000110841	Gpx4-ps2	transcribed_processed_pseudogene	10	glutathione peroxidase 4, pseudogene 2	26.7773	-0.871689	0.272953	-3.18482	0.00144842	0.0061109
ENSMUSG00000063873	Slc24a3	protein_coding	2	solute carrier family 24 (sodium/potassium/calcium exchanger), member 3	53.409	-0.87166	0.227994	-3.81824	0.000134405	0.000723046
ENSMUSG00000103477	5930409G06Rik	TEC	3	RIKEN cDNA 5930409G06 gene	36.5979	-0.871604	0.219213	-3.93569	8.29563e-05	0.000467245
ENSMUSG00000018995	Nars2	protein_coding	7	Probable asparagine--tRNA ligase, mitochondrial	401.854	-0.870938	0.0898906	-9.6866	3.43776e-22	1.08019e-20
ENSMUSG00000031383	Dusp9	protein_coding	X	dual specificity phosphatase 9	107.618	-0.870075	0.156358	-5.56254	2.6587e-08	2.69712e-07
ENSMUSG00000032033	Barx2	protein_coding	9	Homeobox protein BarH-like 2	6.78088	-0.868043	0.393501	-2.15012	0.0315454	0.0864164
ENSMUSG00000053192	Mllt11	protein_coding	3	myeloid/lymphoid or mixed-lineage leukemia; translocated to, 11	549.011	-0.867063	0.080349	-10.7886	3.89778e-27	1.55346e-25
ENSMUSG00000022788	Fgd4	protein_coding	16	FYVE, RhoGEF and PH domain-containing protein 4	177.582	-0.866712	0.12452	-6.95223	3.59568e-12	5.69706e-11
ENSMUSG00000032946	Rasgrp2	protein_coding	19	RAS, guanyl releasing protein 2	2.90163	-0.865399	0.401881	-2.29873	0.0215203	0.0629406
ENSMUSG00000029304	Spp1	protein_coding	5	secreted phosphoprotein 1	70632.5	-0.865296	0.0445946	-19.4035	7.21457e-84	9.24071e-82
ENSMUSG00000073530	Pappa2	protein_coding	1	pappalysin 2	22.2606	-0.863426	0.358139	-2.42522	0.0152993	0.0473978
ENSMUSG00000090243	Gm16103	processed_pseudogene	1	predicted gene 16103	4.2212	-0.863421	0.412904	-2.13283	0.0329391	0.0895036
ENSMUSG00000025350	Rdh5	protein_coding	10	Mus musculus retinol dehydrogenase 5 (Rdh5), transcript variant 2, mRNA.	162.109	-0.863209	0.138747	-6.21744	5.05345e-10	6.45788e-09
ENSMUSG00000022836	Mylk	protein_coding	16	myosin light chain kinase	127.176	-0.860809	0.161991	-5.30979	1.0975e-07	1.02476e-06
ENSMUSG00000029123	Stk32b	protein_coding	5	Serine/threonine-protein kinase 32B	1.39267	-0.860683	0.358948	-2.48343	0.0130124
ENSMUSG00000025429	Pstpip2	protein_coding	18	Proline-serine-threonine phosphatase-interacting protein 2	303.857	-0.860552	0.108675	-7.91486	2.47536e-15	5.231e-14
ENSMUSG00000106086	Gm43352	antisense	3	predicted gene 43352	6.41549	-0.86001	0.404946	-2.22302	0.0262148	0.0740875
ENSMUSG00000014609	Chrne	protein_coding	11	cholinergic receptor, nicotinic, epsilon polypeptide	1.94987	-0.858421	0.374976	-2.57775	0.00994463	0.032795
ENSMUSG00000068615	Gjd2	protein_coding	2	gap junction protein, delta 2	2.18373	-0.856235	0.397983	-2.26447	0.0235451	0.0677754
ENSMUSG00000048349	Pou4f1	protein_coding	14	POU domain, class 4, transcription factor 1	16.5504	-0.855408	0.330013	-2.57464	0.0100344	0.0330196
ENSMUSG00000018500	Adora2b	protein_coding	11	adenosine A2b receptor	435.566	-0.854807	0.0779443	-10.9592	6.00205e-28	2.44438e-26
ENSMUSG00000044313	Mab21l3	protein_coding	3	Protein mab-21-like 3	20.0682	-0.854729	0.313764	-2.71415	0.00664469	0.0231839
ENSMUSG00000052373	Mpp3	protein_coding	11	membrane palmitoylated protein 3	30.6007	-0.854302	0.26263	-3.2391	0.00119909	0.00516414
ENSMUSG00000116223	AC161165.3	antisense	15		1.97591	-0.853104	0.395551	-2.24574	0.0247209	0.0705669
ENSMUSG00000105954	Gm42793	TEC	5	predicted gene 42793	13.5891	-0.851028	0.32742	-2.49732	0.0125138	0.0398573
ENSMUSG00000028024	Enpep	protein_coding	3	glutamyl aminopeptidase	53.6271	-0.850597	0.190715	-4.42962	9.44013e-06	6.39725e-05
ENSMUSG00000056203	Tas2r135	protein_coding	6	taste receptor, type 2, member 135	1.28866	-0.849905	0.370121	-1.80503	0.07107
ENSMUSG00000050071	Bex1	protein_coding	X	Protein BEX1	3.01651	-0.84979	0.411107	-1.9886	0.0467456	0.118948
ENSMUSG00000053469	Tg	protein_coding	15	Thyroglobulin	187.749	-0.849616	0.149786	-5.67802	1.36259e-08	1.44794e-07
ENSMUSG00000018599	Mief2	protein_coding	11	Mitochondrial dynamics protein MID49	293.948	-0.849508	0.10312	-8.23488	1.79744e-16	4.09772e-15
ENSMUSG00000106874	Gm20186	lincRNA	6	predicted gene, 20186	6.24491	-0.849336	0.391829	-2.09241	0.0364022	0.0970898
ENSMUSG00000051079	Rgs13	protein_coding	1	Regulator of G-protein signaling 13	1.91844	-0.848456	0.400487	-1.85612	0.0634362	0.151565
ENSMUSG00000057726	Serpinb9g	protein_coding	13	serine (or cysteine) peptidase inhibitor, clade B, member 9g	2.51668	-0.848396	0.398126	-2.79744	0.00515099	0.0186389
ENSMUSG00000009471	Myod1	protein_coding	7	Myoblast determination protein 1	1446.09	-0.847795	0.0668366	-12.683	7.34343e-37	4.03985e-35
ENSMUSG00000097876	Gm16892	lincRNA	16	predicted gene, 16892	1.66401	-0.84681	0.384671	-1.89556	0.0580185
ENSMUSG00000074195	Clca4b	protein_coding	3	chloride channel accessory 4B	5.10663	-0.842867	0.406031	-2.00601	0.0448556	0.115064
ENSMUSG00000030403	Vasp	protein_coding	7	vasodilator-stimulated phosphoprotein	3709.05	-0.842231	0.043911	-19.1803	5.41154e-82	6.82709e-80
ENSMUSG00000002104	Rapsn	protein_coding	2	43 kDa receptor-associated protein of the synapse	1967.48	-0.8401	0.0583736	-14.3908	5.91153e-47	4.06514e-45
ENSMUSG00000074221	Zfp568	protein_coding	7	zinc finger protein 568	2783.96	-0.839685	0.0601635	-13.9563	2.87999e-44	1.85147e-42
ENSMUSG00000051497	Kcnj16	protein_coding	11	Inward rectifier potassium channel 16	11.8552	-0.838981	0.336193	-2.40424	0.0162061	0.0495561
ENSMUSG00000086391	1700042O10Rik	antisense	11	RIKEN cDNA 1700042O10 gene	5.85089	-0.838941	0.402677	-2.07577	0.0379152	0.100249
ENSMUSG00000025938	Slco5a1	protein_coding	1	solute carrier organic anion transporter family, member 5A1	24.8551	-0.838455	0.292203	-2.87884	0.00399143	0.0149592
ENSMUSG00000101355	Hist1h3h	protein_coding	13	Histone H3.1	260.749	-0.838361	0.140096	-5.97653	2.27934e-09	2.66516e-08
ENSMUSG00000056359	D830013O20Rik	lincRNA	12		2.42484	-0.838334	0.40805	-1.92935	0.0536878	0.133042
ENSMUSG00000023236	Scg5	protein_coding	2	secretogranin V	8.74833	-0.838077	0.373924	-2.17239	0.029826	0.082637
ENSMUSG00000103767	Gm37858	TEC	1	predicted gene, 37858	3.24906	-0.837487	0.408955	-2.00563	0.0448957	0.115131
ENSMUSG00000051243	Islr2	protein_coding	9	Immunoglobulin superfamily containing leucine-rich repeat protein 2	18.5567	-0.837016	0.319672	-2.62245	0.00873012	0.0293611
ENSMUSG00000084013	Gm14270	processed_pseudogene	2	predicted gene 14270	19.24	-0.836849	0.308015	-2.71458	0.00663592	0.0231629
ENSMUSG00000022790	Igsf11	protein_coding	16	Immunoglobulin superfamily member 11	179.366	-0.836705	0.124476	-6.7128	1.90923e-11	2.81256e-10
ENSMUSG00000100410	2310020H05Rik	lincRNA	13	RIKEN cDNA 2310020H05 gene	5.95202	-0.836605	0.402522	-1.96717	0.0491641	0.123767
ENSMUSG00000056612	Ppp1r14b	protein_coding	19	Protein phosphatase 1 regulatory subunit 14B	2106.68	-0.836153	0.0442177	-18.9091	9.59509e-80	1.14182e-77
ENSMUSG00000041329	Atp1b2	protein_coding	11	Sodium/potassium-transporting ATPase subunit beta-2	2.1879	-0.833934	0.407404	-1.7985	0.072098	0.167525
ENSMUSG00000084939	Gm830	processed_transcript	4	predicted gene 830	3.18197	-0.833766	0.408044	-2.33264	0.0196672	0.0584166
ENSMUSG00000084333	Gm11599	processed_pseudogene	1	predicted gene 11599	3.67921	-0.833393	0.41272	-1.92246	0.0545477	0.134854
ENSMUSG00000083689	Gm14094	processed_pseudogene	2	predicted gene 14094	63.9854	-0.833111	0.209727	-3.96617	7.30353e-05	0.000416965
ENSMUSG00000047787	Flrt1	protein_coding	19	Leucine-rich repeat transmembrane protein FLRT1	7.84918	-0.831666	0.410252	-2.22287	0.0262246	0.074103
ENSMUSG00000082108	Gm13777	processed_pseudogene	2	predicted gene 13777	3.01928	-0.831657	0.41234	-1.94485	0.0517927	0.129032
ENSMUSG00000033065	Pfkm	protein_coding	15	Mus musculus phosphofructokinase, muscle (Pfkm), transcript variant 4, mRNA.	2900.22	-0.8298	0.0715541	-11.5963	4.30158e-31	1.96665e-29
ENSMUSG00000094655	Gm25360	snRNA	1	predicted gene, 25360	8.62879	-0.829456	0.368673	-2.18549	0.028853	0.0803794
ENSMUSG00000087813	Gm22490	snoRNA	5	predicted gene, 22490	1.83843	-0.829203	0.396791	-1.64607	0.0997502
ENSMUSG00000025790	Slco3a1	protein_coding	7	Solute carrier organic anion transporter family member 3A1	854.244	-0.828719	0.0611893	-13.5415	8.90105e-42	5.41126e-40
ENSMUSG00000024236	Svil	protein_coding	18	supervillin	2388.42	-0.828112	0.0787011	-10.5221	6.83391e-26	2.61795e-24
ENSMUSG00000022296	Baalc	protein_coding	15	Brain and acute leukemia cytoplasmic protein	161.314	-0.828039	0.127384	-6.49327	8.39908e-11	1.1647e-09
ENSMUSG00000113409	Gm8288	processed_pseudogene	13	predicted gene 8288	2.04151	-0.827555	0.394944	-2.22661	0.0259736	0.0734555
ENSMUSG00000062184	Hs6st2	protein_coding	X	Heparan-sulfate 6-O-sulfotransferase 2	28.9194	-0.827548	0.281099	-2.93751	0.00330862	0.0126776
ENSMUSG00000105962	Gm42432	TEC	9	predicted gene 42432	8.85419	-0.827546	0.37451	-2.18139	0.0291548	0.0810993
ENSMUSG00000032068	Plet1	protein_coding	9	Placenta-expressed transcript 1 protein	32.3125	-0.82638	0.300029	-2.81973	0.00480642	0.0175663
ENSMUSG00000096968	Gm26620	protein_coding	1		3.13059	-0.826264	0.41164	-1.98572	0.0470647	0.119597
ENSMUSG00000040010	Slc7a5	protein_coding	8	solute carrier family 7 (cationic amino acid transporter, y+ system), member 5	2194.2	-0.826043	0.0747668	-11.0502	2.18672e-28	9.08192e-27
ENSMUSG00000102374	Gm38387	TEC	1	predicted gene, 38387	8.76098	-0.825548	0.373984	-2.18494	0.0288931	0.0804775
ENSMUSG00000026117	Zap70	protein_coding	1	zeta-chain (TCR) associated protein kinase	3.99589	-0.824445	0.408626	-2.26213	0.0236897	0.0680783
ENSMUSG00000074217	2210011C24Rik	protein_coding	8	RIKEN cDNA 2210011C24 gene	23.8298	-0.823617	0.327524	-2.50555	0.0122262	0.0390599
ENSMUSG00000091184	Gm17059	antisense	10	predicted gene 17059	3.64852	-0.823524	0.40753	-2.79331	0.00521713	0.0188373
ENSMUSG00000016179	Camk1g	protein_coding	1	Calcium/calmodulin-dependent protein kinase type 1G	36.3293	-0.822706	0.264901	-3.10134	0.0019265	0.00786682
ENSMUSG00000115817	AC134577.3	lincRNA	14		22.6907	-0.822407	0.290829	-2.79575	0.00517797	0.0187264
ENSMUSG00000103507	Gm38375	TEC	9	predicted gene, 38375	11.6699	-0.82237	0.341688	-2.36124	0.0182139	0.054828
ENSMUSG00000024731	Ms4a10	protein_coding	19	Membrane-spanning 4-domains subfamily A member 10	3.33377	-0.822294	0.411778	-2.03951	0.0413993	0.107813
ENSMUSG00000037254	Itih2	protein_coding	2	inter-alpha trypsin inhibitor, heavy chain 2	4.41567	-0.821949	0.409022	-1.87019	0.0614569	0.14813
ENSMUSG00000027257	Pacsin3	protein_coding	2	Protein kinase C and casein kinase II substrate protein 3	2014.14	-0.821073	0.0661979	-12.4031	2.51492e-35	1.33538e-33
ENSMUSG00000055435	Maf	protein_coding	8	Transcription factor Maf	412.484	-0.819151	0.091899	-8.9063	5.27644e-19	1.40306e-17
ENSMUSG00000071192	Wfikkn1	protein_coding	17	WAP, FS, Ig, KU, and NTR-containing protein 1	3.25427	-0.818734	0.412905	-1.95893	0.0501205	0.125781
ENSMUSG00000002688	Prkd1	protein_coding	12	protein kinase D1	8.73247	-0.818559	0.393004	-2.08725	0.0368658	0.0981391
ENSMUSG00000029275	Gfi1	protein_coding	5	growth factor independent 1 transcriptional repressor	3.92244	-0.818537	0.413491	-1.97219	0.0485879	0.122695
ENSMUSG00000020633	Dcdc2c	protein_coding	12	Doublecortin domain-containing protein 2C	2.40841	-0.818255	0.396953	-2.16728	0.0302139	0.0834088
ENSMUSG00000028649	Macf1	protein_coding	4	microtubule-actin crosslinking factor 1	34315.9	-0.818033	0.144877	-5.64637	1.6387e-08	1.71848e-07
ENSMUSG00000033249	Hsf4	protein_coding	8	Heat shock factor protein 4	63.0674	-0.817708	0.185405	-4.40089	1.07807e-05	7.22402e-05
ENSMUSG00000043230	Fam124b	protein_coding	1	Protein FAM124B	1.53153	-0.81654	0.375485	-2.04981	0.0403832
ENSMUSG00000064325	Hhip	protein_coding	8	Hedgehog-interacting protein	359.053	-0.816177	0.100184	-8.13745	4.03692e-16	8.88916e-15
ENSMUSG00000031595	Pdgfrl	protein_coding	8	platelet derived growth factor receptor like	365.04	-0.816165	0.0920223	-8.8641	7.71279e-19	2.0348e-17
ENSMUSG00000043155	Hpdl	protein_coding	4	4-hydroxyphenylpyruvate dioxygenase-like protein	13.5656	-0.815983	0.349565	-2.34448	0.0190534	0.0568856
ENSMUSG00000031465	Angpt2	protein_coding	8	Angiopoietin-2	38.5471	-0.815823	0.22729	-3.56049	0.000370159	0.00179506
ENSMUSG00000068735	Trp53i11	protein_coding	2	transformation related protein 53 inducible protein 11	65.4582	-0.815573	0.190363	-4.28215	1.85098e-05	0.000118858
ENSMUSG00000030319	Cand2	protein_coding	6	Cullin-associated NEDD8-dissociated protein 2	429.063	-0.814506	0.0978971	-8.31737	8.99332e-17	2.09582e-15
ENSMUSG00000094392	Gm3788	processed_pseudogene	3	predicted gene 3788	17.6905	-0.812887	0.312522	-2.60229	0.00926025	0.0308473
ENSMUSG00000034009	Rxfp1	protein_coding	3	Relaxin receptor 1	2.36981	-0.811291	0.406544	-1.83323	0.0667683	0.157545
ENSMUSG00000097495	Gm26651	lincRNA	13	predicted gene, 26651	14.4738	-0.809948	0.346277	-2.37262	0.0176626	0.0533792
ENSMUSG00000092130	D030025P21Rik	antisense	12	RIKEN cDNA D030025P21 gene	11.9533	-0.809578	0.351538	-2.28207	0.0224853	0.0652623
ENSMUSG00000000318	Clec10a	protein_coding	11	C-type lectin domain family 10 member A	3.219	-0.808087	0.413125	-1.79275	0.0730123	0.169139
ENSMUSG00000046318	Ccbe1	protein_coding	18	Collagen and calcium-binding EGF domain-containing protein 1	72.4446	-0.807922	0.198248	-4.08292	4.44724e-05	0.000265458
ENSMUSG00000024732	Ccdc86	protein_coding	19	Coiled-coil domain-containing protein 86	436.891	-0.80783	0.0827157	-9.76497	1.59153e-22	5.17525e-21
ENSMUSG00000097587	4930578M01Rik	lincRNA	15	RIKEN cDNA 4930578M01 gene	13.5756	-0.806838	0.347545	-2.32102	0.0202855	0.0599879
ENSMUSG00000027602	Map1lc3a	protein_coding	2	Microtubule-associated proteins 1A/1B light chain 3A	1933.96	-0.805643	0.0645299	-12.4851	9.00802e-36	4.84441e-34
ENSMUSG00000024381	Bin1	protein_coding	18	Myc box-dependent-interacting protein 1	14706.4	-0.805628	0.0340639	-23.6505	1.16635e-123	2.79573e-121
ENSMUSG00000027868	Tbx15	protein_coding	3	T-box transcription factor TBX15	1550.16	-0.804572	0.0738395	-10.8961	1.20327e-27	4.85328e-26
ENSMUSG00000024937	Ehbp1l1	protein_coding	19	EH domain-binding protein 1-like protein 1 isoform C	4588.7	-0.804262	0.0512007	-15.7079	1.33529e-55	1.06184e-53
ENSMUSG00000024892	Pcx	protein_coding	19	pyruvate carboxylase	601.322	-0.803333	0.0845937	-9.49407	2.22176e-21	6.69281e-20
ENSMUSG00000033161	Atp1a1	protein_coding	3	Sodium/potassium-transporting ATPase subunit alpha-1	8601.63	-0.803065	0.0389402	-20.623	1.70666e-94	2.55679e-92
ENSMUSG00000064602	Snora41	snoRNA	1	small nucleolar RNA, H/ACA box 41	12.7253	-0.802433	0.355118	-2.2797	0.0226255	0.0655897
ENSMUSG00000027562	Car2	protein_coding	3	Mus musculus carbonic anhydrase 2 (Car2), transcript variant 2, mRNA.	185.736	-0.801143	0.108884	-7.34266	2.09393e-13	3.74164e-12
ENSMUSG00000044770	Scml4	protein_coding	10	Scm polycomb group protein like 4	113.417	-0.80104	0.159991	-4.99944	5.74972e-07	4.7736e-06
ENSMUSG00000108599	Gm10616	TEC	7		7.79125	-0.800751	0.385896	-2.0554	0.03984	0.104531
ENSMUSG00000085156	Snhg15	processed_transcript	11	small nucleolar RNA host gene 15	239.599	-0.800691	0.118864	-6.73995	1.58445e-11	2.35269e-10
ENSMUSG00000031278	Acsl4	protein_coding	X	Long-chain-fatty-acid--CoA ligase 4	5090.15	-0.800177	0.0485059	-16.4962	3.9096e-61	3.50797e-59
ENSMUSG00000116355	AC144732.1	processed_pseudogene	15		4.18732	-0.800009	0.412107	-1.8928	0.0583838	0.142366
ENSMUSG00000090053	Palm2	protein_coding	4	Paralemmin-2	29.3223	-0.799904	0.264233	-3.00656	0.00264218	0.0104166
ENSMUSG00000040528	Milr1	protein_coding	11	Allergin-1	125.699	-0.799728	0.14633	-5.46079	4.7402e-08	4.67858e-07
[truncated: 16,127 more rows]

## Sheet: P_vs_C_day_1
id	gene_name	biotype	chromosome	description	baseMean	log2FoldChange	lfcSE	stat	pvalue	padj
[truncated: 17,112 more rows]

[truncated: 5 more sheets: raw_counts, rlog, normalized (2), samples, ensembl]
