# Supplementary material for: PASK links cellular energy metabolism with a mitotic self-renewal network to establish differentiation competence
Source: eLife journal article supplement (doi:10.7554/elife.81717), 2023-04-13

**Figure 4G**

*Steady-state levels of ac-and total – PASK. Not included in the final figure but is a useful control for ratio of ac/total PASK between lanes 1 and 4-5.*

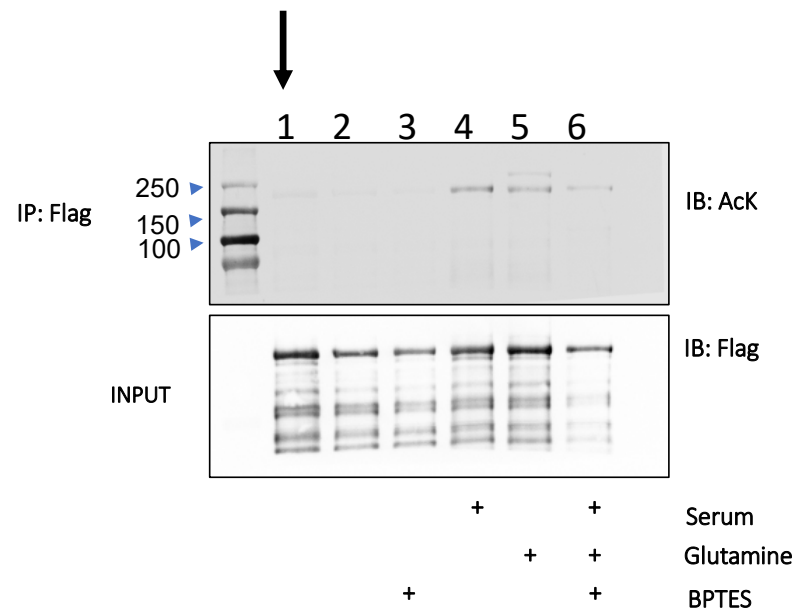

Supplement: supp [file elife-81717-supp-v1.zip]
