# Supplementary material for: PASK links cellular energy metabolism with a mitotic self-renewal network to establish differentiation competence
Source: eLife journal article supplement (doi:10.7554/elife.81717), 2023-04-13
Supplement: supp [file Figure 3 - Figure supplement 3.docx]

**Figure 3 – Source Data Table 3**
