# Supplementary material for: PASK links cellular energy metabolism with a mitotic self-renewal network to establish differentiation competence
Source: eLife journal article supplement (doi:10.7554/elife.81717), 2023-04-13
Supplement: supp [file Source Data - Figure 1A.xlsx]

## Sheet: Sheet2
Average	WT S/L	WT 2i	WT PASKi
OCT3/4	0.893464	0.891286	1.3149
Sox2	0.884928	1.02887	1.12126
Rex1	0.72647	1.10223	1.44783
SD
OCT3/4	0.0683903	0.0341368	0
Sox2	0.00897992	0.0208818	0.022757
Rex1	0.00355629	0	0.021263
