# Supplementary material for: PASK links cellular energy metabolism with a mitotic self-renewal network to establish differentiation competence
Source: eLife journal article supplement (doi:10.7554/elife.81717), 2023-04-13
Supplement: supp [file Source Data - Figure 5 - Figure Supplement 1A.xlsx]

## Sheet: Sheet1
	Pax7			CD34			Myf5			MyoD			MyoG			MHC			Ki67			Foxo3
Sample	Quantity	Average	SD	Quantity	Average	SD	Quantity	Average	SD	Quantity	Average	SD	Quantity	Average	SD	Quantity	Average	SD	Quantity	Average	SD	Quantity	Average	SD
Stem cells, control 1	0.402287	0.510973	0.248405	0.0179177	0.0250562	0.0130806	0.080851	0.158928	0.0963503	0.566425	0.719471	0.232513	3.24482	5.42915	2.41711	11.4111	9.02399	2.83172	0.899438	1.25823	0.325119	0.358737	0.686402	0.465359
Stem cells, control 2	0.795197			0.0170979			0.129327			0.604957			5.01667			5.89525			1.34196			1.21906
Stem cells, Control 3	0.335435			0.040153			0.266606			0.987031			8.02596			9.76562			1.5333			0.481406
Stem cells, Gln- 1	6.67471	6.79418	2.28122	7.83638	17.8474	10.6257	7.7459	12.7353	4.32647	3.29471	5.3039	1.87771	0.273664	0.311385	0.0773529	0.744112	0.745286	0.0893589	0.000432769	0.00211013	0.00164996	0.951575	5.53625	5.03829
Stem cells, Gln- 2	4.57504			28.9962			15.4494			7.0143			0.400362			0.835226			0.00373124			10.9302
Stem cells, Gln- 3	9.1328			16.7096			15.0105			5.60271			0.260129			0.656519			0.00216637			4.72697
ttest			0.00902005			0.0438911			0.00731529			0.0137317			0.0214777			0.0071743			0.00259378			0.172212
