# Supplementary material for: PASK links cellular energy metabolism with a mitotic self-renewal network to establish differentiation competence
Source: eLife journal article supplement (doi:10.7554/elife.81717), 2023-04-13
Supplement: supp [file Source Data - Figure 5 - Figure Supplement 1B.xlsx]

## Sheet: -GBPTESUK
		Pax7		Myog		Acta1		Mylff
		Average	SD	Average	SD	Average	SD	Average	SD
	Control	0.597711	0.196832	110.507	42.237	214.512	16.3714	992.201	518.703
	Gln-	12.6392	7.65573	37.2052	10.229	100.151	57.0668	51.7581	25.2715
	BPTES	3.20625	1.69027	4.70687	4.95345	29.0792	20.1482	12.5496	11.3739
	UK5099	1.06002	0.312431	200.78	26.1786	2086.21	851.725	2999.23	1518.11
