# Supplementary material for: PASK links cellular energy metabolism with a mitotic self-renewal network to establish differentiation competence
Source: eLife journal article supplement (doi:10.7554/elife.81717), 2023-04-13
Supplement: supp [file Source Data - qPCR - Figure Supplement 6E.xlsx]

## Sheet: Sheet1
Pax7
Control	1.21037	1.18101	0.292637
Control	1.45786
Control	0.874804
siPASK	2.92304	3.58458	1.1323	0.023592	ttest
siPASK	2.93869
siPASK	4.89202
Pask
Control	2.65741	4.13331	1.97031
Control	3.37178
Control	6.37073
siPASK	0.454696	0.464719	0.137617	0.0323689	ttest
siPASK	0.332388
siPASK	0.607074
