# Supplementary figures and images for: PASK links cellular energy metabolism with a mitotic self-renewal network to establish differentiation competence
Source: eLife journal article supplement (doi:10.7554/elife.81717), 2023-04-13

**Figure 7B**

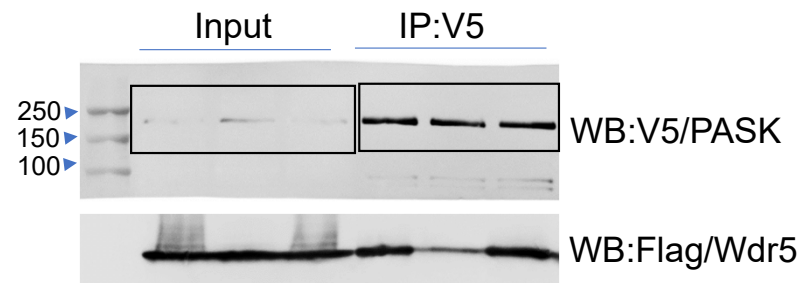

Supplement: supp [file elife-81717-supp-v1.zip]

**Figure 4B**

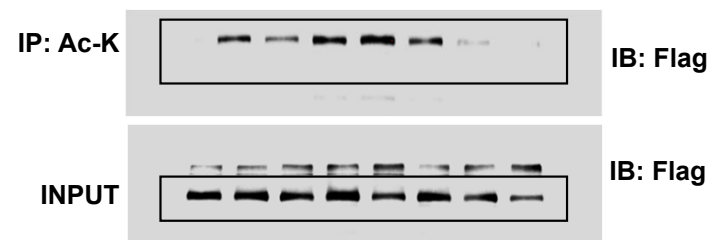

Supplement: supp [file elife-81717-supp-v1.zip]

[A]

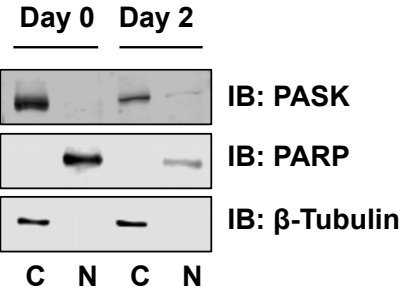

[B]

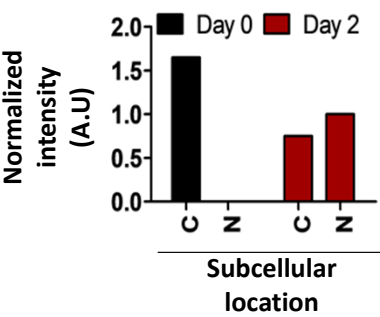

Figure 2- figure Supplement 1

Supplement: supp [file elife-81717-supp-v1.zip]

**Figure 4 – figure supplement 1C**

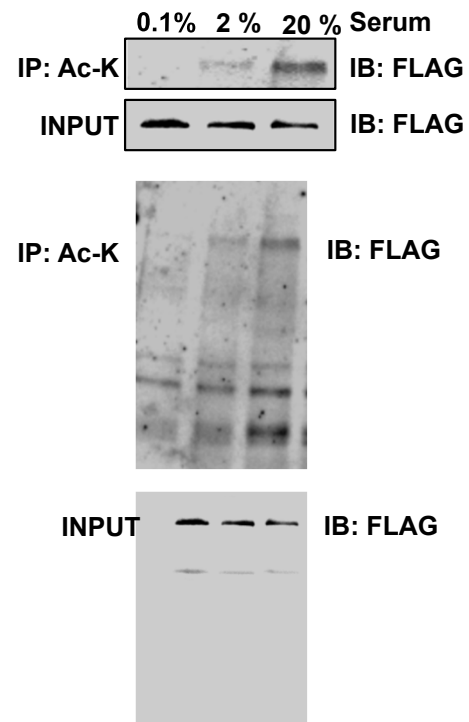

Supplement: supp [file elife-81717-supp-v1.zip]

**Figure 4 – figure supplement 1G**

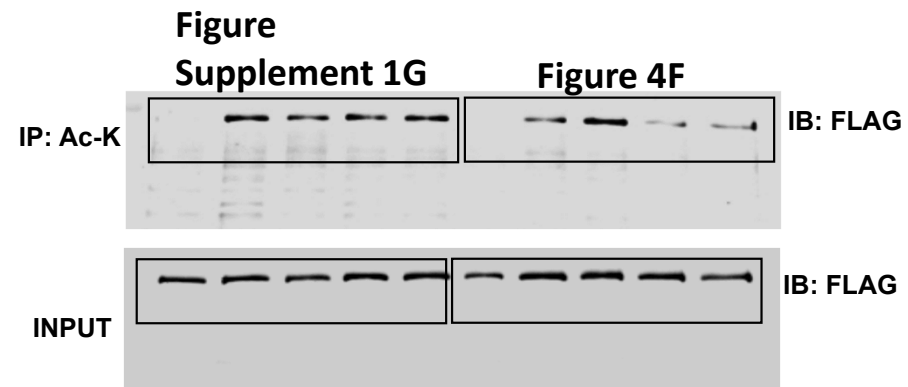

Supplement: supp [file elife-81717-supp-v1.zip]

**Figure 4H**

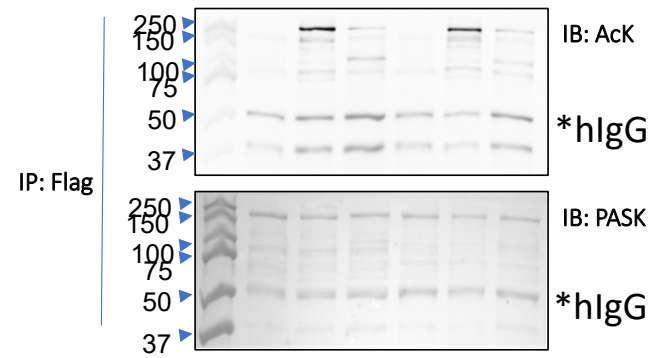

Supplement: supp [file elife-81717-supp-v1.zip]

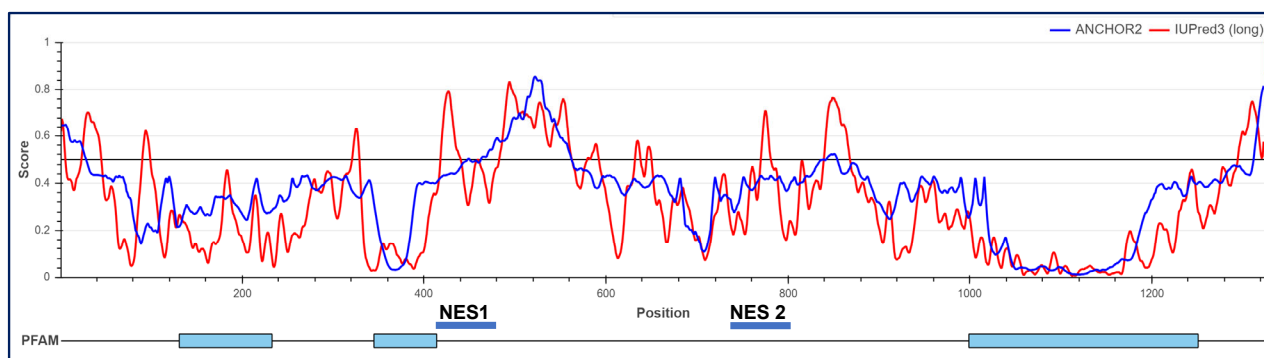

Figure 3- figure Supplement 1

Supplement: supp [file elife-81717-supp-v1.zip]

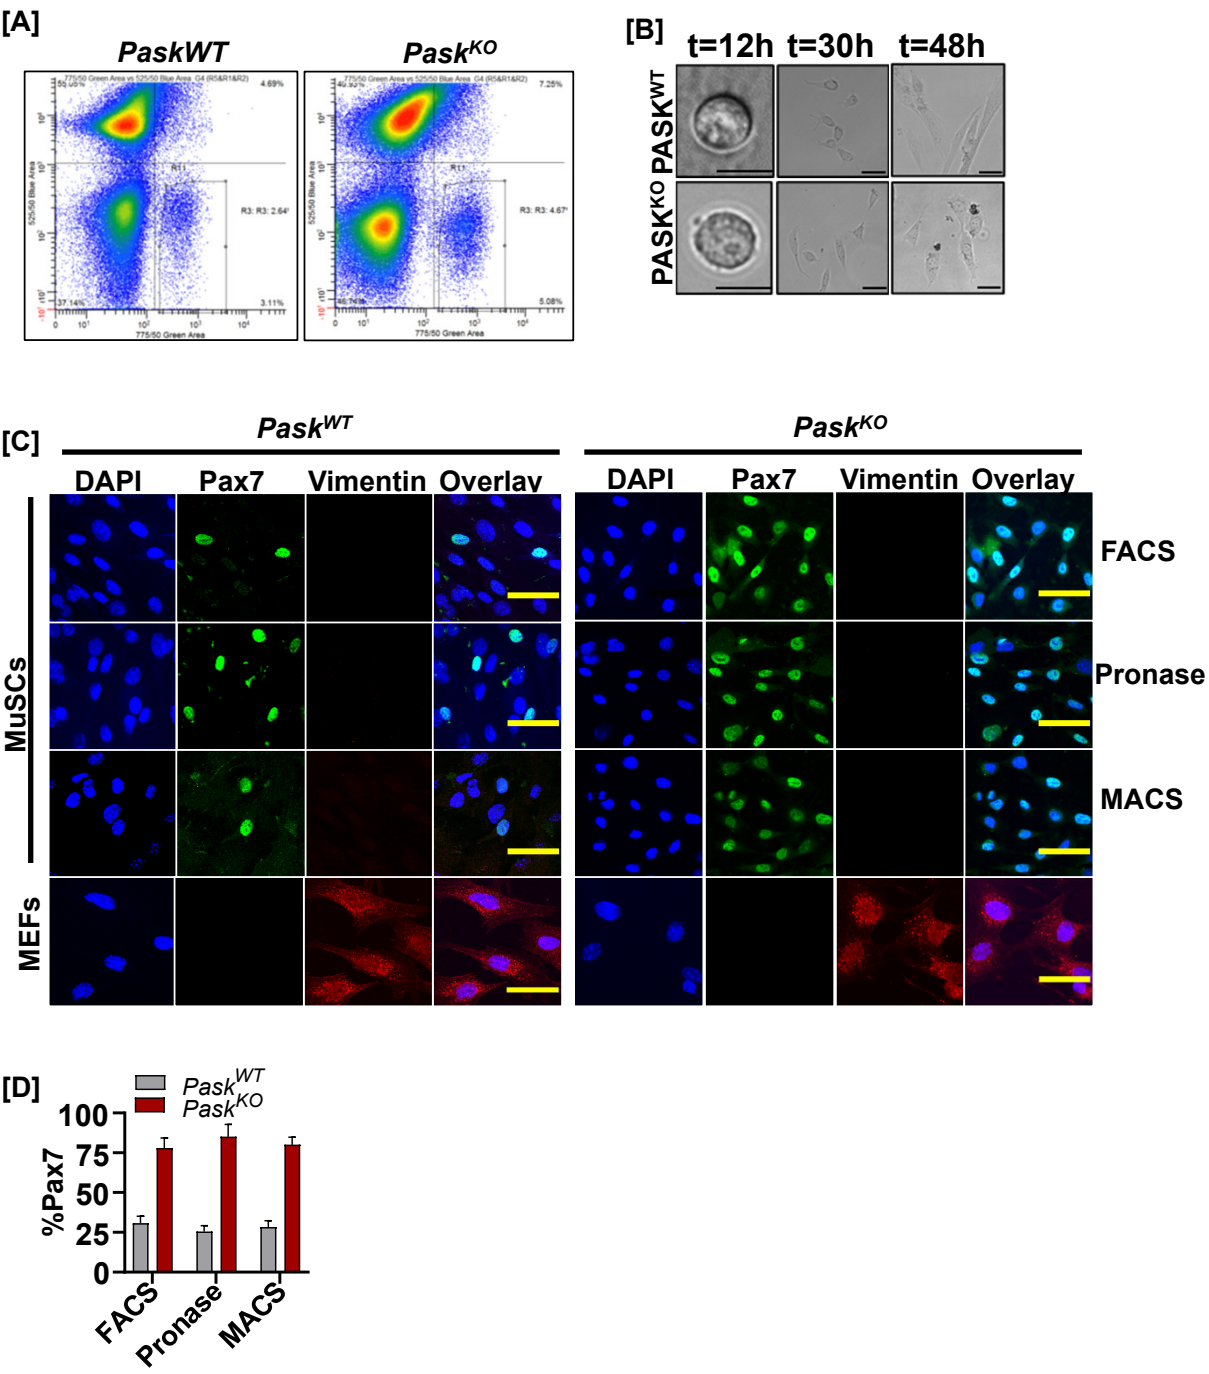

Figure 1- figure Supplement 3

Supplement: supp [file elife-81717-supp-v1.zip]

**Figure 7C**

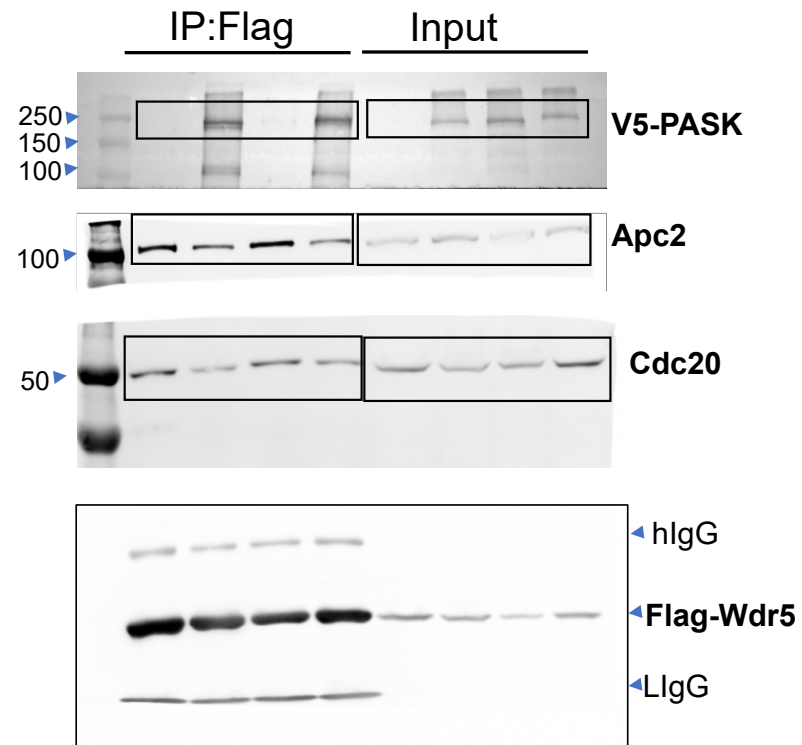

Supplement: supp [file elife-81717-supp-v1.zip]

[A]

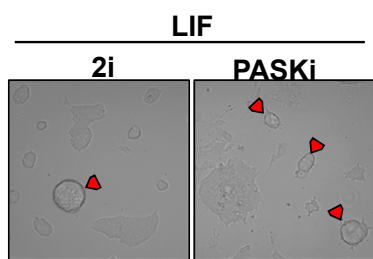

[B]

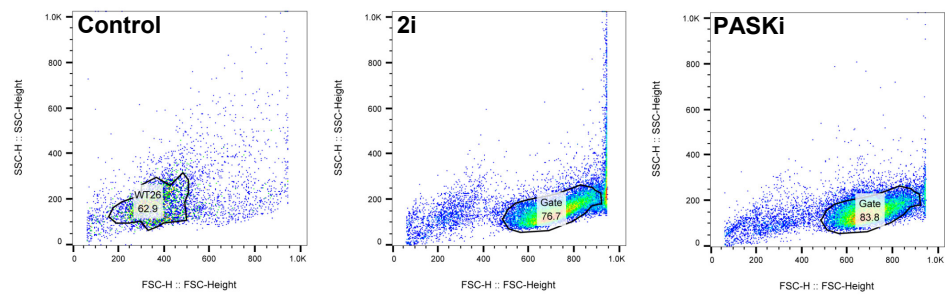

[C]

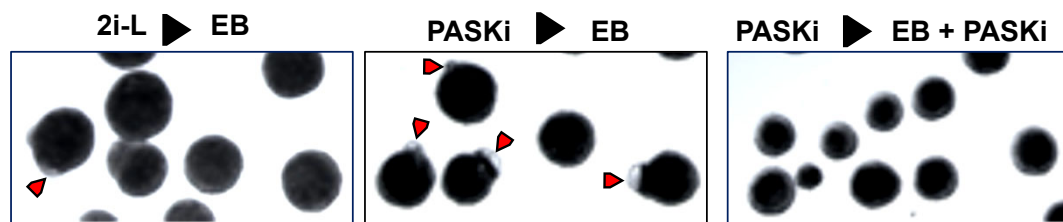

Figure 1- figure Supplement 1

Supplement: supp [file elife-81717-supp-v1.zip]

Figure 4 – figure supplement 1F

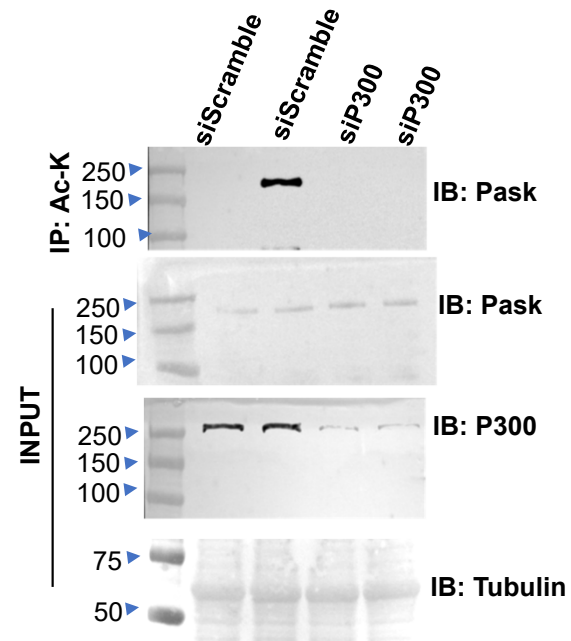

Supplement: supp [file elife-81717-supp-v1.zip]

Proliferative myoblasts

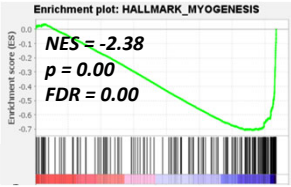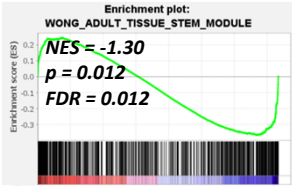

Onset of differentiation

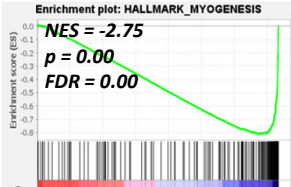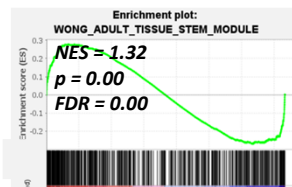

Figure 1- figure Supplement 4

Supplement: supp [file elife-81717-supp-v1.zip]

**Figure 3 – Source Data Table 1**


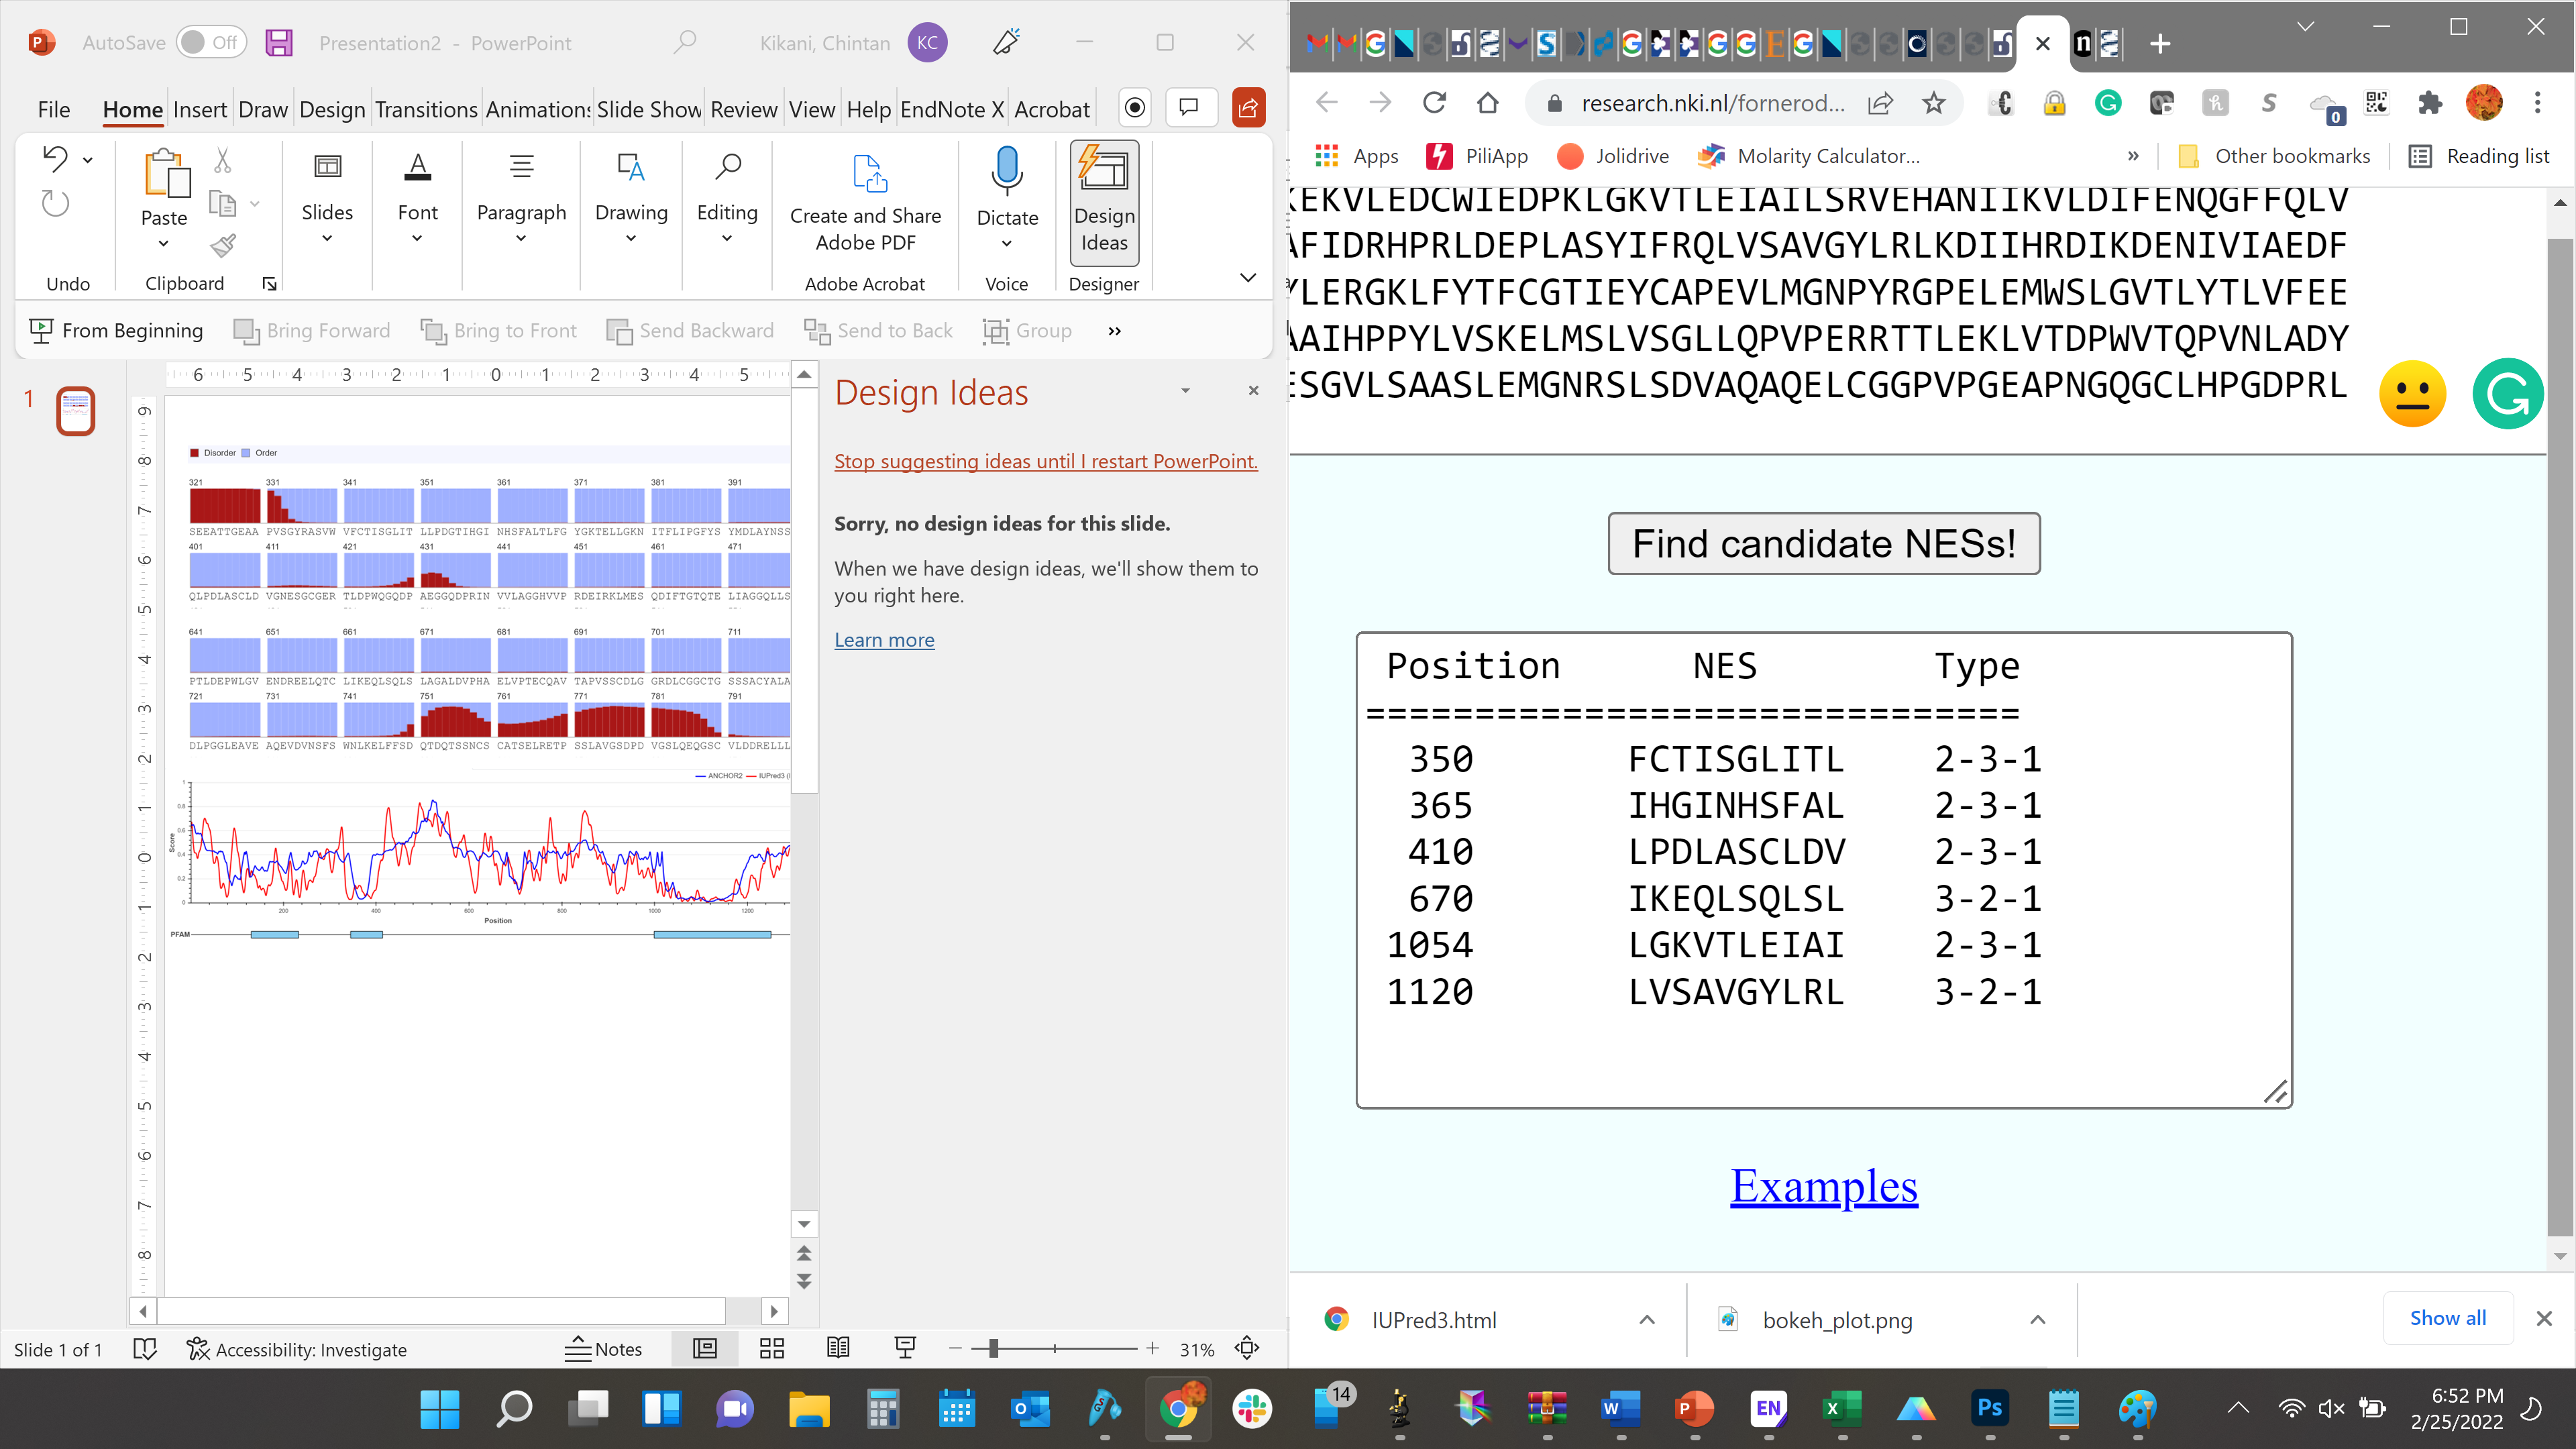

Supplement: supp [file elife-81717-supp-v1.zip]

[A]

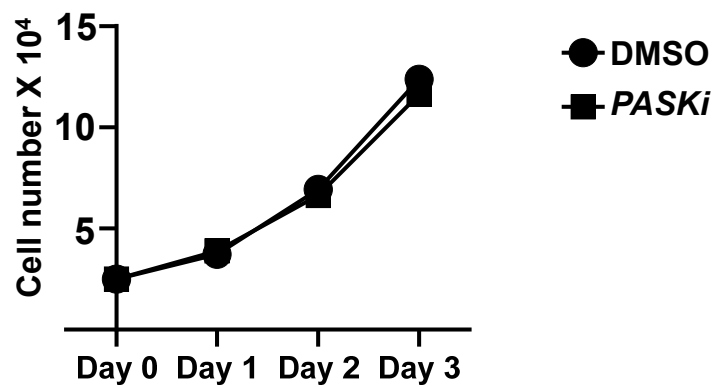

[B]

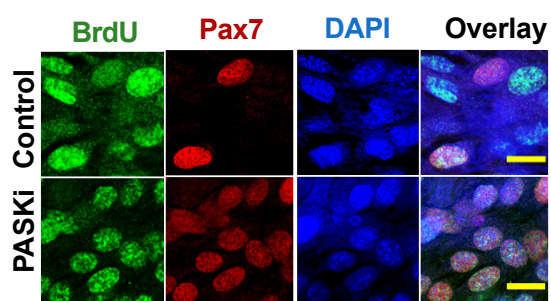

[C]

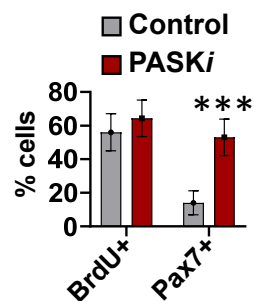

[D]

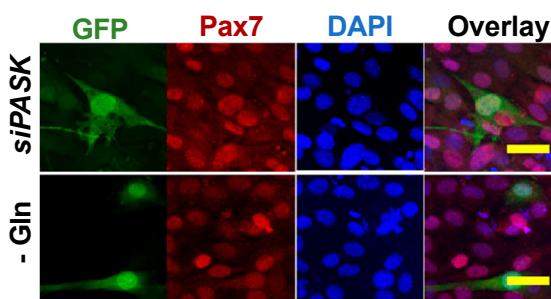

[E]

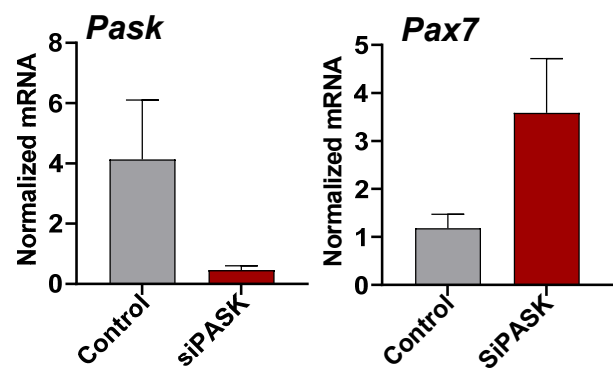

Figure 6- figure supplement 1

Supplement: supp [file elife-81717-supp-v1.zip]

Figure 7 – figure supplement 1C

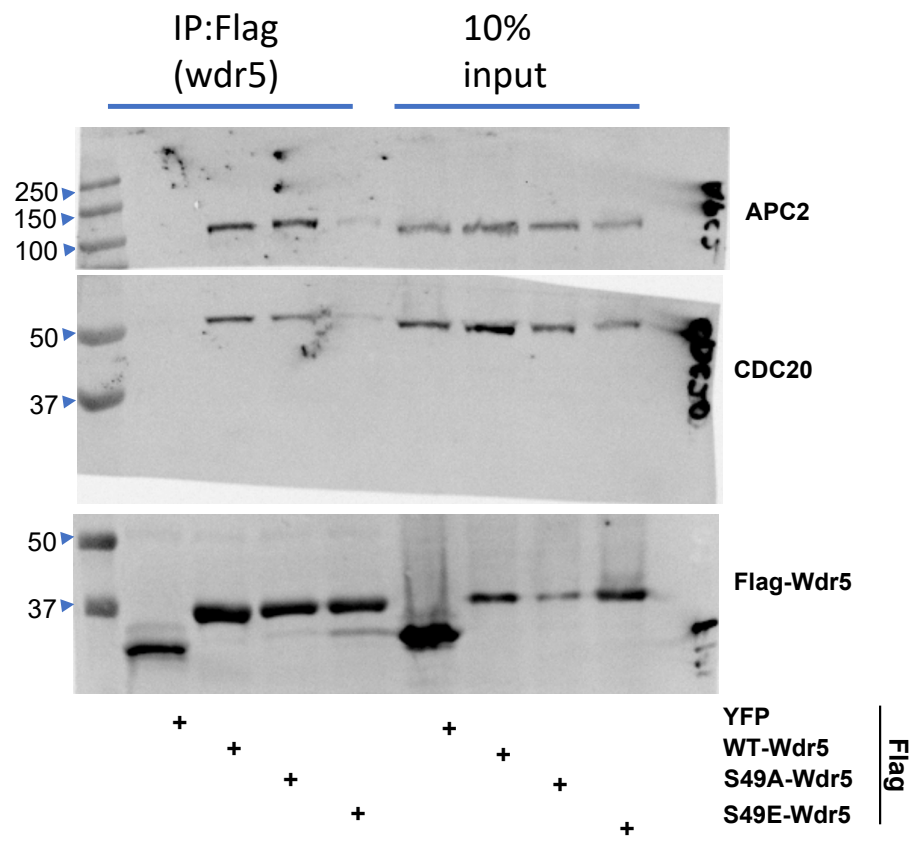

Supplement: supp [file elife-81717-supp-v1.zip]

**Figure 2 – figure supplement 1**

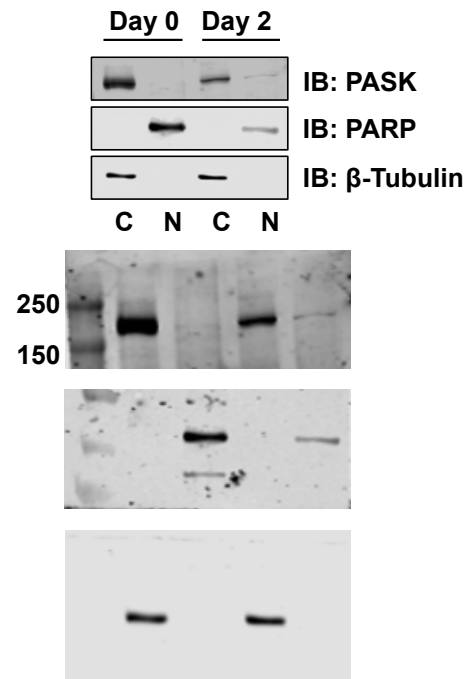

Supplement: supp [file elife-81717-supp-v1.zip]

[A]

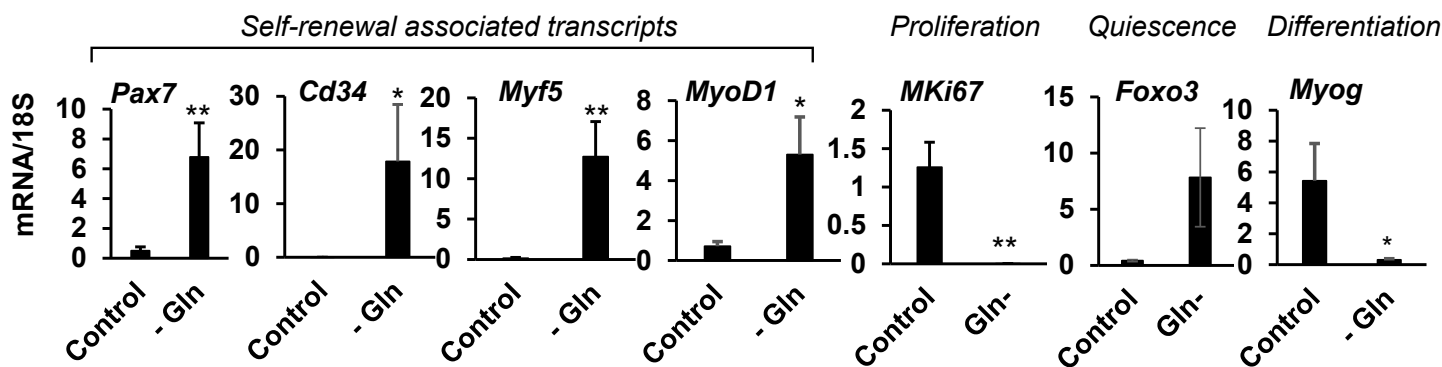

[B]

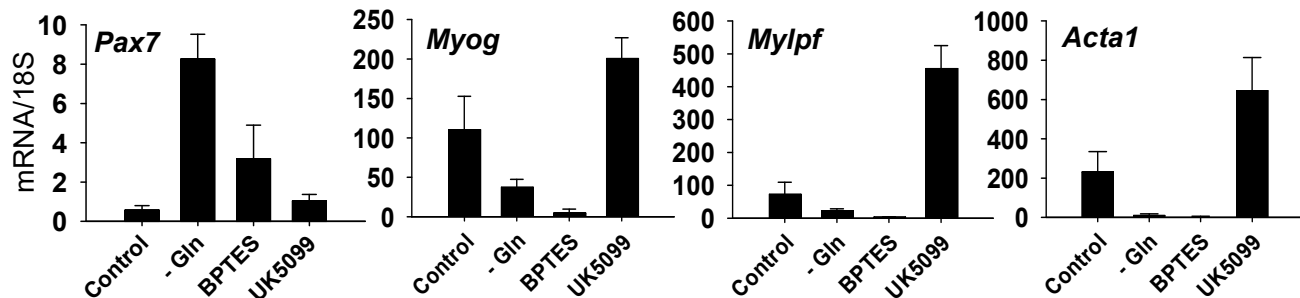

[C]

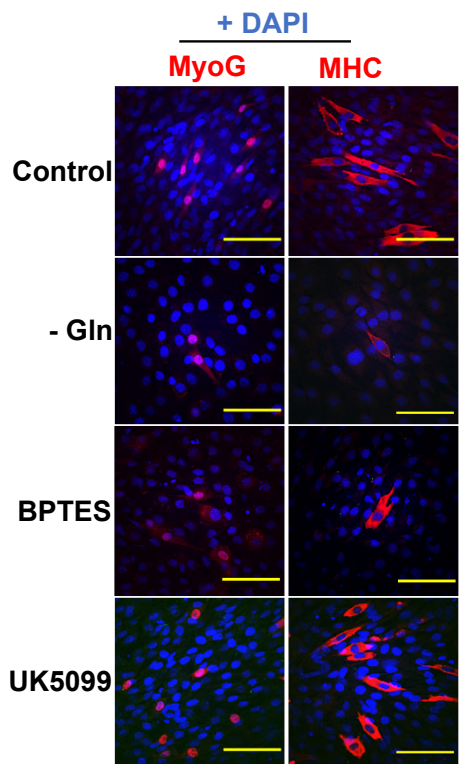

[D]

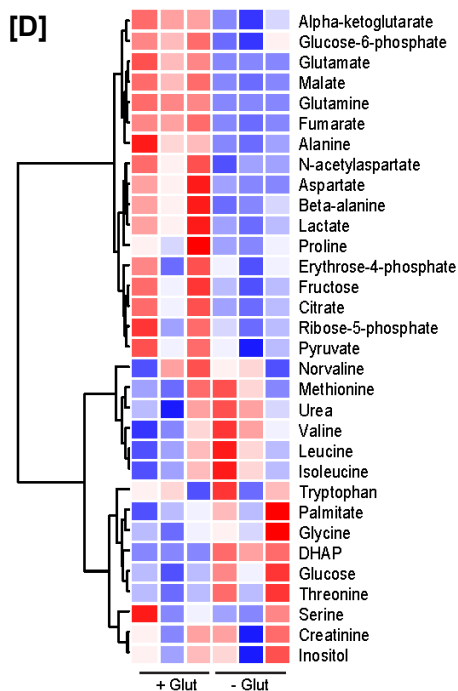

[E]

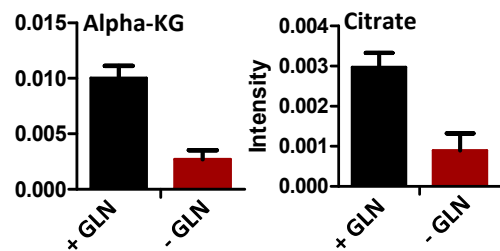

F

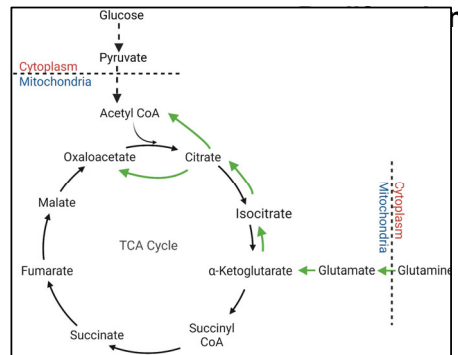

Figure 5- figure supplement 1

Supplement: supp [file elife-81717-supp-v1.zip]

**Figure 4 – figure supplement 1D**

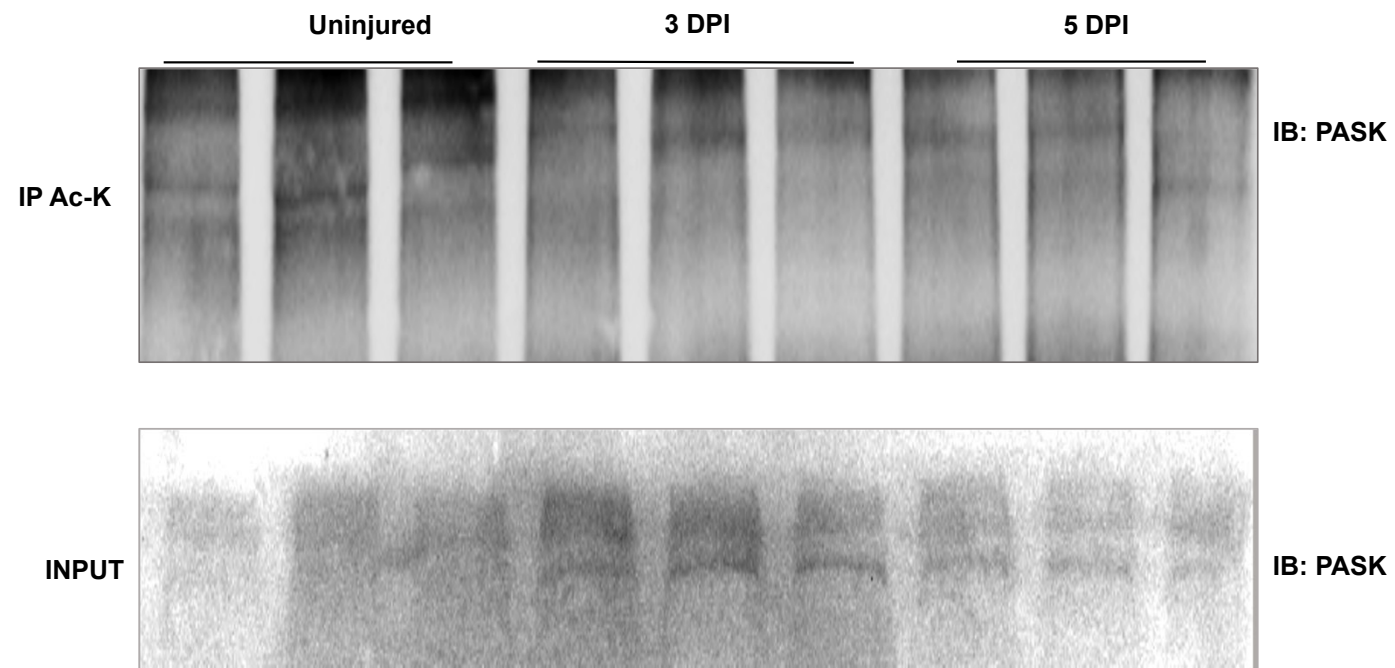

Supplement: supp [file elife-81717-supp-v1.zip]

**Figure 3 – Source Data Table 2**

**
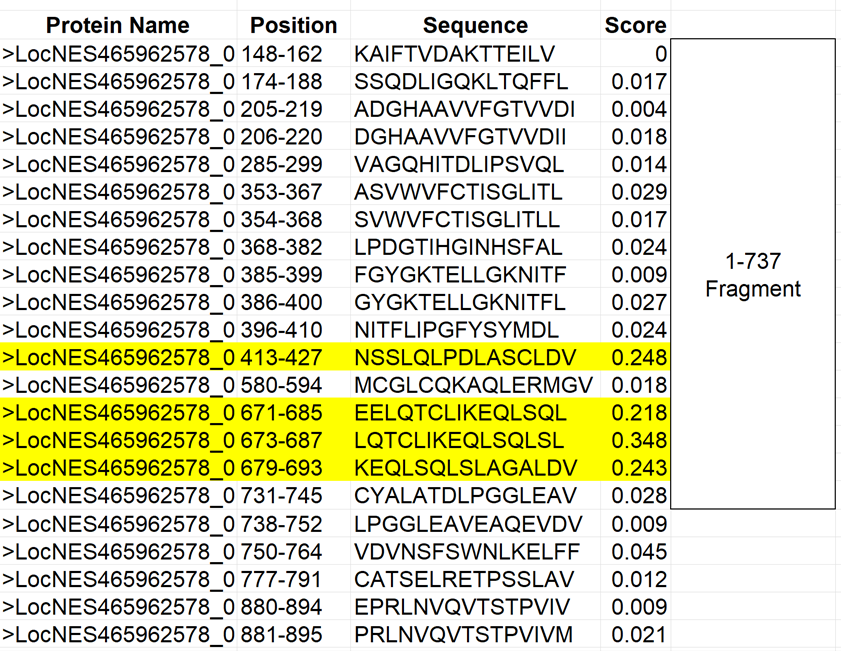
**

Supplement: supp [file Figure 3 - Figure supplement 2.docx]

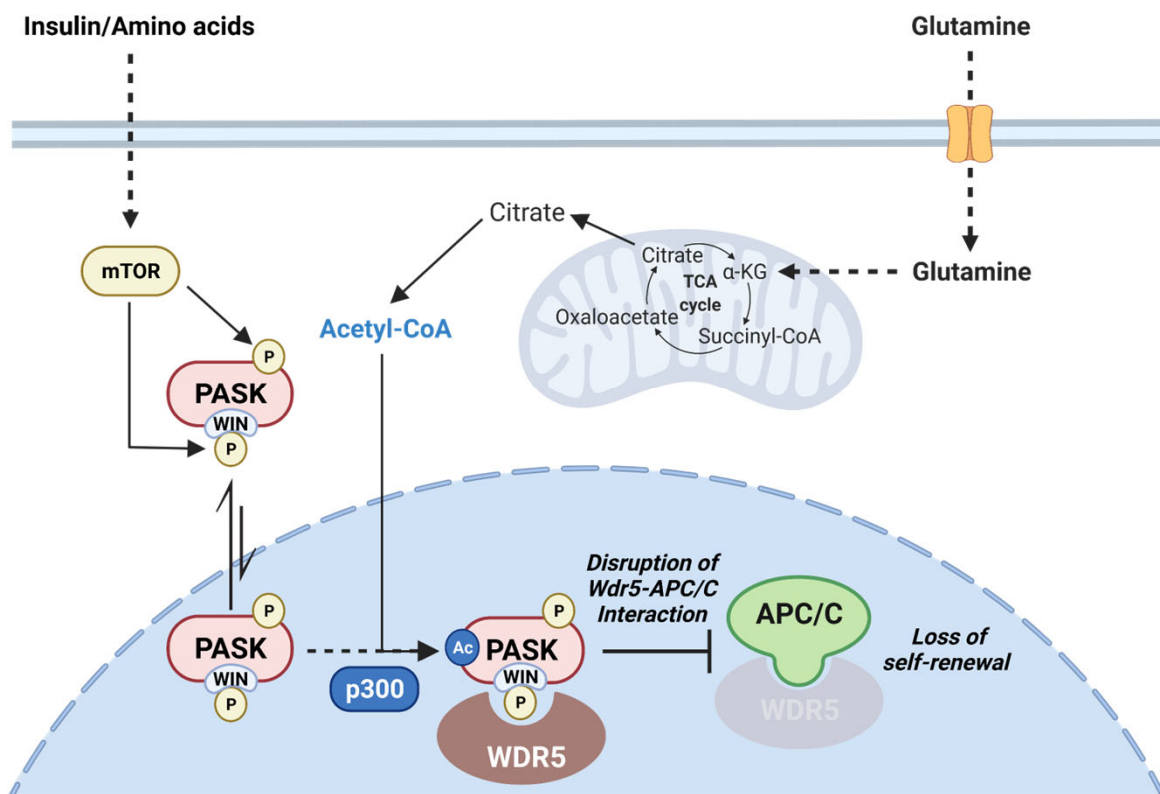

Figure 7- figure supplement 2

Supplement: supp [file elife-81717-supp-v1.zip]

Figure 4 – figure supplement 1E

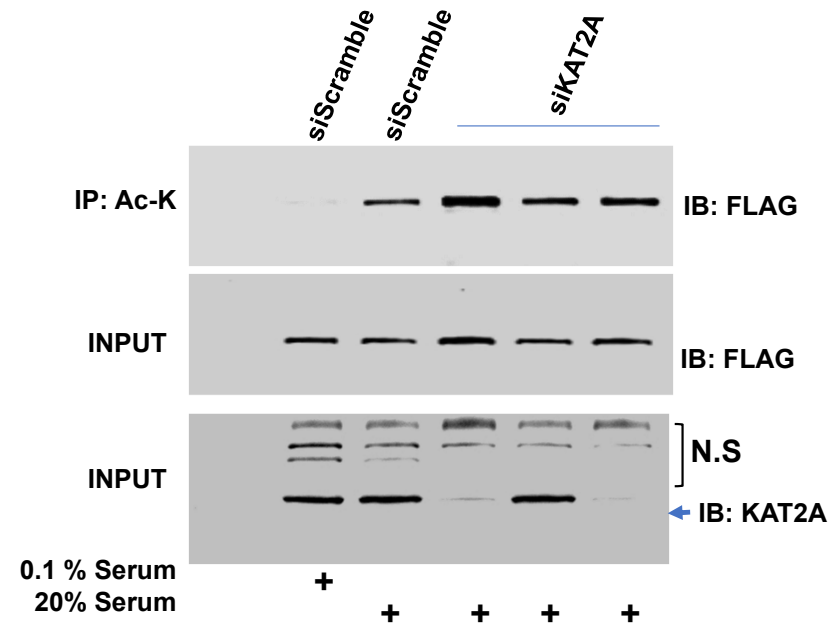

Supplement: supp [file elife-81717-supp-v1.zip]

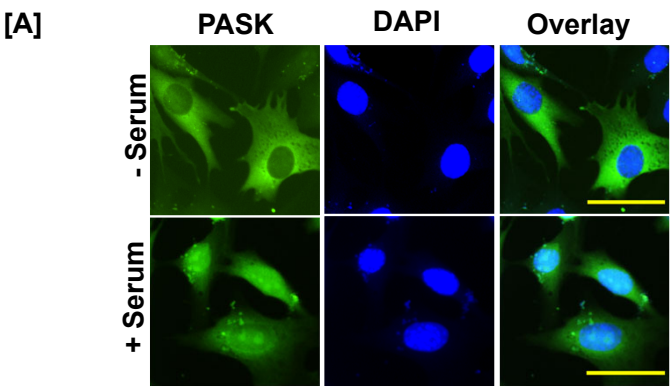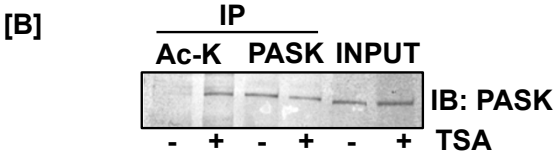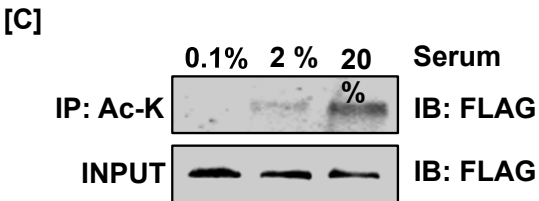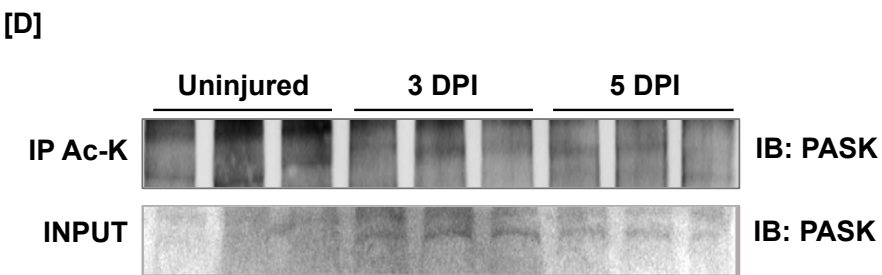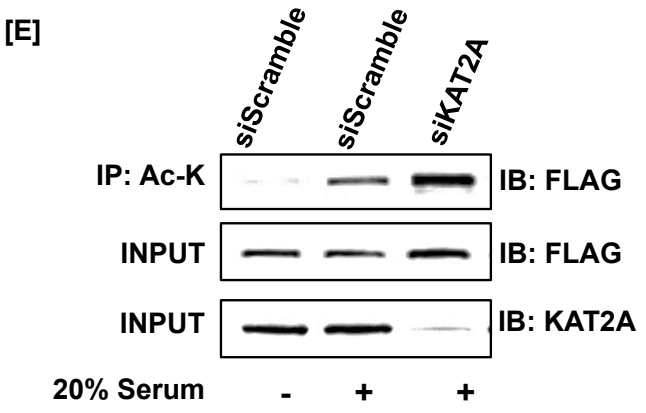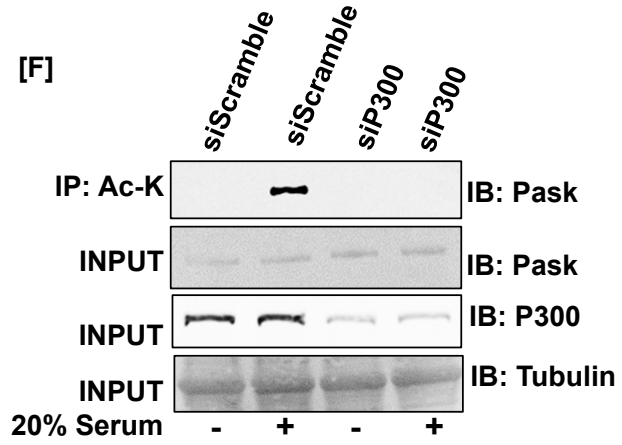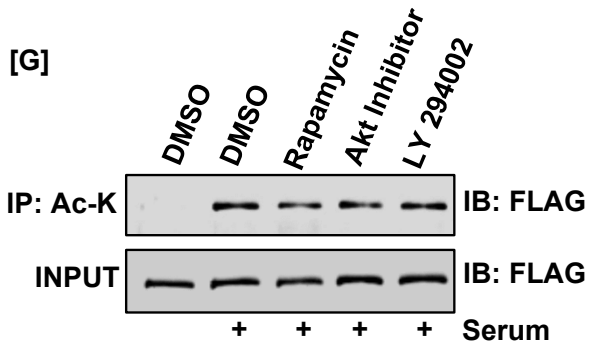

Figure 4- figure supplement 1

Supplement: supp [file elife-81717-supp-v1.zip]

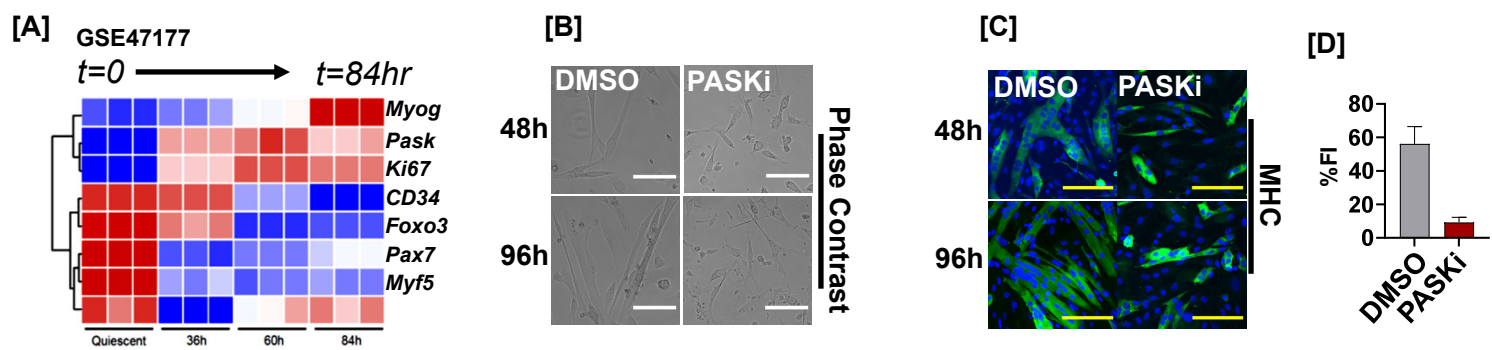

Figure 1- figure Supplement 2

Supplement: supp [file elife-81717-supp-v1.zip]

**Figure 4F**

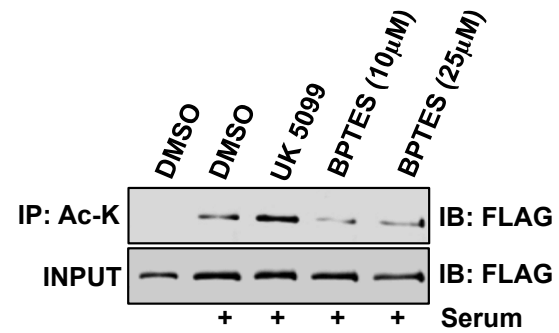

**Source Data**

**Figure 4 – figure  
supplement 1G**

**Figure 4F**

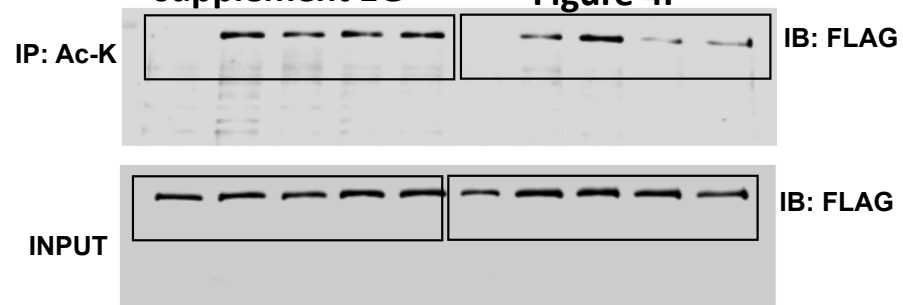

Supplement: supp [file elife-81717-supp-v1.zip]

**Figure 7D**

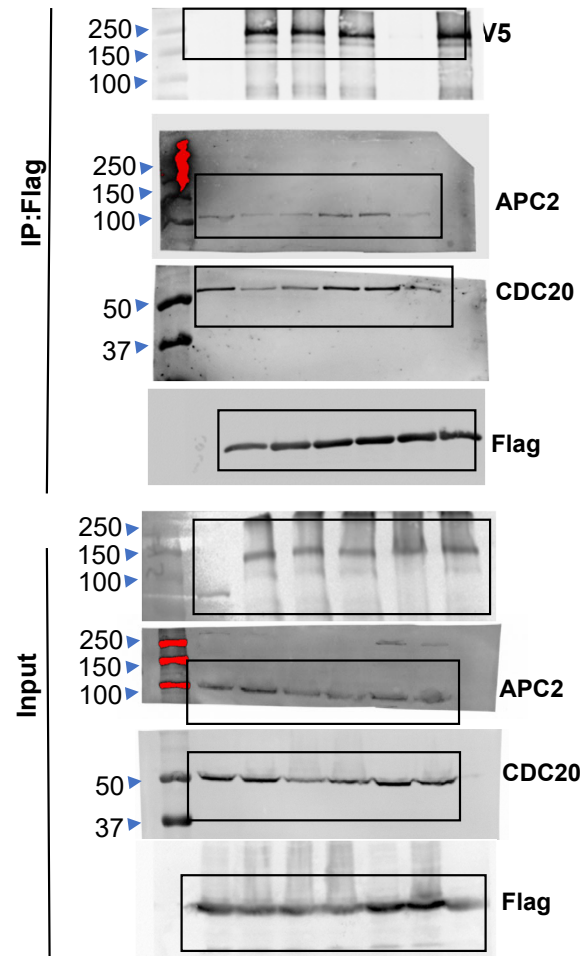

Supplement: supp [file elife-81717-supp-v1.zip]

### Figure 7E

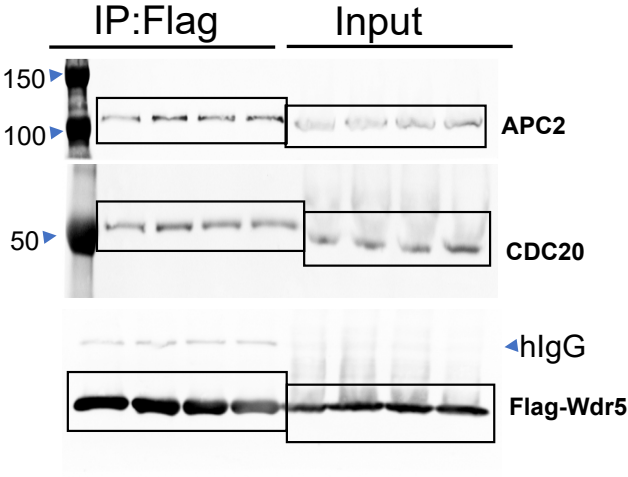

Supplement: supp [file elife-81717-supp-v1.zip]

Figure 7 – figure supplement 1B

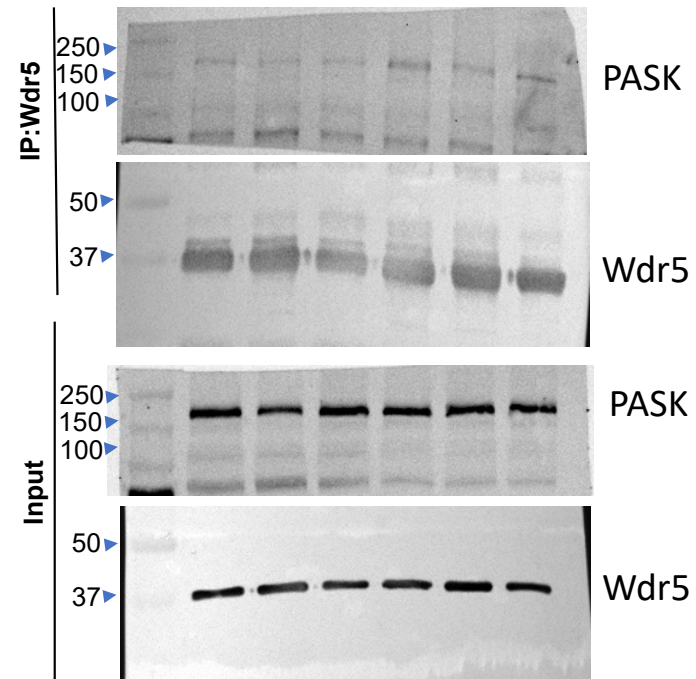

Supplement: supp [file elife-81717-supp-v1.zip]

**Figure 4C**

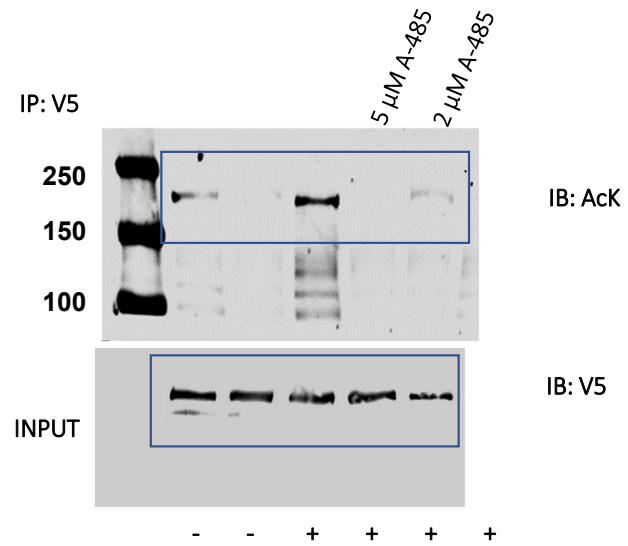

Supplement: supp [file elife-81717-supp-v1.zip]

**Figure 4 – figure supplement 1B**

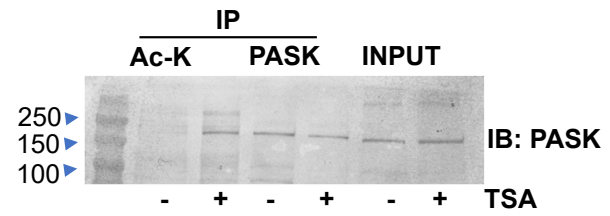

Supplement: supp [file elife-81717-supp-v1.zip]
